# Supplementary material for: DNA methylation regulator-mediated modification patterns and tumor microenvironment characterization in glioma
Source: Aging (Albany NY). 2022 Sep 21;14(19):7824–50. doi: 10.18632/aging.204291 (PMC9596205; doi:10.18632/aging.204291)
Supplement: Supplementary Table 1 [file aging-14-204291-s002.xlsx]

## Sheet: Supplementary Table 1
Supplementary Table 1. Basic information of datasets included in this study for identifying distinct DNA methylation modification patterns.
Accession number /Source	Number of patients	Grade	Sex	Age	IDH	1p19q	Survival data
TCGA	648	II:238 III:257 IV:153	Female:272 Male:376	<50:369 >=50:279	Mutant: 410 Wildtype: 230 NA: 8	Codel: 164 Non-codel: 479 NA: 5	OS
CGGA1	309	II:98 III:74 IV:137	Female:116 Male:193	<50:213 >=50:96	Mutant: 166 Wildtype: 142 NA: 1	Codel: 62 Non-codel: 242 NA: 5	OS
CGGA2	593	II:156 III:227 IV:210	Female:258 Male:335	<50:426 >=50:167	Mutant: 306 Wildtype: 239 NA: 48	Codel: 137 Non-codel: 453 NA:3	OS
GEO: GSE16011	263	II:21 III:92 IV:150	Female:87 Male:176	<50:126 >=50:137	Mutant: 71 Wildtype: 116 NA: 76	Codel: 43 Non-codel: 92 NA: 128	OS
GEO: GSE108474	415	II:86 III:83 IV:210 NA: 36	Female:122 Male:198 NA: 95	<50:178 >=50:190 NA: 47	NA: 415	NA: 415	OS
