# Supplementary material for: DNA methylation regulator-mediated modification patterns and tumor microenvironment characterization in glioma
Source: Aging (Albany NY). 2022 Sep 21;14(19):7824–50. doi: 10.18632/aging.204291 (PMC9596205; doi:10.18632/aging.204291)
Supplement: Supplementary Table 2 [file aging-14-204291-s003.xlsx]

## Sheet: Supplementary Table 2
Supplementary Table 2. Spearman correlation analysis of the 20 DNA methylation modification regulators.
From	To	Cor	P value（<0.00001）	Weight
TET1	TET2	0.624485	3.30785e-241	3.74691
TET1	TET3	0.596505	7.55284e-215	3.57903
TET1	MBD1	0.341436	6.00321e-62	2.04861
TET1	MBD2	-0.162475	1.19912e-14	0.974852
TET1	MBD3	-0.141823	1.76132e-11	0.850939
TET1	ZBTB33	0.47163	8.79029e-124	2.82978
TET1	ZBTB38	0.229364	5.51716e-28	1.37619
TET1	ZBTB4	0.355348	2.67738e-67	2.13209
TET1	UHRF1	0.246908	2.67974e-32	1.48145
TET1	UHRF2	0.274346	9.2136e-40	1.64607
TET1	MECP2	0.345035	2.63163e-63	2.07021
TET1	TDG	0.231764	1.48723e-28	1.39058
TET1	DNMT1	0.187281	4.92223e-19	1.12369
TET1	DNMT3A	0.0990125	2.83473e-06	0.594075
TET1	DNMT3B	0.23949	1.97271e-30	1.43694
TET2	TET3	0.640027	4.7736e-257	3.84016
TET2	MBD1	0.408216	3.18442e-90	2.44929
TET2	MBD2	0.0834379	8.04431e-05	0.500627
TET2	MBD4	0.229904	4.11287e-28	1.37943
TET2	ZBTB33	0.59989	6.72706e-218	3.59934
TET2	ZBTB38	0.491537	7.2e-136	2.94922
TET2	ZBTB4	0.373032	1.69011e-74	2.23819
TET2	UHRF1	0.414453	3.24304e-93	2.48672
TET2	UHRF2	0.387134	1.42787e-80	2.32281
TET2	MECP2	0.368129	1.86032e-72	2.20878
TET2	UNG	0.161309	1.85946e-14	0.967853
TET2	TDG	0.397872	2.11995e-85	2.38723
TET2	NTHL1	-0.212087	4.47772e-24	1.27252
TET2	SMUG1	0.0853265	5.51509e-05	0.511959
TET2	DNMT1	0.326303	1.97435e-56	1.95782
TET2	DNMT3A	0.336836	3.07904e-60	2.02101
TET2	DNMT3B	0.291102	9.13487e-45	1.74661
TET3	MBD1	0.547179	3.12022e-174	3.28308
TET3	MBD2	0.144196	8.01815e-12	0.865174
TET3	MBD4	0.220555	5.97714e-26	1.32333
TET3	ZBTB33	0.547279	2.62312e-174	3.28367
TET3	ZBTB38	0.369347	5.83121e-73	2.21608
TET3	ZBTB4	0.401088	6.99557e-87	2.40653
TET3	UHRF1	0.413054	1.54112e-92	2.47832
TET3	UHRF2	0.412015	4.87625e-92	2.47209
TET3	MECP2	0.557161	6.61629e-182	3.34297
TET3	UNG	0.21328	2.46379e-24	1.27968
TET3	TDG	0.394317	8.80776e-84	2.3659
TET3	NTHL1	-0.19573	1.12103e-20	1.17438
TET3	DNMT1	0.3978	2.28706e-85	2.3868
TET3	DNMT3A	0.396779	6.69747e-85	2.38067
TET3	DNMT3B	0.422973	2.08936e-97	2.53784
MBD1	MBD2	0.39267	4.87296e-83	2.35602
MBD1	MBD3	0.168437	1.21143e-15	1.01062
MBD1	MBD4	0.34227	2.91723e-62	2.05362
MBD1	ZBTB33	0.459259	1.15349e-116	2.75555
MBD1	ZBTB38	0.317428	2.44347e-53	1.90457
MBD1	ZBTB4	0.333611	4.67444e-59	2.00167
MBD1	UHRF1	0.443033	9.19041e-108	2.6582
MBD1	UHRF2	0.449553	2.7828e-111	2.69732
MBD1	MECP2	0.482921	1.53759e-130	2.89753
MBD1	UNG	0.354018	8.93091e-67	2.12411
MBD1	TDG	0.423233	1.55046e-97	2.5394
MBD1	SMUG1	0.278779	4.72067e-41	1.67268
MBD1	DNMT1	0.480787	3.04315e-129	2.88472
MBD1	DNMT3A	0.469159	2.45133e-122	2.81495
MBD1	DNMT3B	0.421245	1.51273e-96	2.52747
MBD2	MBD4	0.636753	1.23526e-253	3.82052
MBD2	ZBTB33	0.265391	3.15056e-37	1.59235
MBD2	ZBTB38	0.240755	9.57591e-31	1.44453
MBD2	UHRF1	0.266116	1.98055e-37	1.5967
MBD2	UHRF2	0.440252	2.76439e-106	2.64151
MBD2	MECP2	0.16073	2.30878e-14	0.964381
MBD2	UNG	0.535882	7.45494e-166	3.21529
MBD2	TDG	0.540302	4.28786e-169	3.24181
MBD2	NTHL1	-0.290007	1.98824e-44	1.74004
MBD2	SMUG1	0.230182	3.53579e-28	1.38109
MBD2	DNMT1	0.366391	9.65935e-72	2.19835
MBD2	DNMT3A	0.487875	1.38404e-133	2.92725
MBD2	DNMT3B	0.365647	1.95032e-71	2.19388
MBD3	MBD4	-0.0938377	9.13883e-06	0.563026
MBD3	ZBTB38	-0.316338	5.76391e-53	1.89803
MBD3	ZBTB4	-0.130427	6.43693e-10	0.782563
MBD3	UHRF1	0.328511	3.23381e-57	1.97107
MBD3	UNG	0.0865151	4.33173e-05	0.51909
MBD3	NTHL1	0.486341	1.22928e-132	2.91805
MBD3	SMUG1	0.225175	5.24999e-27	1.35105
MBD3	DNMT1	0.40168	3.71973e-87	2.41008
MBD3	DNMT3A	0.190289	1.30658e-19	1.14173
MBD3	DNMT3B	0.214164	1.57962e-24	1.28498
MBD4	ZBTB33	0.310511	5.32982e-51	1.86306
MBD4	ZBTB38	0.426073	5.82277e-99	2.55644
MBD4	UHRF1	0.247898	1.49334e-32	1.48739
MBD4	UHRF2	0.531654	8.44098e-163	3.18993
MBD4	MECP2	0.223611	1.20351e-26	1.34167
MBD4	UNG	0.47547	4.72635e-126	2.85282
MBD4	TDG	0.57537	1.34981e-196	3.45222
MBD4	NTHL1	-0.282052	5.08168e-42	1.69231
MBD4	SMUG1	0.248168	1.27275e-32	1.48901
MBD4	DNMT1	0.337997	1.14617e-60	2.02798
MBD4	DNMT3A	0.502577	6.32829e-143	3.01546
MBD4	DNMT3B	0.338079	1.06877e-60	2.02848
ZBTB33	ZBTB38	0.376422	6.23843e-76	2.25853
ZBTB33	ZBTB4	0.266976	1.13989e-37	1.60186
ZBTB33	UHRF1	0.417256	1.39818e-94	2.50354
ZBTB33	UHRF2	0.42131	1.40522e-96	2.52786
ZBTB33	MECP2	0.499035	1.24077e-140	2.99421
ZBTB33	UNG	0.471195	1.58233e-123	2.82717
ZBTB33	TDG	0.481198	1.7149e-129	2.88719
ZBTB33	NTHL1	-0.155915	1.3556e-13	0.935488
ZBTB33	SMUG1	0.179718	1.25319e-17	1.07831
ZBTB33	DNMT1	0.386587	2.48765e-80	2.31952
ZBTB33	DNMT3A	0.354095	8.33485e-67	2.12457
ZBTB33	DNMT3B	0.349418	5.51534e-65	2.09651
ZBTB38	ZBTB4	0.478256	1.02196e-127	2.86953
ZBTB38	UHRF1	0.0849789	5.91527e-05	0.509874
ZBTB38	UHRF2	0.288718	4.94267e-44	1.73231
ZBTB38	MECP2	0.366657	7.51238e-72	2.19994
ZBTB38	UNG	0.22199	2.82427e-26	1.33194
ZBTB38	TDG	0.241434	6.48318e-31	1.44861
ZBTB38	NTHL1	-0.462381	1.96466e-118	2.77428
ZBTB38	DNMT3A	0.289953	2.06492e-44	1.73972
ZBTB4	UHRF2	0.0981435	3.46479e-06	0.588861
ZBTB4	MECP2	0.507718	2.66725e-146	3.04631
ZBTB4	NTHL1	-0.266512	1.53636e-37	1.59907
UHRF1	UHRF2	0.384738	1.61323e-79	2.30843
UHRF1	MECP2	0.189188	2.12888e-19	1.13513
UHRF1	UNG	0.469245	2.18317e-122	2.81547
UHRF1	TDG	0.53182	6.41747e-163	3.19092
UHRF1	NTHL1	0.117314	2.80011e-08	0.703884
UHRF1	SMUG1	0.228602	8.3415e-28	1.37161
UHRF1	DNMT1	0.69031	3.2910468886363e-315	4.14186
UHRF1	DNMT3A	0.435958	4.96828e-104	2.61575
UHRF1	DNMT3B	0.556944	9.77365e-182	3.34166
UHRF2	MECP2	0.298586	4.10674e-47	1.79152
UHRF2	UNG	0.329758	1.15669e-57	1.97855
UHRF2	TDG	0.577527	2.13104e-198	3.46516
UHRF2	NTHL1	-0.184279	1.80924e-18	1.10567
UHRF2	SMUG1	0.121576	8.57659e-09	0.729453
UHRF2	DNMT1	0.446025	2.28034e-109	2.67615
UHRF2	DNMT3A	0.454822	3.50076e-114	2.72893
UHRF2	DNMT3B	0.469436	1.68847e-122	2.81662
MECP2	UNG	0.222635	2.01315e-26	1.33581
MECP2	TDG	0.202075	5.8308e-22	1.21245
MECP2	NTHL1	-0.228149	1.06551e-27	1.3689
MECP2	SMUG1	0.143443	1.03081e-11	0.860655
MECP2	DNMT1	0.256456	8.54344e-35	1.53874
MECP2	DNMT3A	0.325215	4.78908e-56	1.95129
MECP2	DNMT3B	0.211765	5.25555e-24	1.27059
UNG	TDG	0.591159	4.20416e-210	3.54695
UNG	NTHL1	-0.082996	8.77727e-05	0.497976
UNG	SMUG1	0.285537	4.57956e-43	1.71322
UNG	DNMT1	0.445625	3.74912e-109	2.67375
UNG	DNMT3A	0.48533	5.15367e-132	2.91198
UNG	DNMT3B	0.46465	9.91286e-120	2.7879
TDG	SMUG1	0.327786	5.86519e-57	1.96672
TDG	DNMT1	0.630346	4.48188e-247	3.78208
TDG	DNMT3A	0.541522	5.3696e-170	3.24913
TDG	DNMT3B	0.653821	6.78306e-272	3.92293
NTHL1	SMUG1	0.240529	1.0894e-30	1.44318
NTHL1	DNMT1	0.22693	2.05406e-27	1.36158
NTHL1	DNMT3A	-0.102985	1.10866e-06	0.617911
SMUG1	DNMT1	0.277898	8.55779e-41	1.66739
SMUG1	DNMT3A	0.273275	1.87294e-39	1.63965
SMUG1	DNMT3B	0.210983	7.75616e-24	1.2659
DNMT1	DNMT3A	0.520928	3.04604e-155	3.12557
DNMT1	DNMT3B	0.659927	1.01786e-278	3.95956
DNMT3A	DNMT3B	0.565988	6.50836e-189	3.39593
