# Supplementary material for: DNA methylation regulator-mediated modification patterns and tumor microenvironment characterization in glioma
Source: Aging (Albany NY). 2022 Sep 21;14(19):7824–50. doi: 10.18632/aging.204291 (PMC9596205; doi:10.18632/aging.204291)
Supplement: Supplementary Table 3 [file aging-14-204291-s004.xlsx]

## Sheet: Supplementary Table 3
Supplementary Table 3. Estimating relative abundance of tumor microenvironment cells in 2228 glioma patients by the Single-Sample Gene-Set Enrichment Analysis (ssGSEA).
ID	Pattern	B cells naive	B cells memory	Plasma cells	T cells CD8	T cells CD4 naive	T cells CD4 memory resting	T cells CD4 memory activated	T cells follicular helper	T cells regulatory (Tregs)	T cells gamma delta	NK cells resting	NK cells activated	Monocytes	Macrophages M0	Macrophages M1	Macrophages M2	Dendritic cells resting	Dendritic cells activated	Mast cells resting	Mast cells activated	Eosinophils	Neutrophils	P-value	Correlation	RMSE
CGGA_1002	Pattern A	0.024622	0	0	0.0308549	0	0.0819707	0	0.038828	0	0	0	0.0830776	0.256098	0	0.0304015	0.270933	0.0411288	0	0	0.142086	0	0	0.14	0.138602	1.04477
CGGA_1003	Pattern A	0	0.114042	0.0398829	0	0.122768	0.0693235	0	0.0866345	0.0171903	0	0	0.134084	0.0324917	0	0	0.218413	0.0137046	0	0	0.139058	0.0124074	0	0.9	-0.0250557	1.11057
CGGA_1005	Pattern A	0.0293544	0	0.000259323	0	0	0.235728	0	0	0.153406	0	0.0687786	0.0179456	0.0385774	0	0	0.19911	0.0695117	0	0	0.18037	0	0.00695883	0.43	0.0439101	1.07739
CGGA_1007	Pattern A	0.0742834	0	0	0.0569986	0	0.11797	0	0	0.157903	0	0.113405	0	0.0436402	0.156638	0.00467348	0.2333	0	0	0.041189	0	0	0	0.21	0.0988754	1.05543
CGGA_1011	Pattern A	0.0607219	0	0.00435089	0.0284807	0	0.0925391	0	0.0133424	0.0069855	0	0	0.0109968	0.180086	0	0.0168195	0.272268	0.00336957	0	0	0.302856	0.00718493	0	0.22	0.095377	1.06884
CGGA_1012	Pattern A	0.0188051	0	0.00391894	0.0104122	0	0.034064	0	0.0105199	0.0210136	0	0.00508836	0.0239747	0	0.211549	0.00279572	0.553177	0	0	0	0.0964765	0	0.00820548	0	0.463794	0.897177
CGGA_1013	Pattern A	0	0.00791945	0.00612251	0.0301444	0.133156	0	0	0	0	0	0.000237175	0.038775	0.0206603	0	0.00292682	0.237322	0.034549	0	0	0.452646	0.029979	0.0055615	0	0.457422	0.895477
CGGA_1014	Pattern A	0	0.0637438	0	0.0119109	0	0.0554297	0	0.077454	0	0	0	0.0371414	0.134209	0	0.0302499	0.275283	0	0	0	0.314578	0	0	0.21	0.0973463	1.06956
CGGA_1015	Pattern A	0.00723699	0	0	0.0562738	0	0.0618204	0	0.0289933	0.026197	0.008348	0.00167614	0	0	0.22288	0.0579791	0.472957	0	0	0.0363935	0.00212306	0	0.0171215	0	0.687859	0.736959
CGGA_1017	Pattern A	0.0204183	0	0	0	0	0.304649	0	0	0.0352578	0	0	0.0943013	0.036642	0.0505271	0.00058461	0.107663	0	0.00187187	0.327015	0	0.0127154	0.00835449	0.78	-0.00502653	1.0818
CGGA_1022	Pattern A	0	0.0419428	0.00419328	0.0270133	0	0.112719	0	0.0355598	0	0	0	0.105838	0.067724	0	0.00202181	0.302638	0.00322605	0.00703846	0	0.269437	0.00868932	0.0119602	0.39	0.0494658	1.09638
CGGA_1030	Pattern A	0.0108164	0	0	0.131211	0.00794544	0	0	0.00347975	0.0077903	0	0	0.115155	0.114642	0	0.00361534	0.212323	0.0796451	0	0	0.30443	0.00894744	0	0.91	-0.0278991	1.14276
CGGA_1031	Pattern A	0.0323785	0	0	0.0337626	0	0.0890818	0	0	0.148893	0	0.12627	0.0118014	0.12694	0	0.00632425	0.273357	0.00192298	0	0	0.101536	0	0.0477326	0.14	0.141776	1.0362
CGGA_1034	Pattern A	0	0.0120581	0.00218313	0	0	0.0584235	0	0.0495253	0	0.0015503	0	0.0305875	0.0883637	0	0.0379865	0.117948	0	0	0	0.587221	0.0141537	0	0	0.573615	0.822216
CGGA_1035	Pattern A	0.048158	0	0	0	0	0.127921	0	0.0148132	0.0161891	0	0.0856207	0	0	0.229003	0.00229377	0.284734	0	0.00363562	0	0.134253	0	0.0533787	0.08	0.172677	1.03863
CGGA_1041	Pattern A	0.0705021	0	0	0	0	0.0742511	0	0	0	0	0	0.0194139	0.211801	0	0	0.35129	0.0366469	0	0.1279	0.105912	0	0.00228302	0.22	0.0940084	1.05939
CGGA_1048	Pattern A	0.0102536	0	0	0.00492055	0	0.098589	0	0.0112078	0	0	0	0.0562304	0.120266	0	0.0245324	0.37224	0.0519989	0.00364159	0	0.243319	0	0.00280098	0.07	0.185438	1.03177
CGGA_1049	Pattern A	0	0	0.00991061	0.0324196	0	0.0658052	0	0.0329141	0.0555341	0	0.0712477	0	0.0221995	0.363066	0.000792684	0.150566	0	0	0	0.185542	0	0.0100023	0.17	0.12306	1.08127
CGGA_1053	Pattern A	0.0425437	0	0	0.0459475	0	0.0259685	0	0.00827843	0.0233576	0	0.00430148	0.0294503	0.0569239	0.14121	0.0363405	0.49887	0	0	0.0399199	0.0308264	0	0.0160617	0.02	0.280112	0.991348
CGGA_1058	Pattern A	0.0445665	0	0	0.00496886	0	0.0613148	0	0	0	0	0	0.0430154	0.183451	0	0.00118455	0.486026	0	0.00180781	0.173665	0	0	0	0.05	0.230498	1.00505
CGGA_1059	Pattern A	0.0527928	0	0.0337462	0.0779984	0	0.0380952	0	0	0.00340952	0	0	0.0608874	0.00185263	0	0.0181693	0.554421	0.11218	0	0	0.046447	0	0	0.01	0.281661	0.985149
CGGA_1061	Pattern A	0	0	0.00167592	0	0	0.136503	0	0	0.0130889	0	0.0413314	0.029466	0.143341	0	0	0.327657	0.0268393	0.0135416	0	0.232782	0	0.033775	0.21	0.0989781	1.06601
CGGA_1066	Pattern A	0.0858672	0	0	0	0	0.120402	0	0	0	0	0.0474862	0.0120401	0.246488	0	0.000769721	0.355524	0.0133146	0	0.0397215	0	0	0.0783864	0.07	0.18829	1.02586
CGGA_1071	Pattern A	0	0.0395595	0	0	0	0.155035	0	0.0241659	0.0587804	0	0.0416203	0	0	0.090593	0.0108322	0.240336	0	0	0	0.245208	0.0236975	0.0701728	0.25	0.0823783	1.06724
CGGA_1074	Pattern A	0.00392877	0	0.0123331	0.0915466	0	0.0234985	0	0.0139281	0.00597205	0	0	0.00845474	0.0897635	0	0.0368152	0.545904	0.111817	0	0	0.028233	0	0.0278055	0.02	0.276253	0.991659
CGGA_1083	Pattern A	0.0891647	0	0	0.0612243	0	0.0437964	0	0.00585415	0.0224072	0	0.0642332	0	0.08619	0	0.00356888	0.57613	0	0	0.00906268	0.00346144	0	0.0349071	0.31	0.0569504	1.09681
CGGA_1087	Pattern A	0	0.154915	0.0628717	0	0.0921275	0.0642827	0	0	0.113124	0	0.190715	0	0.0324811	0.0290736	0.00191021	0.180548	0	0	0.0684391	0	0.00951156	0	0.99	-0.0483294	1.10514
CGGA_1099	Pattern A	0.0359835	0	0.0292802	0.0896208	0	0.0602792	0	0.0379941	0	0.0239158	0	0.049177	0.0701151	0	0.0244918	0.526049	0	0	0.0530935	0	0	0	0.01	0.292257	0.973091
CGGA_1109	Pattern A	0	0.0512143	0.0303151	0	0	0.133405	0	0	0.0984855	0	0.0768645	0.0264778	0.031191	0.00537444	0.00868296	0.360638	0	0	0.144215	0	0.0139569	0.0191792	0.51	0.0326517	1.06525
CGGA_1111	Pattern A	0	0.00914851	0.00102498	0.0624481	0	0.00323463	0	0.0124716	0.036407	0	0.00407574	0.00176519	0	0.246314	0.0210444	0.529155	0	0	0	0.0683717	0	0.00453906	0	0.631065	0.775762
CGGA_1114	Pattern A	0.0380831	0	0.00152605	0.052477	0	0.010168	0	0.0134884	0.0193142	0	0	0.0374361	0.0909198	0	0.0258656	0.469132	0.0713033	0	0.0341636	0	0	0.136123	0	0.372786	0.938096
CGGA_1124	Pattern A	0.0906225	0	0.0199962	0.0699382	0	0.049878	0	0.0236834	0	0	0.0100798	0	0.089212	0	0.0228467	0.390167	0.0425258	0.0296752	0.0231607	0.0431666	0.0353387	0.0597094	0.26	0.0713204	1.06285
CGGA_1136	Pattern A	0.0306557	0	0.00677553	0.0255706	0	0.0614955	0	0	0.0106833	0	0	0.0309866	0.258545	0	0.00410927	0.440538	0	0.00356081	0.114945	0.00472575	0	0.00740935	0.01	0.284112	0.980626
CGGA_1145	Pattern A	0.0428592	0	0.00152277	0.0435685	0	0	0	0	0.022376	0	0	0.0069252	0.193011	0.025284	0.0128806	0.51873	0	0	0.132843	0	0	0	0.17	0.121502	1.06672
CGGA_1147	Pattern A	0	0.0767497	0.0379747	0.0119801	0	0.136421	0	0	0.0771098	0	0.0731311	0.0318826	0.0324153	0	0	0.246993	0	0.010549	0.217559	0	0.0415373	0.00569726	0.21	0.103625	1.02891
CGGA_1156	Pattern A	0	0.0151178	0.00815009	0.00525761	0	0.0592626	0	0.0286942	0	0	0	0.0484849	0.0950758	0	0.00109594	0.176841	0.0645418	0	0	0.485889	0.0115897	0	0.01	0.28748	1.00274
CGGA_1158	Pattern A	0	0.0241699	0	0	0.0247047	0.0208794	0	0.0578196	0	0	0	0.0642361	0.168704	0	0.00130699	0.4884	0	0	0	0.140607	0.00917281	0	0.19	0.113483	1.07203
CGGA_1160	Pattern A	0.0177254	0	0.000231188	0.118726	0	0	0	0.0258576	0	0	0	0.0604273	0.0552234	0	0.0206091	0.414973	0.111821	0	0	0.155995	0	0.0184102	0.17	0.121494	1.05627
CGGA_1164	Pattern A	0	0.0187372	0	0	0.00180343	0.0843669	0	0.0710793	0	0	0	0.0459653	0.157774	0	0	0.480983	0	0	0.0596935	0.0795968	0	0	0.22	0.0942901	1.06943
CGGA_1172	Pattern A	0	0.0348956	0.00355799	0.00978451	0	0.0967015	0	0	0.0197336	0	0	0.0481314	0.219097	0	0.00626642	0.465872	0	0.00382099	0.0669625	0	0.0196195	0.00555744	0	0.391436	0.925044
CGGA_1185	Pattern A	0	0.00471873	0	0.0252021	0	0.127089	0	0.0505241	0.0450649	0	0	0.076364	0.0109797	0.0423241	0	0.371093	0	0.0261519	0.220488	0	0	0	0.3	0.0623963	1.05979
CGGA_1191	Pattern A	0.12852	0	0.0497932	0	0.136418	0.130794	0	0.0633907	0	0	0	0.0463329	0	0	0.00297148	0.317337	0.113501	0	0	0.0109428	0	0	0.95	-0.0299188	1.10297
CGGA_1192	Pattern A	0.0327233	0	0	0.0713565	0	0.018319	0	0.0225451	0.00733127	0	0	0.0541153	0.247525	0	0	0.191798	0	0	0	0.290092	0.0641937	0	0.06	0.204311	1.02322
CGGA_1197	Pattern A	0	0.0146086	0.0272522	0.0259236	0.0121052	0.0376804	0	0	0	0	0.0516356	0.0435354	0.0539872	0	0.000513828	0.596061	0.0443349	0	0	0.088255	0	0.00410759	0.17	0.123312	1.07405
CGGA_1211	Pattern A	0	0.0136241	0.00376367	0.0114382	0	0.00339378	0	0.063734	0	0	0	0.0224158	0.0469924	0	0.00879563	0.0920899	0.125175	0	0	0.56367	0.0449077	0	0	0.428803	0.923738
CGGA_1215	Pattern A	0.0171487	0	0	0.0438185	0	0.0426146	0	0.000562268	0.00194844	0	0	0.0250788	0.0450981	0.0291176	0.00442858	0.591589	0	0	0	0.174446	0	0.0241499	0.04	0.254857	1.01376
CGGA_1218	Pattern A	0.0668157	0	0.0255619	0.066744	0	0.0768222	0	0	0.045502	0	0.026891	0	0.0705016	0	0.0187872	0.536123	0.0216394	0	0	0.0282827	0	0.0163299	0.22	0.0929691	1.07002
CGGA_1219	Pattern A	0	0.0618244	0.022239	0.036119	0.0169919	0.0580355	0	0	0.0784931	0	0	0.0458495	0.0730169	0	0	0.423281	0.00910733	0	0	0.144834	0.0228838	0.00732433	0.06	0.202435	1.01204
CGGA_1226	Pattern A	0.0131138	0	0	0.0025983	0	0.148455	0	0	0.0585012	0	0.0592016	0	0.0175824	0	0	0.348361	0	0.0152955	0.322297	0	0	0.0145935	0.15	0.137447	1.02253
CGGA_1227	Pattern A	0.0566959	0	0	0.0755035	0	0.0559636	0	0	0.0591166	0	0	0.0869454	0.0558286	0	0	0.27053	0	0.0080669	0.298757	0	0.0123782	0.0202137	0.32	0.0564037	1.05126
CGGA_1232	Pattern A	0.0214528	0	0	0.0428761	0	0.0597881	0	0.00871231	0	0	0	0.0840577	0.295394	0	0.00476309	0.38382	0	0	0	0.0903509	0.00745162	0.00133298	0.13	0.145232	1.05538
CGGA_1234	Pattern A	0.0100977	0	0	0.0384375	0	0.174698	0.0138285	0.0244398	0	0	0	0.0715036	0.0774633	0.00671819	0	0.51566	0	0.0079719	0.0179621	0.0185437	0	0.0226753	0.5	0.0344072	1.09985
CGGA_1235	Pattern A	0	0.0286134	0.00888785	0.0415409	0.0486575	0.0140793	0	0.00134846	0.0120999	0	0.0325786	0.0310658	0.157824	0	0.0101582	0.241284	0.0317901	0	0	0.328618	0.00131619	0.010137	0.05	0.249624	0.999593
CGGA_1236	Pattern A	0.0911478	0	0	0.0139463	0	0.0819844	0	0.0303398	0	0	0	0.0820754	0.170061	0	0.00392606	0.398392	0	0.0073042	0	0.120823	0	0	0.39	0.0492613	1.08611
CGGA_1238	Pattern A	0	0.0112854	0.0131211	0.0336239	0	0.0623557	0	0	0	0	0.0183026	0.0052481	0.194084	0	0.0152289	0.450203	0.035408	0	0.16114	0	0	0	0.14	0.141195	1.04304
CGGA_1239	Pattern A	0	0.0830543	0.0229867	0.0436745	0	0.136748	0	0	0.00295737	0	0.0375356	0.089834	0.136446	0	0.000947701	0.319165	0	0	0	0.126651	0	0	0.28	0.0685766	1.07013
CGGA_1240	Pattern A	0.0140085	0	0	0.0101087	0	0.0511307	0	0.0190453	0.00919362	0	0	0.0266101	0.177037	0	0.0149165	0.282606	0.0225843	0	0	0.337052	0.00943086	0.0262771	0.13	0.145575	1.0595
CGGA_1246	Pattern A	0	0.0689291	0.0177787	0.0988326	0	0.0264581	0	0.0319664	0.0448645	0	0.069886	0	0.0215572	0	0.0192379	0.423996	0.157827	0	0.000718251	0	0	0.0179478	0.08	0.16943	1.02398
CGGA_1248	Pattern A	0.0312792	0	0	0	0	0.0770275	0	0.0192342	0	0	0	0.0334409	0.130473	0	0.0199906	0.322482	0.131129	0	0	0.232672	0	0.00227221	0.42	0.0461157	1.08891
CGGA_1255	Pattern A	0	0.0482865	0.0109746	0.000441765	0	0.0884105	0.0632627	0	0	0	0.0338707	0	0.0326344	0	0.0174886	0.529806	0	0.0220925	0.0537647	0	0.0511946	0.0477728	0.23	0.0910232	1.06558
CGGA_1257	Pattern A	0.0359792	0	0.0344606	0.0180331	0	0.0850017	0	0.0252939	0	0	0	0.0243396	0.136822	0	0.0214428	0.379757	0	0	0	0.206732	0.0293696	0.00276833	0.15	0.13543	1.04547
CGGA_1264	Pattern A	0	0.0190096	0.00533945	0.0112992	0	0.128573	0	0	0.0199399	0	0.0735826	0.0381291	0.136102	0	0.00736799	0.336127	0.0835372	0	0	0.125356	0.00196695	0.0136697	0.12	0.154927	1.03174
CGGA_1271	Pattern A	0	0.0463558	0	0.0709114	0	0.201138	0	0.0880841	0	0	0	0.0795801	0.0555151	0	0.0348123	0.289722	0.0452024	0	0.0886785	0	0	0	0.33	0.0559668	1.06494
CGGA_1275	Pattern A	0.0802021	0	0.051308	0.0239012	0	0.126733	0	0.000825431	0.0231626	0	0	0.0765537	0.160166	0	0	0.442569	0	0.00250252	0.0120771	0	0	0	0.2	0.105554	1.05736
CGGA_1280	Pattern A	0	0.0728823	0	0.00544265	0.00925096	0.0237176	0	0.00306845	0	0	0.0103244	0.0055205	0.139019	0	0	0.520722	0	0	0.204882	0	0	0.00516952	0.03	0.264983	0.989788
CGGA_1282	Pattern A	0.092286	0	0	0.0143106	0.000574897	0.144644	0	0	0.0213325	0	0.0732468	0	0.00775712	0	0.0223526	0.583335	0	0.00671425	0.00105454	0.00435402	0	0.0280378	0.52	0.0321589	1.10406
CGGA_1284	Pattern A	0	0	0	0.00786262	0	0.0466138	0	0	0	0	0	0.0240553	0.141378	0	0.0268546	0.587368	0.00378038	0	0.134572	0	0	0.0275156	0	0.30665	0.978844
CGGA_1287	Pattern A	0	0.0135973	0.0108878	0.0699499	0	0.136273	0	0	0.0247309	0	0	0	0.0230633	0	0.0144369	0.57264	0	0.00267449	0.120515	0	0	0.0112308	0.15	0.134781	1.05092
CGGA_1292	Pattern A	0.00719573	0	0	0.274819	0	0	0	0	0.0178191	0	0	0.0709102	0.0224889	0	0	0.445587	0.0317582	0	0.129423	0	0	0	0.17	0.121864	1.05075
CGGA_1300	Pattern A	0.0585508	0	0	0.00837838	0	0.0623894	0	0.0251497	0	0	0	0.0389569	0.307314	0	0	0.328531	0	0	0.0462678	0.124461	0	0	0.05	0.248951	0.997439
CGGA_1307	Pattern A	0.0138076	0	0.000257525	0.0344876	0	0.0843112	0	0	0	0	0.045485	0.0277252	0.217423	0	0.0133987	0.486055	0	0	0.0770494	0	0	0	0.15	0.136381	1.05396
CGGA_1318	Pattern A	0.0520645	0	0.0313191	0.0471366	0	0.0859975	0	0.00693767	0.0181025	0	0	0.0311267	0.0890517	0	0.0157726	0.54849	0.00529156	0	0	0.0541827	0.0122739	0.00225299	0.06	0.203657	1.02127
CGGA_1322	Pattern A	0	0.114686	0.0325744	0	0.00538541	0.0921794	0	0	0.0761147	0	0.108501	0.0507101	0.0439548	0	0	0.29951	0	0	0.176385	0	0	0	0.59	0.020397	1.06871
CGGA_1324	Pattern A	0	0.0394331	0.0149275	0.0259397	0	0.0584862	0	0	0	0	0	0.0440633	0.0528801	0	0.0183019	0.358142	0.164225	0	0	0.204435	0	0.0191663	0.06	0.207605	1.01411
CGGA_1326	Pattern A	0.0116169	0	0.00804589	0.0461056	0	0.0683776	0	0.0502025	0	0	0	0.0983147	0.0872685	0	0.0339527	0.567661	0	0	0.0202041	0.0071173	0	0.0011336	0.08	0.171903	1.04303
CGGA_1334	Pattern A	0.0369833	0	0.0285563	0.0645704	0	0.0382498	0	0.0515271	0	0	0.0087469	0.0479877	0.00962591	0	0.0316995	0.321926	0.151314	0	0	0.204305	0.00188947	0.00261899	0.43	0.043936	1.07881
CGGA_1338	Pattern A	0.0888332	0	0	0.0584181	0	0.00540099	0	0.0655438	0.0269487	0	0.0636972	0	0.000709056	0.274422	0.015509	0.23847	0	0	0	0.121922	0	0.0401251	0.08	0.174813	1.03764
CGGA_1339	Pattern A	0.0591884	0	0	0.0615555	0	0.0702908	0	0.00650002	0	0	0	0.0491663	0.129111	0	0.0408079	0.333344	0.0996123	0	0.123684	0.00219938	0	0.0245404	0.28	0.0693648	1.05621
CGGA_1359	Pattern A	0.0295618	0	0	0.0936358	0	0.0512116	0	0.0138178	0.0605752	0	0	0.0431155	0.00432614	0	0	0.525727	0	0.0200758	0.15614	0	0	0.00181284	0.32	0.0560865	1.0768
CGGA_1361	Pattern A	0	0.00239886	0.00542124	0.0229725	0	0.116187	0	0	0.0265503	0	0.00247521	0.00317857	0.0151584	0	0.00293384	0.618227	0.00969443	0.00210861	0.172694	0	0	0	0.15	0.132471	1.06003
CGGA_1362	Pattern A	0.0717745	0	0	0.0530117	0	0.10692	0	0.00234097	0.0128583	0	0.00817649	0.0241836	0.243609	0	0.0339572	0.315566	0	0	0.124551	0	0	0.00305145	0.05	0.233263	0.991748
CGGA_1374	Pattern A	0.101959	0	0.0412074	0.0428174	0	0.104892	0	0.0329524	0.0233406	0	0	0.0597152	0.0246623	0	0.166663	0.189253	0.0166751	0	0	0.194196	0	0.0016672	0.09	0.167505	1.03726
CGGA_1384	Pattern A	0.0311991	0	0	0	0	0.077225	0	0.000936582	0	0	0.00233838	0.0384222	0.258682	0	0	0.417899	0	0.000161325	0.122342	0.0507946	0	0	0.13	0.147401	1.04606
CGGA_1388	Pattern A	0.0196827	0	0	0.00501174	0	0.0920281	0	0.0196131	0	0	0	0.0459108	0.270105	0	0.0335728	0.411332	0	0	0	0.102744	0	0	0.04	0.262387	0.994995
CGGA_139	Pattern A	0.0879129	0	0	0	0	0.374532	0	0	0.0378639	0	0	0.0877631	0.0166502	0	0.0165927	0.325019	0	0	0	0.0309758	0.0226902	0	0.66	0.00999053	1.10262
CGGA_1391	Pattern A	0	0.0238328	0.0131721	0.0245044	0	0.0977082	0	0.0278647	0.0341117	0	0.0375723	0.0482465	0.0160641	0.0957651	0.0149598	0.408702	0	0.00573304	0.139158	0	0	0.0126062	0.3	0.0626671	1.06826
CGGA_1394	Pattern A	0.107564	0	0	0.00575703	0	0.11906	0	0	0.0740856	0	0.0176868	0.0338533	0	0	0.0125151	0.555438	0	0	0	0.0740406	0	0	0.31	0.0584731	1.08952
CGGA_1398	Pattern A	0	0.0584808	0.00836722	0	0	0.139629	0	0	0.0222926	0	0.00970193	0.0552465	0.128949	0	0.00547251	0.348235	0.0181974	0	0	0.205428	0	0	0.15	0.136728	1.04381
CGGA_1401	Pattern A	0	0	0.00019906	0	0	0.142336	0	0.0184957	0.0234239	0	0	0.0554	0.121442	0	0.00645068	0.132601	0.00353403	0	0	0.495008	0	0.00110946	0	0.391747	0.9412
CGGA_1406	Pattern A	0.0310801	0	0	0.0309634	0	0.0366354	0	0	0.000370601	0	0	0.0237659	0.30896	0	0.00403154	0.44309	0	0	0.11463	0	0.00647393	0	0	0.452596	0.893986
CGGA_1408	Pattern A	0.0282121	0	0	0.121854	0	0.00244915	0	0	0.0258296	0	0	0.034321	0.120046	0	0.0944031	0.460556	0.00702047	0	0.102849	0	0	0.00245904	0.05	0.237208	0.998958
CGGA_1409	Pattern A	0.0444551	0	0	0.0219533	0	0.0367914	0	0.041813	0	0	0	0.0421083	0.123268	0	0.00565896	0.249677	0.000969053	0	0	0.429675	0.00363129	0	0.02	0.272361	1.00357
CGGA_1412	Pattern A	0.00107857	0.0122874	0.0291338	0.141034	0	0.0719289	0	0.0329406	0.0670894	0	0	0.0216549	0	0	0.0342524	0.519616	0	0	0	0.0539626	0	0.0150207	0.09	0.166685	1.03468
CGGA_1415	Pattern A	0.0470742	0	0	0	0	0.101338	0	0.0130817	0.0254722	0.0141484	0	0	0.109593	0	0.00804624	0.309907	0	0.00742252	0	0.309979	0.00359896	0.0503388	0.29	0.0673559	1.0846
CGGA_1434	Pattern A	0.102231	0	0	0.0531765	0	0.0929684	0	0.0236223	0.0273434	0	0.0753697	0.00637415	0.180314	0	0.00655588	0.338811	0.000431367	0.00916628	0	0.049496	0	0.03414	0.62	0.0165302	1.08741
CGGA_1440	Pattern A	0	0.0367318	0.00941793	0	0.0412939	0.0640028	0	0	0.0866388	0	0.20236	0	0.0539415	0	0.0189938	0.18955	0.106891	0	0.168423	0	0.0101879	0.0115677	0.25	0.0811811	1.04487
CGGA_1450	Pattern A	0	0.111029	0.0371572	0.101114	0.15513	0	0	0	0	0	0.115177	0	0.00111531	0	0.0141564	0.443976	0	0	0.0211448	0	0	0	0.99	-0.0435055	1.11466
CGGA_1451	Pattern A	0.00466159	0.00544843	0.0089116	0.0399944	0	0.11098	0	0.0069012	0.0340828	0	0	0.0201632	0.0917324	0.14093	0.0201678	0.429975	0.0232127	0	0.0598481	0	0	0.00299022	0.16	0.124053	1.05878
CGGA_1452	Pattern A	0	0.0166281	0.00767284	0.0298685	0	0.107906	0	0.0295168	0	0	0.0800995	0.0395498	0.104036	0	0.000223207	0.327819	0	0.00435017	0	0.22933	0.00412413	0.0188763	0.22	0.0947917	1.06669
CGGA_1463	Pattern A	0.0336148	0	0	0	0	0.363879	0	0.026889	0.0931209	0	0.0205859	0.0671021	0.046639	0	0	0.205798	0.0211446	0.0312734	0.0530284	0	0.0369251	0	0.18	0.117212	1.05182
CGGA_1471	Pattern A	0.00702106	0	0	0.00457195	0	0.07883	0	0	0.00298934	0	0.00893574	0.0251561	0.230293	0	0	0.552684	0	0.00721527	0.0754361	0	0	0.00686734	0.04	0.254961	1.00795
CGGA_1476	Pattern A	0.00337804	0.0192614	0.000490175	0.0448586	0	0.154601	0	0	0.0924034	0	0.0952207	0.000840071	0.0349061	0	0.0206023	0.34926	0	0	0.164512	0	0.0100206	0.00964621	0.29	0.0654295	1.05552
CGGA_1480	Pattern A	0	0.0421906	0.00705137	0.0380579	0	0.131844	0	0.0363731	0	0	0	0.0554794	0.0795889	0	0.0031391	0.217074	0.00340189	0	0	0.353973	0.0192276	0.0125988	0.25	0.079678	1.08324
CGGA_1487	Pattern A	0.216215	0	0	0	0	0.110446	0	0	0.105527	0	0.0907533	0	0.0235787	0.110731	0	0.131238	0	0.0168338	0.192838	0	0	0.00183948	0.8	-0.0104039	1.07942
CGGA_1507	Pattern A	0.042683	0	0.0122234	0.0455023	0	0.0692177	0	0.0604844	0	0	0	0.0538063	0.0656968	0	0.0154404	0.389876	0.0130277	0	0	0.223547	0.00703851	0.00145635	0.12	0.156329	1.03832
CGGA_1516	Pattern A	0	0.13896	0.0141574	0	0.00537399	0.0656698	0	0.0273682	0	0	0	0.0652682	0.0929599	0	0.0103001	0.351069	0	0	0	0.228873	0	0	0.15	0.135673	1.04594
CGGA_1517	Pattern A	0.0335935	0	0	0.0298821	0	0.0503938	0	0.0380774	0	0	0.0411178	0.0262024	0.253653	0	0.00242448	0.373074	0.0713886	0	0.0489594	0.0312335	0	0	0.3	0.0613851	1.07915
CGGA_1518	Pattern A	0.0834578	0	0	0	0	0.0787821	0	0.0359754	0.0665231	0	0.0918998	0	0.00067137	0.23517	0	0.330247	0	0.0238831	0.0533897	0	0	0	0.56	0.0259687	1.09928
CGGA_1523	Pattern A	0	0.0131956	0.00111586	0.0254752	0	0.203818	0	0.00863183	0.0351555	0	0.144774	0.00332284	0.0621909	0	0.106028	0.257161	0.0451673	0	0.0907496	0	0.00321456	0	0.28	0.0680196	1.06294
CGGA_1524	Pattern A	0.00599539	0	0.00733029	0.0370688	0	0.0282613	0	0.0575419	0	0	0	0.0541934	0.178762	0	0.0299265	0.13809	0.0677617	0	0	0.395069	0	0	0.05	0.249017	1.00856
CGGA_1527	Pattern A	0.0525175	0	0.00666932	0.0529071	0	0.0640992	0	0.00337721	0.00417886	0	0.010257	0.0494453	0.122141	0	0.0113491	0.203137	0.0991672	0	0	0.309758	0.00205282	0.00894329	0	0.356364	0.942192
CGGA_1537	Pattern A	0.045814	0	0	0.0732197	0	0.0996778	0	0.0267375	0.0375818	0	0.0586307	0.0103998	0.0214115	0	0.0130775	0.497843	0.00749622	0	0.0922909	0	0	0.0158201	0.2	0.106434	1.05359
CGGA_1541	Pattern A	0	0.0489258	0.00747293	0.0337684	0	0.0442593	0	0.0436244	0	0	0	0.0555221	0.256006	0	0	0.41287	0	0.00513445	0.0330061	0.0594102	0	0	0.24	0.0860192	1.07332
CGGA_1544	Pattern A	0	0.0854166	0.0144537	0.0160052	0	0.0734554	0	0.0267656	0	0	0	0.0454044	0.197838	0	0.00610708	0.382332	0	0	0.0160845	0.136138	0	0	0.21	0.0980174	1.06082
CGGA_1548	Pattern A	0.0430485	0	0.0441776	0.124162	0	0	0	0.0662594	0	0.0151659	0	0.0135732	0	0.213264	0.023362	0.437966	0	0	0	0.0190215	0	0	0.07	0.184573	1.03899
CGGA_1552	Pattern A	0	0.0363403	0.0180802	0	0.0646362	0.0247975	0	0.0645456	0	0	0.01882	0.0753969	0.153088	0	0.00816849	0.294869	0.0864149	0	0	0.154843	0	0	0.16	0.126799	1.04212
CGGA_1553	Pattern A	0.0137591	0	0.00165709	0.0050916	0.00268323	0.0357807	0	0.0274899	0	0	0	0.0379362	0.193386	0	0.00419238	0.154354	0.0584824	0	0	0.465187	0	0	0.03	0.265722	1.01339
CGGA_1559	Pattern A	0.0383637	0	0.0664412	0.0261196	0	0.0332118	0.0210236	0.0153766	0	0	0	0.0724639	0.114201	0	0.0280691	0.449186	0.0320948	0	0	0.0905211	0	0.0129273	0.05	0.223654	1.0061
CGGA_1562	Pattern A	0	0.0600588	0.00380759	0.00275588	0	0.0555604	0	0.110552	0	0	0	0.0541173	0.0772725	0	0	0.226789	0	0	0	0.409086	0	0	0	0.335419	0.96264
CGGA_1563	Pattern A	0.10958	0	0.0625361	0.140871	0	0.11561	0	0.0120926	0	0	0	0.0276297	0.0202868	0	0.0167091	0.351402	0.0617333	0	0	0.0767378	0	0.00481222	0.05	0.235893	0.98989
CGGA_1580	Pattern A	0.0504464	0	0	0.0370458	0	0.0850554	0	0.00919307	0	0	0	0.0734675	0.0605451	0	0.00610676	0.378565	0.0681528	0	0	0.215533	0	0.0158886	0.04	0.256121	0.993374
CGGA_1589	Pattern A	0	0	0	0.0542066	0	0.319787	0	0.00473937	0.0260317	0	0	0.11238	0.096911	0	0.00297966	0.203247	0	0.00194808	0.119845	0	0.0126662	0.0452593	0.6	0.0190856	1.09181
CGGA_1596	Pattern A	0.0258292	0	0	0.0713456	0	0.0408354	0	0.0424162	0.0501617	0	0.0313212	0.0192515	0.00568871	0.134565	0	0.522909	0	0.00991007	0.0391724	0	0	0.00659305	0.05	0.250005	1.00523
CGGA_1597	Pattern A	0.0621208	0	0.0334908	0.0822402	0	0	0	0.00367845	0.00671332	0	0	0.0116661	0.168836	0	0.0155534	0.487026	0.0730873	0	0.0531696	0	0	0.00241747	0.15	0.133702	1.05275
CGGA_1607	Pattern A	0.0571396	0	0.00239002	0	0	0.0726398	0	0.00504885	0.0402816	0	0	0.0150255	0.00874449	0.112332	0.021702	0.503888	0	0	0	0.13589	0	0.0249184	0.2	0.110733	1.07926
CGGA_1608	Pattern A	0.0535603	0	0.0208166	0.347326	0	0.0533943	0.0317169	0.0713041	0	0	0	0.0620787	0.0137998	0	0.0663761	0.189074	0.0383359	0	0	0.0504336	0	0.00178349	0	0.340504	0.9526
CGGA_1611	Pattern A	0	0.0511522	0.0423088	0.0284105	0	0.18372	0	0	0.0189798	0	0.0190693	0.0456112	0.0162236	0	0.027073	0.442478	0.0104705	0.00437361	0.1035	0.00662885	0	0	0.31	0.0573214	1.06457
CGGA_1619	Pattern A	0	0.0589339	0.0337923	0.0829635	0	0.0314357	0	0.0425466	0	0	0	0.0669609	0.110166	0	0.0259335	0.331286	0.0145933	0	0	0.201388	0	0	0.26	0.0724797	1.06897
CGGA_1623	Pattern A	0.0421526	0	0	0	0	0.16645	0	0.0133327	0.00963627	0	0.00397256	0.0633307	0.136955	0	0.0627131	0.361275	0.00891666	0	0	0.131121	0	0.000144251	0.47	0.0376586	1.08542
CGGA_1626	Pattern A	0.0146385	0	0	0.0644621	0	0.08346	0	0.00836987	0.0462222	0	0.0803086	0	0.101737	0	0.00829392	0.532433	0	0.000788504	0	0.015784	0.0143695	0.0291326	0.21	0.0962331	1.07358
CGGA_1631	Pattern A	0.0484696	0	0.0365474	0.121598	0	0	0	0.0176886	0.0212313	0	0.0162626	0.0278848	0	0	0.0372639	0.640088	0	0	0.0212409	0.00619249	0	0.00553309	0	0.41262	0.916833
CGGA_1634	Pattern A	0.0805423	0	0.0150446	0.0935905	0	0	0	0.112813	0.0320309	0	0	0.0726909	0	0.155058	0.12568	0.252749	0	0	0	0.0554714	0	0.00432973	0.01	0.298608	0.971217
CGGA_1644	Pattern A	0	0.0436314	0.0261755	0.0763076	0	0.0288778	0	0.00941524	0.0294736	0	0	0.0645008	0.0027681	0	0.0119378	0.588084	0	0.00675083	0.101652	0	0	0.0104254	0.48	0.0365066	1.09733
CGGA_1650	Pattern A	0.0491708	0	0	0.0127446	0	0.064734	0	0	0	0	0	0.0170475	0.22283	0	0.0117655	0.343723	0.0603871	0	0.199	0	0	0.0185975	0.01	0.298109	0.965835
CGGA_1667	Pattern A	0	0.011126	0.00030881	0	0.00788776	0.0998342	0	0.0181783	0	0	0	0.108292	0.046361	0	0.00331749	0.147222	0.108512	0	0	0.30415	0	0.144811	0.08	0.173611	1.04701
CGGA_1670	Pattern A	0.0774609	0	0.0113355	0.0675934	0	0.0197016	0	0.0209459	0.020523	0.00965571	0	0.0571491	0	0.191924	0.0272812	0.453069	0	0	0	0.0433605	0	0	0.01	0.292148	0.984762
CGGA_1673	Pattern A	0.0679737	0	0	0	0	0.343293	0	0	0.0564931	0	0.104371	0	0.047773	0	0	0.282076	0	0.0303119	0.0640406	0	0.00366853	0	0.66	0.0088301	1.08966
CGGA_1680	Pattern A	0.0261373	0	0.0341157	0.0514193	0	0.0507018	0	0.00538089	0	0	0	0.0231233	0.11208	0	0.0228244	0.597877	0	0	0.0756054	0.0007342	0	0	0.05	0.222686	1.01759
CGGA_1688	Pattern A	0.101174	0	0	0.0547198	0	0.139264	0	0.0768852	0.0709545	0	0.0084165	0.0934982	0.021243	0	0.00410464	0.392595	0	0	0.0207358	0.0164095	0	0	0.63	0.0150223	1.09747
CGGA_1689	Pattern A	0	0.0216898	1.82342e-05	0	0	0.141738	0	0	0.0654098	0	0.0443167	0.0213289	0.271314	0	0.00316825	0.278343	0	0	0.149889	0	0	0.00278494	0.06	0.217424	0.998995
CGGA_1697	Pattern A	0.0429419	0	0	0.0429468	0	0.0607388	0	0.0650255	0	0	0	0.0857473	0.245462	0	0	0.364154	0	0	0.0346672	0.0583168	0	0	0.23	0.0902863	1.0666
CGGA_1718	Pattern A	0	0.0210892	0.0142225	0.0513547	0	0.105546	0	0.00812319	0.110511	0	0.119316	0	0.0481663	0	0	0.41987	0.00267062	0.0250666	0.0549904	0	0	0.0190731	0.17	0.119542	1.04468
CGGA_1723	Pattern A	0	0.090952	0.0120973	0.050919	0.00309855	0	0	0.0493797	0	0	0.0109256	0.0342716	0.268196	0	0.00534385	0.459001	0	0	0.0158154	0	0	0	0.17	0.121312	1.06369
CGGA_1736	Pattern A	0.0255655	0	0.00469204	0.081811	0	0.0932941	0	0	0	0	0	0.0293379	0.164902	0	0.00798632	0.512142	0.00623723	0	0.0740323	0	0	0	0.05	0.224193	1.00978
CGGA_1739	Pattern A	0	0.0183211	0.00813452	0.0506176	0.00944712	0.00435013	0	0.00865079	0	0	0.0199054	0.0157604	0.124944	0	0.0038384	0.338627	0.0254031	0	0	0.363965	0	0.00803542	0.21	0.0971123	1.08867
CGGA_1740	Pattern A	0.00875569	0.028116	0	0.203753	0.0392032	0	0	0.1639	0	0	0.032098	0.0770777	0	0	0.019606	0.39561	0	0	0	0.0318809	0	0	0.79	-0.00700919	1.11968
CGGA_1750	Pattern A	0	0	0	0.00410934	0	0.0601514	0	0.0218557	0.00125093	0	0	0.0476457	0.195343	0	0.011436	0.171605	0.0618242	0	0	0.424778	0	0	0.05	0.242344	1.02077
CGGA_1764	Pattern A	0.0168102	0	0.0338501	0.0788884	0	0.0658527	0	0.0325082	0	0	0.0553183	0.045218	0.0328342	0	0.0342317	0.482511	0.055868	0	0	0.037501	0	0.028608	0.17	0.120534	1.05343
CGGA_1769	Pattern A	0.037405	0	0	0.18162	0	0.0790372	0	0	0.115663	0	0.0644855	0	0.0551571	0.0797295	0.0141768	0.0179006	0.157488	0	0.167174	0	0.0122758	0.0178878	0.65	0.0120306	1.07077
CGGA_1776	Pattern A	0.0996055	0	0	0.0501248	0	0.191583	0	0	0.0215819	0	0	0.0443589	0.0503863	0	0.00267008	0.498283	0.00172518	0.000583051	0	0.0390985	0	0	0.51	0.0325396	1.09449
CGGA_1786	Pattern A	0	0.151297	0.0274467	0.0546488	0.0235243	0	0	0.0211337	0	0	0.0738272	0.0234613	0.061935	0	0.00790834	0.457108	0.0311189	0	0.0204026	0.023718	0	0.0224696	0.69	0.00505035	1.09549
CGGA_1809	Pattern A	0.0344942	0	0.00138662	0.0278368	0	0.0690659	0	0.0464413	0	0.0242978	0	0.0478823	0.263105	0	0.00215831	0.32599	0	0.0104929	0	0.143584	0	0.00326522	0.21	0.0961081	1.06629
CGGA_1840	Pattern A	0.100801	0	0	0.0176187	0	0.104509	0	0	0	0	0	0.0819394	0.0369798	0	0.00843791	0.460854	0	0	0	0.160955	0	0.0279063	0.22	0.0942685	1.07251
CGGA_1850	Pattern A	0.0605762	0	0	0.0492672	0	0.137528	0	0	0.0948921	0	0.0237583	0.00976039	0.126176	0	0.00590496	0.254843	0.0439142	0.00225978	0.179007	0	0	0.0121128	0.05	0.222266	0.988307
CGGA_1865	Pattern A	0.014209	0	0	0.0644699	0	0.146008	0	0.0154054	0.0676788	0	0.056859	0.0410975	0.0337958	0.0183484	0.0106352	0.456714	0	0	0.0666485	0	0	0.00813048	0.41	0.0482168	1.08233
CGGA_1870	Pattern A	0	0.117648	0.00898108	0.000331876	0.136519	0	0	0.107432	0	0	0	0.0740302	0.105462	0	0	0.407599	0	0	0	0.0419973	0	0	0.64	0.013432	1.09173
CGGA_1886	Pattern A	0	0.0633427	0.0267097	0	0	0.131746	0	0	0.0304575	0	0.00164439	0.106855	0.0457579	0	0	0.48729	0	0.00572235	0	0.0908252	0.00964971	0	0.21	0.0973742	1.06849
CGGA_194	Pattern A	0	0.0834258	0	0.0680386	0	0.0418234	0	0.00100954	0.00808872	0	0.0275648	0.00943316	0.185227	0	0.0248838	0.376333	0	0	0.00991164	0.164261	0	0	0.24	0.0846147	1.06635
CGGA_1972	Pattern A	0.0523605	0	0.0140728	0.0276226	0	0.0590061	0	0	0.00688399	0	0.00916081	0.00245635	0.112356	0.0892448	0.022845	0.408796	0.0233735	0	0.144891	0	0	0.0269305	0.29	0.0648444	1.07412
CGGA_1976	Pattern A	0.0103512	0	0	0.0252589	0	0	0	0.0431925	0.0434266	0	0	0.019099	0	0.419332	0.037554	0.363728	0	0	0.0321097	0	0	0.00594793	0	0.65371	0.756681
CGGA_1985	Pattern A	0	0.0362813	0.0218633	0.0137608	0.0292419	0.0548817	0	0.00625321	0	0	0	0.0642933	0.0313167	0	0.00525684	0.459865	0.214312	0	0	0.0626735	0	0	0.05	0.226626	1.00841
CGGA_2002	Pattern A	0.0932553	0	0	0.0299046	0	0.122103	0	0	0.0171694	0	0.0458687	0.0263466	0.0441698	0	0.0106545	0.30891	0.081622	0	0.198249	0	0	0.0217479	0.15	0.132225	1.02217
CGGA_2046	Pattern A	0.0509536	0	0.0087326	0.0871704	0	0.0710238	0	0	0	0	0	0.0202481	0.162768	0	0.0279916	0.334247	0.165029	0	0.0328434	0.034393	0	0.00459918	0.06	0.207755	1.00489
CGGA_2047	Pattern A	0.0200949	0	0.00399898	0.0515801	0	0.0446087	0	0.036016	0.00512082	0	0	0.0298226	0.101232	0	0.0112558	0.402159	0	0	0	0.252046	0.040479	0.00158659	0	0.363997	0.94047
CGGA_2056	Pattern A	0.00754014	0	0	0.0551843	0	0.0114449	0.00903759	0.0156319	0	0.074575	0	0.00714739	0.00689812	0.126433	0.0152677	0.600403	0	0	0.0619685	0	0	0.00846776	0	0.476664	0.882829
CGGA_2075	Pattern A	0.00971685	0	0.00722449	0.0288118	0	0.110227	0	0.0348483	0.0552285	0	0	0.0622506	0.00770469	0.0449014	0.0057373	0.422671	0	0.0260608	0.156794	0	0	0.0278228	0.43	0.044707	1.07234
CGGA_2079	Pattern A	0.000830367	0	0.0155024	0.0184534	0	0.0388681	0	0.107953	0	0	0	0.101769	0.0344417	0	0.0563111	0.489928	0.0695755	0	0	0.0656322	0	0.000735493	0.25	0.0815383	1.07923
CGGA_2081	Pattern A	0.0842688	0	0	0.086203	0	0.256597	0	0	0.0997215	0	0.0756222	0.0258116	0.0204242	0	0	0.294575	0	0.00779917	0.0367161	0	0	0.0122611	0.13	0.147852	1.03982
CGGA_2082	Pattern A	0.0358053	0	0	0.0277201	0	0.046949	0	0	0.0313311	0	0	0.0302356	0.126851	0	0.00553608	0.509881	0.0125373	0.00223119	0.148911	0	0.000262703	0.0217491	0.08	0.175827	1.03015
CGGA_2115	Pattern A	0.0511159	0	0	0.153862	0	0.0182355	0	0.0145943	0	0	0	0.026009	0.0856459	0	0.000652451	0.526262	0.00719097	0	0.0827811	0	0	0.0336508	0.17	0.121901	1.0556
CGGA_2121	Pattern A	0.0530911	0	0	0.0383726	0	0.014873	0	0.0187512	0.0262507	0	0	0.0336077	0	0.210978	0.0326728	0.379854	0	0	0	0.189596	0	0.00195241	0	0.492608	0.871453
CGGA_2129	Pattern A	0.111447	0	0	0.0221482	0	0.0727444	0	0	0.0148381	0	0	0.0646252	0.142547	0	0.0291437	0.360904	0.109566	0	0.0720362	0	0	0	0.18	0.116803	1.0428
CGGA_243	Pattern A	0.049948	0	0	0	0.0440003	0	0	0.0895315	0	0	0	0.058815	0.0731974	0	0.00412973	0.326808	0.0449586	0	0	0.305905	0.00270581	0	0.17	0.120131	1.06365
CGGA_245	Pattern A	0.0252847	0	0.0312394	0.0651389	0	0.0171702	0	0.0132712	0	0	0	0.036298	0.138417	0	0.0085092	0.37508	0.0352373	0	0	0.247944	0.000982344	0.00542818	0.05	0.225055	1.01059
CGGA_251	Pattern A	0.0275123	0	0.0190864	0.00145429	0.0650125	0.0225364	0	0.0355579	0	0	0	0.0917023	0.132483	0	0.0292869	0.23847	0.130741	0	0	0.198433	0	0.00772308	0.07	0.187467	1.0178
CGGA_252	Pattern A	0	0.0246819	0.00879439	0	0	0.175583	0	0	0.0828689	0	0.0886374	0	0.0869218	0	0	0.351597	0.021653	0.0016964	0.138849	0	0.00374828	0.0149694	0.09	0.166917	1.01521
CGGA_254	Pattern A	0	0	0.000893821	0	0	0.140843	0	0	0.0687394	0	0.0416914	0.0730744	0.17926	0	0	0.32383	0.0274818	0	0	0.100793	0.00225519	0.041137	0.24	0.0848849	1.06861
CGGA_265	Pattern A	0.085277	0	0	0	0	0.149182	0	0	0	0	0	0.0874203	0.19806	0	0.0231337	0.310686	0.0134355	0	0	0.126078	0	0.00672847	0.05	0.243355	0.993791
CGGA_267	Pattern A	0	0.167313	0	0.0276524	0.179623	0	0	0	0	0	0.0671213	0	0.117558	0	0.000296035	0.373428	0	0	0	0.0670085	0	0	0.65	0.0124425	1.08582
CGGA_273	Pattern A	0	0.000415698	0.00431685	0	0	0.12389	0	0.00841227	0.00542718	0	0	0.0539037	0.0428849	0	0	0.105575	0.0537727	0.00624392	0	0.560567	0.00870892	0.0258808	0	0.578784	0.817091
CGGA_276	Pattern A	0	0.052106	4.82522e-05	0	0.0487338	0.101274	0	0	0	0	0.00736997	0.0328067	0.246596	0	0.00640714	0.368854	0	0	0.133552	0.00225201	0	0	0.23	0.0900034	1.05859
CGGA_279	Pattern A	0	0.0273232	0.0100787	0.0141459	0.00107785	0.0224693	0	0.0267498	0	0	0	0.0498573	0.00729447	0	0	0.316862	0	0.000910423	0	0.519377	0.00197957	0.00187484	0	0.511378	0.867972
CGGA_288	Pattern A	0.0261372	0	0.000946477	0.052695	0	0	0	0.0208676	0.0138456	0	0	0.025256	0.0168417	0.274693	0.0192628	0.439254	0	0	0	0.1102	0	0	0	0.550824	0.835275
CGGA_290	Pattern A	0	0	0	0	0	0.183126	0	0	0	0	0.00302775	0.0305045	0.0456079	0	0.00519634	0.218101	0.117268	0	0	0.291562	0	0.105607	0.13	0.144599	1.04619
CGGA_300	Pattern A	0	0.0239167	0.00561919	0	0	0.194275	0	0	0.0296909	0	0.0191711	0.120323	0.216358	0	0	0.151313	0	0	0	0.217943	0	0.0213891	0.26	0.0703176	1.08494
CGGA_314	Pattern A	0.0617038	0	0	0	0	0.0749214	0	0	0	0	0	0.0347103	0.191753	0	0.00837072	0.404292	0	0	0.189388	0.0335929	0	0.00126857	0.08	0.1729	1.02337
CGGA_318	Pattern A	0	0.00374073	0.00498335	0.024421	0	0.0612463	0	0.0102131	0.0633853	0	0.136301	0	0.0742927	0.146883	0.00428608	0.0611399	0	0	0	0.125725	0.0901508	0.193232	0.24	0.085661	1.0832
CGGA_320	Pattern A	0	0.00285093	0	0.0178816	0	0.101761	0	0.0184722	0.0105906	0	0	0.0381245	0.117714	0	0.0030555	0.0876999	0.0883241	0	0	0.489764	0	0.0237609	0.09	0.160559	1.06984
CGGA_330	Pattern A	0.016163	0	0.00126809	0.0225328	0	0.074935	0	0.0255298	0	0	0	0.0221751	0.145819	0	0.0289729	0.352973	0.046642	0	0	0.236965	0.00870363	0.0173206	0.08	0.172513	1.03394
CGGA_333	Pattern A	0	0.0246028	0.00921647	0.0372885	0.00611266	0.0455477	0	0.00638708	0	0	0	0.0458478	0.0348193	0	0.0239265	0.232291	0.192758	0	0	0.306137	0	0.0350659	0.01	0.285357	0.979227
CGGA_336	Pattern A	0	0.014471	0.035336	0.0541607	0	0.126244	0	0.00908535	0	0	0	0.0757565	0.0280704	0	0.115166	0.217901	0.141414	0	0	0.172065	0.0103303	0	0.3	0.0641489	1.07195
CGGA_337	Pattern A	0.0718901	0	0.0498785	0.0424008	0	0.0663551	0	0.0220261	0.00599678	0	0	0.0949956	0.14084	0	0.0224406	0.333909	0.0620969	0	0	0.0843784	0	0.00279184	0.21	0.0962016	1.0538
CGGA_413	Pattern A	0.0220665	0	0.00431963	0.0544126	0	0.129306	0	0.0164341	0.0798162	0	0.0770839	0	0.0179505	0.0936123	0	0.406254	0	0.0168742	0.0578882	0	0	0.0239821	0.16	0.128496	1.04517
CGGA_42	Pattern A	0.0338328	0	0	0.0446081	0	0.0842968	0	0.0144788	0.0106237	0	0.0494953	0.0671041	0.0355671	0	0.00608452	0.427362	0.122597	0	0	0.0896457	0	0.0143037	0.12	0.156459	1.03759
CGGA_426	Pattern A	0.0943964	0	0.0233752	0.0412091	0	0.0968579	0	0	0.0273271	0	0.0709187	0	0.060811	0.00282473	0.0217898	0.421232	0	0.00491609	0.0231584	0.0528181	0	0.0583662	0.44	0.0424011	1.07588
CGGA_431	Pattern A	0	0.0284896	0.0606872	0.0421114	0.0565287	0	0	0.0473388	0	0	0	0.0873953	0.0279686	0	0.00805356	0.411896	0.127844	0	0	0.101687	0	0	0.89	-0.0236094	1.10962
CGGA_446	Pattern A	0	0.131761	0.0378465	0	0.00830215	0.0365156	0	0.0399828	0	0	0.0217726	0.0133284	0.129011	0	0	0.388711	0	0.00638902	0.0634381	0	0	0.122942	0.58	0.023051	1.09314
CGGA_448	Pattern A	0.107041	0	0	0.0197739	0	0.0912815	0	0.0187295	0.0347471	0	0.00869739	0.0479481	0.122927	0.00154933	0.00937172	0.289466	0	0	0	0.189698	0.0423703	0.0163994	0.13	0.149803	1.03204
CGGA_458	Pattern A	0	0.0277049	0.00393213	0.0176523	0	0.102189	0	0	0.0214652	0	0.0325927	0.00261857	0.190491	0	0.00219271	0.518059	0	0	0.0517904	0.0293123	0	0	0.08	0.171213	1.03919
CGGA_479	Pattern A	0.000679305	0.0190141	0	0.022273	0.0419938	0	0	0.0348878	0	0	0	0.0641355	0.172562	0	0.023934	0.417404	0.0220039	0	0	0.154132	0	0.0269807	0.07	0.180691	1.03419
CGGA_482	Pattern A	0.0686677	0	0	0.0720437	0	0.0747445	0	0.00456472	0	0	0	0.0619631	0.0739139	0	0.0415438	0.430422	0.0300639	0	0	0.119255	0.00186596	0.0209515	0.06	0.193671	1.01942
CGGA_485	Pattern A	0.00156887	0.033388	0.00076669	0	0	0.211033	0	0	0.0513525	0	0.101527	0	0.0577745	0	0.0013634	0.444758	0	0.00238818	0	0.0600003	0.00667439	0.0274057	0.11	0.157227	1.03341
CGGA_490	Pattern A	0.0330046	0	0	0	0	0.124876	0	0	0.0470257	0	0	0.0758991	0.10246	0	0	0.214362	0.0508567	0	0	0.277143	0	0.0743729	0.09	0.160329	1.03979
CGGA_491	Pattern A	0.0153394	0	0	0	0	0.173319	0	0	0.0137297	0	0	0.0781846	0.221598	0	0.00145782	0.375756	0	0	0	0.119645	0	0.000970543	0.16	0.128375	1.05413
CGGA_493	Pattern A	0	0.0054689	0.00464992	0	0	0.130585	0	0.0126738	0.0141118	0	0.000887587	0.0402218	0.0580832	0	0	0.0348422	0.107803	0	0	0.590673	0	0	0	0.493325	0.881982
CGGA_501	Pattern A	0	0.0401405	0.00885113	0.0464312	0.0603341	0	0	0.00836762	0	0	0.00476578	0.0283174	0.0222682	0	0.00649638	0.332963	0.139394	0	0	0.294181	0.00748964	0	0.07	0.183038	1.03013
CGGA_502	Pattern A	0	0.0282674	0.00572585	0.0252635	0	0.120922	0	0	0.0334969	0	0.0204857	0.0174838	0.273617	0	0	0.320124	0	0.00605252	0.148562	0	0	0	0.07	0.188425	1.01372
CGGA_503	Pattern A	0.00752702	0	0.00216612	0.0514933	0	0.165585	0	0	0.0595389	0	0	0.0854833	0.0543455	0	0.00411263	0.0472245	0.131732	0	0	0.352437	0.0258525	0.0125024	0.07	0.189549	1.03319
CGGA_507	Pattern A	0	0.0458291	0.0192417	0	0	0.224261	0	0	0.0291303	0	0.0294604	0.0439793	0.115145	0	0	0.208455	0	0.0128664	0	0.241327	0	0.0303048	0.47	0.0371467	1.08105
CGGA_510	Pattern A	0	0.0486132	0.017391	0.0675351	0.0263997	0.0391992	0	0.0260891	0.00129791	0	0	0.0713374	0.0239464	0	0.0125336	0.513391	0.1215	0	0	0.0307666	0	0	0.21	0.099321	1.06877
CGGA_518	Pattern A	0	0	0.131482	0.0405609	0.133515	0	0	0.0321258	0	0	0	0.0722963	0.0698541	0	0.0060716	0.389723	0.0241102	0	0	0.100261	0	0	0.99	-0.0499686	1.11316
CGGA_551	Pattern A	0	0.109638	0.0371192	0.0226592	0.00586699	0.0574106	0	0	0.0625764	0	0.0429478	0.0531554	0.0999989	0	0	0.28089	0	0	0	0.143151	0	0.0845868	0.3	0.061775	1.06738
CGGA_560	Pattern A	0	0.0687775	0.0449349	0	0.0729329	0.17106	0	0.0308423	0.0152991	0	0.0186201	0.101803	0.0423603	0	0.016645	0.307989	0.0118916	0	0.0832428	0	0	0.0136022	0.79	-0.00907823	1.08761
CGGA_564	Pattern A	0.00493474	0.0391115	0	0	0	0.218297	0	0	0.0241508	0	0.00286708	0.0817677	0.215944	0	0.0202552	0.23284	0.00324382	0.00391769	0.135666	0	0	0.0170048	0.19	0.112729	1.03871
CGGA_578	Pattern A	0.0497733	0	0.0186499	0.25558	0	0	0	0.0279762	0	0	0	0.0638434	0	0	0.0909285	0.435352	0.0477933	0	0.0101038	0	0	0	0.31	0.057479	1.08493
CGGA_580	Pattern A	0.101923	0	0	0.0561569	0	0.0643667	0	0	0.0416821	0	0.0114857	0.0355135	0.0365927	0	0.00945267	0.23702	0.0442813	0	0	0.339301	0.00871467	0.01351	0.05	0.242375	1.00075
CGGA_591	Pattern A	0	0.0366345	0.00549356	0.0436745	0.0346638	0	0	0.0766099	0	0	0	0.124597	0.119739	0	0.00981879	0.290387	0.0366814	0	0	0.188679	0.0143692	0.0186516	0.01	0.288043	0.976316
CGGA_598	Pattern A	0	0.0744467	0.0188915	0.109088	0.0114287	0.0156904	0	0	0.0484982	0	0.13978	0	0.0430405	0	0.00791525	0.441652	0.00758076	0	0	0.0374555	0.00502344	0.0395087	0.21	0.0982335	1.05952
CGGA_599	Pattern A	0.0246387	0	0	0.0466952	0	0.0540756	0	0	0	0	0	0.0586701	0.151306	0	0.0452405	0.441677	0	0	0.124031	0.0204486	0	0.0332173	0.11	0.1587	1.03428
CGGA_601	Pattern A	0	0.0869135	0	0.0266882	0.177817	0	0	0.0398287	0	0	0	0.0830132	0.110448	0	0.0059271	0.310841	0	0	0.143274	0	0	0.0152492	0.59	0.0201467	1.07205
CGGA_603	Pattern A	0.0729327	0	0.014054	0.0367287	0	0.0146239	0	0	0	0	0.00398679	0.00819845	0.148062	0	0.00273188	0.572573	0	0	0.126109	0	0	0	0	0.347529	0.952614
CGGA_605	Pattern A	0.0347751	0	0.00768547	0.047562	0	0.00105963	0	0	0.00373803	0	0	0.0158346	0.0582521	0.000946845	0.00433318	0.668672	0	0	0	0.129401	0	0.0277399	0	0.519563	0.85621
CGGA_607	Pattern A	0	0.0153213	0	0	0	0.0708511	0	0.00507113	0	0	0	0.052584	0.207716	0	0.0565422	0.388435	0	0	0.166357	0.0304617	0	0.00666033	0.07	0.185563	1.02011
CGGA_616	Pattern A	0	0.075732	0.00954406	0	0.00118581	0.173344	0	0.0938893	0	0	0.0411759	0.0478385	0.110155	0	0.00606954	0.256741	0.0128616	0.00301107	0	0.0946386	0.0381244	0.0356888	0.61	0.0177213	1.07815
CGGA_619	Pattern A	0.0428145	0	0	0.0750379	0	0.0441036	0	0.00653367	0	0	0	0.0489824	0.19666	0	0	0.450833	0	0	0.111647	0	0	0.0233869	0.1	0.159563	1.03642
CGGA_630	Pattern A	0	0.0540963	0.0165675	0	0.0569116	0.012998	0	0.00572804	0	0	0.00938974	0.0239925	0.033932	0	0.0216145	0.167304	0.0438299	0	0	0.553187	0.000448513	0	0.05	0.238266	1.04173
CGGA_632	Pattern A	0	0.0102676	0.0256831	0.0446535	0	0.0943053	0	0.0091369	0	0	0	0.0596309	0.0132676	0	0.0325033	0.447779	0.0765186	0	0	0.166457	0	0.0197976	0.08	0.178168	1.03049
CGGA_634	Pattern A	0.00804143	0	0.00411398	0.0085023	0	0.239677	0	0.00524316	0.00326905	0	0	0.0873731	0.0419475	0	0.0052982	0.00870272	0.037966	0	0	0.534374	0.000967504	0.0145247	0.02	0.272418	1.0281
CGGA_635	Pattern A	0	0.00426201	0.00918075	0.0297678	0	0.140073	0	0.0213921	0.0666833	0	0.0628276	0.0107226	0.0449565	0	0	0.504299	0.0413577	0.00237849	0	0.0368772	0.0252218	0	0.2	0.105317	1.06239
CGGA_638	Pattern A	0.00493277	0.00250749	0	0.0373909	0	0.0427101	0	0.0390896	0	0	0	0.0568225	0.0260969	0	0.0173797	0.492673	0.18028	0	0.0834882	0.0166297	0	0	0.05	0.251412	0.995776
CGGA_641	Pattern A	0.0985257	0	0	0.038933	0	0.156127	0	0	0.04182	0	0.0685069	0.0335074	0.0322159	0	0.00929694	0.291584	0.0882144	0	0	0.0714322	0.00283175	0.0670047	0.64	0.0139876	1.08213
CGGA_662	Pattern A	0	0.00278373	0.00331042	0.023041	0.042778	0.031274	0	0	0	0	0.03251	0.0450508	0.155043	0	0.0105246	0.442964	0.0795608	0	0.0345817	0.0444776	0	0.0520999	0.12	0.152022	1.04568
CGGA_663	Pattern A	0	0.0579992	0.0339669	0	0	0.324404	0	0	0	0	0.0850999	0.0251972	0.0404163	0	0	0.220225	0	0.00811524	0	0.132676	0	0.0719005	0.3	0.0603518	1.06725
CGGA_666	Pattern A	0.0974646	0	0	0	0.0192864	0.110925	0	0.0123253	0.0537613	0	0.082352	0.0403061	0.0402917	0	0.0140632	0.46941	0.0133655	0	0.0336208	0	0.0128284	0	0.22	0.0929015	1.06088
CGGA_671	Pattern A	0.0355694	0	0	0.00259871	0.0828698	0.13855	0	0	0.0486798	0	0	0.115766	0.0584553	0	0.00481944	0.170828	0.023594	0	0	0.315358	0	0.00291146	0.53	0.0307705	1.11248
CGGA_675	Pattern A	0.0180546	0	0	0.0615485	0	0.146339	0	0	0.00678557	0	0.00841774	0.0489117	0.0331361	0	0	0.324374	0.0402679	0	0	0.282602	0.0240851	0.00547824	0.05	0.22174	1.01126
CGGA_680	Pattern A	0.0350714	0	0.0246758	0.0196598	0	0.0826214	0	0.0502358	0	0.0330834	0	0.123191	0.134698	0	0.0320464	0.36523	0	0	0.0214844	0.078002	0	0	0.42	0.0462541	1.08442
CGGA_689	Pattern A	0	0.034803	0.053911	0	0.0361369	0	0	0.0693085	0.040552	0	0	0.060951	0.0222612	0	0.0569941	0.378719	0.165642	0	0	0.0807207	0	0	0.54	0.0286405	1.08185
CGGA_698	Pattern A	0.0391151	0	0	0.0223943	0	0.106053	0	0	0.0273182	0	0.0391669	0.0191442	0.255551	0	0	0.303146	0	0.00664053	0.151031	0	0	0.0304396	0.06	0.198669	1.00855
CGGA_700	Pattern A	0.0216442	0	0	0	0.0336167	0.117964	0	0	0	0	0	0.026097	0.226184	0	0	0.293133	0	0	0.274856	0	0	0.00650525	0.13	0.143981	1.0268
CGGA_703	Pattern A	0.0579949	0	0.00320527	0.122787	0	0.094142	0	0.0376612	0.0260414	0	0	0.044691	0.050159	0.0308002	0.059905	0.39152	0.0264487	0	0	0.0460504	0	0.00859311	0.01	0.288643	0.971075
CGGA_704	Pattern A	0.0379777	0	0	0.0390801	0	0.12984	0	0	0.0416326	0	0.0171273	0.0451373	0.108468	0	5.29137e-05	0.387958	0.0327714	0.00109644	0.14686	0	0.00707346	0.00492508	0.06	0.204451	1.00263
CGGA_720	Pattern A	0.00722492	0	0.0221861	0.07678	0	0.116386	0	0.0180048	0.105653	0	0.00379671	0.0753918	0.159313	0	0	0.31809	0.00639564	0.0102011	0	0.0805772	0	0	0.52	0.0314207	1.08446
CGGA_721	Pattern A	0.0169348	0	0	0	0	0.0815525	0	0	0.00869693	0	0.00439145	0.0278254	0.252725	0	0	0.137477	0.106779	0	0	0.362545	0	0.00107252	0.05	0.236144	1.0127
CGGA_725	Pattern A	0	0.075727	0.0368733	0.110227	0.0144558	0.0490048	0	0.0103602	0.00061586	0	0.0788739	0.00643252	0.0221552	0	0.00486131	0.289966	0	0	0.270744	0	0.00575697	0.0239461	0.15	0.134262	1.01854
CGGA_727	Pattern A	0	0.053003	0.0134041	0.00174177	0	0.0403053	0	0.038917	0	0	0	0.0273223	0.0869862	0	0.0236288	0.197589	0	0	0	0.514549	0.00255435	0	0	0.355819	0.964572
CGGA_730	Pattern A	0.105973	0	0	0.0261397	0	0.0976668	0	0	0	0	0.0224262	0.0508135	0.0204795	0	0.00675354	0.374728	0.0811015	0	0	0.174305	0	0.0396129	0.06	0.193655	1.01697
CGGA_731	Pattern A	0.0620816	0	0	0.0511857	0	0.150557	0	0	0.00215341	0	0.11459	0	0.0229773	0	0	0.509413	0	0.00681516	0	0.0227767	0	0.0574505	0.33	0.0554021	1.08703
CGGA_752	Pattern A	0	0.0945649	0.00510283	0.00678981	0.00881532	0.0134547	0	0	0	0	0	0.018297	0.139306	0	0.00435729	0.479337	0	0	0.229975	0	0	0	0.05	0.249084	0.992769
CGGA_757	Pattern A	0.076571	0	0	0.00730537	0	0.101046	0	0	0.0324037	0	0.0519103	0.0782161	0.125975	0	0	0.222515	0.0450029	0	0	0.259054	0	0	0.07	0.189124	1.02432
CGGA_761	Pattern A	0.16057	0	0.102109	0.0122716	0	0.037518	0	0.0222894	0	0	0	0.0423715	0.159139	0	0.029854	0.362331	0.0217632	0	0.0497826	0	0	0	0.07	0.18785	1.01517
CGGA_762	Pattern A	0	0.0208498	0	0	0	0.184453	0	0	0.116509	0	0.136343	0.00901932	0.203843	0	0	0.218421	0.0379196	0.00469755	0	0.0679447	0	0	0.59	0.0203538	1.08654
CGGA_763	Pattern A	0.0581567	0	0	0.0339902	0	0.214953	0	0	0.0845836	0	0.107719	0.00533484	0.0303556	0	0.00390993	0.305712	0	0	0.0206487	0	0	0.134637	0.52	0.0318807	1.08927
CGGA_780	Pattern A	0.00471143	0.00533098	0	0.00325595	0	0.103098	0	0.0583649	0	0	0	0.0642463	0.256847	0	0.0172613	0.412595	0	0.00484946	0.0694403	0	0	0	0.25	0.0760304	1.07575
CGGA_796	Pattern A	0.0113233	0.0069398	0	0	0	0.17023	0	0	0.0877781	0	0.094493	0	0.0284774	0	0.00741518	0.357427	0.0354705	0.0163982	0.13005	0	0.00495365	0.0490445	0.24	0.0851215	1.04857
CGGA_799	Pattern A	0	0.0638245	0	0.0428507	0.108619	0	0.0745119	0.0941369	0	0	0.0106986	0.0240656	0.0947583	0	0	0.420516	0	0	0.0632816	0	0	0.00273642	0.67	0.00844691	1.08669
CGGA_802	Pattern A	0.0939031	0	0	0	0	0.142869	0	0.00184387	0.0473814	0	0.0637942	0	0.0011285	0.122605	0.000481583	0.379483	0	0.0156958	0	0.0963384	0	0.0344754	0.24	0.0846405	1.06751
CGGA_804	Pattern A	0.0737513	0	0.00329826	0.0587368	0	0.0979238	0	0	0.0102298	0	0.0192489	0.0265774	0.13996	0	0.0648648	0.305011	0.0357178	0	0.150914	0	0	0.0137654	0.05	0.237989	0.984413
CGGA_808	Pattern A	0.0086459	0	0.00177052	0.0627777	0	0.0434284	0	0	0	0	0	0.0372181	0.0509545	0	0.00887412	0.519294	0.109895	0	0.12781	0.0160563	0	0.0132764	0	0.327409	0.958256
CGGA_810	Pattern A	0.0227194	0	0.000166032	0.00687122	0.0146464	0.0421369	0	0	0	0	0.0550562	0	0	0.0619378	0	0.0930728	0.00979624	0	0	0.122486	0	0.571112	0	0.684797	0.743078
CGGA_815	Pattern A	0.0122399	0.00292166	0	0.0612892	0	0.0660817	0	0.0204813	0.0101516	0	0.066116	0	0.0593534	0	0.00290364	0.58124	0.0623066	0.00472574	0.0473834	0	0	0.00280556	0.01	0.295557	0.978725
CGGA_818	Pattern A	0	0.0298653	0.0120289	0.105913	0	0.138325	0	0.00983924	0	0	0.0146303	0	0.185953	0	0	0.212954	0.0404364	0.0128275	0	0.198714	0.028588	0.00992449	0.16	0.129423	1.03637
CGGA_822	Pattern A	0	0.0381522	0.0281602	0.079652	0	0.0669779	0	0	0.0302222	0	0.0499737	0.0292799	0.0314417	0	0.0111191	0.412925	0.00839675	0	0	0.186479	0.0272198	0	0.44	0.0421748	1.08465
CGGA_825	Pattern A	0.0970668	0	0	0.0310414	0	0.0444037	0	0.0225664	0	0	0	0.0503125	0.215778	0	0.0569366	0.252801	0.159679	0	0.0333166	0.036098	0	0	0.08	0.173756	1.01834
CGGA_838	Pattern A	0	0.150814	0.061063	0	0.0336959	0.0225634	0	0.0280664	0	0	0	0.0794885	0.0235707	0	0	0.123054	0.0784519	0	0	0.397159	0.00155218	0.000520931	0.08	0.171702	1.04491
CGGA_842	Pattern A	0.0112872	0	0.000720857	0.0156394	0	0.149258	0	0	0.00401333	0	0.171339	0	0.120677	0	0	0.162386	0.0181482	0.00991525	0	0.200179	0.0649946	0.0714418	0.45	0.0409049	1.08536
CGGA_843	Pattern A	0	0.0368694	0	0	0.0729111	0.100932	0	0	0.0563634	0	0.138302	0	0.019709	0	0	0.422451	0.0148852	0	0	0.115389	0	0.0221886	0.82	-0.0158984	1.10797
CGGA_852	Pattern A	0.0313002	0	0	0	0	0.101619	0	0	0	0	0	0.0401094	0.278891	0	0.0199228	0.366309	0	0	0.161849	0	0	0	0.2	0.109505	1.05526
CGGA_858	Pattern A	0	0.0120053	0.0108956	0	0.171859	0	0	0	0	0	0	0.210795	0.090685	0	0	0.43834	0	0	0.0654192	0	0	0	0.99	-0.0459394	1.14468
CGGA_859	Pattern A	0	0.0334869	0.0111091	0	0	0.1059	0	0.0280205	0.0495311	0	0.0796301	0.00394199	0.0374657	0.131494	0.00318036	0.235392	0	0.00892786	0	0.208026	0.0131164	0.0507791	0.1	0.160052	1.03212
CGGA_861	Pattern A	0.0290394	0	0	0.00665199	0	0.079365	0	0	0.0104872	0	0	0.0479072	0.194277	0	0.00999002	0.424974	0.0349058	0	0.138937	0.0113207	0	0.0121444	0.12	0.154533	1.0358
CGGA_863	Pattern A	0.0104458	0	0	0	0	0.168678	0	0	0.046018	0	0.135009	0	0.168086	0	0.00028222	0.271087	0.0576422	0	0.0747192	0.00408449	0.0244434	0.0395053	0.25	0.0761459	1.05734
CGGA_864	Pattern A	0	0.0215647	0.00824701	0	0	0.151053	0	0.00611607	0.032922	0	0.0571086	0	0.0185055	0	0.00693499	0.544731	0	0.0110994	0.13378	0	0.00793845	0	0.2	0.109292	1.05588
CGGA_871	Pattern A	0	0.0290701	0.00723123	0.0328264	0.093635	0.0851059	0	0	0	0	0.0601421	0.0215219	0.0303591	0	0.0177844	0.530747	0.0215099	0	0	0.0565418	0	0.0135251	0.25	0.0778095	1.07756
CGGA_876	Pattern A	0.0745184	0	0	0.0389489	0	0.0675561	0	0.0047485	0.0153671	0	0.0439917	0.0183683	0.107077	0	0.0193798	0.495861	0.00891394	0	0.0818712	0	0	0.0233974	0.01	0.29627	0.969978
CGGA_882	Pattern A	0.0376571	0	0	0	0	0.186713	0	0	0.00236399	0	0	0.0746771	0.0439105	0	0.00953895	0.327333	0.0248069	0	0	0.263522	0.00457267	0.0249053	0.46	0.0390485	1.09636
CGGA_889	Pattern A	0.0367394	0	0	0.282678	0	0.0427129	0	0	0	0	0	0.167409	0	0	0.00941361	0.335183	0	0	0	0.0881701	0.00664994	0.0310437	0.93	-0.0287623	1.15144
CGGA_892	Pattern A	0	0.0266783	0.0152771	0.0366745	0.0205706	0.123416	0	0	0.0933566	0	0.177592	0	0.0335238	0	0.0264884	0.434256	0	0	0	0.00235242	0.00306088	0.00675345	0.2	0.105883	1.06122
CGGA_893	Pattern A	0	0.0259743	0	0.0235638	0.0135439	0.0388231	0	0	0.00348341	0	0	0.0645667	0.188694	0	0	0.205975	0	0	0	0.435375	0	0	0.25	0.0824052	1.11293
CGGA_905	Pattern A	0.0134806	0.0036982	0	0.0437119	0	0.116153	0	0	0.0698782	0	0.0540174	0	0.0233493	0	0.00315335	0.55354	0.0262342	0.00525729	0.0708984	0	0	0.0166281	0.06	0.200943	1.01975
CGGA_908	Pattern A	0.0253323	0	0	0	0	0.164144	0	0	0.0674255	0	0.048212	0.0603116	0.127882	0	0	0.356567	0	0.00521796	0	0.134484	0	0.0104238	0.18	0.115124	1.05255
CGGA_909	Pattern A	0	0.153903	0	0	0.13335	0.0500986	0	0	0	0	0.00914919	0.00235678	0.0293377	0	0	0.349574	0	0	0	0.24647	0	0.0257608	0.23	0.0913064	1.06134
CGGA_D03	Pattern A	0.0299547	0	0	0.0437361	0	0.0915765	0	0	0.0199615	0	0	0.051428	0.00916608	0	0	0.539735	0	0.0231321	0.19131	0	0	0	0.37	0.0514014	1.08063
CGGA_D16	Pattern A	0.0343425	0	0	0.027274	0	0	0	0.015742	0.0118951	0	0	0.0206989	0.00429455	0.309852	0.0101819	0.406995	0	0	0	0.147147	0.00274772	0.00882903	0	0.5409	0.843983
CGGA_D24	Pattern A	0.0414052	0	0.00372448	0.0963893	0	0.0832895	0	0.0119204	0	0	0	0.0451344	0.187432	0	0	0.486504	0	0	0.0442012	0	0	0	0.08	0.171854	1.03445
CGGA_D27	Pattern A	0.0863056	0	0.0646431	0	0.121198	0	0	0.0445849	0	0	0	0.0603668	0	0	0	0.241121	0.125171	0	0	0.256609	0	0	0.25	0.0786433	1.0636
CGGA_D28	Pattern A	0	0.0248615	0.0135946	0.0154553	0	0.247405	0	0	0.120488	0	0.0297891	0.0374166	0.03171	0	0.0188977	0.333718	0.0167435	0	0	0.0776942	0.0245383	0.00768783	0.26	0.0705415	1.06599
CGGA_D33	Pattern A	0	0.033471	0.019288	0.0795085	0	0.158876	0.0399971	0	0.0821572	0	0.158765	0.00468678	0.0810991	0.082326	0	0.206907	0	0.00176677	0.0412578	0	0.00989387	0	0.57	0.0237186	1.08585
CGGA_D37	Pattern A	0.132769	0	0.030275	0.248955	0	0.00631528	0.0293485	0.0314153	0	0	0	0.0393933	0.00924361	0	0.0356924	0.292215	0.0462987	0	0.0902753	0	0	0.00780285	0.16	0.130161	1.03077
CGGA_D38	Pattern A	0	0	0.028306	0.157383	0	0.0903235	0	0.0582863	0.098531	0	0.00295822	0	0.0572887	0	0.00282755	0.448002	0	0	0	0.022243	0	0.0338508	0.8	-0.0132157	1.1125
CGGA_D47	Pattern A	0	0	0.0285708	0.0747045	0.0339033	0	0	0.141793	0	0	0	0.0674598	0	0	0.0177429	0.432411	0	0	0	0.200621	0	0.00279407	0.15	0.136983	1.05084
CGGA_D48	Pattern A	0.0160911	0	0.0164086	0.0102837	0	0.0685696	0	0	0	0	0	0.0423258	0.136561	0	0.0509245	0.46269	0.0687183	0	0.127427	0	0	0	0.12	0.15573	1.03641
CGGA_D51	Pattern A	0.0143881	0	0.00395538	0.0682154	0	0	0	0.0314717	0.00871568	0	0	0.0566382	0.0999775	0	0.0125152	0.225822	0.0233388	0	0	0.434454	0.00836386	0.0121447	0.18	0.116673	1.08992
CGGA_D56	Pattern A	0.106243	0	0.0266387	0	0.0561507	0.0573785	0	0.0145142	0.00514307	0	0	0.0499584	0	0.054119	0.00768558	0.417732	0	0	0	0.204436	0	0	0.13	0.148865	1.04562
CGGA_J024	Pattern A	0.000835894	0.00369301	0.00357681	0.0353082	0.0653184	0	0	0.019739	0	0	0	0.0762964	0.0642969	0	0.00504544	0.471726	0.018226	0	0	0.222008	0	0.0139293	0	0.426121	0.909568
CGGA_J030	Pattern A	0	0.0356305	0	0.0369884	0	0.0804253	0	0.0198555	0	0	0	0.0845032	0.22321	0	0.00782228	0.214113	0.0307765	0	0	0.266675	0	0	0.34	0.0541396	1.09157
CGGA_J042	Pattern A	0.000939777	0	0.00770296	0.050801	0	0.0697671	0	0	0.0231677	0	0	0.0459081	0.104566	0	0.0217095	0.432613	0.10085	0	0	0.138028	0	0.00394617	0.05	0.227963	1.00676
CGGA_P112	Pattern A	0	0.0217953	0	0	0.00883766	0.07184	0	0.0025479	0	0	0	0.0303515	0.178636	0	0.00596331	0.194312	0.035574	0	0	0.415254	0	0.0348889	0.14	0.138382	1.07314
CGGA_P113	Pattern A	0.0519363	0	0	0.074056	0	0.115413	0	0	0.013865	0	0	0.0563653	0.139726	0	0.0117828	0.405716	0	0	0.13114	0	0	0	0.66	0.0105562	1.08587
CGGA_P122	Pattern A	0	0.0193715	0.00607313	0	0	0.0688692	0	0.162828	0	0	0	0.0772282	0.0513455	0	0.00768564	0.387422	0.015213	0	0	0.112211	0.00226554	0.089487	0.18	0.116031	1.05418
CGGA_P142	Pattern A	0	0.0227299	0.00694028	0.0747354	0	0.0310036	0	0.00239161	0	0	0.0436059	0.0169146	0.0930886	0	0.00785073	0.270813	0.112227	0	0	0.295261	0.00119174	0.0212468	0.08	0.168472	1.03432
CGGA_P144	Pattern A	0.00560901	0	0.00598585	0	0	0.0769135	0	0.0290243	0	0	0	0.0430646	0.171001	0	0.0290512	0.131847	0.0855043	0	0	0.389992	0	0.0320078	0.06	0.217956	1.02363
CGGA_P145	Pattern A	0	0	0.00640103	0.0327146	0	0.0763166	0	0	0.0240931	0	0.0420612	0.0223406	0.153752	0	0.00289257	0.187386	0.0440178	0	0	0.407731	0	0.000293289	0	0.312457	0.974988
CGGA_P155	Pattern A	0.0768706	0	0	0.113699	0	0.0940363	0	0	0	0	0.00937562	0.0295135	0.148358	0	0.0619376	0.182386	0.0531395	0	0.0238148	0.0532311	0	0.153638	0.67	0.00590335	1.09815
CGGA_P20	Pattern A	0	0.0239552	0.00568573	0	0	0.219586	0	0	0.0966731	0	0.0792216	0.00848839	0.0407367	0	0.000201093	0.269198	0.0463287	0.00402397	0.17272	0	0.00502853	0.0281531	0.38	0.0502411	1.05643
CGGA_P286	Pattern A	0	0.0522945	0.0290938	0.00946963	0	0.16173	0	0.00801837	0.163286	0	0.128596	0	0.0540141	0.030832	0.00455333	0.317784	0.0299596	0	0	0	0.0103696	0	0.31	0.0593773	1.06997
CGGA_P295	Pattern A	0.000469243	0.0114516	0.000483892	0.0530441	0	0.11053	0	0.0201601	0.0220753	0	0.0621321	0.0015866	0.123298	0	0	0.545816	0.00404785	0.00673303	0	0.0256179	0.00617991	0.00637342	0.07	0.180813	1.03535
CGGA_P306	Pattern A	0	0.0802324	0.030844	0.0163486	0.0292009	0.115966	0	0	0.00720561	0	0	0.119519	0.0305699	0	0.0141171	0.441078	0	0	0	0.11292	0.00199829	0	0.62	0.0169808	1.10146
CGGA_P337	Pattern A	0.0186654	0	0.00299339	0.0374374	0	0.0884372	0	0.0149267	0.00611809	0	0.0171367	0.0316242	0.00989329	0.0323498	0	0.599824	0.00556835	0	0.10861	0	0	0.0264146	0	0.301664	0.976383
CGGA_P338	Pattern A	0.115198	0	0.0178925	0.0678501	0	0.0486214	0.035498	0	0.0120909	0	0.0192733	0	0.040961	0	0.0416654	0.405176	0.100052	0	0.089244	0	0	0.00647656	0.44	0.0422689	1.06808
CGGA_P364	Pattern A	0	0.00495238	0	0.0201435	0	0.0254599	0	0.00152574	0	0	0	0.0273672	0.14579	0	0.0255955	0.50839	0.0922813	0	0.0480073	0.100487	0	0	0	0.330596	0.963665
CGGA_P388	Pattern A	0.050827	0	0.0352864	0.111436	0	0.0405489	0	0.0115226	0.000300473	0	0	0.0755829	0.16247	0	0.0209323	0.428817	0.0222757	0	0.0311539	0.00553527	0	0.00331172	0.06	0.201164	1.01341
CGGA_P392	Pattern A	0	0.0420358	0.00754856	0.016599	0	0.25649	0	0	0.0354196	0	0.0501885	0.101054	0.126912	0	0.0211769	0.261417	0	0	0	0.0166602	0.0644986	0	0.25	0.0765238	1.06741
CGGA_P401	Pattern A	0.000598483	0	0	0.0533823	0	0.0473414	0	0.00903876	0.0188789	0	0	0.0215343	0.0188272	0	0.0614105	0.470437	0.0993873	0	0	0.183712	0	0.0154517	0.07	0.189486	1.03199
CGGA_P416	Pattern A	0.0191838	0	0	0.0305171	0	0.3136	0	0.0156492	0.14928	0	0.0737673	0.00030825	0.0508813	0	0.00497107	0.143412	0.0306658	0.00320517	0.110892	0	0.0536661	0	0.09	0.160384	1.02934
CGGA_P422	Pattern A	0	0	0.0080375	0.0627181	0	0.201546	0	0	0.0779461	0	0.0337693	0.0187154	0.0507899	0	0	0.522388	0	0.0089455	0	0	0.0151449	0	0.17	0.120624	1.06104
CGGA_P437	Pattern A	0.111299	0	0	0.135765	0	0.0663882	0	0.0243318	0.0596304	0	0.00864528	0.104065	0.0412013	0	0.00941066	0.233314	0.171018	0	0	0.0305902	0.00434055	0	0.82	-0.0152723	1.09883
CGGA_P438	Pattern A	0.0429151	0	0	0	0	0.158862	0	0.00304559	0.0592087	0	0.0173819	0.0258657	0.00381571	0.0911733	0.0166014	0.530894	0	0	0	0.0502372	0	0	0.08	0.177575	1.04009
CGGA_P439	Pattern A	0.0756342	0	0	0.0302518	0	0.100768	0	0	0	0	0	0.0349724	0.118918	0	0.0357539	0.394586	0.0220489	0	0	0.146581	0.0292647	0.0112215	0.05	0.226886	1.00195
CGGA_P461	Pattern A	0.0361653	0	0	0.067483	0	0.0715168	0	0.0246272	0	0	0	0.0367367	0.22766	0	0.0268537	0.41407	0	0	0.0948882	0	0	0	0.15	0.135619	1.04336
CGGA_P468	Pattern A	0.0273472	0	0.00400886	0.0269047	0	0.223428	0	0	0.0930431	0	0	0.0202129	0.0619605	0	0	0.460109	0.000718298	0.0441438	0.0336123	0	0	0.00451163	0.57	0.0249095	1.09203
CGGA_P5	Pattern A	0.0614216	0	0	0.0247765	0	0.0921028	0	0.0166181	0.0164147	0	0	0.103902	0.0528793	0	0.00296219	0.216539	0.0250621	0	0	0.360184	0	0.0271378	0.44	0.0424031	1.11444
CGGA_P500	Pattern A	0.0146088	0	0.000850966	0.0621101	0	0.154307	0	0	0.0638664	0	0.0798425	0.00258243	0.0452141	0	0.0246439	0.192135	0.0845988	0	0	0.242038	0.0242043	0.00899766	0.21	0.101018	1.05106
CGGA_P501	Pattern A	0.0124449	0	0.00193204	0	0	0.123214	0	0	0.0375485	0	0.0401723	0	0.145559	0	0.0153213	0.388499	0.0676028	0	0.131915	0	0.00261668	0.0331746	0.01	0.298342	0.964429
CGGA_P505	Pattern A	0	0.0375268	0	0.0270345	0	0.0545992	0	0	0	0	0	0	0.331715	0	0	0.361215	0	0	0.15532	0.0168184	0	0.0157712	0.05	0.235786	1.00669
CGGA_P508	Pattern A	0.0709943	0	0.0132476	0.0683194	0	0.103003	0	0	0	0	0	0.0273092	0.16529	0	0.0304681	0.357838	0.0435098	0	0.120021	0	0	0	0.17	0.122947	1.03556
CGGA_P510	Pattern A	0.0488561	0	0	0.0856353	0	0.0444343	0	0.0142995	0.0214973	0	0	0.0401133	0.146005	0	0.0182146	0.369088	0.0528062	0	0	0.150707	0	0.00834316	0.13	0.149535	1.03656
CGGA_P520	Pattern A	0.0327495	0	0.0222816	0.0392294	0	0.0123739	0	0.0855905	0	0	0	0.0921875	0.0121166	0	0.0497831	0.377314	0.267	0	0.00937399	0	0	0	0.05	0.240742	0.994848
CGGA_P568	Pattern A	0.164158	0	0	0.0669374	0.00948565	0	0	0.0181436	0	0	0.0506003	0.0364974	0.165832	0	0.0385428	0.353618	0.0245113	0	0.0313956	0	0	0.040278	0.46	0.0401581	1.08135
CGGA_P619	Pattern A	0.0468115	0	0	0.0503661	0	0.0144236	0	0	0	0	0	0.0409719	0.10744	0	0.0130123	0.646066	0	0	0.0175392	0.044461	0	0.018909	0.04	0.255385	1.01379
CGGA_P625	Pattern A	0.074575	0	0	0.0288695	0	0.0387085	0	0.0174016	0.0307922	0	0	0.0259974	0.00018473	0.0502555	0.0113604	0.633123	0	0	0	0.0637444	0.00176118	0.023227	0	0.38786	0.935812
CGGA_P633	Pattern A	0.00997807	0	0	0.0524191	0	0.134493	0	0	0.0380836	0	0.026226	0.0218105	0.0385604	0	0.0116819	0.354084	0.0440599	0	0	0.241628	0	0.0269751	0.06	0.197036	1.01813
CGGA_P7	Pattern A	0.0708306	0	0.0135603	0.0250757	0	0.120394	0	0.0104348	0	0	0	0.0147972	0.0934235	0	0.0238043	0.402075	0.000363509	0	0	0.192861	0.00745696	0.0249227	0.05	0.23952	0.996741
CGGA_P83	Pattern A	0.0693974	0	0	0.0240051	0	0.087012	0	0.00061327	0	0	0.0136924	0.0224692	0.150923	0	0.00508901	0.474346	0.0370881	0.000733249	0.106674	0	0	0.00795698	0	0.383703	0.927275
GSM2899178	Pattern A	0.029007	0	0.00117903	0	0	0.111862	0	0	0.0117666	0	0.0578568	0.00396167	0.252989	0	0.00840178	0.394552	0.00309015	0.00928093	0.112561	0	0.00349175	0	0.04	0.261442	0.985816
GSM2899181	Pattern A	0	0.117931	0.0200266	0.0915848	0	0.108647	0	0.0377019	0.00185494	0	0.0615719	0.03227	0.0577742	0	0.00025144	0.405896	0.0485162	0.00155923	0	0.00415612	0.00863942	0.00161887	0.59	0.0207501	1.08566
GSM2899182	Pattern A	0	0.0206049	0.0021342	0	0.0248188	0.0383134	0	0	0	0	0	0.0173693	0.200511	0	0.00695793	0.490963	0	0	0.198327	0	0	0	0.05	0.241853	1.00246
GSM2899183	Pattern A	0	0.0267452	0.00542904	0.0368502	0	0.094112	0	0	0.0329978	0	0.0764774	0	0.204744	0	0.0113109	0.219328	0.0122102	0	0.26299	0.0168056	0	0	0.06	0.212204	0.992596
GSM2899185	Pattern A	0	0.00514553	0.0206282	0.109168	0	0.0855725	0	0.0565316	0.0890439	0	0.0682418	0.0740198	0.0488564	0	0.0121122	0.185486	0.0361267	0	0.20506	0	0	0.00400713	0.62	0.0165133	1.07785
GSM2899189	Pattern A	0	0	0.00566082	0.130912	0	0.0119545	0	0.0257622	0	0	0	0.0522449	0.102805	0	0.0447908	0.515397	0.0426147	0	0.0223722	0.0302344	0	0.0152517	0.17	0.122804	1.06116
GSM2899190	Pattern A	0.0237121	0	0.161588	0.0495926	0	0.0417368	0.0328958	0.0359644	0	0.032088	0	0.0705327	0.022236	0	0.0210819	0.317853	0.101755	0	0	0.0490291	0.0085676	0.0313667	0.02	0.275653	0.971697
GSM2899191	Pattern A	0.00947227	0.00739125	0	0.0349435	0	0.113523	0	0.0273443	0	0	0	0.0377881	0.136247	0	0.00513054	0.454723	0.0114484	0	0.151384	0	0	0.0106045	0	0.326631	0.953392
GSM2899192	Pattern A	0	0.024634	0.0191845	0.0126437	0.0098776	0.0460818	0	0.0138963	0.0144606	0	0.0180706	0.0253988	0.0192047	0	0	0.150452	0.0959368	0	0	0.550159	0	0	0.04	0.256416	1.02966
GSM2899193	Pattern A	0	0.0273126	0.00888926	0.0280442	0	0.0637669	0	0.0180026	0	0	0	0.0363477	0.0489605	0	0.00901193	0.383252	0.159212	0	0	0.213901	0	0.0032995	0.05	0.239332	1.00102
GSM2899199	Pattern A	0	0.00980503	0.00208124	0.0358481	0	0.0143407	0	0.0184093	0.0108704	0	0	0.0238096	0.204353	0	0.0166533	0	0.107355	0	0	0.45134	0	0.105135	0	0.338947	0.9702
GSM2899201	Pattern A	0.0305417	0	0	0.00880332	0	0.136237	0	0.028024	0	0	0	0.01969	0.202425	0	0.0938768	0.236312	0.0986753	0	0.134694	0	0	0.0107203	0.06	0.212378	0.99766
GSM2899202	Pattern A	0.0163251	0.00317401	0	0.085927	0	0.00979254	0.0158681	0	0	0	0.0374833	0	0.202513	0	0.00553826	0.493084	0.0105762	0.00630681	0.0738084	0	0	0.0396031	0	0.343048	0.952954
GSM2899204	Pattern A	0	0.0205845	0.0174335	0.128908	0	0.107251	0	0	0.063164	0	0.0779313	0.0306621	0.0338457	0	0.030988	0.209672	0.0253655	0	0.249848	0	0	0.00434673	0.26	0.0738786	1.04647
GSM2899205	Pattern A	0.0271186	0.00567818	0	0.0566801	0	0.0827972	0	0	0.00529961	0	0.00661994	0.0447577	0.189013	0	0.00398705	0.468374	0	0	0.109674	0	0	0	0.06	0.215741	1.00996
GSM2899207	Pattern A	0.0204332	0	0.00913754	0.0636701	0	0.139038	0	0.0162186	0.0351975	0	0	0.120449	0.0878742	0	0.00907808	0.309677	0.0394629	0	0	0.122575	0.0211044	0.00608554	0	0.349323	0.943672
GSM2899208	Pattern A	0.0579199	0	0	0	0	0.132784	0	0.00287151	0.00381613	0	0.000867687	0.0570443	0.302263	0	0.0314303	0.295256	0.0269938	0	0	0.0887535	0	0	0.01	0.288621	0.975026
GSM2899212	Pattern A	0.00847234	0.00438205	0.0227894	0.0786465	0	0.0852108	0	0.0254126	0.025566	0	0	0.145	0.0468273	0	0.000254769	0.535688	0	0	0	0.02175	0	0	0.45	0.0404049	1.10919
GSM2899215	Pattern A	0.00742297	0	0	0	0.00563959	0.0646914	0	0.00319695	0.0207457	0	0	0.0710122	0.113196	0	0.00137767	0.0898459	0.112544	0	0	0.510327	0	0	0	0.50898	0.866226
GSM2899216	Pattern A	0	0.0944082	0.0533523	0	0.0888875	0.0970349	0	0.156914	0.0263427	0	0.0902629	0.0781637	0.0666215	0	0	0.147478	0.020296	0	0.0802382	0	0	0	0.25	0.0748974	1.06288
GSM2899218	Pattern A	0.0468026	0	0.0103361	0.0956026	0	0.105194	0	0.0720947	0	0	0	0.0733431	0.0252607	0	0	0.407827	0.0491527	0.00884884	0	0.0995063	0	0.00603164	0.61	0.0172429	1.09337
GSM2899219	Pattern A	0.0130352	0	0.00638337	0.0325639	0	0.107783	0	0.0164474	0	0	0.0134497	0.0412982	0.0875892	0	0.00441952	0.49059	0.0123509	0	0	0.16452	0	0.00956976	0.09	0.165834	1.04147
GSM2899222	Pattern A	0	0.0125966	0.00984704	0.00763486	0	0.0570542	0	0.0258196	0.0179183	0	0	0.0443324	0.146753	0	0.00629216	0.152299	0.0294273	0	0	0.481122	0.00461193	0.00429139	0	0.355502	0.961027
GSM2899223	Pattern A	0.0806877	0	0	0.0521978	0	0.142434	0	0.00058082	0.122781	0	0.138232	0.032829	0.109073	0	0.0097876	0.263665	0.0299153	0	0	0.0178156	0	0	0.4	0.0489457	1.07963
GSM2899225	Pattern A	0	0.0324043	0.0197847	0.00812243	0	0.081436	0	0	0.0258152	0	0	0.0584059	0.262303	0	0.000560914	0.0669214	0.00657388	0	0	0.400034	0	0.0376382	0	0.456196	0.894317
GSM2899227	Pattern A	0.067681	0	0.0473927	0.0919742	0	0.0428967	0	0.0123142	0.0624475	0	0	0.127693	0.0284693	0	0	0.149975	0.118169	0	0	0.250987	0	0	0.31	0.0587356	1.08477
GSM2899230	Pattern A	0.0472566	0	0	0.0869585	0	0.0454881	0	0.0560154	0	0	0	0.0500288	0.155883	0	0.0105957	0.389163	0.0735579	0	0	0.0850537	0	0	0.08	0.178266	1.02302
GSM2899231	Pattern A	0.0378278	0	0.00103608	0.0477646	0	0.0641852	0	0	0.0197463	0	0.0248313	0.0204838	0.0372865	0	0.00814987	0.295023	0.163829	0	0	0.26376	0	0.0160771	0.16	0.130491	1.04736
GSM2899232	Pattern A	0.0332286	0	0	0.0118893	0.00665528	0.0284108	0	0.0181635	0	0	0	0.0232368	0.119727	0	0.0329435	0.56566	0.0295679	0	0.120413	0	0	0.0101049	0.06	0.218035	1.01945
GSM2899234	Pattern A	0.0112008	0	0	0.0969973	0	0.0154161	0	0.00339598	0.0166515	0	0	0.0604885	0.0529989	0	0	0.50039	0.0702412	0.00789777	0	0.131603	0.0234201	0.00929892	0.24	0.0876002	1.08073
GSM2899235	Pattern A	0	0.0864539	0	0.0293212	0.0234743	0.0757648	0	0	0	0	0	0.0320517	0.173162	0	0.0199833	0.236432	0.0430632	0	0.10071	0.179585	0	0	0.21	0.103405	1.04473
GSM2899237	Pattern A	0	0.10108	0.0261731	0.0342052	0	0.0789747	0	0	0.0313507	0	0	0.0610754	0.0700991	0	0.0173735	0.0847689	0.0640976	0	0	0.414691	0.0137514	0.00235902	0	0.325573	0.964977
GSM2899238	Pattern A	0.0677988	0	0	0.243402	0	0.00693093	0	0	0	0	0	0.0992758	0.172117	0	0.0197003	0.207446	0.0807299	0	0	0.0951574	0	0.00744139	0.45	0.0405057	1.08322
GSM2899239	Pattern A	0.0255351	0	0	0.1063	0	0.152069	0	0	0.0245213	0	0	0.0851953	0.0884048	0	0.00535081	0.229841	0.055746	0	0	0.191945	0.0350915	0	0.39	0.0495476	1.07971
GSM2899240	Pattern A	0	0.173608	0.0169633	0.0697756	0.0418329	0	0	0.0481915	0	0	0	0.0642474	0.154273	0	0	0.243837	0.0130844	0	0	0.174187	0	0	0.22	0.092899	1.05254
GSM2899241	Pattern A	0.0571184	0	0	0.0319636	0	0.148066	0	0.0339162	0	0	0	0.0956697	0.0892629	0	0.00512387	0.361032	0.0116112	0.00163521	0	0.14379	0	0.0208118	0	0.360823	0.938034
GSM2899243	Pattern A	0.0263956	0	0	0	0	0.220798	0	0	0.0596366	0	0.0117813	0.0825644	0.223099	0	0.00956738	0.228414	0	0	0.137744	0	0	0	0.09	0.160706	1.02117
GSM2899245	Pattern A	0	0.08653	0.0152192	0.0100814	0	0.139315	0	0.0203468	0.0671332	0	0	0.0875389	0.0750814	0	0.0179371	0.23543	0.0732659	0	0	0.155629	0.0164915	0	0.24	0.0846153	1.05369
GSM2899246	Pattern A	0.0255351	0	0	0.1063	0	0.152069	0	0	0.0245213	0	0	0.0851953	0.0884048	0	0.00535081	0.229841	0.055746	0	0	0.191945	0.0350915	0	0.39	0.0495476	1.07971
GSM2899247	Pattern A	0	0.0988585	0.0390398	0.0452838	0	0.0964203	0	0.000481628	0.0430074	0	0	0.0365919	0.0975723	0	0.00547344	0.135764	0.0418	0	0	0.359707	0	0	0.02	0.279804	0.979788
GSM2899248	Pattern A	0	0.0383141	0.00781612	0	0	0.142719	0	0.000134601	0	0	0	0.0536127	0.120655	0	0.0353692	0.337567	0.0460756	0	0.190565	0.0176802	0	0.00949098	0.05	0.250119	0.98029
GSM2899251	Pattern A	0	0.222835	0.0235723	0.0746093	0	0.0534676	0	0.0540385	0	0	0	0.0842619	0.194278	0	0.0246121	0.204577	0	0	0.0637481	0	0	0	0.3	0.0628638	1.05833
GSM2899252	Pattern A	0	0.0280515	0.0138283	0.014046	0	0.107279	0	0.00294415	0.013052	0	0	0.0603272	0.0404162	0	0.0063651	0.136712	0.0946445	0	0	0.479516	0.00281769	0	0.24	0.0879324	1.10788
GSM2899253	Pattern A	0	0.011438	0.00416185	0.0425383	0	0.0258728	0	0.0554393	0	0	0	0.0787731	0.0113489	0	0.00913762	0.226559	0.129431	0	0	0.384642	0	0.0206581	0	0.406609	0.922935
GSM2899256	Pattern A	0.0145103	0	0.00133721	0.0411504	0	0.115721	0	0.00654632	0.0408676	0	0.0953666	0.019983	0.0791294	0	0.00218734	0.51182	0	0.00566847	0.0333826	0	0.0104246	0.021905	0.06	0.209188	1.01567
GSM2899257	Pattern A	0	0.0102134	0.003495	0.0385681	0	0.0967287	0	0.00781124	0	0	0	0.0179481	0.153545	0	0.0204297	0.454411	0.0611972	0	0.109442	0.00370429	0	0.0225055	0	0.31343	0.962363
GSM2899259	Pattern A	0.0371308	0	0.00774634	0.0852756	0	0.160576	0	0.00883724	0.0479266	0	0	0.0982783	0.0450769	0	0.0126069	0.291107	0.0281637	0	0	0.174509	0	0.00276609	0.12	0.154263	1.03703
GSM2899261	Pattern A	0	0.0385211	0.00867434	0.122103	0	0.174326	0	4.16818e-05	0.00213901	0	0.056494	0.0312483	0.0406633	0	0.019069	0.223922	0.0867718	0	0	0.176987	0.0190393	0	0.21	0.0995656	1.05086
GSM2899263	Pattern A	0.0418131	0	0	0.0217288	0	0.0947421	0	0.0501061	0.00248761	0	0	0.0907964	0.181828	0	0.0607684	0.292707	0.000531392	0	0.12573	0.0367615	0	0	0.61	0.0174888	1.07939
GSM2899264	Pattern A	0	0.0916445	0.002524	0	0.014244	0.0350031	0	0.014564	0.0101446	0	0	0.0282845	0.0758258	0	0.00917048	0.0861334	0.120866	0	0	0.511596	0	0	0	0.302932	0.990925
GSM2899266	Pattern A	0.0633545	0	0.070148	0.10579	0	0.0305528	0	0.000789387	0.0126039	0	0	0.0204642	0.075976	0	0.0162555	0.371633	0.171264	0	0	0.0156951	0.00315297	0.0423211	0.08	0.17679	1.01859
GSM2899268	Pattern A	0.0375038	0	0	0.0406728	0	0.0832719	0	0	0.0574144	0	0.0882809	0	0.00657298	0.164443	0.0109147	0.47301	0	0	0.00465867	0.0148897	0	0.0183664	0.09	0.166344	1.04735
GSM2899269	Pattern A	0	0.0944991	0	0.027659	0	0.100181	0	0	0.0178439	0	0	0.0466153	0.103237	0	0.0171683	0.342339	0.0421252	0	0	0.20777	0	0.000561745	0.2	0.106993	1.05438
GSM2899270	Pattern A	0	0.0623134	0	0.0870234	0	0.0135303	0	0	0.00146975	0	0	0.00761123	0	0.119129	0.0334829	0.471013	0.140164	0	0.0297896	0.0344734	0	0	0.01	0.285664	0.986343
GSM2899271	Pattern A	0	0.0587003	0.00740727	0.0393882	0	0.115704	0	0	0	0	0	0.0150913	0.245054	0	0.00870639	0.231789	0	0	0.278159	0	0	0	0.08	0.174139	1.01012
GSM2899272	Pattern A	0.0647609	0	0.00711657	0.132923	0	0.0359966	0	0.014916	0	0	0	0.0321103	0.100013	0	0.0353742	0.507502	0.0175727	0	0	0.0478845	0	0.00382997	0	0.350507	0.945572
GSM2899276	Pattern A	0.10713	0	0	0	0.0505143	0.190104	0	0.0326162	0.178038	0	0.130562	0	0.0201718	0	0	0.148513	0.0681731	0	0	0.0741772	0	0	0.69	0.00507633	1.10151
GSM2899278	Pattern A	0	0.00504756	0.00791832	0.0118391	0	0.19036	0	0.0117555	0.00454328	0	0	0.084282	0.0369793	0	0.00383988	0.0482037	0.0172526	0	0	0.565394	0.00985733	0.00272725	0	0.622142	0.783282
GSM2899282	Pattern A	0	0.0440824	0	0.0419169	0	0.016117	0	0.137753	0	0	0	0.0764901	0.133713	0	0.010763	0.345012	0.0390707	0	0.0798134	0.0752684	0	0	0.28	0.0679531	1.06182
GSM2899283	Pattern A	0.147233	0	0	0	0	0.131991	0	0.0579576	0.121049	0	0.110018	0	0.0220346	0.0589078	0.00213107	0.232232	0	0	0	0.113181	0	0.00326495	0.56	0.0252999	1.08179
GSM2899285	Pattern A	0	0.0704254	0.00406622	0.0309576	0	0.181	0	0	0	0	0.0488985	0.0597446	0.0606968	0	0.0021005	0.331467	0.0273095	0	0.175409	0	0	0.007925	0.46	0.0390065	1.06341
GSM2899286	Pattern A	0	0.120999	0.0284643	0.0540415	0	0.134333	0	0	0.0900544	0	0	0.0494941	0.0120656	0	0	0.289077	0.0919724	0	0	0.129499	0	0	0.6	0.0188007	1.07783
GSM2899289	Pattern A	0.051688	0	0.0111027	0.0205421	0	0.059841	0	0.00137811	0	0	0.00305471	0.0101868	0.222882	0	0.0259835	0.384997	0	0.00171614	0.111882	0	0.0830132	0.0117328	0.13	0.145377	1.03832
GSM2899290	Pattern A	0	0.0417805	0.00480884	0.071523	0	0.130635	0	0.00961436	0.0625758	0	0.108971	0	0.0608265	0	0	0.449986	0.0114347	0.00618152	0	0.00932986	0	0.0323327	0.24	0.0875982	1.06627
GSM2899292	Pattern A	0.0281266	0	0	0.0494555	0	0.0696962	0	0	0.0307705	0	0	0.0491469	0.192286	0	0.0053706	0.19125	0.0565788	0	0	0.327319	0	0	0.02	0.278008	0.985325
GSM2899293	Pattern A	0.0756084	0	0	0.0267282	0	0.0670171	0	0.0317019	0.00424929	0	0.0276877	0.0185953	0.159805	0	0.0701324	0.293981	0.0718447	0	0.151034	0	0	0.00161516	0.04	0.255389	0.97753
GSM2899295	Pattern A	0	0.0358669	0.0421727	0.0610772	0	0.0845824	0	0.00675931	0.0566345	0	0	0.149806	0.116783	0	0.0216334	0.215391	0.0408234	0	0	0.162077	0	0.00639344	0.15	0.138212	1.04527
GSM2899296	Pattern A	0.0305855	0	0.00719334	0.054211	0	0.105498	0	0.0350266	0.0156027	0	0	0.06324	0.0832356	0	0.00264849	0.271202	0.0285822	0	0	0.300363	0	0.00261129	0.01	0.292526	0.975952
GSM2899298	Pattern A	0.0458988	0	0.0281268	0.165598	0	0.0343215	0	0.00870755	0	0	0	0.0150596	0.198084	0	0.0225461	0.246907	0.0591208	0	0.0113435	0.164287	0	0	0.13	0.145095	1.02933
GSM2899301	Pattern A	0.0613269	0	0	0.0637873	0	0.145794	0	0.0556906	0.0830318	0	0.0958414	0.0461048	0.0573636	0	0	0.259472	0.0114681	0.00807539	0.0997095	0	0.0123344	0	0.16	0.12536	1.03889
GSM2899302	Pattern A	0.0304016	0	0	0.129296	0	0.0267421	0	0.0421479	0	0	0	0.0704776	0.231827	0	0.0197762	0.269983	0.0257728	0	0	0.147525	0.00604974	0	0.08	0.176098	1.02532
GSM2899303	Pattern A	0.0698113	0	0.0788691	0.0587933	0	0.133654	0	0.0449984	0	0	0	0.0693088	0.0570796	0	0.027368	0.305839	0.0279401	0.00383844	0.0619336	0	0	0.0605664	0.29	0.0675202	1.05322
GSM2899304	Pattern A	0	0.137827	0	0.076272	0	0.057884	0	0	0.0292241	0	0	0.0400611	0.161536	0	0.0118619	0.394414	0	0	0.0909197	0	0	0	0.24	0.0892393	1.05369
GSM2899305	Pattern A	0.0574446	0	0	0.0979377	0	0.18006	0	0	0.0118613	0	0.0744943	0.00707027	0.0831896	0	0.0120643	0.227739	0.0714013	0	0	0.169691	0.00704632	0	0.19	0.112512	1.04252
GSM2899306	Pattern A	0.0184413	0	0	0.124341	0	0.102608	0	0.0481095	0	0	0	0.0640594	0.186251	0	0.0131206	0.169872	0.0659957	0	0	0.207201	0	0	0.17	0.122366	1.04635
GSM2899308	Pattern A	0.0743092	0	0	0.0238173	0	0.0945025	0	0	0.00917066	0	0.00740619	0.0042449	0.189837	0	0.0336419	0.31798	0.0820702	0	0.119319	0.0292598	0	0.014441	0.05	0.240074	0.987875
GSM2899309	Pattern A	0	0.0438597	0	0.060288	0	0.0432116	0	0.0625456	0	0	0	0.0908877	0.0946571	0	0.0224939	0.335484	0	0	0	0.246573	0	0	0.24	0.0842721	1.07727
GSM2899310	Pattern A	0.0416608	0	0	0.0408332	0	0.230254	0	0.0182169	0.0741355	0	0.0499984	0.0667082	0.0589663	0	0.0156827	0.259812	0.0871346	0	0.0223627	0	0.0342349	0	0.2	0.108932	1.04776
GSM2899311	Pattern A	0	0.0646212	0.025102	0	0.00937642	0.111243	0	0	0.0440399	0	0	0.159695	0.0437035	0	0.0026528	0.366731	0	0	0	0.172835	0	0	0.08	0.172965	1.03902
GSM2899312	Pattern A	0.0251862	0.00755562	0.0272043	0	0	0.0771684	0	0.0782337	0	0	0	0.100218	0.219803	0	0.0236543	0.250867	0	0	0.190109	0	0	0	0.59	0.0215553	1.07071
GSM2899313	Pattern A	0.0302632	0	0	0	0	0.359675	0	0	0.0384031	0	0.144598	0.0404184	0.0519441	0.0574538	0	0.0964688	0.0441838	0.012304	0.124288	0	0	0	0.66	0.011377	1.09715
GSM2899314	Pattern A	0	0.10511	0	0.12128	0	0.106461	0	0.0621562	0.0137922	0	0.0170687	0.0245148	0.0746575	0	0.0068522	0.350528	0.0257249	0	0.0606591	0.0198086	0.0113861	0	0.21	0.102321	1.04402
GSM2899315	Pattern A	0	0.0268616	0.000633392	0	0.00581798	0.0379546	0	0.0306824	0.0124979	0	0	0.0367497	0.148493	0	0.0120066	0.192563	0	0	0	0.49574	0	0	0.06	0.207602	1.05195
GSM2899316	Pattern A	0.0222925	0	0	0.0154396	0	0.104065	0	0.0332133	0.00236747	0	0	0.0578371	0.0417149	0	0.00307486	0.0743844	0.044603	0	0	0.598596	0.0024119	0	0	0.414963	0.94189
GSM2899317	Pattern A	0	0.103511	0	0.0850238	0	0.087294	0	0.0082332	0	0	0	0.0756869	0.266166	0	0.0260991	0.142763	0.0630701	0	0	0.142153	0	0	0.3	0.0613862	1.06846
GSM2899318	Pattern A	0	0.0639141	0	0.0636713	0	0.0519536	0	0.0469909	0	0	0	0.0713697	0.231816	0	0.00563383	0.17644	0.0410091	0	0	0.247201	0	0	0.06	0.202312	1.01536
GSM2899319	Pattern A	0.0340668	0.0224657	0	0.0491578	0	0.232781	0	0	0.130593	0	0.108102	0	0.0222496	0	0	0.319143	0	0.0279592	0	0	0.0534814	0	0.09	0.163642	1.02972
GSM2899320	Pattern A	0.0959322	0	0	0.0187515	0	0.0874502	0	0.0220205	0	0	0	0.0622595	0.0224243	0	0.0103551	0.0758237	0.140644	0	0	0.454338	0	0.0100014	0.16	0.12792	1.07813
GSM2899321	Pattern A	0	0.0826057	0.0358858	0.0766455	0	0.114641	0	0	0.10524	0	0.133214	0	0.0325261	0	0.036308	0.275304	0.0208846	0	0	0.0555993	0.0311465	0	0.16	0.124128	1.0363
GSM2899322	Pattern A	0.0150118	0	0	0	0	0.163045	0	0.00232303	0.00977141	0	0	0.0560005	0.0269977	0	0.0188739	0.0826649	0.164997	0	0	0.455253	0	0.00506224	0.09	0.167445	1.05812
GSM2899323	Pattern A	0	0.123957	0.0206958	0.0845384	0	0.109602	0	0.00124676	0.0405944	0	0	0.0173832	0.204726	0	0	0.346104	0	0	0	0.0511524	0	0	0.22	0.0920724	1.05535
GSM2899325	Pattern A	0	0.124332	0.0355696	0.0435041	0	0.0491972	0	0.04158	0.0147466	0	0	0.10593	0.0920134	0	0.0209281	0.299171	0	0	0.157293	0.0157352	0	0	0.28	0.0698794	1.04952
GSM2899329	Pattern A	0.0601458	0	0.0148392	0.0257719	0	0.158621	0	0	0.0338883	0	0.125362	0	0.0630427	0	0.000851123	0.47969	0	0.000885397	0	0.0116311	0.0107918	0.0144793	0.47	0.0375103	1.08909
GSM2899330	Pattern A	0.00747121	0	0.00246899	0	0	0.116583	0	0.0274272	0.0360663	0	0.126861	0	0.0426959	0	0.0328922	0.410933	0.00724378	0	0	0.134976	0	0.0543825	0.1	0.159791	1.03335
GSM2899333	Pattern A	0.0385935	0	0	0.0294553	0	0.10756	0	0.00550665	0.00402375	0	0.104372	0.00816283	0.0212227	0.0294502	0.00438877	0.579368	0.0126028	0	0.00720264	0	0.00773372	0.0403575	0	0.355954	0.948203
GSM2899334	Pattern A	0.000648299	0.00369456	0	0.0530531	0	0.0936093	0	0.0410758	0.030086	0	0.103951	0.00488041	0.0197419	0.119221	0.0137406	0.445637	0	0.0015538	0	0.012569	0	0.0565387	0.2	0.107271	1.06989
GSM2899335	Pattern A	0.114149	0	0	0.0151536	0.00912834	0.134548	0	0.00199618	0	0	0.107789	0	0.0359316	0.0453944	0.00294809	0.386014	0	0.00266743	0	0.0991995	0.000186388	0.0448945	0.15	0.135763	1.04023
GSM2899336	Pattern A	0.0977826	0	0	0.0257639	0	0.183737	0	0.0142265	0.0360109	0	0.13073	0.0191159	0.11971	0	0	0.304643	0	0.00543267	0.0519765	0	0	0.0108717	0.42	0.0474176	1.07166
GSM2899337	Pattern A	0.0514492	0	0	0.0443235	0	0.123771	0	0.0231959	0.00269614	0	0.0403514	0.0281344	0.130049	0	0.00444097	0.492392	0.00198036	0.00411004	0.0218629	0	0	0.0312431	0.08	0.173537	1.03195
GSM2899338	Pattern A	0.0958005	0	0	0.00842608	0	0.104745	0	0.034779	0.0203023	0	0.0632396	0.00703724	0.0246641	0.0655661	0.0049962	0.434624	0	0	0	0.0851731	0	0.0506469	0.12	0.155422	1.03649
GSM2899340	Pattern A	0.0568698	0	0	0.0420326	0	0.144909	0	0.0122424	0.0459819	0	0.0759829	0.0119916	0.0538607	0	0.0151808	0.470054	0	0	0.0630943	0	0	0.00780027	0.13	0.143943	1.03657
GSM2899341	Pattern A	0	0.0192276	0.0137816	0.124608	0	0.0409087	0	0.047257	0	0	0.00917441	0	0.0294894	0	0.0738417	0.55663	0.0096453	0	0.0752699	0	0	0.000167037	0.16	0.130883	1.05362
GSM2899348	Pattern A	0	0.0153998	0.00381376	0.0406834	0	0.197231	0	0.0278633	0	0	0.0646924	0.0930132	0.0495873	0	0.0988166	0.310552	0.0213038	0	0.0764936	0	0	0.000549654	0.07	0.182739	1.02143
GSM2899359	Pattern A	0	0.0277801	0.0151821	0.0410153	0	0.0455767	0	0.000477241	0	0	0	0.069833	0.0807855	0	0.0130856	0.368689	0.123315	0	0	0.211601	0	0.00265896	0.06	0.206147	1.0183
GSM2899360	Pattern A	0.0214478	0	0.00395047	0.00077727	0.0140021	0.0764439	0	0	0.00362134	0	0.0146119	0.0476598	0.183425	0	0.00458662	0.487555	0.0350562	0	0	0.106864	0	0	0.05	0.253429	1.00171
GSM2899362	Pattern A	0.010932	0.0180517	0.0101783	0.044693	0	0.33057	0	0.0294075	0.14983	0	0.0476553	0.0531071	0.0493659	0	0	0.102111	0.0809684	0.00746392	0	0.0460127	0.0171875	0.00246626	0.21	0.100965	1.0715
GSM2899363	Pattern A	0	0.00430774	0.00632884	0.0116533	0	0.0417076	0	0.0779347	0	0	0	0.0694257	0.220905	0	0.0584932	0.430836	0	0	0.00818998	0.068495	0	0.00172367	0.05	0.246318	1.00067
GSM2899364	Pattern A	0	0.0457867	0.0161479	0.0729125	0	0.120673	0	0.0208375	0	0	0.010729	0.0520044	0.0143054	0.032411	0.00503654	0.577265	0.00906869	0	0.00782719	0	0.0059617	0.00903338	0.13	0.146741	1.05396
GSM2899368	Pattern A	0.0172494	0	0	0.0115182	0	0.052031	0	0.00797049	0	0	0	0.0322817	0.111091	0	0.00238326	0.631302	0	0	0.0899336	0.0229663	0.000435973	0.0208365	0	0.329624	0.968868
GSM2899372	Pattern A	0	0.0218046	0	0.0874291	0	0.0278625	0	0.0388557	0.0508582	0	0.0386916	0	0.142983	0	0.000351699	0.467033	0	0.00355855	0	0.0205093	0.0339323	0.0661305	0.2	0.109687	1.06394
GSM2899373	Pattern A	0.0350677	0	0	0	0	0.107808	0	0.0257335	0.000126729	0.0110758	0	0.0800363	0.0218456	0	0.00456683	0.0886449	0.0164326	0	0	0.593125	0.0154669	7.00675e-05	0	0.432069	0.933318
GSM2899374	Pattern A	0.0282567	0	0	0.0900624	0	0.0777081	0	0	0.00241288	0	0	0.0534968	0.197091	0	0.0143811	0.301545	0.0485396	0	0	0.186506	0	0	0.31	0.0592688	1.07866
GSM2899375	Pattern A	0	0.0123762	0.00860812	0.119178	0	0.102319	0	0.00405588	0.0362327	0	0	0.0662537	0.00780405	0	0.0165614	0.393324	0.106988	0	0	0.0913171	0	0.0349826	0.3	0.0632071	1.07394
GSM2899376	Pattern A	0	0.0098546	0.00558853	0.0169986	0	0.0553946	0	0.0669938	0	0	0	0.0384334	0.0862991	0.0259118	0.00387555	0.282203	0.00721844	0	0	0.360818	0	0.0404111	0.08	0.171656	1.04732
GSM2899378	Pattern A	0.0299354	0	0.00228836	0.0422843	0	0.0447549	0	0.00932409	0	0	0	0.0141761	0.193488	0	0.0119708	0.450701	0.023871	0	0.135766	0.00196157	0	0.0394786	0.06	0.197516	1.02074
GSM2899379	Pattern A	0.0243553	0	0.0248478	0.0925436	0	0.0322284	0.0147336	0.000433766	0.00425782	0	0.0242955	0	0.049394	0.014278	0.0178852	0.587879	0.00640092	0	0.0577988	0	0	0.0486684	0.04	0.26354	0.995284
GSM2899381	Pattern A	0.0137537	0	0.00807539	0.125257	0	0	0	0.0288944	0.0568266	0	0.0348066	0	0.00469514	0.103625	0.00953371	0.387359	0.0271544	0	0	0.141415	0	0.0586042	0.2	0.108439	1.06198
GSM2899383	Pattern A	0.0155404	0	0.0107105	0.118433	0	0.000657786	0	0.0948877	0	0	0	0.0767272	0.149338	0	0.0374189	0.373656	0.0264676	0	0	0.0800845	0	0.0160782	0.54	0.0279046	1.08984
GSM2899385	Pattern A	0.0534488	0	0.0273189	0.115926	0.0618875	0	0	0.0170693	0	0	0.00614143	0.0238785	0.0873275	0	0	0.514598	0.0423762	0	0.0500284	0	0	0	0.24	0.0873418	1.0683
GSM2899386	Pattern A	0.0429635	0	0.0455019	0.10237	0	0.0238694	0	0.0235644	0	0	0	0.038627	0.169391	0	0.00813422	0.400491	0	0	0	0.120951	0	0.0241366	0.21	0.0972429	1.06089
GSM2899387	Pattern A	0.0466045	0	0.0596882	0.0872068	0	0.0334617	0	0.0267693	0	0	0	0.0482583	0.19286	0	0.0137269	0.415991	0	0	0	0.0541265	0	0.0213068	0.22	0.0932839	1.06323
GSM2899390	Pattern A	0.111016	0	0	0.0145516	0	0.146637	0	0.0284148	0	0	0	0.0807369	0.133101	0	0.00552098	0.233782	0.171237	0	0	0.0343494	0.0247743	0.0158796	0.06	0.20008	1.00366
GSM2899391	Pattern A	0	0.0125218	0.0155724	0.0930259	0	0.192106	0	0.0995698	0.0118951	0	0.125648	0.0346072	0.0630545	0	0.0174595	0.314048	0.0143405	0	0.00560059	0	0.000550582	0	0.18	0.116451	1.05777
GSM2899392	Pattern A	0.0387772	0	0	0.00262672	0	0.0646767	0	0.0120417	0.0173529	0	0.0996294	0	0.207296	0.0391922	0.00168149	0.345726	0	0.000663406	0.0396977	0.0612908	0.0190109	0.0503368	0.04	0.26309	0.986362
GSM2899394	Pattern A	0.0159526	0	0	0.0418901	0	0.042137	0	0.00505866	0	0	0	0.0256439	0.213438	0	0.00064883	0.429961	0.106453	0	0	0.118816	0	0	0	0.302581	0.975487
GSM2899395	Pattern A	0.0317851	0	0	0.0240776	0	0.0849467	0	0.0303353	0	0	0	0.0081988	0.166632	0	0.0231177	0.553628	0	0	0.0772781	0	0	0	0	0.400852	0.922428
GSM2899398	Pattern A	0.0362284	0	0.0346338	0.0294486	0	0.0449258	0.00262657	0.0444741	0.0285764	0	0.0481445	0	0	0.195465	0.0096913	0.462755	0	0.00182981	0	0.0206445	0.00609716	0.0344599	0	0.645002	0.772347
GSM2899401	Pattern A	0.053303	0	0	0.030128	0	0.0920797	0	0.0284297	0.0152722	0	0.0158191	0.0490334	0.0106915	0.146221	0.00747176	0.263992	0	0	0	0.264047	0	0.0235113	0.05	0.231531	1.01092
GSM2899402	Pattern A	0.0515933	0	0.138207	0.0296366	0	0.0790492	0	0	0	0	0.0340413	0.0354301	0.138056	0	0.000156021	0.389609	0	0.00102732	0	0.0976465	0	0.00554765	0.05	0.22233	1.00082
GSM2899404	Pattern A	0	0.0333373	0.0133867	0.117764	0	0.09151	0	0.00473116	0.0425702	0	0.0765479	0.0323836	0.0429068	0	0	0.386462	0.00119998	0.0120643	0.128027	0	0.00136549	0.0157433	0.15	0.13794	1.0315
GSM2899411	Pattern A	0	0.0126799	0.00908762	0	0.0213147	0.0335383	0	0.050592	0	0	0.00432796	0.0592486	0.058705	0	0.0481752	0.383981	0.163803	0	0	0.130753	0	0.023794	0.46	0.0398206	1.08859
GSM2899412	Pattern A	0.0192285	0	2.96398e-05	0.0221555	0	0.0991268	0	0.0373757	0	0	0	0.0455241	0.199964	0	0.0414327	0.365092	0	0	0.170071	0	0	0	0.07	0.184831	1.01304
GSM2899414	Pattern A	0	0.0611009	0.0394679	0.013016	0	0.0977842	0	0.0188607	0.056494	0	0.0624994	0.0918809	0.0562109	0	0	0.498955	0	0	0	0	0	0.00373047	0.32	0.0564536	1.08743
GSM2899415	Pattern A	0	0.127441	0.0337518	0	0	0.304715	0	0	0.0778524	0	0.118107	0.0427097	0.0731857	0	0.00596989	0.105572	0.0150909	0	0.0841358	0	0.0114683	0	0.63	0.0148985	1.08983
GSM2899416	Pattern A	0.0262853	0	0	0	0	0.187404	0	0.040087	0.0748845	0	0.0570341	0.00762585	0.0239372	0.119434	0.164277	0.15289	0.0127776	0	0.10692	0	0	0.0264442	0.33	0.0554975	1.07558
GSM2899418	Pattern A	0.0227813	0	0	0.0736666	0	0.0939293	0	0.000580005	0.0353001	0	0.0813333	0	0.090922	0	0.00512966	0.51797	0.0297566	0	0.0433617	0	0.00526895	0	0.06	0.213941	1.0128
GSM2899419	Pattern A	0	0.0155675	0.0118665	0.0321118	0	0.147005	0	0.00635851	0.0552631	0	0.0894342	0.00266381	0.197699	0	0.00244571	0.361779	0.0309703	0.0055481	0	0.00648244	0.0284392	0.0063657	0.12	0.151645	1.03356
GSM2899422	Pattern A	0	0.0142216	0.00137768	0.104941	0	0.0549195	0	0.0107136	0.0441377	0	0	0.0519881	0.131077	0.106667	0.00973238	0.363136	0.00275031	0	0.0668814	0	0	0.0374567	0.08	0.177784	1.02538
GSM2899424	Pattern A	0.04401	0	0.0281266	0.0278921	0	0.0483724	0	0.0286333	0	0	0	0.102028	0.256381	0	0.0203366	0.36873	0	0	0.0754905	0	0	0	0.43	0.0439562	1.08472
GSM2899433	Pattern A	0.0165376	0	0	0.0708327	0	0.115299	0	0.0298402	0.00667793	0	0.0826026	0.0143948	0.0312496	0	0.00860971	0.535194	0.00431797	0.00927321	0.055325	0	0	0.0198457	0.17	0.120167	1.05671
GSM2899439	Pattern A	0	0.00558877	0.00284095	0.0301722	0	0.0811564	0	0.0027458	0	0	0	0.0693472	0.116657	0	0.0150571	0.526668	0.000777762	0	0.0984655	0.0469811	0	0.0035418	0.04	0.260971	0.993379
GSM2899442	Pattern A	0.0514745	0	0.00912753	0.0399157	0	0.0747243	0	0	0.0340723	0	0.020085	0.0759179	0.163248	0	0	0.416732	0.0274256	0	0.036451	0.0301652	0	0.0206616	0.13	0.144134	1.04093
GSM2899447	Pattern A	0	0.00864521	0	0.0309069	0	0.0770799	0	0.0333271	0.0303448	0	0.0682551	0.00699275	0.0121126	0.1795	0.0216338	0.472236	0	0	0	0.0462862	0	0.0126799	0.18	0.11565	1.07717
GSM2899448	Pattern A	0.0237885	0	0.017074	0.0252981	0.00371663	0.00486853	0	0.0224342	0	0	0	0.10561	0.208885	0	0	0.408798	0.013106	0	0.0346088	0.117076	0	0.014737	0.06	0.208468	1.02214
GSM2899453	Pattern A	0.0630052	0	0.0205686	0.0682057	0	0.0919093	0.0117361	0.0147502	0.00946235	0	0.023492	0	0.104099	0	0.0173989	0.467731	0.0257688	0	0.0456952	0	0	0.0361771	0.01	0.283798	0.974147
GSM2899456	Pattern A	0.021066	0	0.0274191	0	0	0.136915	0	0	0.0393878	0	0.0446461	0.0170461	0.168402	0	0	0.437311	0	0.00828517	0	0.060649	0	0.0388741	0.49	0.0354016	1.09101
GSM2899457	Pattern A	0	0.0237091	0.0193277	0.0231853	0	0	0	0.109327	0	0	0	0.0525837	0	0.317739	0	0.445311	0	0	0	0.00881714	0	0	0	0.656018	0.756661
GSM2899459	Pattern A	0.0202218	0	0	0	0	0.0509965	0	0.0600935	0.0510475	0	0.0768219	0	0.0182987	0.367271	0.0266079	0.23785	0	0	0	0.0844608	0	0.00633093	0.05	0.236882	1.02191
GSM2899462	Pattern A	0.0465931	0	0	0.064685	0	0.0351538	0	0	0	0	0	0.0438914	0.144445	0	0	0.512365	0	0.00408232	0.129996	0	0	0.0187893	0.09	0.161684	1.03834
GSM2899463	Pattern A	0.0676824	0	0	0	0	0.102529	0	0.0248382	0.0724433	0	0.122087	0	0.0230005	0.220215	0	0.254658	0	0.0141255	0	0.0858053	0	0.0126152	0.14	0.141317	1.04464
GSM2899464	Pattern A	0.00502566	0.0136665	0	0.0495081	0	0.0993108	0.0425944	0.0167432	0	0	0	0.0596173	0.04663	0.0610934	0.00809071	0.379084	0.0133995	0	0	0.169495	0.0116429	0.024099	0.08	0.177236	1.02994
GSM2899465	Pattern A	0.0243625	0	0	0.0259103	0	0.0315567	0	0	0	0	0	0.0320295	0.127223	0	0.0119626	0.572049	0.00568213	0	0.126827	0.00658081	0	0.0358169	0.01	0.294915	0.981997
GSM2899468	Pattern A	0	0.00640554	0.00327145	0.0483259	0	0.0635865	0.0157207	0.00625707	0.0100917	0.00073585	0.0124012	0.0013662	0	0.133664	0.0376878	0.588526	0	0	0.054002	0	0	0.0179584	0	0.655561	0.760806
GSM2899476	Pattern A	0	0.0092108	0.0276667	0.0146305	0	0.169083	0	0.01501	0.0171802	0	0	0.135631	0.0303429	0	0	0.1978	0.00599765	0.0219555	0	0.338702	0	0.0167897	0.58	0.0225827	1.12719
GSM2899479	Pattern A	0	0.0453092	0	0.0194603	0	0.077186	0	0	0	0	0.0271865	0	0.168455	0	0.00552802	0.504713	0	0.00120965	0.133045	0.0129041	0	0.00500396	0.18	0.114014	1.06028
GSM2899480	Pattern A	0.0614584	0	0	0.00292077	0	0.154735	0	0.00548612	0	0	0.0839165	0	0.14118	0	0.00140233	0.43542	0	0.000204017	0.0276202	0.000375082	0	0.0852803	0.12	0.153237	1.04024
GSM2899481	Pattern A	0.0153292	0	0	0.0770248	0	0.138209	0	0.01314	0	0	0	0.0789911	0.0634638	0	0	0.220743	0.0101805	0	0	0.341809	0.02737	0.0137397	0	0.33871	0.957748
GSM2899482	Pattern A	0.0470354	0	0	0.0255159	0	0.160062	0	0.0440466	0	0	0	0.124192	0.102221	0	0.00321249	0.250838	0.0124953	0.000545817	0	0.208811	0.00737514	0.0136494	0	0.410159	0.914301
GSM2899488	Pattern A	0.0365421	0	0	0.106995	0	0.128598	0	0.00760233	0.0357535	0	0.0239811	0.0246752	0.0392576	0	0.0474143	0.478365	0.0115533	0	0	0.0401591	0.0148454	0.00425814	0.17	0.122751	1.0518
GSM2899489	Pattern A	0.0270576	0	0.000210046	0.0560298	0	0	0	0.033851	0	0	0	0.0356149	0.0997857	0	0.0155247	0.530266	0	0	0	0.191972	0	0.00968864	0.13	0.146653	1.06149
GSM2899490	Pattern A	0	0.0225585	0.0200553	0	0	0.183202	0	0.00484938	0.0764875	0	0.0646773	0	0	0	0.00643596	0.360464	0	0.0417693	0	0.136025	0	0.0834762	0.62	0.0161321	1.08543
GSM2899491	Pattern A	0.0683531	0	0.0913287	0.053819	0	0.237423	0	0	0	0	0.017284	0	0.0156499	0	0.037999	0.457094	0	0	0.0176718	0	0	0.00337751	0.06	0.199789	1.01107
GSM2899494	Pattern A	0.0260321	0	0	0.0642704	0	0.015289	0	0.0229622	0.0188653	0	0.00420259	0.015135	0.128105	0.0869434	0.00618223	0.413262	0.0452947	0	0.0498315	0.0445003	0	0.0591235	0.16	0.125617	1.05852
GSM2899498	Pattern A	0	0.0539876	0	0.010917	0	0.132323	0	0.00815513	0	0	0	0.0668625	0.156627	0	0.00187078	0.393765	0	0.0128777	0.0813459	0.0451553	0.011859	0.0242542	0.12	0.156423	1.02942
GSM2899499	Pattern A	0	0.0485151	0	0.0723025	0	0.178091	0	0.00860459	0.00230451	0	0.118687	0.0265746	0.109441	0	0.00131731	0.306192	0	0.00198225	0.0712988	0	0.01615	0.0385396	0.37	0.0516789	1.07101
GSM2899503	Pattern A	0	0.157112	0.0329889	0.0869874	0	0.133281	0	0.00361457	0.0342775	0	0.151623	0	0.0443768	0.0318939	0.0118157	0.259712	0	0	0	0.0523173	0	0	0.64	0.0136427	1.08494
GSM2899510	Pattern A	0.0359098	0	0.00436866	0.221511	0	0.0601728	0	0	0.011244	0	0	0.0317215	0	0	0.0968228	0.37765	0.0859684	0	0.0746307	0	0	0	0.15	0.135496	1.03924
GSM2899517	Pattern A	0.0159237	0	0	0.101618	0	0.0082957	0	0.0223693	0.0558639	0	0.103335	0	0.000195921	0.245867	0.00865214	0.22861	0	0	0	0.180096	0	0.0291732	0.06	0.196574	1.03022
GSM2899519	Pattern A	0.0512001	0	0	0.0948081	0	0.0233763	0	0.034657	0	0	0	0.0708511	0.0518395	0.137803	0.0353358	0.430102	0	0	0.0335902	0.00359972	0	0.032837	0	0.401684	0.920008
GSM2899522	Pattern A	0.122567	0	0.13516	0.112556	0	0.193858	0	0.0436194	0	0	0.0108745	0	0.0129461	0	0.0370808	0.294677	0	0	0	0.0240308	0	0.012631	0.12	0.155668	1.02713
GSM2899523	Pattern A	0.02666	0	0.0149073	0.0352682	0	0.124355	0	0.0115888	0	0	0.0686706	0.0015082	0.0834346	0	0.00365295	0.52611	0.0145065	0.00832507	0	0.0385894	0.0239795	0.0184434	0.04	0.259867	0.991578
GSM2899528	Pattern A	0.0554774	0	0	0.061132	0	0.123111	0	0	0.0532616	0	0.000267952	0.0360829	0.0357148	0	0.00391613	0.557096	0	0.00229671	0.0557934	0	0	0.0158499	0.26	0.0728553	1.08011
GSM2899530	Pattern A	0.05965	0	0	0	0	0.337152	0	0.019384	0.0522151	0	0.0430201	0.0698299	0.0417859	0	0.00321228	0.305578	0	0	0	0.0396398	0	0.0285336	0.53	0.0294993	1.09335
GSM2899531	Pattern A	0	0.0915211	0.0215442	0	0	0.139205	0	0	0	0	0.0428902	0	0.224367	0	0.00842467	0.404862	0	0.00153323	0	0.0397769	0	0.0258757	0.46	0.0390985	1.08839
GSM2899532	Pattern A	0.0161011	0	0	0	0	0.121728	0	0.0383715	0.0665766	0	0.046722	0.00748183	0.00556428	0.330612	0.0112324	0.233781	0	0	0	0.119918	0	0.00191199	0	0.311472	0.976412
GSM2899533	Pattern A	0	0.0114566	0	0.0378153	0	0.182869	0	0.023582	0	0	0.16766	0	0.0871911	0	0.00422895	0.309713	0	0.00214156	0	0.146087	0	0.0272569	0.56	0.0257963	1.09169
GSM2899539	Pattern A	0.0961573	0	0.0476339	0	0	0.127155	0	0.0913051	0	0	0	0.155556	0.103921	0	0	0.184708	0	0.00142506	0	0.192139	0	0	0.12	0.151014	1.0429
GSM2899540	Pattern A	0	0.0511395	0.019885	0.100234	0	0.107087	0	0.0199838	0.0118429	0	0.027244	0.0229232	0.0433932	0	0.0120464	0.509199	0.0347072	0	0	0.0108017	0	0.0295128	0.22	0.0935527	1.06665
GSM2899542	Pattern A	0.0259512	0	0	0.0136224	0	0.0447685	0	0	0	0	0.0245193	0	0.099079	0	0.0100563	0.609927	0	0	0.0668015	0	0.0567201	0.0485543	0	0.499157	0.867174
GSM2899543	Pattern A	0.00730099	0	0.000668273	0.0387332	0	0.0227315	0	0.012509	0.0350331	0	0.116671	0	0.127054	0.290447	0.00411355	0.144834	0	0	0	0.152886	0.012608	0.0344102	0.05	0.241713	1.00968
GSM2899544	Pattern A	0	0.0286808	0.00295095	0.0632541	0	0.13562	0	0	0	0	0.0561153	0	0.145646	0	0	0.472731	0	0	0	0.0212943	0.0194705	0.0542377	0.22	0.0958494	1.07036
GSM2899548	Pattern A	0.0275342	0	0	0.0194307	0	0.036138	0	0.0315958	0	0	0	0.0308398	0.246569	0	0.0362286	0.440746	0	0	0.0253333	0.0869912	0.0175079	0.00108506	0	0.385922	0.929829
GSM2899549	Pattern A	0.0251617	0	0	0.0644808	0	0.0516587	0	0.0370484	0	0	0	0.0857628	0.00967047	0	0.00439027	0.50374	0.0146645	0	0	0.172285	0	0.0311369	0.05	0.23218	1.01312
GSM2899550	Pattern A	0.0264943	0	0	0	0.0612414	0.0673563	0	0.185906	0	0	0	0.14947	0.0464302	0	0.0376167	0.223871	0.0710412	0	0	0.130573	0	0	0.8	-0.0119194	1.11336
GSM2899551	Pattern A	0	0.200403	0.0507335	0	0	0.153906	0	0.0122182	0.00253793	0	0	0.100364	0.045447	0	0	0.361978	0	0	0.0400891	0.0323237	0	0	0.63	0.0153073	1.08418
GSM2899552	Pattern A	0.0421572	0	0	0.0501397	0.0154708	0.0314748	0	0	0	0	0.0243641	0.0147606	0.213367	0	0	0.407774	0.0583236	0	0	0.142168	0	0	0.16	0.130527	1.05558
GSM2899553	Pattern A	0	0.0411943	0.00699312	0.0334134	0	0.0117554	0	0.0399979	0.00184638	0	0	0.0354191	0	0.384426	0.00655013	0.175231	0	0	0	0.224133	0.0162138	0.0228265	0	0.590768	0.806593
GSM2899554	Pattern A	0	0.0852346	0.00899229	0.0794138	0	0.105278	0	0	0	0	0	0.0537567	0.0230319	0	0	0.546587	0	0.00609579	0	0.0869067	0	0.00470313	0.21	0.103013	1.06895
GSM2899555	Pattern A	0.0440125	0	0	0.0720915	0	0.0280497	0	0.0144784	0	0	0	0.0602787	0.0909014	0	0.00586529	0.494626	0.0702034	0	0.0896972	0.00759166	0	0.0222046	0.06	0.200371	1.01799
GSM2899586	Pattern A	0	0.0664511	0.00167345	0.0780987	0	0.105043	0	0.0247962	0	0	0	0.0233542	0.118302	0	0.0379341	0.34861	0.0446172	0	0.15112	0	0	0	0.17	0.11923	1.03236
GSM2899587	Pattern A	0	0.0263723	0.00406149	0.0444931	0.0136037	0.0671613	0	0	0	0	0	0.0702608	0.194707	0	0.0133841	0.257254	0.0674179	0	0.241285	0	0	0	0.21	0.103687	1.03771
GSM2899588	Pattern A	0.0700892	0	0	0.0770642	0	0.056782	0	0.131124	0.0036199	0	0.00824082	0.0733421	0.0269153	0	0.00937578	0.402752	0.023983	0	0.112733	0	0	0.0039786	0.2	0.105565	1.04615
GSM2899589	Pattern A	0.125152	0	0	0.100413	0	0	0	0.118646	0	0	0	0.108398	0.174143	0	0	0.298049	0	0	0.0751996	0	0	0	0.79	-0.00983233	1.09609
GSM2899590	Pattern A	0.102546	0	0.0111447	0.0749842	0	0.12553	0	0	0.0671561	0	0.046696	0.024414	0.0481463	0	0.0110876	0.415211	0.0028785	0	0.0702054	0	0	0	0.26	0.0718347	1.06121
GSM2899591	Pattern A	0.0199758	0.0119548	0	0.0726981	0	0.0655462	0	0.0685649	0	0	0	0.0325952	0.141698	0	0.0342004	0.402586	0	0	0	0.150181	0	0	0.17	0.122768	1.05009
GSM2899592	Pattern A	0	0.0474229	0.0528894	0.0225389	0.0110427	0.082942	0	0	0.0262881	0	0.0141481	0.119014	0.120969	0	0.0196	0.244869	0.122104	0	0	0.0817619	0.0305688	0.00384112	0.71	0.00386381	1.08715
GSM2899593	Pattern A	0	0.023689	0.0047559	0.0213373	0	0.0968434	0	0.0287024	0	0	0.0188047	0.0363174	0.0821388	0	0.0085618	0.119354	0.0323989	0	0	0.526626	0.000471184	0	0	0.599294	0.800324
GSM2899594	Pattern A	0	0.183954	0.0296941	0.172179	0	0.106121	0	0.08668	0.0929458	0	0.0232826	0.0188334	0.015316	0	0	0.183784	0.0218106	0	0	0.0654001	0	0	0.77	-0.0026505	1.10194
GSM2899595	Pattern A	0.0164697	0	0.00274897	0.0447106	0	0.120749	0	0.0549194	0	0	0.00108604	0.0695663	0.15759	0	0	0.141747	0.0604283	0	0	0.329985	0	0	0.05	0.246074	1.00077
GSM2899596	Pattern A	0.0646254	0	0	0.047122	0	0.217258	0	0	0.115892	0	0.131693	0	0.0758093	0.143657	0.0192684	0.152253	0	0	0	0.0324204	0	0	0.9	-0.0257646	1.11151
GSM2899597	Pattern A	0.0435912	0	0	0	0.0635823	0.0102979	0	0.0511827	0	0	0	0.0575764	0.235126	0	0	0.245093	0.0446762	0	0.0939321	0.154942	0	0	0.18	0.116446	1.04617
GSM2899600	Pattern A	0.0811161	0	0.00607229	0.0702032	0	0.13733	0	0.0117017	0.0140391	0	0.0468295	0.0358438	0.0221763	0	0	0.539317	0	0	0.0103099	0	0	0.025061	0.19	0.112742	1.06241
GSM2899601	Pattern A	0.0135143	0	0	0.00993595	0	0.0259254	0	0.00113995	0	0	0	0.0172448	0.122913	0	0.00796322	0.682078	0	0	0.112023	0	0	0.0072634	0	0.506013	0.865721
GSM2899602	Pattern A	0.00811529	0.00171877	0.00240151	0.0298947	0.00738726	0	0	0.00950076	0.00943337	0	0	0.0363382	0.0901265	0.0349912	0.0191705	0.578261	0.033722	0	0.104969	0.0266535	0	0.00731698	0.02	0.27765	0.993838
GSM2899603	Pattern A	0.143529	0	0	0.0876789	0	0.0971167	0	0	0.0656612	0	0	0.148899	0.0820207	0	0	0.184216	0.0995105	0	0	0.0913685	0	0	0.67	0.0082615	1.10009
GSM2899604	Pattern A	0.011263	0	0.00714785	0.0490031	0	0.109342	0	0.00840751	0.0101489	0	0	0.0733155	0.0267305	0	0.00633126	0.0466101	0.0548576	0	0	0.587019	0.00471763	0.00510612	0	0.554097	0.839018
GSM2899605	Pattern A	0	0.0826727	0.0127976	0.0100191	0	0.0900618	0	0	0.0212709	0	0.010261	0.0581362	0.11307	0	0	0.245414	0.0331316	0.0089262	0.274893	0.0270608	0	0.0122847	0.08	0.178717	1.00312
GSM2899606	Pattern A	0	0.0377135	0	0	0	0.0923589	0	0.056475	0	0	0	0.0986634	0.272266	0	0	0.311983	0	0	0.13054	0	0	0	0.38	0.050075	1.076
GSM2899608	Pattern A	0.00929149	0	0.00441264	0.0221612	0.00780139	0.0629014	0	0.0215679	0.0133574	0	0.0927611	0.0399522	0.0499324	0	0.00480945	0.112524	0.0996843	0	0	0.4425	0.00963061	0.00671269	0	0.48744	0.875642
GSM2899609	Pattern A	0	0.131685	0	0.123542	0	0.0901821	0	0.0578533	0.00963091	0	0	0.204063	0.0679118	0	0.00638921	0.308742	0	0	0	0	0	0	0.98	-0.0394456	1.14444
GSM2899610	Pattern A	0	0.0155082	0.00597916	0	0	0.095071	0	0.0172312	0.0288151	0	0.0294908	0.0226963	0.0178541	0	0.00196322	0.190949	0.00583917	0	0	0.568249	0	0.000353619	0.02	0.28042	1.0222
GSM2899611	Pattern A	0	0.0282054	0.00828504	0.215996	0	0	0	0.0393668	0.0890052	0	0	0.0979308	0.0962665	0	0.00495168	0.116864	0.124907	0	0	0.0851727	0	0.0930477	0.2	0.109375	1.05399
GSM2899617	Pattern A	0	0.151017	0.0682326	0	0.157997	0	0	0.0883813	0	0	0	0.208301	0.0347663	0	0	0.131155	0	0	0	0.160149	0	0	0.7	0.00434837	1.12497
GSM2899618	Pattern A	0	0.0336544	0.113342	0	0.236219	0	0	0.0066419	0.0503688	0	0	0.10955	0.0357112	0	0	0.352336	0	0	0	0.0621771	0	0	0.8	-0.011675	1.10065
GSM2899620	Pattern A	0	0.0342503	0	0	0	0.247188	0	0.0182509	0.0336757	0	0	0.179354	0.0272616	0	0.112092	0.245264	0.0653338	0	0	0.017706	0.0196238	0	0.95	-0.0310802	1.13412
GSM2899621	Pattern A	0.101617	0	0	0.0777759	0	0.0853427	0	0	0	0	0	0.0806627	0.101682	0	0	0.457091	0	0	0.05398	0.0360453	0	0.00580321	0.26	0.0733318	1.07163
GSM2899622	Pattern A	0.0277407	0	0	0.0517218	0	0.129047	0	0	0.082711	0	0.00181171	0.0672366	0.0814334	0	0.00746087	0.40987	0	0	0.136256	0	0	0.00471037	0.54	0.0284813	1.07858
GSM2899629	Pattern A	0	0.01606	0.0171407	0	0.00973556	0.119556	0	0	0.0686803	0	0.230539	0.0410557	0.124859	0	0	0.256395	0.0585367	0	0.0574418	0	0	0	0.15	0.132342	1.04913
GSM2899630	Pattern A	0	0.0342596	0.000572646	0.0121811	0	0.115145	0	0.0189811	0.0269474	0	0.0421055	0	0.0966823	0	0.0216212	0.340395	0.000301364	0	0	0.241735	0.0114586	0.0376154	0.31	0.0582791	1.07792
GSM2899631	Pattern A	0.00873163	0.00491748	0	0.0507225	0	0.144299	0	0	0.0313863	0	0.0639049	0	0.168828	0	0.0212024	0.386537	0	0.000821035	0.0249363	0.0741279	0.00137216	0.0182137	0.32	0.0562225	1.07452
GSM2899632	Pattern A	0	0.034687	0.027459	0.00474301	0	0.0865589	0	0	0.0457726	0	0.146721	0	0.0156914	0.0403071	0	0.42613	0	0	0	0.108995	0	0.0629353	0.23	0.0898839	1.06702
GSM2899636	Pattern A	0	0.120956	0.0368856	0.0363935	0	0.30158	0	0	0.0164319	0	0.00944755	0.076119	0.0974793	0	0	0.152296	0.0250926	0	0	0.127319	0	0	0.33	0.0545932	1.07045
GSM2899638	Pattern A	0	0.122149	0	0.00952148	0.0514197	0.141041	0	0	0.123206	0	0.00929613	0.0701992	0.049649	0	0	0.287815	0.0474497	0	0	0.0520075	0	0.0362464	0.6	0.0191585	1.08316
GSM2899639	Pattern A	0	0.0206159	0.0103305	0.0206084	0	0.108459	0	0	0.0148343	0	0	0.081378	0.152493	0	0.00429401	0.275391	0.0376439	0	0	0.265203	0	0.0087482	0.14	0.142764	1.04946
GSM2899640	Pattern A	0.0648092	0	0	0.0187245	0	0.18679	0	0	0.0677838	0	0	0.126428	0.162078	0	0.00930501	0.186096	0.0928834	0	0.0203113	0.0647908	0	0	0.63	0.0148022	1.08718
GSM2899641	Pattern A	0.00269412	0.0247138	0.0013779	0.0289939	0	0.198523	0	0	0.0556937	0	0.065612	0.0122336	0.0795989	0	0.0185354	0.459278	0	0	0.0151442	0.0013132	0	0.0362882	0.34	0.0541534	1.08116
GSM2899642	Pattern A	0.128456	0	0	0.0319822	0	0.0457107	0	0	0.0284855	0	0.0196584	0.0019271	0	0	0.0725027	0.521682	0.0325814	0	0.0629147	0	0	0.0540984	0.3	0.0618697	1.08361
GSM2899644	Pattern A	0.0160273	0	0	0.0457269	0	0.197594	0	0.0680581	0	0	0	0.0627228	0.122315	0	0.0802641	0.346838	0	0	0	0.0604542	0	0	0.53	0.0306185	1.0874
GSM2899645	Pattern A	0	0.0222265	0	0.00065942	0	0.100737	0	0.0357361	0.010689	0	0	0.0420382	0.0735383	0	0	0.0712864	0.0152889	0	0	0.611504	0.000949212	0.0153473	0	0.579395	0.819024
GSM2899647	Pattern A	0.084148	0	0	0	0	0.0824045	0	0	0.0147949	0	0	0.0451158	0.171572	0	0.00740524	0.331018	0.0737158	0	0.181929	0	0	0.00789706	0.05	0.244397	0.984943
GSM2899648	Pattern A	0	0.130928	0.0473908	0	0.108975	0.130822	0	0.0168246	0	0	0	0.134809	0	0.098591	0.00698536	0.324674	0	0	0	0	0	0	0.44	0.0422409	1.0852
GSM2899650	Pattern A	0	0.0293999	0	0.0413559	0	0.137543	0	0.0410495	0.0208065	0	0.0416463	0.0292554	0.0145859	0.250278	0.0026329	0.347431	0	0	0.0396447	0	0	0.00437086	0.06	0.212556	1.02127
GSM2899652	Pattern A	0	0.0925443	0.00793142	0.00156759	0.00067213	0.0509819	0	0.0290098	0.00846268	0	0	0.0484394	0.0785132	0	0.0191365	0.146767	0.0715118	0	0	0.444462	0	0	0.05	0.23867	1.01733
GSM405202	Pattern A	0.0913506	0	0.0236551	0.14865	0	0.025981	0	0.014993	0	0	0	0.0414499	0.107555	0	0.0454434	0.322594	0.129867	0	0	0.0474051	0.00105558	0	0	0.434131	0.899966
GSM405203	Pattern A	0.0212055	0	0	0.140442	0	0	0	0.0443501	0	0	0	0.0785727	0.1085	0	0.0386211	0.349663	0.137648	0	0.036191	0.0264478	0	0.0183585	0.12	0.153458	1.03052
GSM405204	Pattern A	0.106964	0	0	0	0.0363393	0.0175194	0	0.00628673	0.0512947	0	0.103236	0.0327699	0.0234013	0	0.0174419	0.457964	0.0953426	0	0.0514411	0	0	0	0.24	0.0867357	1.06285
GSM405205	Pattern A	0	0.0299926	0.0264493	0.0104001	0	0.00603956	0.114473	0.0209592	0	0	0	0.0175238	0.0113401	0.0331366	0.0425513	0.451718	0.143881	0	0.0211646	0.0277896	0	0.0425809	0	0.311732	0.963696
GSM405206	Pattern A	0	0.0631102	0.0139121	0.0446936	0	0.0600821	0	0	0.0448388	0	0	0.0599853	0.0301024	0	0	0.218194	0.0759279	0	0	0.310895	0	0.0782585	0.14	0.141897	1.04745
GSM405207	Pattern A	0	0.143294	0	0.154338	0	0	0	0.10969	0	0	0.0158961	0.090909	0.0901521	0	0	0.379276	0	0	0.0164448	0	0	0	0.83	-0.0180308	1.10757
GSM405208	Pattern A	0	0.115814	0.0588843	0.062	0	0.0888839	0	0	0.12104	0	0	0.162671	0.0704791	0	0	0.320228	0	0	0	0	0	0	0.99	-0.0481834	1.12799
GSM405211	Pattern A	0.0315946	0	0	0.0306489	0	0.0329266	0	0.0101996	0	0	0	0.0343487	0.000703468	0.0109535	0.0099559	0.56172	0.174379	0	0	0.10257	0	0	0	0.449649	0.897822
GSM405212	Pattern A	0	0.108461	0.0286316	0.107418	0.00660535	0	0	0.0928286	0	0	0	0.0963163	0.169314	0.0985815	0	0.142155	0	0	0	0.039048	0	0.11064	0.42	0.0459071	1.08129
GSM405213	Pattern A	0.0129816	0	0	0.0271455	0	0.00945346	0	0.0262689	0	0	0	0.033827	0	0.201092	0.0263469	0.575083	0	0	0.0113354	0.0533226	0	0.0231437	0	0.627422	0.778385
GSM405217	Pattern A	0.0318528	0	0	0.195698	0	0.0230442	0	0.0266962	0.0118599	0.00554873	0	0	0.184394	0	0.0518802	0.408446	0.0149166	0	0.0117782	0	0.015757	0.0181287	0	0.410325	0.913194
GSM405219	Pattern A	0	0	0.0192582	0.0480137	0	0.146048	0	0	0	0	0.0220804	0.0112099	0.104068	0	0.0215312	0.432056	0	0.00406011	0.132159	0.0318998	0	0.0276145	0.15	0.133814	1.03651
GSM405221	Pattern A	0.0210696	0	0	0.0511025	0	0.0496124	0	0.0219749	0.055084	0	0.0577096	0	0	0.372203	0.00200035	0.242711	0	0	0	0.113703	0	0.0128304	0	0.334763	0.970199
GSM405222	Pattern A	0	0.126168	0.0285529	0	0.0097392	0.0741494	0	0	0	0	0	0.0789123	0.115124	0	0	0.423106	0.00295878	0.00943014	0	0.0792331	0	0.0526272	0.25	0.0810327	1.06976
GSM405223	Pattern A	0	0.163543	0	0.0042538	0	0.103569	0	0.00702841	0.000231172	0	0	0.0347071	0.136207	0	0.0197152	0.404886	0	0.00977341	0.0697999	0.046286	0	0	0.54	0.0289333	1.07978
GSM405224	Pattern A	0	0.0215555	0.00357955	0.00315995	0	0.0855694	0	0.0102085	0	0	0.000934926	0.0509598	0.0672405	0	0.0122315	0.242248	0.151711	0	0	0.303327	0	0.0472747	0.05	0.25028	0.997715
GSM405225	Pattern A	0	0.0189972	0.0226356	0.0762082	0	0.111101	0	0	0.0310525	0	0.0131156	0.0563122	0.0738874	0	0.00476883	0.456264	0.0649273	0	0.0402541	0.030477	0	0	0.16	0.131657	1.04398
GSM405226	Pattern A	0.0553402	0	0.00405601	0	0	0.101553	0	0.0390051	0	0	0	0.0537528	0.116804	0	0.00275753	0.359986	0	0	0	0.266746	0	0	0.31	0.0574315	1.08953
GSM405227	Pattern A	0	0.104778	0.00413657	0	0.172189	0	0	0.0340265	0	0	0	0.0880129	0.0123991	0	0	0.516749	0.0677096	0	0	0	0	0	0.79	-0.00621359	1.11502
GSM405228	Pattern A	0.0105884	0	0.00929471	0.0120734	0	0.0292076	0	0.0492111	0	0	0	0.0224913	0.0894672	0.110281	0.00690189	0.25694	0	0	0	0.36415	0.018676	0.0207173	0	0.392772	0.93245
GSM405229	Pattern A	0	0.0367781	0.0118235	0.162741	0	0.0430449	0	0.0883237	0.0178667	0	0.0732287	0	0.0649321	0	0.0101508	0.394406	0.00015042	0.0048975	0.0336472	0.00496164	0.046791	0.00625573	0.67	0.00820851	1.08917
GSM405233	Pattern A	0.0171817	0.00898975	0	0.0312768	0	0	0	0.0290157	0.0147355	0	0.0101855	0	0	0.252283	0.00692278	0.498511	0	0	0.000913115	0.072202	0.0195964	0.0381864	0	0.473417	0.890192
GSM405235	Pattern A	0.0944847	0	0	0.0292807	0	0.0785874	0	0.0133701	0.00628273	0	0	0.0323597	0.18521	0	0.0246447	0.385127	0.00601344	0	0	0.118874	0.0101573	0.0156082	0.05	0.248929	0.99253
GSM405236	Pattern A	0.00183327	0.00422155	0.0159616	0.0569638	0	0.164683	0	0.0812592	0	0	0.0645271	0	0.0412193	0.0919834	0.0131606	0.282537	0.0419996	0	0	0.106665	0	0.0329853	0.21	0.102092	1.05094
GSM405237	Pattern A	0.0101061	0.0146839	0	0.0192384	0	0.0613793	0	0	0	0	0.0246376	0.0275981	0.248664	0	0	0.440217	0	0.00412839	0.14548	0	0.00108374	0.00278349	0.19	0.1137	1.06056
GSM405238	Pattern A	0.0337036	0	0	0.0350784	0	0.0603268	0	0	0	0	0	0.0723892	0.184448	0	0	0.453208	0	0	0.160846	0	0	0	0.12	0.156454	1.03589
GSM405240	Pattern A	0.0739846	0	0.0862524	0	0	0.121736	0	0	0	0	0.0372008	0	0.0948485	0.0151966	0.0044904	0.383303	0	0	0	0.164687	0	0.0183004	0.06	0.190722	1.01457
GSM405241	Pattern A	0.100511	0	0.0941588	0.0871926	0	0.0404246	0	0.039936	0	0	0	0.055762	0.0419868	0	0.00765031	0.344778	0.0841614	0	0	0.0598865	0.00339561	0.0401559	0.13	0.149891	1.02584
GSM405243	Pattern A	0	0.00556568	0.00291651	0.0615216	0	0.0724662	0	0.0242164	0	0	0	0.032985	0.205297	0	0.00925292	0.312744	0	0.00271062	0	0.163772	0.063526	0.0430268	0	0.351421	0.943804
GSM405244	Pattern A	0.0503169	0	0	0.0605146	0	0.0350202	0	0	0.0854077	0	0	0.153479	0.0451132	0	0.00286944	0.289698	0.10104	0	0	0.159317	0.00518397	0.0120396	0	0.40548	0.917376
GSM405245	Pattern A	0.0641877	0	0.0624504	0.0574735	0	0.0868583	0	0.00977119	0.021263	0	0.0410427	0	0.0991505	0	0.0353456	0.393395	0.0443747	0	0.0649987	0	0	0.019689	0	0.364121	0.932374
GSM405246	Pattern A	0	0.107225	0.00991111	0.246008	0	0	0	0.139622	0	0	0.0670642	0.0749503	0.0331412	0	0	0.194465	0.062509	0	0	0.0651036	0	0	0.99	-0.0905135	1.14913
GSM405248	Pattern A	0.0167914	0	0.0252777	0.0495087	0	0.13301	0	0.0152629	0.0144303	0	0.0229461	0.0166982	0.0143545	0.135727	0.0204775	0.488797	0	0.00903308	0.0376857	0	0	0	0.17	0.121786	1.06316
GSM405249	Pattern A	0.0889036	0	0	0.00771134	0	0.124119	0	0	0.0119047	0	0	0.0724751	0.23606	0	0.019526	0.254148	0	0	0.13814	0.0470117	0	0	0.2	0.105777	1.04282
GSM405251	Pattern A	0	0.0355032	0.00360308	0.0257444	0	0.107362	0	0.000429236	0.0263849	0	0	0.0817744	0.0934402	0	0.00468689	0.346151	0.0228981	0	0.142367	0.109656	0	0	0.04	0.256268	0.982542
GSM405252	Pattern A	0	0	0.00837244	0.0242368	0	0.0532666	0	0.0155304	0	0	0	0.016849	0.157536	0	0.00615072	0.351955	0	0	0	0.315215	0.0117673	0.0391206	0.15	0.132222	1.0679
GSM405255	Pattern A	0.0833537	0	0.0231398	0.0893275	0	0	0	0.0099716	0.0212119	0	0	0.000797449	0.0349275	0.0502458	0.0218259	0.454187	0.0183359	0	0	0.119987	0	0.0726898	0.05	0.224871	1.00897
GSM405258	Pattern A	0.10713	0	0	0.0426211	0	0.130231	0	0	0.0633341	0	0.0372372	0.056838	0.0985538	0	0.0041516	0.244426	0.0501721	0	0	0.150641	0	0.0146632	0.05	0.221279	0.997689
GSM405261	Pattern A	0.0475501	0	0	0	0	0.103926	0	0	0	0	0	0.0635893	0.135758	0	0.0198243	0.445251	0.0585677	0	0.0753305	0.0322295	0.0179741	0	0.18	0.116472	1.05265
GSM405263	Pattern A	0.100732	0	0	0.0351722	0	0.0399338	0	0.0158522	0.0458076	0	0.0394413	0.00376526	0	0.232432	0.00593092	0.455243	0	0.000955006	0.00813475	0.00827077	0	0.00832944	0	0.313784	0.976579
GSM405264	Pattern A	0.0235201	0	0.010646	0.104268	0	0.126843	0	0.0123225	0.0786421	0	0.0349591	0.0146488	0.0489433	0.112676	0.0355029	0.254407	0	0	0.0162245	0.0542107	0	0.0721853	0.21	0.0999	1.05302
GSM405265	Pattern A	0.0218641	0	0.00581418	0.107753	0	0	0	0.0279715	0	0	0	0.0672547	0.146686	0	0.00762156	0.357403	0	0	0	0.231001	0.0266307	0	0	0.415861	0.912341
GSM405266	Pattern A	0	0.00515636	0	0.0192359	0	0.101691	0	0	0.0334205	0	0.0222755	0.0201812	0.159861	0	0.0138199	0.442343	0	0.00648771	0.102414	0.0180093	0.0443476	0.0107563	0.08	0.173171	1.0255
GSM405268	Pattern A	0.0392721	0	0	0.00672552	0	0.045034	0	0.000957543	0	0	0	0.0247919	0.17004	0	0.139083	0.417633	0.000109684	0	0.143074	0	0.0105591	0.00272044	0	0.401011	0.920178
GSM405269	Pattern A	0.0275215	0	0.00141529	0.0253467	0	0.060864	0	0.0167442	0.033152	0	0	0.0281707	0.0331953	0.120127	0.0101279	0.425563	0.0404248	0	0.14684	0	0	0.0305074	0.01	0.285243	0.976348
GSM405270	Pattern A	0.00472977	0.0219967	0.000773108	0.105061	0	0	0	0.0161966	0.0339734	0	0.0262877	0	0.000130202	0.177107	0.00623093	0.560224	0	0.00334963	0.0244924	0.000266442	0	0.0191809	0.01	0.282578	1.00002
GSM405271	Pattern A	0.0508176	0	0.0149469	0.073166	0	0.0386668	0	0	0	0	0.0320382	0.0246575	0.0180725	0	0.00363532	0.447849	0.0472555	0	0	0.173407	0.0117899	0.0636977	0.2	0.110374	1.06183
GSM405273	Pattern A	0.0283103	0	0	0.0208557	0	0.0801384	0	0.0051908	0	0	0	0.0408161	0.231315	0	0.0325024	0.426937	0	0	0.128884	0	0.00505002	0	0.24	0.0872292	1.06776
GSM405274	Pattern A	0	0.0172617	0	0.00213072	0	0.0698138	0	0	0.00146471	0	0.0392366	0	0.120806	0.198052	0.00962937	0.243129	0	0	0	0.272045	0	0.0264306	0.05	0.239594	1.0159
GSM405275	Pattern A	0	0.0113125	0.0108472	0.0203638	0	0.0954775	0	0.000821338	0.017502	0	0.0229088	0.0457517	0.186537	0	0	0.469003	0.0127814	0	0.101709	0	0	0.00498545	0.08	0.178385	1.02829
GSM405276	Pattern A	0	0.0222742	0	0.0186862	0	0.0287562	0	0.0183899	0.0198613	0	0.0101696	0.00227145	0	0.203293	0.00487847	0.498895	0	0	0.129669	0	0.0230059	0.0198503	0	0.304504	0.983476
GSM405277	Pattern A	0.0392149	0	0	0.0459703	0	0.0567725	0.101773	0.00591504	0	0	0.0308208	0.0911759	0.106936	0	0.0210521	0.331328	0.000170977	0.00338103	0.161748	0	0	0.00374052	0	0.339199	0.943521
GSM405280	Pattern A	0.0545162	0	0	0.0284196	0	0.0840997	0	0	0.0133771	0	0.00651693	0.0301791	0.0601583	0.000256274	0.00364629	0.619681	0	0	0.045776	0.0417988	0	0.0115746	0.04	0.255908	1.00342
GSM405281	Pattern A	0.0778883	0	0	0.0607146	0	0.0332676	0	0.00384998	0.0360894	0	0	0.0314733	0.167957	0	0.00444911	0.430736	0	0	0.153575	0	0	0	0.05	0.251065	0.987151
GSM405282	Pattern A	0.0410667	0	0	0.0305807	0	0.0131549	0	0.0282202	0.0163982	0	0	0.047228	0.0819568	0.124864	0.0192036	0.445501	0	0	0	0.137424	0.00859971	0.00580153	0.07	0.186765	1.03901
GSM405283	Pattern A	0	0.0770989	0.00725308	0.0435704	0.0157384	0	0	0.161143	0	0	0	0.0992123	0.00690914	0	0.023457	0.294637	0.203649	0	0	0.0673311	0	0	0.83	-0.0176664	1.09683
GSM405287	Pattern A	0	0.0603765	0	0.118137	0	0	0	0.139865	0	0	0	0.0732924	0.00935229	0	0.0126208	0.124268	0.19651	0	0	0.265579	0	0	0.24	0.0835231	1.0647
GSM405290	Pattern A	0.0256063	0	0	0.0136675	0	0.0423106	0	0.0602884	0	0	0	0.0735184	0.016521	0	0.0115885	0.536621	0.0992087	0	0	0.0881413	0	0.0325278	0.24	0.0850181	1.08494
GSM405291	Pattern A	0.0365554	0	0.00788858	0.0204443	0	0.0341821	0	0	0	0	0	0.0258846	0.277896	0	0.00279141	0.428237	0.0189337	0	0.147187	0	0	0	0.05	0.236653	1.00572
GSM405294	Pattern A	0.0382357	0	0	0	0	0.159806	0	0.0226746	0.0449462	0	0.108181	0	0.0194551	0.350132	0.0112018	0.13912	0	0	0	0.106247	0	0	0.06	0.19209	1.03494
GSM405295	Pattern A	0.0199478	0	0.025792	0.17766	0	0	0.00749841	0.00779774	0.0355811	0	0	0.00236291	0.0897425	0	0.0281797	0.564041	0	0	0.0413963	0	0	0	0	0.376797	0.933316
GSM405296	Pattern A	0	0.00654666	0	0.0122504	0	0.2546	0	0.0475769	0	0	0	0.0897617	0.0957688	0.0156778	0	0.424216	0	0	0	0.0342792	0.00332522	0.0159981	0.33	0.0549554	1.08644
GSM405297	Pattern A	0.0238799	0	0	0.0293783	0	0.123979	0	0.0356578	0.0621959	0	0.0129576	0.0851484	0.0680692	0	0.0211766	0.377454	0.0649851	0	0	0.0707159	0.00654197	0.01786	0.17	0.122555	1.04688
GSM405298	Pattern A	0	0.0220918	0.0120396	0	0	0.0917532	0	0.0235814	0.0118356	0	0.0130223	0.0400049	0.0752103	0	0.000949094	0.0887779	0.0602794	0	0	0.542751	0.00707113	0.0106325	0	0.420555	0.926156
GSM405300	Pattern A	0.0269836	0	0.00678518	0.0268598	0	0	0	0.0141596	0.0162758	0	0	0.0554236	0.0477577	0	0	0.572919	0.00279143	0	0	0.22516	0	0.00488495	0	0.319301	0.978095
GSM405301	Pattern A	0.0221386	0	0.000538203	0.00590909	0	0.0446553	0	0.0638415	0	0.025567	0	0.0175643	0.0855087	0	0.0784053	0.269874	0.159808	0	0	0.191397	0	0.0347929	0.06	0.199162	1.01225
GSM405302	Pattern A	0	0.0313293	0	0	0	0.169171	0	0.0450761	0.111447	0	0.133095	0	0.0353911	0.0247892	0.00357662	0.414036	0	0	0	0.0153384	0	0.0167506	0.49	0.0359364	1.08987
GSM405304	Pattern A	0	0.0395744	0	0.0663801	0	0.100514	0	0.0359421	0	0	0	0.117166	0.0113692	0.0128082	0	0.4435	0	0.00223987	0.102153	0.0642429	0	0.00410868	0.34	0.0541808	1.0816
GSM405305	Pattern A	0	0.0120514	0.000806375	0.0412375	0	0.041142	0	0	0	0	0.00850882	0.01529	0.149842	0	0.00350361	0.576049	0	0	0.119086	0	0	0.0324827	0.05	0.245848	1.00924
GSM405306	Pattern A	0	0.0236171	0.00268532	0.0157972	0	0.124412	0	0.0391077	0	0	0	0.0517109	0.0520692	0	0	0.0321825	0.0164655	0	0	0.634222	0.00773139	0	0	0.659421	0.752119
GSM405309	Pattern A	0.107819	0	0	0.0454302	0	0.0717024	0	0.000787555	0.0766199	0	0.051448	0	0.0134677	0	0	0.487547	0	0.00739079	0.132646	0	0	0.00514229	0.21	0.102416	1.05079
GSM405310	Pattern A	0.0818307	0	0.0077705	0	0.0574798	0	0	0.0288594	0	0	0	0.0815946	0.0499129	0	0.00854756	0.475891	0.0349414	0	0	0.1547	0	0.0184719	0.17	0.123296	1.0609
GSM405313	Pattern A	0	0.00793796	0.00689073	0.00777637	0	0.0612222	0	0.031623	0.00837233	0	0	0.0444007	0.0386291	0	0.00479315	0.0969144	0.0961985	0	0	0.57077	0.0130482	0.0114236	0	0.722169	0.697604
GSM405314	Pattern A	0.0199768	0	0	0.0708998	0	0.164508	0	0.0306787	0	0	0.0410433	0.0434456	0.0453579	0	0.0073188	0.52003	0	0	0.0369563	0	0	0.019785	0.07	0.179808	1.02997
GSM405317	Pattern A	0.0519364	0	0	0.00130331	0	0.0776917	0	0	0	0	0.016537	0.0126725	0.179007	0	0	0.482356	0.00227264	0.00276826	0.126639	0.0121876	0.0226924	0.0119369	0	0.354747	0.943727
GSM405318	Pattern A	0	0.0184769	0.0257026	0.120584	0.077465	0	0	0	0.0526815	0	0	0.123567	0.00865615	0	0.00184042	0.440202	0.130823	0	0	0	0	0	0.58	0.0222833	1.1019
GSM405319	Pattern A	0	0.149453	0.00474101	0.0436467	0.0953391	0	0	0.108456	0	0	0	0.067903	0.000907734	0	0.00136344	0.392855	0.135335	0	0	0	0	0	0.52	0.0316538	1.08206
GSM405321	Pattern A	0	0	0.00900517	0.0321128	8.22717e-05	0.040033	0	0	0	0	0	0.0323158	0.126359	0	0	0.440267	0.0907622	0	0.0950713	0.00298331	0.09805	0.0329582	0	0.326756	0.957368
GSM405322	Pattern A	0	0.008976	0.00332778	0.036449	0	0.0835173	0	0	0.0195661	0	0.0171783	0	0.0318122	0.161818	0	0.428051	0.0310808	0	0.0689988	0.0652115	1.2106e-05	0.0440017	0.01	0.288914	0.98318
GSM405324	Pattern A	0.0444899	0	0	0.0508154	0	0.104018	0	0.0642148	0	0.0321757	0	0.0688526	0.109178	0	0.143021	0.229533	0.0442179	0	0.0880869	0	0	0.0213963	0.06	0.193373	1.01214
GSM405325	Pattern A	0	0.01664	0.012282	0.0153491	0.0113876	0.0315426	0	0	0.0465245	0	0	0.0811486	0.0170104	0	0.0162031	0.455187	0.271895	0	0	0.0248298	0	0	0.05	0.222617	1.01372
GSM405327	Pattern A	0	0.0475837	0.0560804	0.0116315	0.0750995	0.0699173	0	0.081116	0	0	0	0.16616	0.0031884	0	0	0.463626	0	0	0.025597	0	0	0	0.7	0.00434286	1.11093
GSM405331	Pattern A	0	0.0327215	0.0164404	0.0492315	0	0.0735787	0	0.0223953	0.0323506	0	0	0.159513	0.0647966	0	0	0.172933	0.0529174	0	0	0.277386	0.00607613	0.0396604	0	0.411992	0.917796
GSM405333	Pattern A	0.007934	0.0228565	0.053234	0.0918655	0	0.109621	0	0	0.0781755	0	0	0.0981204	0.0377468	0	0.010272	0.486021	0.00415266	0	0	0	0	0	0.43	0.0437394	1.0904
GSM405338	Pattern A	0.0795915	0	0	0.135875	0.0675865	0.00196946	0	0	0.0248185	0	0.0103975	0.143737	0.0626474	0	0.0201413	0.22194	0	0	0	0.23086	0	0.000435712	0.18	0.114893	1.07189
GSM405341	Pattern A	0.0068021	0.0280268	0	0.0273109	0	0.0944731	0	0.0243502	0.0330369	0	0.070175	0	0.153773	0	0.00857056	0.229668	0.0298466	0	0	0.284022	0	0.00994455	0.42	0.0463527	1.08174
GSM405342	Pattern A	0.0344383	0	0	0.0544311	0	0.0469532	0	0.0386867	0.00660868	0	0	0.103937	0.186648	0	0.011896	0.226864	0.0274507	0	0	0.262087	0	0	0.17	0.118068	1.06359
GSM405344	Pattern A	0	0.0396132	0.0109418	0	0	0.254496	0	0.003657	0.0683258	0	0.0405657	0.04774	0.0466822	0	0	0.40746	0.0204767	0.0291024	0.030939	0	0	0	0.22	0.094286	1.05732
GSM405353	Pattern A	0.0151046	0	0.0108523	0.0622666	0	0.113236	0	0.0256873	0	0	0.0434205	0.014331	0.118822	0	0.0248921	0.480872	0.0114627	0.00151032	0	0.06384	0	0.0137028	0.16	0.1268	1.05203
GSM405356	Pattern A	0.0203761	0	0	0.0206724	0	0.124373	0	0.00946294	0	0	0.00531852	0.0597409	0.117431	0	0	0.505936	0.00293917	0.00100538	0.00623012	0.0905041	0	0.0360104	0.06	0.204517	1.02372
GSM405361	Pattern A	0.0446802	0	0	0.117015	0	0.104846	0	0	0	0	0	0.0426665	0.106486	0	0	0.541214	0	0.00266596	0.0273625	0	0	0.0130645	0.09	0.162266	1.0423
GSM405362	Pattern A	0.078477	0	0	0.00727934	0	0.212808	0	0	0.125565	0	0.0223167	0.128394	0.0638311	0.0956707	0.00718908	0.239232	0	0	0	0.0144011	0.00483608	0	0.34	0.0534288	1.08582
GSM405369	Pattern A	0	0.161855	0.0451127	0	0	0.150351	0	0.0831887	0	0	0	0.076451	0.0224727	0	0.000258369	0.353331	0.0762595	0	0.0307205	0	0	0	0.79	-0.00965655	1.08965
GSM405370	Pattern A	0	0.061621	0.0112943	0.203659	0	0.042117	0	0	0.116438	0	0.0236342	0.0317471	0.0735422	0	0.0403083	0.381115	0	0	0	0.014524	0	0	0.98	-0.0406513	1.11694
GSM405371	Pattern A	0.0734936	0	0.143223	0.0648021	0	0.0322686	0	0.00193356	0	0	0.00966728	0.0116764	0.109762	0	0.011585	0.368184	0.142004	0	0	0.00963872	0	0.0217621	0.09	0.164425	1.02613
GSM405373	Pattern A	0.0810606	0	0.00175252	0.0465264	0	0.0494593	0	0	0	0	0	0.035781	0.196307	0	0.00551876	0.324581	0.107948	0	0	0.121455	0	0.0296105	0.05	0.224398	1.00357
GSM405374	Pattern A	0.00730332	0.00290883	0	0.0462891	0	0.0497944	0	0.0184651	0.0337148	0	0.12496	0	0.0538948	0.102995	0	0.303879	0.015913	0	0	0.152448	0.0346522	0.0527822	0.08	0.173485	1.02928
GSM405375	Pattern A	0	0.0485862	0.00728832	0	0	0.271584	0	0.000649723	0.0297712	0	0.132435	0	0.160416	0	0	0.196702	0.00589448	0.00507376	0	0.124851	0.00174012	0.0150078	0.62	0.0168135	1.08456
GSM405376	Pattern A	0.00574088	0	0.0317812	0.133416	0	0	0	0.05893	0	0	0	0.0433876	0	0.199428	0.0119962	0.404628	0	0	0	0.110692	0	0	0.04	0.254516	1.00331
GSM405377	Pattern A	0.0187551	0.0265454	0	0.0589052	0	0.207268	0	0.0141895	0.0556995	0	0.118926	0	0.0990492	0	0.00208821	0.26483	6.97253e-05	0.0105148	0	0.0262076	0	0.0969516	0.8	-0.0125966	1.10502
GSM405378	Pattern A	0.0369167	0	0.0341609	0.209087	0	0.0155164	0	0.0324627	0	0	0	0.0615648	0.281483	0	0	0.228139	0	0	0.0786241	0.0201747	0	0.0018699	0.99	-0.058623	1.11689
GSM405379	Pattern A	0.0329019	0	0	0.0338303	0	0.0946946	0	0.00938209	0	0	0.0351235	0.0219173	0.107383	0	0.0428805	0.501701	0.0678467	0	0.0454864	0	0	0.00685276	0.13	0.142893	1.04652
GSM405380	Pattern A	0	0	0.0655266	0.0200194	0	0.0839765	0	0.0156779	0.0337903	0	0.0469682	0.00747573	0.0168593	0	0	0.449511	0.203032	0	0	0.0571631	0	0	0.21	0.097665	1.0612
GSM405381	Pattern A	0.018127	0.00239657	0	0	0	0.138886	0	0.0108455	0.00109068	0	0.0208978	0.0549445	0.182604	0	0	0.344207	0	0.0113498	0.124353	0.0865078	0	0.00378945	0.07	0.186136	1.01452
GSM405386	Pattern A	0.0972057	0	0	0	0.0862453	0.00111097	0	0.0425554	0	0	0	0.0987608	0.112571	0	0	0.476866	0.0424075	0	0.0422773	0	0	0	0.8	-0.0106526	1.11241
GSM405390	Pattern A	0	0.0315486	0	0.0185893	0	0.0756925	0	0.00703357	0.0739106	0	0.0625426	0	0.00164181	0.294326	0.0100776	0.37234	0	0	0	0.041754	0	0.010544	0	0.390644	0.934116
GSM405391	Pattern A	0.053372	0	0.0317767	0	0	0.0679776	0	0	0	0	0.0999283	0	0.121304	0	0.0107439	0.403708	0.0747799	0	0.0349958	0.061591	0	0.0398217	0.57	0.0250447	1.08738
GSM405395	Pattern A	0	0.083521	0.0175123	0	0.0230568	0.0945304	0	0.0929501	0	0	0	0.207002	0.108169	0	0	0.275858	0	0	0	0.0974009	0	0	0.33	0.0550159	1.09481
GSM405397	Pattern A	0	0.0539511	0.0111676	0.0255717	0	0.204309	0	0.0181612	0.00184004	0	0.0794355	0.0437393	0.0389797	0	0.00605819	0.297765	0	0	0	0.206287	0.00761762	0.0051172	0.16	0.123849	1.04788
GSM405402	Pattern A	0.0219504	0	0	0.0459889	0	0.091559	0	0.0109424	0	0	0.024547	0.0156144	0.180021	0	0	0.277282	0.0153938	0	0	0.285675	0	0.0310261	0.06	0.198435	1.02253
GSM405405	Pattern A	0.0517852	0	0	0.0365387	0	0.157874	0	0.014929	0.0461101	0	0.0664709	0.0111101	0.0197277	0.264131	0.0109175	0.266014	0	0	0	0.048057	0	0.00633523	0.06	0.213953	1.01703
GSM405408	Pattern A	0	0.0477488	0	0.0461049	0	0.0992446	0	0	0.0100656	0	0	0.0526855	0.200277	0	0.00365595	0.403888	0.0142982	0	0.0952251	0.0268055	0	0	0.21	0.0971916	1.05755
GSM405409	Pattern A	0	0.0454936	0.0157487	0.0435674	0	0.0409792	0	0.001171	0.0220852	0	0	0.0519122	0.0182014	0	0.00566347	0.24848	0.119102	0	0	0.376467	0	0.0111281	0	0.317177	0.969654
GSM405411	Pattern A	0.0112262	0	0	0.116154	0	0.141522	0	0.0145015	0	0	0.0331217	0.0475019	0.0702092	0	0.0439404	0.280895	0.0124087	0.0147353	0.125461	0	0.0161919	0.0721313	0.24	0.0888025	1.04871
GSM405412	Pattern A	0.0790174	0	0.0503478	0.0544132	0	0.0576001	0.00532851	0.0152402	0	0	0.0012176	0	0.116187	0	0.0440674	0.482472	0.0617577	0	0	0.0277189	0	0.00463197	0.05	0.244024	0.997055
GSM405415	Pattern A	0	0.0313557	0.0146878	0	0	0.00472921	0	0.033209	0.0415264	0	0	0.026618	0.00908386	0.285497	0	0.291595	0	0	0	0.261698	0	0	0.04	0.259569	1.01903
GSM405416	Pattern A	0	0.0142608	0.000314355	0.0851205	0	0.103674	0	0.0388794	0	0	0.0908774	0	0.0225586	0.061099	0	0.516752	0	0.000782343	0.0367418	0	0	0.0289398	0.19	0.112331	1.06559
GSM405418	Pattern A	0	0.0368862	0.0274304	0	0	0.220573	0	0	0.0390591	0	0.0554518	0.0358155	0.0358937	0.0859426	0	0.462948	0	0	0	0	0	0	0.59	0.0209439	1.10257
GSM405419	Pattern A	0	0.00638583	0.00776328	0.0398915	0	0.108757	0	0.000324648	0	0	0.0430013	0.0513457	0.122229	0	0.00408836	0.548134	0.00954635	0.00165141	0.056882	0	0	0	0.09	0.16321	1.04346
GSM405420	Pattern A	0.128899	0	0	0.111217	0	0.0959332	0	0.0984781	0.0228084	0	0	0.105318	0.022303	0	0	0.364437	0.0120075	0	0	0.0385994	0	0	0.99	-0.0515275	1.12798
GSM405422	Pattern A	0.0643033	0	0	0.0319232	0	0.259023	0	0.00522447	0.064974	0	0.0581226	0.0606014	0.0440777	0.0702384	0	0.19984	0	0.0220264	0.119286	0	0	0.000358452	0.39	0.0496827	1.06839
GSM405423	Pattern A	0.0195891	0	0	0.0937218	0	0	0	0.0365235	0	0	0	0.0391366	0.22145	0	0	0.421549	0	0	0.0914447	0.02055	0.0560345	0	0.04	0.257529	0.989714
GSM405424	Pattern A	0	0.149621	0.0455717	0.0470269	0.0178826	0.00343477	0	0.0184525	0.0225234	0	0	0.168272	0.289862	0	0	0.109271	0	0	0	0.128082	0	0	0.21	0.100791	1.0698
GSM405425	Pattern A	0.0376535	0	0	0.00122855	0	0.0851689	0	0.0217852	0	0	0	0.0680642	0.180054	0	0.00754047	0.330812	0	0	0.267693	0	0	0	0.19	0.11209	1.03858
GSM405427	Pattern A	0.0480567	0	0.000525839	0.0656473	0	0.0919198	0	0.0389211	0	0	0	0.123198	0.0599444	0	0.0202923	0.350062	0.0332879	0	0.133536	0	0.00863051	0.0259779	0.43	0.0439941	1.07068
GSM405428	Pattern A	0	0.0811165	0.0201528	0.0315512	0	0.0777559	0	0.0126976	6.11993e-05	0	0.146365	0	0.0699216	0	0.00578403	0.296596	0	0.0141954	0	0.180068	0.0637348	0	0.67	0.00589241	1.08873
GSM405429	Pattern A	0	0.0471138	0	0.00544315	0	0.061864	0	0	0.00505434	0	0	0.0391	0.161884	0	0.0100021	0.206063	0.0605787	0	0	0.402897	0	0	0.02	0.268122	1.00055
GSM405430	Pattern A	0.0238364	0	0.00241247	0.0339267	0	0.0466426	0	0.00751175	0	0	0	0.0398797	0.183286	0	0.00216195	0.522733	0	0	0	0.10001	0.0201024	0.0174969	0	0.333257	0.962815
GSM405432	Pattern A	0	0.0725088	0.029276	0	0.0134954	0.0267749	0	0.0131885	0	0	0.0705861	0	0.106325	0.0685837	0	0.383517	0	0.0127555	0	0.142399	0	0.0605902	0.32	0.0560878	1.08428
GSM405433	Pattern A	0	0.0185597	0.00785652	0.00441156	0	0.119309	0	0.0348649	0.00293167	0	0.00339813	0.0460896	0.108532	0	0	0.0273177	0.0513465	0	0	0.560585	0.00530017	0.0094981	0	0.401409	0.94163
GSM405437	Pattern A	0	0	0.0296047	0.124729	0	0.00994499	0	0	0.106127	0	0	0.15188	0.0482783	0	0	0.353082	0.0582683	0	0	0.118086	0	0	0.21	0.0998278	1.07188
GSM405439	Pattern A	0	0.0986148	0.00919129	0.0782262	0	0.041371	0	0.0276541	0	0	0.0268026	0.0551955	0.0961891	0	0.00751472	0.385162	0.0375866	0	0	0.122483	0	0.0140088	0.07	0.185264	1.0179
GSM405440	Pattern A	0.0128808	0.000614968	0	0.0757142	0	0.161784	0	0.0363429	0.0273415	0	0.11016	0	0.0759053	0.049478	0.00880236	0.360717	0	0.00841375	0	0.0519275	0.00364823	0.0162694	0.17	0.121503	1.04818
GSM405441	Pattern A	0	0.177624	0.0932307	0.102597	0.0422655	0.0817365	0	0	0.0930099	0	0	0.199901	0.0717709	0	0	0.125792	0.0120731	0	0	0	0	0	0.54	0.0279587	1.11309
GSM405442	Pattern A	0.00213918	0	0.00191497	0.011377	0	0.0760049	0	0	0	0	0.0313442	0	0.206307	0	0.0279643	0.510931	0	0	0.103074	0	0	0.0289433	0.08	0.16846	1.04433
GSM405443	Pattern A	0	0.0500002	0.0178826	0.0314654	0	0.146989	0	0.0446257	0.0159386	0	0.0848642	0.0789904	0.114367	0	0	0.0843313	0.0253886	0.0040006	0	0.28259	0.0133863	0.00518037	0.7	0.00443407	1.1146
GSM405444	Pattern A	0	0.032942	0.0126769	0.0263013	0.000790943	0.0650889	0	0	0.0238497	0	0.0401774	0.0429899	0.102004	0	0.0036327	0.137579	0.0550596	0	0	0.456908	0	0	0.08	0.171633	1.05808
GSM405445	Pattern A	0.00434216	0	0.00246979	0.021882	0	0.0075334	0	0.00209041	0.0126665	0	0.00980374	0.0100749	0	0.349716	0.00594956	0.451887	0	0	0	0.107388	0	0.0141971	0	0.563787	0.831074
GSM405446	Pattern A	0.0195781	0.0478425	0	0.0478608	0	0.0442937	0	0.00776465	0.067844	0	0.0848517	0	0.185023	0	0	0.413776	0	0.00988553	0.00375503	0.0531758	0	0.014349	0.58	0.02166	1.09283
GSM405447	Pattern A	0.0612002	0	0	0	0	0.206144	0	0.0112864	0.0555344	0	0.133953	0	0.0386197	0	0.00724557	0.405313	0.0127665	0	0.000568518	0.000722618	0	0.0666462	0.22	0.093872	1.06143
GSM405449	Pattern A	0.0497853	0	0.00306455	0	0	0.2413	0	0.00633754	0.0980759	0	0.163857	0	0.0959798	0	0.0107837	0.324434	0.00638231	0	0	0	0	0	0.72	0.00331907	1.1014
GSM405450	Pattern A	0.0529735	0	3.33396e-05	0.0247517	0	0.0520221	0	0.0176751	0.0104858	0	0	0.0487285	0.156415	0	0.0106673	0.423185	0.0169358	0	0	0.186127	0	0	0	0.361694	0.941452
GSM405452	Pattern A	0.0229948	0	0	0.0239252	0	0.0908575	0	0.0184157	0	0	0.000501838	0.0350543	0.163955	0	0.0488989	0.384709	0	0	0.0856123	0.084831	0	0.0402443	0.29	0.0672558	1.07164
GSM405453	Pattern A	0.0195087	0	0	0	0	0.0834195	0	0.0457532	0.000203456	0	0	0.0371823	0	0.0359162	0.103692	0.482319	0	0	0.123406	0	0.00148664	0.0671128	0.2	0.111437	1.06148
GSM405454	Pattern A	0.0759723	0	0.00425039	0.0268704	0	0.12231	0	0.0233292	0.0433012	0	0	0	0.0239383	0	0.0269239	0.404607	0.0233981	0	0	0.199712	0	0.0253871	0.15	0.136286	1.04181
GSM405455	Pattern A	0	0.0591653	0.00421233	0.0537011	0	0.107343	0	0.0169716	0.0452618	0	0.0825801	0	0.0233636	0	0.100144	0.463029	0	0	0.0437104	0	0	0.00051804	0.06	0.206527	1.01131
GSM405458	Pattern A	0.0852466	0	0	0.136965	0.0395406	0	0.0236907	0.177001	0	0	0	0.131877	0.130227	0	0.0253778	0.206881	0.0407619	0	0.00243103	0	0	0	0.47	0.0385252	1.08843
GSM405461	Pattern A	0.036455	0	0	0.0328744	0	0.084323	0	0.0101287	0.0332784	0	0	0.0996518	0.0247717	0	0.0600639	0.181289	0.0486069	0	0	0.388557	0	0	0.29	0.0666878	1.11044
GSM405466	Pattern A	0	8.49064e-05	0.00543607	0.0269477	0	0.0171584	0	0.0419006	0.00157039	0	0	0.0277747	0.204995	0.0926788	0.0555025	0.289731	0	0	0.0374642	0.0506494	0	0.148106	0.04	0.259837	1.00212
GSM405469	Pattern A	0	0.156875	0.053475	0	0	0.0468991	0	0.133137	0	0	0	0.115276	0.0454066	0	0	0.378865	0.0700662	0	0	0	0	0	0.98	-0.0411291	1.1112
GSM405470	Pattern A	0.0464009	0	0	0.0662254	0	0.0685397	0	0	0.00446892	0	0.0173122	0.0257755	0.179212	0	0.00426149	0.493801	0.0127075	0	0.0290091	0.0505024	0.00178295	0	0.02	0.269095	0.988828
GSM405472	Pattern A	0.0333051	0	0.0337144	0.116564	0	0.0493793	0	0	0	0	0	0.00678743	0.102412	0	0.00546716	0.531629	0.0139325	0	0.0277865	0.025407	0	0.0536156	0	0.334828	0.955611
GSM405473	Pattern A	0.045973	0	0	0.0473837	0	0.0525118	0	0.0571373	0.03837	0	0.0103656	0.0132601	0.0732061	0	0.020411	0.540291	0	0	0.0943239	0	0	0.00676664	0.06	0.202688	1.01632
GSM405474	Pattern A	0.0237415	0	0	0.054492	0	0.0827563	0	0	0.032842	0	0.0201747	0.0199192	0.112494	0	0.0300896	0.484535	0	0	0.138955	0	0	0	0.29	0.0653075	1.07152
GSM405478	Pattern A	0.0400649	0	0	0	0	0.368042	0	0	0.0202339	0	0.0894233	0.0147128	0.0384805	0	0.00109694	0.382119	0	0.00113959	0	0.0366187	0.00806819	0	0.07	0.189176	1.02188
GSM405479	Pattern A	0.0692392	0	0	0.0412869	0	0.0290077	0	0	0	0	0.0318272	0	0.133101	0	0.00915008	0.605796	0	0	0.0598095	0	0	0.0207821	0	0.359018	0.949424
GSM405481	Pattern A	0.101672	0	0.0536045	0.0791658	0	0.0670596	0	0.00537768	0	0	0	0.0241967	0.101321	0	0.00107498	0.450131	0.0231875	0	0.0754417	0.00646088	0	0.0113066	0.04	0.260215	0.98274
TCGA.02.0047.01A	Pattern A	0.0254551	0	0	0.0359837	0	0	0	0.0188655	0.0634504	0	0.0756764	0	0.00354656	0.293625	0.000300593	0.443901	0	0	0.0188178	0	0	0.0203773	0	0.554932	0.83184
TCGA.02.0055.01A	Pattern A	0	0.000716796	0.0131951	0.0388562	0	0.143165	0.0130391	0	0	0	0.0297157	0.00461381	0.114289	0.0567312	0.00286391	0.334313	0	0.032528	0	0.1036	0	0.112374	0.07	0.189814	1.02184
TCGA.06.0168.01A	Pattern A	0.0308728	0.00374622	0	0.0481927	0	0.0324182	0	0.0311885	0.074118	0	0.0509911	0	0.0225934	0.150529	0.00624412	0.439968	0	0.00853921	0	0.0762212	0	0.0243784	0.22	0.0924359	1.07749
TCGA.06.0171.02A	Pattern A	0.0736595	0	0	0.0779604	0	0.0098616	0	0.0140837	0	0	0	0.0341723	0.00250632	0	0.00471739	0.566377	0.0113456	0.00245529	0	0.0262429	0	0.176618	0.02	0.267078	1.00452
TCGA.06.0187.01A	Pattern A	0.0140049	0	0	0.0534451	0	0.0327954	0	0	0.0960707	0	0.127073	0	0.0712453	0.0428775	0.00078396	0.33163	0	0.0149616	0	0.177602	0	0.0375109	0.34	0.0538851	1.08039
TCGA.06.0644.01A	Pattern A	0	0.0115699	0.00397501	0.0668666	0	0.104874	0.0121095	8.39929e-05	0.0259252	0	0	0.00890713	0.0388482	0.25692	0.0208334	0.353234	0.0521312	0	0.0256175	0	0	0.0181044	0.06	0.212373	1.02681
TCGA.06.0645.01A	Pattern A	0.108872	0	0	0	0	0.0530869	0	0.0255999	0.0450457	0	0.0890509	0	0.0951954	0.0549754	0.0101943	0.308437	0	0	0	0.149784	0.0225822	0.0371763	0.29	0.0650225	1.06707
TCGA.06.0646.01A	Pattern A	0.00587578	0	0	0	0	0.110306	0	0.0268022	0.0151976	0	0.0472071	0.0186932	0.00953971	0.136445	0.0016734	0.259796	0	0	0	0.291594	0.03977	0.0371004	0.14	0.142287	1.05778
TCGA.06.0878.01A	Pattern A	0	0.0420089	0	0	0.00699513	0	0	0.0208688	0.0327196	0.0300311	0.0740929	0	0	0.365875	0.0130088	0.295533	0	0	0	0.102672	0	0.0161948	0.14	0.139186	1.08557
TCGA.06.0882.01A	Pattern A	0	0.015468	0.00416462	0.0477928	0	0.0654969	0	0.00660623	0.0207101	0	0.0623523	0.00201319	0.147272	0	0.00623879	0.519023	0.00442123	0	0	0.049642	0.0233179	0.0254806	0.2	0.106982	1.07059
TCGA.06.2561.01A	Pattern A	0	0.0362719	0.00388868	0.0224889	0	0.0397931	0.0421683	0.00405943	0.027515	0	0.0290232	0	0.032421	0	0.00586001	0.624325	0.0180225	0	0.0590536	0	0	0.0551098	0.22	0.0928131	1.08542
TCGA.06.2562.01A	Pattern A	0.0253903	0	0	0.00179328	0	0.0206859	0	0.00411753	0.0547418	0	0.133409	0	0	0.289243	0	0.304212	0	0.0134991	0	0.124126	0	0.0287825	0.17	0.122666	1.08047
TCGA.06.5411.01A	Pattern A	0.0604381	0	0.0217818	0.0882231	0	0	0	0.0102362	0	0	0	0.0134472	0.152874	0	0.0140018	0.391839	0.0649036	0	0.0594215	0.0350106	0	0.0878241	0.06	0.194951	1.01851
TCGA.06.5418.01A	Pattern A	0	0.0714291	0.0101004	0	0	0.0669153	0	0.0669559	0.040776	0.0277616	0	0.0440574	0.0530913	0.0437414	0	0.365585	0	0.0132728	0	0.090642	0	0.105672	0.31	0.0580674	1.07635
TCGA.12.0616.01A	Pattern A	0.0717121	0	0.037139	0.226087	0	0	0	0.0381274	0	0	0	0.0379471	0.00532145	0	0.0476135	0.423197	0.0214616	0	0.0615532	0	0	0.0298405	0.07	0.184988	1.01475
TCGA.14.0789.01A	Pattern A	0.0278066	0	0	0.00676343	0	0.0870428	0	0.00815128	0.0709221	0	0.144076	0	0.0269983	0.218776	0.000240154	0.262807	0	0.0072492	0	0.111686	0.00303874	0.0244429	0.22	0.0930828	1.07281
TCGA.14.2554.01A	Pattern A	0.0127844	0	0	0.0823467	0	0.107697	0	0.0307409	0.0758326	0	0.0946935	0	0.0939204	0	0.000157143	0.275446	0	0.00547892	0	0.169528	0.0375562	0.0138187	0.57	0.0235774	1.08378
TCGA.15.1444.01A	Pattern A	0.0105684	0	0.00518538	0	0	0.061963	0	0.012673	0	0	0	0.0186987	0.178625	0	0.00797629	0.344843	0.0169105	0	0	0.300943	0	0.0416139	0	0.308345	0.976356
TCGA.16.0846.01A	Pattern A	0.03781	0	0.00057409	0.110779	0	0.0201311	0	0.0469602	0	0	0	0.0349352	0.148774	0	0.121193	0.3762	0.00989518	0	0	0.0927479	0	0	0.05	0.245583	0.997072
TCGA.16.1045.01B	Pattern A	0.0478393	0	0	0.0284724	0	0.072896	0	0	0.0346717	0	0.0680598	0	0	0.0479701	0.00119581	0.594766	0	0	0.0524921	0	0	0.0516366	0.24	0.0880142	1.08614
TCGA.19.0957.02A	Pattern A	0.00515491	0.0103597	0.0162048	0.105326	0	0.115528	0	0.00142115	0.0350784	0	0.0801159	0.0290024	0.0944469	0	0	0.483273	0.0071335	0.0020008	0	0.00959443	0.000667012	0.00469356	0.3	0.0616185	1.08413
TCGA.19.1389.02A	Pattern A	0.0122579	0	0	0.0743807	0.00488509	0	0.0511941	0.036126	0	0	0	0	0.0317427	0.0261142	0.00165325	0.569747	0.0124277	0	0	0.137757	0	0.0417153	0.38	0.0509628	1.10822
TCGA.19.2620.01A	Pattern A	0	0.00600948	0.000995994	0.0722714	0	0.0446259	0	0.0130115	0.0186305	0	0	0.124022	0.0971245	0	0	0.368833	0.0107767	0.00759107	0	0.212336	0	0.0237718	0.56	0.0262777	1.1137
TCGA.26.5136.01B	Pattern A	0.0687945	0	0.0250519	0.035309	0	0.0892039	0	0.0249841	0.00503288	0	0	0.0465746	0.131918	0	0.0247597	0.428966	0.00827005	0	0.106975	0	0	0.00416122	0.22	0.095249	1.05194
TCGA.27.1832.01A	Pattern A	0.0388995	0	0.0105534	0.0985862	0	0	0	0	0.0668907	0.0406866	0	0.0299851	0.195178	0	0.0290987	0.354634	0.0322702	0	0.0326308	0.0563963	0	0.0141903	0.54	0.0285362	1.08477
TCGA.27.1834.01A	Pattern A	0.0114364	0	0.000426113	0.0837225	0	0.0450916	0	0.0172252	0	0	0	0.0441692	0.164531	0	0.0680698	0.449801	0	0.00291366	0.105443	0	0.00556654	0.00160373	0.05	0.222409	1.00526
TCGA.27.1837.01A	Pattern A	0.0349379	0	0	0	0	0.0434115	0	0.028268	0	0	0	0.042033	0.105995	0	0.0992279	0.458505	0	0.00123676	0.173767	0	0	0.0126186	0.18	0.116541	1.0536
TCGA.27.2519.01A	Pattern A	0.0428839	0	0.0213456	0.0500588	0	0.101479	0	0	0.0224737	0	0.0161819	0	0.148424	0.0628519	0.0191659	0.48123	0	0	0	0.0104674	0	0.0234377	0.12	0.154216	1.04689
TCGA.28.5216.01A	Pattern A	0	0.0259759	0.00687822	0.0472486	0	0.113028	0	0.00233019	0.0251816	0	0.133329	0	0.0218398	0.0521033	0	0.332517	0.0118815	0	0	0.189956	0.00576763	0.0319627	0.24	0.0842755	1.06789
TCGA.28.5220.01A	Pattern A	0	0.0332721	0.011556	0.0207803	0	0.0800607	0	0	0	0	0.00818638	0.0480436	0.151096	0	0.0421946	0.380531	0.00996966	0	0.189928	0	0	0.0243806	0.02	0.276295	0.972683
TCGA.32.2615.01A	Pattern A	0	0.0488148	0.0150916	0.00084974	0	0.0925223	0	0.0207589	0.0449962	0	0.0298658	0.0367472	0.0867211	0	0.00386048	0.405254	0.00910521	0.00626413	0	0.149349	0.00921279	0.0405869	0.5	0.0337718	1.08652
TCGA.32.5222.01A	Pattern A	0.0145853	0	0	0.0274285	0	0.120533	0	0.0145417	0	0	0	0.0309365	0.103139	0	0.0306195	0.42355	0.0272832	0.0111111	0.0539497	0.0255233	0.0408674	0.0759314	0.05	0.238663	0.996685
TCGA.41.2571.01A	Pattern A	0.0651591	0	0.00626496	0	0	0.118325	0	0.00238344	0.0234397	0	0.0647385	0.051882	0.0137104	0.209244	0.00746201	0.190422	0	0	0	0.22733	0	0.019639	0.06	0.213545	1.01981
TCGA.41.2572.01A	Pattern A	0	0.0443884	0.0209521	0	0	0.0875316	0	0.0108818	0.0235835	0.0606566	0	0.0720604	0	0	0.0291878	0.531999	0	0.0188875	0.0789474	0	0	0.0209239	0.33	0.0558602	1.08267
TCGA.41.4097.01A	Pattern A	0	0.0238032	0.00249781	0.107227	0	0	0.00402461	0	0.0655356	0	0.0107671	0	0.000225469	0.0423885	0.0054872	0.62918	0.00589917	0	0.0320234	0.0279719	0	0.0429696	0.22	0.0934396	1.09174
TCGA.76.4926.01B	Pattern A	0	0.0139267	0.0115187	0	0	0.178104	0	0	0.116951	0	0.11822	0	0.036322	0	0.0100687	0.452732	0.00214364	0.00446362	0.0237332	0.0179074	0	0.0139086	0.21	0.0962166	1.06076
TCGA.76.4928.01B	Pattern A	0.103532	0	0	0.039794	0.063179	0	0.252391	0	0	0	0.0249695	0.0110567	0.00417579	0.0510172	0	0.320651	0	0.00188133	0.0805028	0	0	0.0468502	0.43	0.0447685	1.0605
TCGA.76.4929.01A	Pattern A	0	0.0466865	0	0.0526187	0	0	0	0.0158684	0.041519	0	0	0.0284198	0	0.249473	0.00386884	0.437709	0	0	0.107854	0	0	0.0159822	0.14	0.1416	1.06736
TCGA.CS.4941.01A	Pattern A	0.0985199	0	0.00371733	0.0610814	0	0.112055	0	0	0	0	0	0.0295956	0.125466	0	0.0525099	0.394798	0	0.00622797	0.110395	0	0	0.00563327	0.15	0.134402	1.03315
TCGA.CS.4942.01A	Pattern A	0.09281	0	0	0.0138739	0	0.0972914	0	0	0.00295773	0	0	0.0225829	0.259785	0	0.0087219	0.301383	0.00924854	0.0067714	0.176898	0	0.00767657	0	0.02	0.266936	0.977344
TCGA.CS.5390.01A	Pattern A	0	0.00995855	0.0655717	0.0936	0	0.1563	0	0	0.0232516	0	0.0769754	0.0070072	0.0322458	0	0.082695	0.321868	0.0312966	0	0.0992299	0	0	0	0.95	-0.0298974	1.09225
TCGA.CS.5393.01A	Pattern A	0.0357523	0	0	0.00803513	0	0.0605867	0	0	0	0	0	0.0141187	0.283285	0	0	0.40722	0	0.00785667	0.158957	0.0015293	0	0.022659	0.05	0.243923	1.00176
TCGA.CS.5394.01A	Pattern A	0.227448	0	0	0	0	0.216671	0	0	0.0856865	0	0.221728	0	0.0451277	0	0	0.175113	0.0282257	0	0	0	0	0	0.88	-0.0227624	1.12658
TCGA.CS.5396.01A	Pattern A	0.0776208	0	0	0.0145971	0	0.138869	0	0	0.0705841	0	0.0685254	0	0.0333607	0	0	0.581964	0.00690132	0.00757799	0	0	0	0	0.42	0.047762	1.09794
TCGA.CS.5397.01A	Pattern A	0.0158735	0	0	0.130592	0	0.137089	0.0406905	0	0	0	0	0.0723876	0.0529513	0	0	0.420422	0.0405617	0.0100756	0.0544358	0	0	0.0249207	0.43	0.0442376	1.08063
TCGA.CS.6290.01A	Pattern A	0.0368847	0	0	0.03903	0	0.0517946	0	0	0.0286141	0	0.0144171	0.00832892	0.224325	0	0.00768461	0.432356	0	0	0.151574	0	0	0.00499099	0.04	0.26063	0.987415
TCGA.CS.6666.01A	Pattern A	0.107907	0	0.00736077	0.0688751	0	0.0200085	0	0.0109212	0	0	0	0.0532213	0.130119	0	0.0287172	0.438219	0.025617	0	0.0459238	0.0475596	0	0.0155504	0.12	0.152574	1.03564
TCGA.CS.6667.01A	Pattern A	0.0347198	0	0.00802491	0	0	0.138638	0	0	0.0316204	0	0.0225765	0.0343514	0.106373	0	0.00347617	0.523541	0	0	0.068396	0	0	0.0282828	0.2	0.109673	1.06176
TCGA.CS.6670.01A	Pattern A	0.0182999	0	0	0.0156285	0.00548905	0.0924684	0	0	0.0611615	0	0.0465939	0	0.0405908	0	0.00902269	0.0739969	0.0086362	0	0	0.628112	0	0	0.17	0.120259	1.12891
TCGA.DB.5273.01A	Pattern A	0.0369376	0	0	0.0507309	0	0.0844096	0	0	0.0553828	0	0.0495205	0	0.182666	0	0.012958	0.41551	0.00821304	0	0	0.0950288	0	0.0086431	0.05	0.239666	0.996883
TCGA.DB.5275.01A	Pattern A	0.0136644	0	0.0095021	0.0203341	0	0.0264081	0	0.0860586	0.0338002	0	0	0.122061	0.0441425	0	0.00468993	0.141908	0.0627938	0	0	0.396991	0.00799036	0.0296551	0.05	0.224278	1.03111
TCGA.DB.5277.01A	Pattern A	0	0.0093581	0.00106181	0.00778659	0	0.210144	0	0.02063	0.0386551	0	0	0.125949	0.092809	0	0.0154808	0.332636	0.104271	0	0.0412192	0	0	0	0.23	0.0912644	1.05957
TCGA.DB.5278.01A	Pattern A	0.0138905	0	0.000464582	0.0398446	0	0.202524	0	0	0.032562	0	0.0717872	0	0.0980685	0	0.0349191	0.364864	0.0113426	0	0	0.12948	0.000252272	0	0.31	0.0569742	1.07202
TCGA.DB.5279.01A	Pattern A	0.0225074	0	0.00537335	0.140853	0	0	0	0.00507978	0.016618	0	0	0.0139289	0.0465633	0	0.00568663	0.0937056	0.028285	0	0	0.526549	0	0.09485	0.05	0.222408	1.0452
TCGA.DB.5281.01A	Pattern A	0.0398372	0	0.00250726	0.0835763	0	0.132434	0	0	0	0	0.00515977	0.0498503	0.0461359	0	0.0102705	0.494251	0	0	0.0498567	0.0402279	0	0.0458938	0.29	0.065733	1.07756
TCGA.DB.A4X9.01A	Pattern A	0	0.0531059	0.0173399	0	0.0506042	0.106159	0	0	0.080144	0	0.0629801	0.0294217	0.182353	0	0	0.221052	0	0	0	0.188699	0	0.00814092	0.29	0.0650064	1.06504
TCGA.DB.A4XF.01A	Pattern A	0	0.0155905	9.647e-05	0.0199681	0	0.186752	0	0	0.071574	0	0.0849157	0.0118806	0.0405063	0	0.00946814	0.482322	0.032065	0	0.0314566	0	0.0134054	0	0.26	0.0728097	1.07381
TCGA.DB.A4XG.01A	Pattern A	0	0.0771091	0.00437101	0	0.0912845	0	0	0.271814	0	0	0	0.155716	0.0795611	0	0.0104375	0.309707	0	0	0	0	0	0	0.9	-0.0251664	1.12477
TCGA.DB.A64L.01A	Pattern A	0.0422962	0	0.0580142	0.0632842	0	0.0083578	0	0.035125	0	0	0	0.0546149	0.0577472	0	0.0124716	0.224688	0	0	0	0.341276	0	0.102125	0.07	0.189117	1.03296
TCGA.DB.A64P.01A	Pattern A	0.0259512	0	0.0487297	0	0.00874822	0.0703813	0	0.0275692	0	0	0.00466606	0.0475334	0.0877728	0	0.0292372	0.468249	0.079293	0	0	0.101869	0	0	0.18	0.115972	1.057
TCGA.DB.A64S.01A	Pattern A	0.0138779	0	0.00389808	0.00783918	0	0.0361808	0	0.00335331	0.0144887	0	0.012806	0.00695976	0.221244	0	0.00869948	0.278082	0	0	0	0.38396	0.00861051	0	0	0.405578	0.92556
TCGA.DB.A64U.01A	Pattern A	0.0170959	0	0.00130119	0	0.0895046	0	0	0.0623033	0	0	0	0.102778	0.220458	0	0	0.168667	0.0205414	0	0	0.288348	0.0290027	0	0.12	0.155051	1.0487
TCGA.DB.A75L.01A	Pattern A	0	0.00742905	0.0171807	0.00397726	0.00595463	0.107705	0	0	0.0917458	0	0	0.047984	0.030431	0	0	0.549725	0	0.0242066	0.106859	0	0.00526873	0.00153297	0.08	0.176854	1.02867
TCGA.DB.A75M.01A	Pattern A	0	0.04423	0.00406985	0.0515571	0.0783205	0	0	0	0.0619208	0	0	0.0708441	0.177083	0	0.0139243	0.392572	0.0407616	0	0	0.0439144	0.00399732	0.0168053	0.11	0.159145	1.03346
TCGA.DH.5142.01A	Pattern A	0.0179827	0	0.00276837	0.0141478	0	0.0774496	0	0	0	0	0	0.0391979	0.235549	0	0.0177786	0.450323	0	0	0.135134	0	0.00966934	0	0	0.402931	0.918778
TCGA.DH.5143.01A	Pattern A	0	0.0440463	0.0165756	0	0	0.0739469	0	0	0	0	0	0.0335684	0.287296	0	0.00798709	0.213014	0.0663184	0	0	0.257247	0	0	0.01	0.285666	0.980282
TCGA.DH.5144.01A	Pattern A	0	0.000244279	0.00283504	0.0633415	0	0	0	0.0980167	0	0	0	0.121179	0.0616034	0	0.00912542	0.374047	0.141182	0	0	0.128426	0	0	0.23	0.0914699	1.07109
TCGA.DH.A66B.01A	Pattern A	0.0368166	0	0.0145974	0.0314424	0	0.0775606	0	0	0.0234458	0	0	0.0441118	0.184269	0	0.0102004	0.500319	0.00959624	0	0.0164788	0.0377929	0.00959074	0.00377804	0	0.34456	0.951065
TCGA.DH.A66D.01A	Pattern A	0.0553205	0	0	0	0	0.0645937	0	0	0	0	0	0.0319593	0.334747	0	0	0.358109	0.00212006	0	0.0576216	0.095529	0	0	0.06	0.216507	1.01895
TCGA.DH.A66F.01A	Pattern A	0	0.103839	0.071868	0	0.173044	0	0	0	0.0427171	0	0.074174	0	0.024157	0	0.0155768	0.320736	0.0662548	0	0.104112	0	0.00352114	0	0.18	0.117653	1.02788
TCGA.DH.A66G.01A	Pattern A	0.00580232	0	0.010756	0.0224996	0	0.0598724	0	0.0100203	0.000932456	0	0.00440288	0.0118393	0.118484	0	0	0.237625	0.0746133	0	0	0.413206	0.0264868	0.00345985	0.11	0.157756	1.05851
TCGA.DH.A7UR.01A	Pattern A	0.106449	0	0.00375445	0.0433618	0.128528	0	0	0.151454	0	0	0.0236893	0.102609	0	0	0.0366818	0.376885	0.0116558	0	0.0149312	0	0	0	0.8	-0.0129902	1.10923
TCGA.DH.A7US.01A	Pattern A	0	0.111871	0.0321295	0.0138317	0.178589	0	0	0	0.0857912	0	0.072598	0	0.0275997	0	0	0.415361	0.0297516	0	0.0324776	0	0	0	0.21	0.103957	1.04814
TCGA.DH.A7UV.01A	Pattern A	0.0343989	0	0	0	0.0402033	0.00951049	0	0	0	0	0	0.0410555	0.255491	0	0	0.537135	0	0	0.0712682	0.0109379	0	0	0.06	0.20687	1.03464
TCGA.DU.5849.01A	Pattern A	0	0.0788946	0.0344536	0.0889144	0.0370016	0	0	0.00047457	0	0	0	0.0916341	0.0158224	0	0.012486	0.389584	0.150588	0	0	0.100095	0	5.1339e-05	0.25	0.0822692	1.0649
TCGA.DU.5853.01A	Pattern A	0.0331064	0	0.00817305	0.0719538	0	0.071102	0	0	0.0139492	0	0.00554778	0.0112294	0.153357	0	0.0250853	0.304817	0.0642699	0	0	0.230108	0	0.00730093	0.04	0.255519	0.988091
TCGA.DU.5854.01A	Pattern A	0	0.0144211	0.00859666	0.133008	0	0.0884281	0	0	0.0682851	0	0.0505987	0.0156466	0.0277166	0	0.0046599	0.353304	0.0462304	0.00108127	0.139941	0	0.0211046	0.0269783	0.37	0.0512716	1.06191
TCGA.DU.5855.01A	Pattern A	0	0	0.00452767	0.00289803	0	0.0452938	0	0.0232011	0	0	0	0.0195995	0.198202	0	0	0.229837	0.00943974	0.00219643	0	0.464805	0	0	0	0.442999	0.908135
TCGA.DU.5871.01A	Pattern A	0.0152348	0	0	0.0300213	0	0.172996	0	0	0	0	0	0.0703658	0.0481488	0	0.00355305	0.358028	0.0412656	0	0	0.230443	0.0120246	0.0179186	0.05	0.246029	0.998194
TCGA.DU.6399.01A	Pattern A	0.0273634	0	0	0.0151105	0	0.0932874	0	0	0.00148012	0	0	0.0281069	0.200349	0	0.00151702	0.471721	0.0729652	0.000115038	0.0319407	0.056044	0	0	0.06	0.20102	1.02539
TCGA.DU.6401.01A	Pattern A	0.00982824	0	0.00216774	0.00174579	0	0.0674234	0	0.0156909	0.0216958	0	0	0.0331762	0.0477066	0	0.0121907	0.089375	0.10127	0	0	0.583226	0.00649472	0.00800867	0	0.474865	0.89482
TCGA.DU.6408.01A	Pattern A	0	0.0105835	0.00798754	0.0321684	0	0.180617	0	0.00331585	0	0	0	0.112849	0.0368866	0	0.00755312	0.24526	0.0660274	0	0	0.254516	0.0250629	0.0171724	0	0.313673	0.965986
TCGA.DU.7007.01A	Pattern A	0.0861858	0	0.0500411	0.124415	0	0.0336024	0	0.0204021	0.00960494	0	0	0.0280084	0.120837	0	0.0225213	0.342419	0.0942284	0	0	0.0276075	0	0.0401281	0.2	0.105711	1.04578
TCGA.DU.7008.01A	Pattern A	0.0834546	0	0.130678	0.0667491	0	0.0393943	0	0	0	0	0	0.0855519	0.251037	0	0	0.216554	0	0	0.126581	0	0	0	0.32	0.0566212	1.0624
TCGA.DU.7009.01A	Pattern A	0	0.0379491	0.012362	0	0.0391861	0	0	0.116499	0	0	0	0.0480618	0.0778419	0	0	0.138861	0.0149108	0	0	0.514329	0	0	0.26	0.0725346	1.12436
TCGA.DU.7012.01A	Pattern A	0.0641312	0	0.00317515	0.0743326	0	0.0650657	0	0.0263845	0.0255783	0	0	0.0595854	0.0824517	0	0.0679794	0.332479	0.112114	0	0.0816728	0	0	0.00505005	0.06	0.193871	1.00559
TCGA.DU.7015.01A	Pattern A	0.0450187	0	0.0318187	0.0352919	0	0.0709113	0	0	0.0117531	0	0.00950826	0.0106898	0.214839	0	0.0185829	0.366774	0.00546326	0	0.172246	0	0	0.00710372	0	0.322862	0.952633
TCGA.DU.7018.01A	Pattern A	0.0349618	0	0.0482174	0	0.0748423	0	0	0.0431073	0	0	0	0.0926658	0	0	0	0.490407	0.0131624	0	0	0.202636	0	0	0.9	-0.025608	1.13517
TCGA.DU.7019.01A	Pattern A	0.0110064	0	0.00738304	0.0147736	0	0.150807	0	0.0172228	0.00182508	0	0	0.142554	0.0618283	0	0	0.225637	0.0960894	0.00069154	0	0.235074	0.0101699	0.0249374	0	0.31535	0.96633
TCGA.DU.7290.01A	Pattern A	0.0443724	0	0	0.036935	0	0.0710511	0	0.0189887	0	0	0.00715157	0.0279121	0.179249	0	0.0144544	0.331054	0.0579071	0	0	0.126014	0.0849106	0	0.24	0.0895081	1.0603
TCGA.DU.7292.01A	Pattern A	0.0115127	0.00264032	0	0.0642646	0	0.258527	0	0	0.128746	0	0	0.0570003	0.0889679	0.123777	0.0405716	0.0143241	0	0	0.203016	0	0.00665244	0	0.59	0.0207074	1.08108
TCGA.DU.7300.01A	Pattern A	0.0819674	0	0.00402449	0.0867676	0	0	0	0.0352979	0	0	0	0.0462908	0.0571078	0.0536172	0.0408515	0.45445	0.0628124	0	0.0768132	0	0	0	0.16	0.128727	1.04675
TCGA.DU.7301.01A	Pattern A	0.0170996	0	0	0.0075935	0	0.0928413	0	0	0	0	0	0.0315988	0.113832	0	0.0105798	0.532852	0.086041	0	0	0.107562	0	0	0	0.337808	0.959444
TCGA.DU.8158.01A	Pattern A	0.044272	0	0	0.106539	0	0.106099	0	0.00562133	0.0138009	0	0	0	0.0856183	0	0.0293412	0.481994	0.0848831	0	0.0271322	0.00744923	0	0.0072487	0.21	0.0989537	1.06323
TCGA.DU.8161.01A	Pattern A	0.0162426	0	0	0.0570133	0	0.104522	0	0.0111447	0	0	0	0.0173736	0.138758	0	0.0949877	0.433624	0.0216434	0	0.103944	0	0	0.00074596	0.27	0.0700948	1.07234
TCGA.DU.8162.01A	Pattern A	0	0	0	0.0331077	0	0.110905	0	0.00489102	0.00188795	0	0	0.0282687	0.0279689	0	0.000794364	0.0700268	0.116188	0	0	0.605962	0	0	0.12	0.151947	1.10632
TCGA.DU.8163.01A	Pattern A	0.00827239	0	0.00327305	0.019554	0	0.175255	0	0	0.0211087	0	0.00998384	0.031366	0.239395	0	0.000312448	0.330065	0	0	0.0545833	0.103214	0	0.0036158	0.04	0.26316	0.983853
TCGA.DU.A5TT.01A	Pattern A	0	0.0866826	0.0486471	0.0323211	0	0.0933403	0	0.00739621	0.0144694	0	0.055952	0.00648285	0.122874	0	0	0.406975	0	0.0183496	0	0.0895357	0	0.0169741	0.21	0.103145	1.04952
TCGA.DU.A5TW.01A	Pattern A	0	0.120232	0.043469	0	0.0817558	0.0645036	0	0	0.0873249	0	0.0118366	0.0463392	0.0287224	0	0.0128153	0.391837	0.00915855	0	0	0.0410839	0.0280783	0.0328435	0.26	0.073027	1.059
TCGA.DU.A5TY.01A	Pattern A	0.0609541	0	0.0153774	0.0225269	0	0.0228501	0	0.0346275	0	0	0	0.063517	0	0.0590843	0.0293643	0.431488	0.228933	0	0.0116822	0.0175366	0	0.00205944	0.05	0.246317	0.999788
TCGA.DU.A6S2.01A	Pattern A	0.100228	0	0	0.0147375	0.095221	0	0	0.014346	0	0	0	0.0828364	0.0220237	0	0.00726684	0.0128371	0.0559494	0	0	0.588749	0	0.00580514	0.06	0.202574	1.08234
TCGA.DU.A6S6.01A	Pattern A	0	0.160581	0.0425485	0.055224	0.0707977	0	0	0.0941958	0	0	0	0.11738	0.149479	0	0.00960204	0.111406	0	0	0	0.188787	0	0	0.89	-0.0241188	1.10867
TCGA.DU.A6S7.01A	Pattern A	0.0138353	0	0.00128036	0.034256	0	0.0167645	0	0	0.0567065	0	0	0.109622	0.245685	0	0.00157469	0.437568	0.0201943	0.000695161	0	0.0424778	0.00802286	0.0113179	0.05	0.247755	1.00624
TCGA.DU.A6S8.01A	Pattern A	0	0.0267446	0	0.0139828	0	0.13192	0	0.0446542	0	0	0.0444412	0.0883567	0.14429	0	0	0.391441	0.089645	0	0.0119617	0.0125618	0	0	0.72	0.00287116	1.10335
TCGA.DU.A76R.01A	Pattern A	0.0257289	0	0	0	0.173627	0.0788498	0	0	0.12039	0	0.0130935	0.0306833	0.0373527	0.0322564	0.0159806	0.191926	0.0214805	0	0.236643	0	0.0148049	0.00718253	0.16	0.125627	1.02755
TCGA.DU.A7T6.01A	Pattern A	0.0188355	0	0	0.0664571	0	0.0818368	0	0	0.0491707	0	0	0.0867665	0.0121787	0.314139	0.0229753	0.249352	0	0	0	0.0982878	0	0	0.03	0.264665	1.00396
TCGA.DU.A7T8.01A	Pattern A	0.00620854	0	0.00325098	0.00443016	0.00548913	0.0683629	0	0.00856663	0.00712668	0	0	0.0724701	0.164036	0	0.0537989	0.251497	0.0174078	0	0	0.33099	0	0.0063659	0.05	0.242043	1.01186
TCGA.DU.A7TI.01A	Pattern A	0.0193769	0	0.0242756	0	0	0.138881	0	0.0248434	0.0156511	0	0	0.0879404	0.0390744	0	0.00272487	0.0331398	0.0237538	0.00356598	0	0.533085	0.0375138	0.0161744	0	0.459293	0.903691
TCGA.E1.5302.01A	Pattern A	0	0.00883903	0.00394295	0.021151	0	0.11565	0	0	0.0427428	0	0.073455	0	0.158164	0	0	0.528149	0.00877812	0.0194202	0.00465985	0	0.00868583	0.00636275	0.06	0.195567	1.02787
TCGA.E1.5303.01A	Pattern A	0.0251608	0	0	0	0	0.186613	0	0.0143505	0	0	0.0182822	0.0855429	0.286454	0	0	0.283692	0.0105392	0.0110299	0	0.0620453	0.0067041	0.00958642	0.02	0.269141	0.984675
TCGA.E1.5305.01A	Pattern A	0.0111271	0	0.00259023	0.0528945	0	0.104236	0	0	0.0722589	0	0.0590235	0	0.161362	0	0.0132236	0.336499	0.0152804	0	0.0913197	0	0.0372304	0.042954	0.19	0.112162	1.04275
TCGA.E1.5307.01A	Pattern A	0.0153453	0	0	0	0	0.130259	0	0.003007	0.031296	0	0.0368859	0.0508513	0.242448	0	0	0.308054	0.0300395	0.000983094	0.0434918	0.0583743	0.0489642	0	0.08	0.169808	1.02505
TCGA.E1.5319.01A	Pattern A	0.0548515	0	0.0129463	0.0714395	0	0.13823	0	0	0.0326561	0	0.0141349	0.0301689	0.0198694	0	0	0.482052	0.00238959	0.0133115	0.127951	0	0	0	0.16	0.126706	1.04084
TCGA.E1.A7YH.01A	Pattern A	0.0308465	0	0	0	0	0.121687	0	0	0.0457571	0	0.0195937	0.0845553	0.165299	0	0	0.467243	0	0.00459779	0.0604212	0	0	0	0.23	0.0900443	1.06964
TCGA.E1.A7YM.01A	Pattern A	0.0223622	0.00995938	0	0.0305905	0	0.112479	0	0.000477763	0.0863155	0	0.150224	0.0131676	0.0720891	0	0	0.323885	0	0.0124366	0.133483	0	0.00409488	0.0284348	0.51	0.0329602	1.07298
TCGA.E1.A7YN.01A	Pattern A	0.0705468	0	0	0.157321	0.00178564	0	0	0	0.0162513	0	0.000722547	0.0143357	0.112783	0	0.0223684	0.447717	0.00565472	0	0.111816	0	0	0.0386979	0.09	0.167448	1.02528
TCGA.E1.A7YO.01A	Pattern A	0	0.0887132	0.0353263	0	0.087914	0	0	0.11865	0	0	0	0.0793851	0.0206835	0	0.0261093	0.413005	0	0	0	0.127306	0	0.00290856	0.67	0.00813831	1.09438
TCGA.E1.A7YU.01A	Pattern A	0	0.0719958	0.0258629	0.0335862	0.0941699	0	0	0	0.102266	0	0.0856117	0	0.0900494	0	0.0117844	0.248632	0	0	0.219207	0	0.0103558	0.00647938	0.43	0.042941	1.04968
TCGA.E1.A7Z2.01A	Pattern A	0	0.014855	0.0100746	0.0669517	0	0.115087	0	0.0246147	0.0844163	0	0.10889	0.0516733	0.0334151	0.122134	0.0139127	0.0102868	0.0504069	0	0.225989	0	0.04124	0.0260531	0.72	0.00258666	1.08079
TCGA.E1.A7Z4.01A	Pattern A	0	0.0184139	0.0331227	0	0.0140208	0.0751305	0	0.000854619	0.0144299	0	0.000585597	0.070885	0.208194	0	0.00618945	0.414408	0	0	0.0733655	0.0668554	0	0.00354427	0.05	0.229302	1.00265
TCGA.E1.A7Z6.01A	Pattern A	0	0.0640977	0.0368186	0.062288	0	0.0588416	0	0	0.0120709	0	0	0.0757345	0.0595087	0	0.0039524	0.40284	0.0627666	0	0	0.116773	0.00965475	0.0346536	0.22	0.0950131	1.05949
TCGA.F6.A8O3.01A	Pattern A	0	0.087227	0	0.0599673	0.0489131	0	0	0.0716207	0	0	0	0.104708	0.0163307	0	0.00123811	0.351919	0.00692332	0	0	0.249025	0	0.00212771	0.59	0.0200379	1.10859
TCGA.F6.A8O4.01A	Pattern A	0	0.128648	0.0227333	0.0690905	0	0	0	0.000227552	0	0	0	0.0580149	0.107328	0	0	0.251251	0.00568929	0	0	0.354188	0	0.00282885	0.22	0.0955586	1.07926
TCGA.FG.5962.01B	Pattern A	0	0.0891241	0.0219634	0.0148208	0.00641588	0.0455198	0	0.0192443	0	0	0	0.0816974	0.115437	0	0.0293973	0.17162	0.0461913	0	0	0.358568	0	0	0.22	0.0946982	1.07916
TCGA.FG.6688.01A	Pattern A	0	0.024215	0.0106737	0.0387538	0	0.0875234	0	0.00226429	0	0	0.0381244	0.0200818	0.0382929	0	0.00630663	0.470955	0.161579	0	0.0623954	0	0.0272587	0.0115756	0.37	0.0515122	1.08209
TCGA.FG.6689.01A	Pattern A	0.0498658	0	0	0	0	0.128827	0	0	0.0189961	0	0.0140554	0.0454454	0.220652	0	0	0.324514	0.0109242	0.00118888	0	0.185531	0	0	0.07	0.182977	1.02531
TCGA.FG.6690.01A	Pattern A	0.0291669	0	0.000245877	0.0180343	0.0223438	0.0318669	0	0	0	0	0	0.0286858	0.293605	0	0	0.483108	0	0	0.0383158	0.0546275	0	0	0.05	0.225466	1.02314
TCGA.FG.6692.01A	Pattern A	0	0.0665735	0.0257975	0	0	0.0644774	0	0	0.0556128	0.0823684	0	0.087758	0	1.65785e-05	0.0513704	0.343603	0.0180051	0.00258376	0.19049	0	0	0.0113438	0.46	0.0390145	1.06585
TCGA.FG.7636.01A	Pattern A	0	0.0629033	0.00413424	0.0118624	0	0.163022	0	0	0.0657769	0	0.105566	0	0.126157	0	0.00753813	0.414782	0	0	0.0263129	0.00215317	0	0.00979157	0.18	0.116292	1.04759
TCGA.FG.7637.01A	Pattern A	0	0.157974	0.0439579	0.0830022	0.157637	0	0.0101645	0	0.0608808	0	0.112846	0	0.0561499	0	0.0161933	0.242158	0.0214806	0	0.00470948	0.0139622	0.018884	0	0.74	0.00154164	1.08315
TCGA.FG.7641.01B	Pattern A	0	0.195488	0.0708146	0	0.281625	0	0	0	0.0697559	0	0	0.107649	0.0168317	0	0	0.217014	0	0.0236616	0.00447547	0.012685	0	0	0.48	0.0368415	1.08523
TCGA.FG.8185.01A	Pattern A	0	0.0230468	0.0164052	0	0.0311444	0.0602441	0	0	0.0155645	0	0.019868	0.0325849	0.0471359	0	0.00325702	0.231618	0.0644435	0	0	0.454688	0	0	0.12	0.150995	1.06965
TCGA.FG.8186.01A	Pattern A	0	0.0141607	0.00704063	0.030841	0	0.0601436	0	0.0208329	0	0	0	0.0560694	0.175388	0	0.0181684	0.376744	0.0273495	0	0	0.202096	0	0.011166	0	0.317925	0.964138
TCGA.FG.8187.01A	Pattern A	0	0	0.00223027	0	0.0157055	0.0428981	0	0.0139061	0.0121508	0	0	0.0336798	0.184411	0	0.020343	0.139829	0	0	0	0.534846	0	0	0	0.35841	0.970201
TCGA.FG.8188.01A	Pattern A	0	0.00814703	0.0172359	0.0359433	0	0.00146942	0	0	0.0708202	0	0	0.0675929	0.0577771	0	0.00410137	0.361571	0.0439038	0.0069777	0	0.299633	0.00817428	0.0166532	0	0.335518	0.959315
TCGA.FG.8191.01A	Pattern A	0.00806606	0	0.00631315	0.0337433	0	0.0816267	0	0.0104899	0	0	0	0.0815503	0.043204	0	0	0.183764	0.0216925	0.0219454	0	0.483142	0.00954972	0.0149129	0	0.402449	0.936477
TCGA.FG.A4MY.01A	Pattern A	0	0.0211198	0.0107215	0.0384481	0.0731996	0	0	0.0518766	0	0	0	0.111385	0.0147522	0	0.0314147	0.47226	0.0308502	0	0	0.143972	0	0	0.13	0.145896	1.05143
TCGA.FG.A60J.01A	Pattern A	0	0.0392962	0.0129262	0.0482102	0.0582088	0	0	0.0352778	0.0297889	0	0	0.0717133	0.0297897	0	0.00724634	0.261626	0.0894658	0	0	0.302443	0.0140085	0	0	0.348574	0.947004
TCGA.FG.A70Y.01A	Pattern A	0.0236852	0.00488129	0	0	0	0.139138	0	0	0.0632963	0	0.0172345	0.0341304	0.182869	0	0.00619174	0.457312	0.0217186	0	0.0174739	0.00538717	0	0.0266824	0.05	0.22278	1.00963
TCGA.FG.A70Z.01A	Pattern A	0.0398936	0.0118579	0	0.0413301	0	0.0756728	0	0.0042839	0.0497157	0	0.05481	0.000769046	0.0239768	0.162882	0.0206053	0.444782	0	0	0	0.0627944	0	0.00662734	0.05	0.22458	1.01472
TCGA.FG.A710.01A	Pattern A	0.00628303	0	0.00327002	0.00414408	0	0.091041	0	0.00603911	0.0025789	0	0	0.0509618	0.213397	0	0.066573	0.324872	0.118917	0	0.00227337	0.107208	0	0.00244292	0.01	0.294422	0.97248
TCGA.FG.A87Q.01A	Pattern A	0.036717	0	0	0.0420868	0	0.184976	0	0	0.00397023	0	0.0462594	0.046572	0.0386574	0	0.0706759	0.450413	0.0195513	0	0	0.0499974	0	0.0101232	0.19	0.111886	1.05724
TCGA.HT.7467.01A	Pattern A	0	0.00197644	0.00621075	0.000588474	0	0.172959	0	0	0.134158	0	0.20842	0	0.068377	0.0434761	0.012569	0.103363	0	0	0.234819	0	0.0130823	0	0.86	-0.0200681	1.09703
TCGA.HT.7470.01A	Pattern A	0.0304963	0	0	0	0	0.262237	0	0	0.068728	0	0	0.0910339	0.155032	0	0.0061409	0.275413	0.0221701	0	0	0.0887493	0	0	0.26	0.0713818	1.06887
TCGA.HT.7472.01A	Pattern A	0.000402842	0	0.00136082	0.0211642	0.00254208	0.0219606	0	0.00798434	0	0	0	0.0420735	0.207016	0	0.00644113	0.50233	0.114086	0	0.0689701	0.00366859	0	0	0.04	0.259565	1.00282
TCGA.HT.7473.01A	Pattern A	0.0184041	0.0126431	0.0183323	0.047894	0.00187757	0.0214405	0.0207174	0	0	0	0.0200991	0	0.153809	0	0.00497559	0.520017	0.050166	0	0.0968053	0	0	0.0128188	0	0.412778	0.914713
TCGA.HT.7475.01A	Pattern A	0	0.114128	0.0864562	0.01033	0	0.16151	0	0	0.0749236	0	0.0153429	0.0214274	0.0521029	0.093538	0	0.190831	0	0	0	0.0177928	0	0.161616	0.54	0.0282218	1.08457
TCGA.HT.7478.01A	Pattern A	0.0229672	0	0	0.0843195	0	0.0121337	0	0.000861201	0	0	0	0.0293286	0.161702	0	0.0065122	0.425554	0.0242415	0	0	0.169461	0.00427108	0.0586485	0	0.437989	0.90126
TCGA.HT.7481.01A	Pattern A	0	0.0260673	0	0.0909663	0	0.00253064	0	0.162809	0	0	0	0.069169	0.0837197	0	0.0496719	0.378529	0	0	0.136538	0	0	0	0.43	0.0455538	1.06838
TCGA.HT.7482.01A	Pattern A	0	0	0.0015736	0	0	0.0959067	0	0	0.000652108	0	0.00994764	0.027988	0.365963	0	0	0.192945	0.0229136	0.00213084	0.101483	0.175128	0	0.0033675	0.01	0.29283	0.976979
TCGA.HT.7483.01A	Pattern A	0.0349947	0	0.0255081	0.0472061	0	0.110682	0	0	0.0111787	0	0	0.0813472	0.0573643	0	0.0226823	0.29653	0.103931	0	0	0.179302	0.00850717	0.0207671	0.16	0.126807	1.04276
TCGA.HT.7485.01A	Pattern A	0.0197855	0	0	0	0	0.182929	0	0.00311849	0.0436885	0	0.0302523	0.0499274	0.102382	0	0.00727059	0.3762	0.0294082	0	0.124518	0.0280446	0	0.00247484	0.07	0.188484	1.01017
TCGA.HT.7601.01A	Pattern A	0.018498	0	0	0.0578966	0	0.0287061	0	0	0	0	0	0.0153855	0.173722	0	0.0265493	0.555905	0	0	0.108026	0	0.0153116	0	0	0.47885	0.878519
TCGA.HT.7607.01A	Pattern A	0	0.00502662	0.0102434	0.229979	0.00379638	0	0	0	0.0406719	0	0	0.048822	0.0204027	0	0.0319756	0.26108	0.0928634	0	0.188898	0	0.055408	0.0108322	0.43	0.0429925	1.05794
TCGA.HT.7609.01A	Pattern A	0	0.0320174	0.000770331	0	0	0.0887558	0	0.0137105	0	0	0.0101735	0.0229904	0.144972	0	0	0.233636	0	0.00329778	0	0.448527	0.00114926	0	0	0.371339	0.947838
TCGA.HT.7610.01A	Pattern A	0	0.06471	0.0225992	0	0.0572468	0.0561829	0	0	0.0113546	0	0	0.0662529	0.0817978	0	0	0.0710462	0.033078	0	0	0.531542	0.00418985	0	0.12	0.150739	1.08836
TCGA.HT.7611.01A	Pattern A	0.0177705	0	0	0.0391892	0	0.0940332	0	0	0.0169921	0	0	0.0547659	0.211845	0	0.00832319	0.408519	0	0	0.06829	0.0802723	0	0	0.06	0.216528	1.00929
TCGA.HT.7616.01A	Pattern A	0.0894312	0	0.0872076	0.0578988	0.00764689	0.11135	0.101203	0	0	0	0	0.00928152	0.0455563	0	0.0633904	0.347386	0.0543748	0	0.0192081	0	0	0.00606635	0.04	0.261262	0.975741
TCGA.HT.7620.01A	Pattern A	0	0.0965965	0.0268937	0.0524651	0.0749717	0.00579706	0	0	0.16527	0	0.145883	0	0.0418555	0	0.016497	0.241503	0.021077	0	0.0534031	0	0.0216415	0.0361447	0.11	0.157655	1.02029
TCGA.HT.7676.01A	Pattern A	0.0503547	0	0	0.0338676	0	0.0726535	0	0	0.0251873	0	0.00191545	0.0282388	0.370385	0	0	0.196495	0	0.00308952	0.205455	0	0	0.0123587	0	0.317027	0.958396
TCGA.HT.7680.01A	Pattern A	0.0580749	0	0.0285271	0.0200194	0	0.0665583	0	0.02209	0	0	0	0.0177382	0.0868094	0	0	0.20293	0.00342469	0	0	0.443854	0.00236982	0.0476042	0.01	0.295095	0.987318
TCGA.HT.7686.01A	Pattern A	0.049223	0	0	0.0324848	0	0.0565166	0	0	0.0112574	0	0	0.0163955	0.240265	0	0	0.352372	0.00576176	0.00996358	0.172817	0	0.014542	0.0384016	0.01	0.286649	0.972597
TCGA.HT.7688.01A	Pattern A	0.00666123	0	0.00323752	0.0593013	0	0.267037	0	0	0	0	0	0.134027	0.0481835	0	0.00509388	0.0211671	0.0430744	0	0	0.396428	0.0157898	0	0.06	0.202071	1.05519
TCGA.HT.7689.01A	Pattern A	0	0.0157704	0.00697081	0	0.0371593	0.105633	0	0.00178893	0.0685964	0	0.0313877	0.0368549	0.0256234	0	0.00877635	0.350323	0.053629	0	0.229128	0	0.0121103	0.0162475	0.16	0.125285	1.02777
TCGA.HT.7693.01A	Pattern A	0	0.00201891	0.00364311	0.0167011	0.0287002	0	0	0.01655	0	0	0	0.0293361	0.134775	0	0	0.570827	0	0	0	0.147248	0.00460468	0.0455955	0	0.311768	0.982035
TCGA.HT.7694.01A	Pattern A	0.0756509	0	0	0.0990538	0	0	0	0.0499371	0	0	0	0.105055	0.211878	0	0	0.241694	0	0	0	0.208794	0	0.0079385	0.55	0.0271825	1.10085
TCGA.HT.7695.01A	Pattern A	0	0.0859278	0.000871613	0.0262321	0.0332535	0	0	0.0372326	0	0	0	0.0641728	0.368558	0	0.00553848	0.121414	0	0	0	0.236546	0	0.0202524	0.28	0.0686973	1.09065
TCGA.HT.7854.01A	Pattern A	0.0264153	0	0.000183665	0.034224	0	0.0545995	0	0.0344472	0	0	0	0.0622748	0.0504363	0	0.00508356	0.206067	0.013671	0	0	0.476442	0.0164864	0.0196698	0	0.387673	0.943209
TCGA.HT.7855.01A	Pattern A	0.0653437	0	0	0.00855326	0	0.136363	0	0	0.0364597	0	0.083566	0	0.0218628	0	0.00648148	0.571513	0	0	0	0.0698571	0	0	0.21	0.101409	1.07142
TCGA.HT.7857.01A	Pattern A	0.00437343	0	0.00125795	0.0378276	0	0.0688641	0	0.016177	0.0184847	0	0	0.0661549	0.136543	0	0.021787	0.395689	0.00253155	0	0	0.220755	0.00576817	0.00378743	0	0.380189	0.93243
TCGA.HT.7874.01A	Pattern A	0	0.0516129	0.0467756	0	0.155053	0.0552984	0	0	0.0236147	0	0	0.138462	0.0435896	0	0	0.112667	0.0279687	0.00060603	0	0.270623	0	0.0737288	0.66	0.010309	1.11409
TCGA.HT.7875.01A	Pattern A	0	0.150913	0.0236748	0	0.122375	0	0	0.057972	0	0	0	0.0954932	0.17885	0	0.0217053	0.293371	0	0	0.0556458	0	0	0	0.8	-0.0110408	1.08893
TCGA.HT.7877.01A	Pattern A	0	0.155946	0.0922583	0	0.253151	0	0	0	0	0	0	0.0363367	0.081651	0	0.026636	0.192024	0	0	0	0	0	0.161997	0.57	0.023832	1.08964
TCGA.HT.7881.01A	Pattern A	0	0.102632	0.0366865	0.045544	0	0.232567	0	0	0.18822	0	0.188719	0	0.0628254	0.0488518	0.0426458	0.00021921	0.0211251	0	0.0139251	0	0.0160386	0	0.78	-0.00554679	1.12362
TCGA.HT.7882.01A	Pattern A	0.0510758	0	0	0.0821895	0	0.0266377	0	0.0227019	0.027853	0.00268218	0	0.025352	0.0377183	0	0.00642275	0.458795	0.000902397	0	0	0.199428	0	0.0582411	0.06	0.21261	1.01625
TCGA.HT.7884.01B	Pattern A	0	0.261009	0.0640099	0	0.109	0	0	0	0.119337	0	0.0578624	0	0.0220102	0.0175686	0	0.123541	0	0.00840562	0.181373	0	0.0218575	0.0140259	0.28	0.0697846	1.04677
TCGA.HT.7902.01A	Pattern A	0	0	0.0512253	0.0568631	0.12014	0	0	0	0	0	0.0663363	0.0543236	0.110646	0	0.0339361	0.345659	0	0	0.104426	0	0	0.0564441	0.63	0.015046	1.08025
TCGA.HT.8018.01A	Pattern A	0.025175	0	0	0.0622021	0	0.0830428	0	0.00628908	0	0	0	0.0639989	0.160639	0	0.0281291	0.312965	0.0327862	0	0	0.216768	0	0.00800439	0.09	0.167367	1.03376
TCGA.HT.8105.01A	Pattern A	0	0	0.0186765	0.00217146	0.0471563	0	0	0.150583	0	0	0	0.0680244	0.0407032	0	0.00905598	0.333693	0.0261657	0	0	0.164041	0	0.139729	0.25	0.0762762	1.07569
TCGA.HT.8108.01A	Pattern A	0.00386	0	0.0101265	0	0.00854827	0.0622102	0	0	0	0	0.00470519	0.0100029	0.180525	0	0.0180797	0.527088	0	0	0.169495	0	0	0.00535961	0.02	0.274669	0.988831
TCGA.HT.8109.01A	Pattern A	0.0199461	0	0	0.0502613	0	0.0633966	0	0	0	0	0	0.0503577	0.264486	0	0.00416225	0.436679	0	0	0.045187	0.065524	0	0	0.13	0.147814	1.05134
TCGA.HT.8110.01A	Pattern A	0.00378303	0.0166334	0.00375491	0.00294761	0	0.107109	0	0.0075219	0	0	0.0142023	0	0.0923267	0	0.0249199	0.574478	0	0	0.10157	0	0.00326431	0.0474885	0	0.332284	0.959751
TCGA.HT.8111.01A	Pattern A	0.0464795	0	0.00677565	0.0398421	0	0.0764342	0	0	0.028058	0	0.0501285	0	0.178494	0	0.016031	0.434528	0.0275161	0	0.0884835	0	0	0.00722968	0.05	0.224207	1.0015
TCGA.HT.8114.01A	Pattern A	0.0194679	0	0.00245044	0.0369161	0.0111219	0.054492	0	0.0116144	0	0	0.00205395	0.0397177	0.229582	0	0.00713944	0.441856	0.0188835	0.00202669	0	0.115805	0	0.00687369	0.02	0.270469	0.991302
TCGA.HT.8563.01A	Pattern A	0.0556129	0	0.0011701	0.0593948	0	0.0386903	0	0	0.0209061	0	0	0.0204184	0.0801193	0	0.0581204	0.467076	0.0314167	0	0.11507	0	0	0.0520049	0	0.391192	0.922397
TCGA.HT.8564.01A	Pattern A	0	0.0104543	0.00109047	0.0699371	0	0.0312462	0	0.0153056	0	0	0.00403575	0.0308915	0.251916	0	0.0748697	0.36398	0	0	0.146273	0	0	0	0.24	0.0879799	1.06387
TCGA.HT.A5R7.01A	Pattern A	0	0.0275532	0.0177965	0.0632834	0	0.183265	0	0	0.0417096	0	0.0106777	0.0343472	0.0286736	0.0435763	0.0243844	0.101759	0.100804	0	0.239114	0	0.0830559	0	0.67	0.00630214	1.05974
TCGA.HT.A5R9.01A	Pattern A	0	0.128455	0.0963585	0.107587	0.00259825	0	0	0.0971656	0	0	0	0.178631	0.0668251	0.00844393	0.0195943	0.137746	0	0	0	0.0559706	0	0.100625	0.8	-0.0121071	1.11518
TCGA.HT.A5RB.01A	Pattern A	0	0.0780271	0.0970544	0	0.02948	0.06774	0	0	0	0	0	0.0305983	0.14723	0	0.0095775	0.206233	0	0	0	0.33406	0	0	0.49	0.0361655	1.09275
TCGA.HT.A614.01A	Pattern A	0.063587	0	0	0	0.0874076	0	0	0.0314291	0	0	0	0.0342818	0.280153	0	0.0083029	0.400549	0	0	0.0611471	0.0331419	0	0	0.2	0.108232	1.06323
TCGA.HT.A615.01A	Pattern A	0.00754724	0.00240777	0	0.0586592	0	0.0735365	0	0.00514871	0.0269722	0	0	0.0494906	0.121091	0	0.00512739	0.575383	0.019597	0.00164213	0.0432609	0	0	0.010137	0	0.332731	0.960878
TCGA.HT.A617.01A	Pattern A	0.0353552	0	0.0214045	0.0567843	0	0.0319353	0	0	0.000347366	0.0420961	0	0.00404998	0	0	0.028893	0.685004	0.0429054	0	0.0512245	0	0	0	0.14	0.141002	1.07216
TCGA.HT.A61B.01A	Pattern A	0.0316497	0	0	0.0343403	0.00379302	0.00352975	0	0	0	0	0	0.031025	0.149511	0	0.0164409	0.566252	0.0563466	0	0.107111	0	0	0	0	0.415699	0.916352
TCGA.HT.A74J.01A	Pattern A	0.00682138	0.0194284	0	0.0225484	0.0954892	0.0261414	0	0	0.0576404	0	0	0.0891145	0.0740035	0	0.0092229	0.296151	0.036302	0	0	0.240401	0.000984419	0.0257519	0.21	0.0988797	1.06594
TCGA.HT.A74L.01A	Pattern A	0	0.0433903	0.020968	0.0120128	0.0974429	0	0	0	0.0264714	0	0.0399907	0	0.0196993	0	0	0.558976	0	0.00653338	0	0.11728	0.0333902	0.0238453	0.17	0.122195	1.06142
TCGA.HW.7486.01A	Pattern A	0	0.00859161	0.0127337	0.0729748	0	0.127572	0	0	0.0827068	0	0.0386247	0.017581	0.0795366	0	0.0193903	0.284238	0.0567913	0	0.131316	0	0.0104928	0.0574505	0.08	0.173679	1.01008
TCGA.HW.7487.01A	Pattern A	0.0949685	0	0	0	0	0.296566	0	0	0.0394217	0	0.014068	0.0956147	0.0333078	0	0.0183542	0.284193	0.0199365	0	0	0.0887068	0	0.0148637	0.59	0.0194244	1.09175
TCGA.HW.7489.01A	Pattern A	0	0	0.0100736	0.0812282	0.0739912	0	0	0	0	0	0	0.0844487	0.0371377	0	0.00589061	0.147206	0.155502	0	0	0.388795	0.0157263	0	0.12	0.154043	1.05897
TCGA.HW.7490.01A	Pattern A	0.0373863	0	0.0395681	0.0364747	0	0.0364786	0	0.0018198	0	0	0	0.0736175	0.0949122	0	0.0447276	0.352786	0.103235	0	0	0.149902	0.0176645	0.0114285	0.03	0.265138	0.984005
TCGA.HW.7493.01A	Pattern A	0	0.00961935	0.0130658	0.021088	0	0.0824924	0	0.0208624	0	0	0	0.0332313	0.162025	0	0.0309593	0.196768	0.0169208	0	0	0.360416	0	0.0525514	0	0.422991	0.910497
TCGA.HW.7495.01A	Pattern A	0	0.0137011	0.000276861	0	0.0514294	0.0154355	0	0.115717	0	0	0	0.0555092	0.286818	0	0	0.337598	0	0	0	0.123516	0	0	0.58	0.0221438	1.1028
TCGA.HW.8320.01A	Pattern A	0	0	0.0126848	0.00628065	0.0448629	0	0	0.0308094	0.0173643	0	0.000353508	0.0250177	0.020989	0	0.00680525	0.0714551	0.0915343	0	0	0.646202	0.0125186	0.0131226	0	0.564937	0.833382
TCGA.HW.8321.01A	Pattern A	0.0287179	0	0.00753752	0.0182653	0.0116298	0.0749258	0	0	0.0158068	0	0	0.142734	0.0553158	0	0.0069313	0.190798	0.0434638	0	0	0.36195	0.0058589	0.036066	0	0.535244	0.844432
TCGA.HW.A5KK.01A	Pattern A	0.00951746	0	0	0.042947	0	0.0673621	0	0.0397884	0	0	0	0.116412	0.0664701	0	0.00223531	0.15801	0.127061	0	0	0.347907	0.0061733	0.0161167	0.16	0.130579	1.06961
TCGA.HW.A5KM.01A	Pattern A	0.00991785	0	3.79902e-05	0.0118841	0	0.028573	0	0	0	0	0	0.0142677	0.24989	0	0.0303656	0.477492	0.00603206	0	0.168255	0	0	0.00328476	0	0.404439	0.921113
TCGA.IK.7675.01A	Pattern A	0.0126488	0	0.0125323	0	0	0.170192	0	0	0	0	0	0.115999	0.0212903	0	0	0.439039	0.0172541	0	0	0.210339	0	0.000705194	0.26	0.0709014	1.09355
TCGA.IK.8125.01A	Pattern A	0	0.044907	0.0144817	0.0265728	0.00216171	0.131198	0	0	0.0824251	0	0.128305	0	0.0514206	0	0.0121915	0.363513	0.00626093	0	0.0996688	0	0	0.0368939	0.3	0.0631455	1.0597
TCGA.KT.A74X.01A	Pattern A	0	0.0518875	0.0262275	0.140881	0	0.0406497	0	0	0.0190273	0	0	0.116197	0.0373648	0	0.0244077	0.465752	0.0682691	0	0	0	0	0.00933611	0.25	0.0761274	1.07741
TCGA.P5.A5ET.01A	Pattern A	0	0.0688315	0.0295273	0	0.152168	0.112824	0	0	0.134125	0	0.0293668	0.0720052	0.0414405	0	0.00544646	0.24012	0	0	0.101538	0	0	0.0126067	0.47	0.0375712	1.07353
TCGA.P5.A5EV.01A	Pattern A	0.0159124	0	0	0.0659079	0.0426893	0	0	0	0	0	0.0563562	0.0254193	0.183011	0	0.0604428	0.300004	0.0315502	0	0.218707	0	0	0	0.13	0.143605	1.02519
TCGA.P5.A5EW.01A	Pattern A	0	0.0048877	0.00279208	0.0304064	0	0.0707625	0	0	0.0355388	0	0.00931419	0.0203225	0.144471	0	0	0.189842	0.00718949	0.00600264	0	0.475919	0	0.00255112	0	0.44548	0.904071
TCGA.P5.A5F0.01A	Pattern A	0	0.175848	0.0458948	0.0143977	0	0.168587	0	0.0185762	0.170967	0	0.173007	0	0.042448	0.0532387	0	0.0676154	0	0	0.0694194	0	0	0	0.9	-0.026048	1.11119
TCGA.P5.A5F2.01A	Pattern A	0	0.0495118	0.0278772	0	0.133021	0	0	0.00261178	0.0043489	0	0	0.0746119	0.0694508	0	0	0.212558	0.00372116	0	0	0.422288	0	0	0.16	0.12483	1.07909
TCGA.P5.A72Z.01A	Pattern A	0.0921456	0	0	0.0460973	0.0660192	0.0264103	0	0.0556998	0.149182	0	0.0817913	0.08938	0.0964832	0	0	0.260132	0.0278771	0.00490408	0	0	0.00387774	0	0.99	-0.0632956	1.13245
TCGA.P5.A730.01A	Pattern A	0	0	0.0484863	0.00912934	0	0.10139	0	0	0.0612369	0	0.0389072	0.0213148	0.0218397	0	0.0653868	0.460334	0.150942	0	0	0.0210326	0	0	0.43	0.044981	1.0852
TCGA.P5.A735.01A	Pattern A	0	0.022172	0.00883765	0	0	0.143052	0	0.00117494	0.0517338	0	0.0766862	0.0530987	0.150193	0	0	0.291787	0	0.00258107	0.196967	0	0	0.00171562	0.2	0.108325	1.0377
TCGA.P5.A77W.01A	Pattern A	0.0288524	0.0590324	0	0	0	0.0735933	0	0.107165	0	0	0.0420798	0.0280699	0	0	0	0.479328	0.00657163	0	0.175308	0	0	0	0.8	-0.0101322	1.09391
TCGA.P5.A77X.01A	Pattern A	0	0.170435	0.0641779	0	0.285314	0	0	0	0.0554156	0	0	0.118933	0.00721444	0	0.00480072	0.247404	0	0	0.0463058	0	0	0	0.39	0.0493711	1.07725
TCGA.P5.A780.01A	Pattern A	0	0	0	0.00547303	0	0.0503538	0	0.0433564	0.00401422	0	0	0.0299738	0.141162	0	0	0.184316	0	0	0	0.541351	0	0	0	0.548448	0.839611
TCGA.P5.A781.01A	Pattern A	0	0.027597	0.00208737	0.0287493	0.12334	0	0	0	0.101059	0	0.0787474	0.0136041	0.13301	0	0.02582	0.326944	0.0567184	0	0.0613153	0	0.00286737	0.01814	0.09	0.165616	1.01871
TCGA.QH.A65Z.01A	Pattern A	0	0.0683096	0.0338403	0	0.0821631	0	0	0.0309444	0	0	0	0.0759747	0.0279875	0	0.00247801	0.091216	0.0328387	0	0	0.540878	0.00617953	0.00719062	0.13	0.143956	1.09758
TCGA.QH.A6CW.01A	Pattern A	0	0.0184794	0.0122959	0.0152057	0.037397	0.0308566	0	0.00652801	0.0122047	0	0.0396338	0.0138656	0.0721133	0	0.00375064	0.151505	0.0305336	0	0	0.537601	0.0125364	0.00549299	0	0.49671	0.8743
TCGA.QH.A6CZ.01A	Pattern A	0	0.0513777	0.00742223	0	0.0299082	7.71992e-06	0	0.0328503	0	0	0	0.0303155	0.195979	0	0	0.051448	0.0586001	0	0	0.542091	0	0	0.05	0.22577	1.0474
TCGA.QH.A6X3.01A	Pattern A	0	0	0.0137164	0.00951212	0	0.0788442	0	0.0164102	0	0	0	0.0914344	0.0228994	0	0.00304507	0.292233	0.0759334	0	0	0.388072	0.00790057	0	0	0.420114	0.918302
TCGA.QH.A6X4.01A	Pattern A	0	0.149233	0.017507	0	0.173283	0	0	0	0.0670947	0	0.160761	0	0.0215612	0	0	0.270215	0	0.00389373	0.114112	0	0.0223385	0	0.73	0.00214913	1.07724
TCGA.QH.A6X8.01A	Pattern A	0.00284054	0	0	0	0.0649292	0	0	0.138268	0	0	0	0.141794	0.202142	0.0550902	0.0162999	0.257296	0	0	0.12134	0	0	0	0.26	0.0727207	1.06462
TCGA.QH.A6X9.01A	Pattern A	0	0.0301959	0.00410421	0	0	0.140919	0	0	0.0459062	0	0.0326403	0.0880535	0.312806	0	0	0.235979	0	0.00482616	0	0.10457	0	0	0.2	0.106161	1.06234
TCGA.QH.A6XA.01A	Pattern A	0	0.0354209	0.0108338	0	0	0.0834237	0	0	0.0230062	0	0.0537767	0.0040855	0.112536	0	0.000910053	0.239433	0.00644837	0	0	0.425933	0	0.00419193	0	0.37936	0.938457
TCGA.QH.A6XC.01A	Pattern A	0	0.0372446	0.00825561	0	0	0.0862486	0	0.0579416	0	0	0	0.0736569	0.186372	0	0.0553277	0.399893	0	0.0105108	0.0845499	0	0	0	0.25	0.0778644	1.06422
TCGA.QH.A870.01A	Pattern A	0	0.185665	0.0883352	0.0416419	0.107535	0	0	0	0	0	0	0.0774604	0.0104989	0	0	0.24605	0.00133184	0.0133061	0	0.199884	0.0226708	0.0056213	0.29	0.0677044	1.06524
TCGA.R8.A6MK.01A	Pattern A	0	0.0877082	0.00522301	0	0.0558296	0.0494723	0	0.0141798	0	0	0	0.0524116	0.270239	0	0.00570407	0.296391	0	0	0.162841	0	0	0	0.16	0.128125	1.03664
TCGA.RY.A83Y.01A	Pattern A	0	0.0383678	0.0146359	0.0545601	0.0992602	0	0	0.0143838	0.00518577	0	0	0.0510572	0	0	0.00677417	0.409771	0.28125	0	0	0.0247535	0	0	0.06	0.196258	1.01794
TCGA.RY.A840.01A	Pattern A	0	0.0902898	0.02854	0	0.149319	0	0	0.00159348	0	0	0.0236798	0.0295976	0.0840427	0	0.00718022	0.585758	0	0	0	0	0	0	0.25	0.0776138	1.0857
TCGA.RY.A843.01A	Pattern A	0	0.0450098	0.0156978	0.0173849	0.0734751	0	0	0	0.0279903	0	0.0934837	0	0.0277071	0	0	0.613399	0	0.0414826	0	0.0189391	0.0254302	0	0.2	0.105306	1.07464
TCGA.RY.A845.01A	Pattern A	0	0.0156635	0	0	0.103265	0.0137111	0	0	0	0	0	0.0723032	0.340282	0	0	0.338342	0	0	0.0418946	0.074539	0	0	0.15	0.134357	1.05779
TCGA.S9.A6TV.01A	Pattern A	0	0.0226245	0.0204179	0.0131128	0	0.0654842	0	0.000447766	0.000407584	0	0	0.0604137	0.260406	0	0.0538623	0.419486	0	0.00239607	0.067881	0	0	0.0130594	0.06	0.203459	1.02072
TCGA.S9.A6TX.01A	Pattern A	0.036968	0	0	0	0.147784	0.068636	0	0	0.129102	0	0.183225	0	0.0327998	0	0	0.221252	0.0807211	0.0162429	0.0774715	0	0.00579766	0	0.67	0.007606	1.08753
TCGA.S9.A6TY.01A	Pattern A	0	0.12275	0.0417563	0.10507	0.0417743	0	0	0.0243115	0.000528602	0	0	0.100747	0.0687107	0	0	0.443365	0	0	0.0509875	0	0	0	0.99	-0.056631	1.12025
TCGA.S9.A6U2.01A	Pattern A	0	0.0618306	0.00565013	0.0188911	0.0490354	0	0	0.0397896	0	0	0	0.0435271	0.118535	0	0.00442019	0.339756	0	0	0	0.318565	0	0	0.09	0.166865	1.04376
TCGA.S9.A6U5.01A	Pattern A	0	0.0493998	0.0182286	0.143122	0	0	0.00103764	0	0.0296569	0	0.0266228	0	0.00547792	0	0.00944948	0.424928	0.223114	0	0.068963	0	0	0	0.05	0.243985	0.991204
TCGA.S9.A6U8.01A	Pattern A	0	0.0054032	0.012961	0	0	0.100877	0	0	0.0450516	0	0.0304693	0.0659673	0.217757	0	0.0022168	0.329766	0	0	0.0748384	0.114692	0	0	0.05	0.237855	0.995902
TCGA.S9.A6U9.01A	Pattern A	0.0922901	0	0	0.00600451	0.00597985	0.0669495	0	0.0147014	0	0	0	0.0857405	0.121884	0	0.00418233	0.311358	0.0542689	0	0	0.215995	0.0125365	0.0081095	0	0.400044	0.919211
TCGA.S9.A6WE.01A	Pattern A	0	0.0281641	0.0155825	0	0.210864	0.0511599	0	0	0.0767805	0	0.101006	0	0.0448059	0	0.00946608	0.292562	0.0386342	0	0.111852	0	0.014264	0.0048586	0.52	0.0315212	1.06798
TCGA.S9.A6WG.01A	Pattern A	0.0365114	0	0.00714023	0.0149393	0	0.10861	0	0	0.0293562	0	0	0.0730742	0.0726314	0	0.0449272	0.0709869	0.0452986	0	0	0.415841	0	0.0806843	0	0.350179	0.957196
TCGA.S9.A6WL.01A	Pattern A	0	0.0553105	0.0218636	0.00866223	0.102428	0	0.0289705	0	0	0	0	0.0338912	0.174353	0	0	0.437058	0	0	0.137464	0	0	0	0.66	0.00964442	1.09118
TCGA.S9.A6WN.01A	Pattern A	0.0562745	0	0	0.0915703	0	0.0729151	0	0.0058655	0.0420172	0	0.0247827	0.00985562	0.0664681	0	0.00354265	0.42737	0.0458599	0	0.102163	0	0	0.0513157	0.26	0.0717514	1.06247
TCGA.S9.A6WP.01A	Pattern A	0.0184319	0	0	0.116152	0	0	0	0.0295312	0	0	0	0.0622067	0.103801	0	0.00785992	0.539112	0.0394738	0	0.0834313	0	0	0	0.06	0.217423	1.01471
TCGA.S9.A7IX.01A	Pattern A	0.0650137	0	0	0.0420097	0	0.0781142	0	0.00480521	0	0	0.0365376	0.0644816	0.192564	0	0.00460986	0.416792	0.00849072	0	0	0.0760988	0	0.0104823	0.3	0.0627661	1.08323
TCGA.S9.A7IY.01A	Pattern A	0.00481488	0.0192076	0.0180491	0.0239299	0	0.123773	0	0	0.00800884	0	0	0.0735372	0.178964	0	0	0.379012	0.00784011	0.00354579	0.00997817	0.101644	0	0.0476949	0.08	0.177647	1.02788
TCGA.S9.A7J1.01A	Pattern A	0	0.0419945	0.0340485	0	0.139408	0	0	0.0121874	0.0631969	0	0	0.12646	0.0485106	0	0.0227913	0.442173	0.00611097	0	0	0.0572996	0.00581897	0	0.23	0.0902599	1.06692
TCGA.S9.A7J2.01A	Pattern A	0	0.0528608	0	0	0.0604226	0	0	0.0216934	0.00155031	0	0	0.0581604	0.1415	0	0	0.157925	0.00604692	0	0	0.491514	0	0.00832638	0.06	0.194265	1.05904
TCGA.S9.A7QW.01A	Pattern A	0	0.0822378	0.0240131	0	0.0819308	0	0	0.0483233	0	0	0	0.0398938	0.129832	0	0	0.214327	0	0	0	0.379442	0	0	0.05	0.252748	1.0005
TCGA.S9.A7QZ.01A	Pattern A	0	0.102565	0.061461	0.031599	0.102325	0	0	0.0865596	0	0	0	0.102488	0.0117831	0	0.0474246	0.42719	0	0	0.026605	0	0	0	0.99	-0.0433284	1.11216
TCGA.S9.A7R3.01A	Pattern A	0	0.0125033	0.0144391	0.0394312	0.0197359	0	0	0.00416823	0.00986767	0	0	0.0509454	0.0342501	0	0	0.613496	0.0305349	0.0180301	0	0.115353	0.0210633	0.016182	0	0.309634	0.980004
TCGA.S9.A7R4.01A	Pattern A	0.00671794	0	0.000960074	0.0170178	0	0.0904079	0	0.00121452	0	0	0	0.0993475	0.0304064	0	0.00416743	0.354388	0.0285685	0	0	0.357878	0.000250015	0.00867559	0	0.545215	0.838039
TCGA.S9.A7R7.01A	Pattern A	0.0883109	0	0	0.0468753	0	0.117316	0	0	0.0259181	0	0.0412614	0.0110314	0.120848	0	0.00733481	0.488586	0.00270986	0	0.0367839	0	0	0.013024	0.08	0.168789	1.03072
TCGA.S9.A89V.01A	Pattern A	0.0207455	0	0	0.0280571	0	0.0482977	0	0.0295573	0	0	0	0.0470535	0.255002	0	0.00140793	0.244963	0.0378973	0	0	0.287019	0	0	0.38	0.0503405	1.0989
TCGA.TM.A7CA.01A	Pattern A	0	0.0998039	0	0	0.059761	0.00312795	0	0.0129432	0	0	0	0.0662676	0.245386	0	0.00934491	0.345501	0	0	0.139431	0.0184334	0	0	0.28	0.0698075	1.06577
TCGA.TM.A84C.01A	Pattern A	0.0473317	0	0	0.0385907	0	0.0686053	0	0.156303	0	0	0	0.133965	0.108329	0	0.00430399	0.136296	0.0469583	0	0	0.212104	0.031413	0.0157996	0.5	0.0346865	1.09498
TCGA.TM.A84L.01A	Pattern A	0	0.044184	0.00734916	0.00693825	0.00497818	0.0438908	0	0.00640625	0.0170921	0	0	0.0421093	0.143739	0	0.000691497	0.297311	0.0186891	0	0	0.359494	0	0.00712743	0	0.45254	0.894923
TCGA.TM.A84O.01A	Pattern A	0	0.0835301	0.0688455	0.0528373	0.066727	0	0	0	0.0962569	0	0.0938226	0	0.0250657	0	0	0.376032	0.0500347	0.00637959	0.0804681	0	0	0	0.25	0.08132	1.0479
TCGA.TM.A84S.01A	Pattern A	0	0.0464903	0.00979558	0.0461733	0.0314639	0.048386	0	0.0143412	0.0882598	0	0.0491837	0.0553559	0.0391958	0	0.0385481	0.405056	0.0610934	0	0.054062	0	0.0125948	0	0.14	0.142241	1.03242
TCGA.TM.A84T.01A	Pattern A	0.0202563	0	0	0.0253471	0	0.103864	0	0	0.0297229	0	0.0104181	0.0394188	0.193536	0	8.47258e-05	0.404643	0	0.00223945	0.162739	0	0	0.00773053	0.06	0.211383	1.00527
TCGA.TQ.A7RF.01A	Pattern A	0.047251	0	0.0222491	0.0101215	0	0.139417	0	0	0.099941	0	0.0173651	0.0593136	0.0359236	0	0	0.413379	0.0281486	0	0	0.0910469	0.0218689	0.0139748	0.22	0.0946294	1.0577
TCGA.TQ.A7RG.01A	Pattern A	0	0.0374326	0.0160247	0.081602	0.16869	0	0	0.00614669	0	0	0.00816224	0.0625101	0.0854327	0	0.0224593	0.264283	0.0807488	0	0	0.151552	0.00409451	0.0108613	0.14	0.141836	1.03137
TCGA.TQ.A7RH.01A	Pattern A	0.0385517	0	0	0.0298411	0.00393729	0	0	0.0167697	0.0152019	0	0	0.0582313	0.0876565	0	0.00168252	0.527773	0.0804876	0	0	0.128573	0	0.0112946	0	0.358217	0.948456
TCGA.TQ.A7RI.01A	Pattern A	0	0.0724962	0.0217953	0.00786269	0.0840305	0	0	0	0.054351	0	0.155355	0	0.0182128	0	0	0.345471	0	0.0260813	0.195731	0	0.0146934	0.00391945	0.49	0.0354835	1.06076
TCGA.TQ.A7RJ.01A	Pattern A	0.0502173	0	0	0.0166865	0	0.12406	0	0	0.0759924	0	0.0392353	0.0268193	0.118554	0	0.00502581	0.466859	0.0149448	0	0	0.0305662	0.000385962	0.0306532	0.06	0.214157	1.01082
TCGA.TQ.A7RN.01A	Pattern A	0.148636	0	0	0	0.137347	0.127905	0	0	0.0912525	0	0.178602	0	0.0261514	0	0.00219916	0.101697	0.12114	0	0	0.0290813	0.0359899	0	0.25	0.0759105	1.06591
TCGA.TQ.A7RR.01A	Pattern A	0.00342108	0	0.00227609	0	0	0.160258	0	0	0.0371549	0	0	0.126673	0.0795393	0	0.000629973	0.377887	0.0353318	0	0	0.161148	0	0.0156809	0.15	0.133786	1.05534
TCGA.TQ.A7RW.01A	Pattern A	0.00197567	0	0.00517637	0.00900827	0	0.0784744	0	0	0	0	0	0.0402317	0.165865	0	0.000610175	0.60613	0.0225797	0.00166846	0.0231078	0.0451725	0	0	0	0.310781	0.981653
TCGA.VM.A8CB.01A	Pattern A	0	0.0820191	0.013213	0.144301	0	0	0	0.0902281	0	0	0.0472515	0.0614608	0.106631	0	0.0125274	0.392862	0	0	0.0274781	0	0	0.0220283	0.77	-0.00283982	1.09786
TCGA.VM.A8CD.01A	Pattern A	0.0497566	0	0	0	0	0.151916	0	0	0	0	0	0.0603207	0.188702	0	0.0592637	0.302573	0.0294011	0.0103485	0	0.127944	0.00613959	0.0136358	0.6	0.0179538	1.0916
TCGA.VM.A8CE.01A	Pattern A	0.08065	0	0	0	0.0578601	0.0141527	0	0.0857329	0	0	0	0.0961046	0.278584	0	0.0195761	0.230368	0.0580158	0	0.0157536	0.0602755	0	0.00292646	0.41	0.04832	1.0769
TCGA.VM.A8CH.01A	Pattern A	0.0426877	0	0	0.0218383	0.0156753	0.0310242	0	0	0.00895006	0	0.007732	0.0369535	0.0983803	0	0.00610081	0.582531	0.0703564	0	0.0712577	0	0	0.00651235	0.05	0.236829	1.01274
TCGA.VV.A829.01A	Pattern A	0	0.0243656	0.0157605	0.012624	0	0.0997715	0	0.00142886	0	0	0.0250215	0.0404898	0.0904577	0	0	0.413992	0.0640175	0	0	0.209977	0.0020948	0	0.13	0.145886	1.04695
TCGA.VW.A7QS.01A	Pattern A	0	0.244083	0.148631	0.017845	0.0454442	0	0	0	0.06696	0	0.0193595	0.010219	0.0287556	0.0288838	0	0.282332	0.00658147	0	0.0312336	0	0.0696723	0	0.77	-0.0027085	1.08969
TCGA.VW.A8FI.01A	Pattern A	0	0.0291662	0.0130942	0.0347367	0	0.157711	0	0.0280655	0.0147811	0	0	0.131466	0.0467719	0	0.0326161	0.351017	0	0	0	0.150533	0	0.0100403	0.16	0.130354	1.05279
TCGA.W9.A837.01A	Pattern A	0.0755052	0	0	0	0	0.162908	0	0	0.141673	0	0.0514914	0.0891889	0.0526943	0	0	0	0.0564312	0.0329394	0	0.295461	0.0417072	0	0.57	0.0235147	1.11171
TCGA.WY.A85B.01A	Pattern A	0	0.0217097	0.0137691	0.0474055	0	0.120914	0	0.00388519	0	0	0	0.0708399	0.128747	0	0.000761844	0.448474	0.0235142	0.00293154	0.0581043	0.039269	0	0.0196752	0	0.410367	0.913145
TCGA.WY.A85C.01A	Pattern A	0.00531645	0	0.00656013	0.0022118	0.011985	0.0137056	0	0.0417746	0.0113189	0	0	0.0315395	0.114481	0	0	0.131704	0.0164275	0	0	0.601794	0	0.0111818	0	0.435011	0.928301
TCGA.WY.A85D.01A	Pattern A	0	0.0231437	0.0209926	0.035888	0.0608787	0	0	0	0.015486	0	0	0.0451871	0.102616	0	0.00661787	0.297496	0.0846171	0	0	0.285372	0	0.0217055	0.05	0.235911	1.00344
TCGA.WY.A85E.01A	Pattern A	0	0.0736776	0.0237443	0	0.0726815	0.0370232	0	0.045406	0	0	0	0.126559	0.130306	0	0	0.197533	0.00764965	3.42415e-05	0	0.285385	0	0	0.31	0.0594078	1.09118
CGGA_1006	Pattern B	0.119896	0	0	0	0.0102057	0.0828542	0	0.0447583	0	0	0	0.107834	0.12267	0	0.0926402	0.359997	0.0209649	0	0.0381788	0	0	0	0.16	0.128925	1.04398
CGGA_1008	Pattern B	0	0.039023	0.00589418	0	0	0.0758508	0	0.0631823	0.0607252	0	0.0535157	0.02948	0.0212731	0.0751959	0.0503047	0.401551	0	0	0	0.124004	0	0	0.32	0.0563241	1.08057
CGGA_1018	Pattern B	0	0.0613959	0	0.0262336	0.00669198	0.013969	0	0.0687031	0	0	0	0.0651153	0.190787	0	0.00320817	0.468787	0	0	0	0.0951093	0	0	0.68	0.00525198	1.11519
CGGA_1020	Pattern B	0.0420225	0	0	0.0874548	0	0.0790947	0	0	0.0169513	0	0.0561406	0.0546754	0.0945647	0	0.00967833	0.420488	0.0314988	0	0	0.0743607	0.0203588	0.0127115	0.06	0.211451	1.01022
CGGA_1024	Pattern B	0	0.0656194	0.0124027	0.0428744	0.000458696	0	0	0	0.00128613	0	0	0.0145429	0.103224	0	0.0109804	0.63841	0	0	0.0893477	0	0	0.0208535	0.31	0.0577224	1.1108
CGGA_1026	Pattern B	0.205346	0	0	0	0	0.160866	0	0	0.0736122	0	0.106395	0.00606974	0.0279926	0	0.000532504	0.286901	0	0.0115661	0.0732912	0	0	0.0474287	0.29	0.0662019	1.0602
CGGA_103	Pattern B	0	0.028653	0.0181252	0.0167562	0	0.0818638	0	0.0106092	0.0603922	0	0.149249	0	0.0291724	0	0.015113	0.174337	0.0660998	0	0.253662	0	0.0116179	0.0843494	0.56	0.0260753	1.0588
CGGA_1036	Pattern B	0	0.0328626	0.00258668	0	0	0.102226	0	0.0127765	0.0339918	0	0.0191112	0	0	0.219449	0.0167266	0.42481	0.0604605	0	0.0233806	0	0	0.0516188	0.02	0.278505	0.995597
CGGA_1039	Pattern B	0.0671396	0	0	0.0620695	0	0.0908776	0	0	0.0683036	0	0.0395118	0.0165424	0.0166898	0	0	0.494807	0	0.0266837	0.112726	0	0.00464845	0	0.46	0.0394739	1.07905
CGGA_1045	Pattern B	0	0	0.00844542	0.032564	0	0.0486334	0	0.0173664	0.0196069	0	0.0524702	0	0.14788	0.046913	0.0057111	0.509186	0	0.00158658	0.0124258	0.0449533	0.0376927	0.0145654	0.25	0.0799538	1.08703
CGGA_1055	Pattern B	0	0.00675273	0.000125799	0.0123077	0	0.0953758	0	0	0	0	0.00795006	0.0209346	0.193156	0	0.00622525	0.520647	0	0.00568942	0.119735	0	0	0.0111008	0.06	0.210325	1.02129
CGGA_1060	Pattern B	0.0396505	0	0	0.0228143	0	0.202097	0	0	0.131887	0	0.058688	0	0.0372951	0	0.00850637	0.45455	0.0359145	0.00859739	0	0	0	0	0.5	0.033139	1.09164
CGGA_1065	Pattern B	0	0.0143517	0.0164457	0.0326347	0	0.239521	0	0.0354851	0.0797165	0	0.134038	0.0415736	0.0587985	0	0	0.278777	0	0	0	0.0626457	0	0.00601172	0.6	0.01791	1.10169
CGGA_1068	Pattern B	0.0655098	0	0.027269	0.0731336	0	0.106752	0	0	0	0	0	0	0.0345781	0	0.00763862	0.583553	0.000517167	0	0.0517949	0	0	0.0492543	0.12	0.150982	1.04833
CGGA_107	Pattern B	0.0530432	0	0.00716924	0	0	0.132905	0	0.01871	0.0955535	0	0	0	0	0.153148	0.00109861	0.319964	0	0.0140582	0	0.135118	0.0670992	0.00213381	0.25	0.0746205	1.07222
CGGA_1070	Pattern B	0.0266719	0	0.00276496	0.049442	0	0.123267	0	0	0.07175	0	0.023821	0.0262384	0.0127406	0	0.0509322	0.543204	0	0	0.002535	0.0476805	0	0.0189525	0.33	0.055648	1.09012
CGGA_1072	Pattern B	0.0547799	0	0	0.00169751	0	0.060717	0	0.0327383	0	0	0	0.0359686	0.120985	0	0.0992244	0.521224	0	0	0.051285	0.00035905	0	0.0210217	0.15	0.132068	1.06025
CGGA_1075	Pattern B	0.0761773	0	0.0229773	0.084492	0	0.0344394	0	0.0653955	0.032933	0	0	0.00656374	0.0218352	0.117172	0.0577483	0.440506	0	0	0.0364949	0	0	0.00326518	0.17	0.123139	1.05284
CGGA_108	Pattern B	0.0163667	0	0	0.0489542	0	0.0411634	0	0.0175265	0.0176764	0	0.0123163	0.0129602	0	0.293574	0	0.452332	0	0	0	0.0755122	0	0.0116185	0.06	0.21672	1.04844
CGGA_1091	Pattern B	0	0.0361917	0.0084547	0.00136698	0	0.0887806	0	0	0.0595252	0	0.0267737	0	0	0.0800544	0.00326598	0.498752	0	0	0.183822	0	0	0.0130132	0.24	0.0881445	1.06714
CGGA_1094	Pattern B	0.0526942	0	0	0.016896	0	0.0604234	0	0.000909418	0	0	0	0.0626682	0.125947	0	0.0150786	0.550756	0	0	0.114627	0	0	0	0.18	0.116978	1.06388
CGGA_1097	Pattern B	0.0301459	0.00346305	0	0	0	0.185709	0	0	0.0936492	0	0.122513	0	0.0322612	0	0.00764469	0.426244	0	0	0.0926127	0	0	0.00575648	0.33	0.0547936	1.07153
CGGA_1103	Pattern B	0.137605	0	0.00379685	0.0344245	0	0.151795	0	0	0.022874	0	0	0.0564542	0.034454	0.123737	0	0.373579	0	0.0144584	0	0.0123226	0	0.0345001	0.24	0.0893541	1.06666
CGGA_1105	Pattern B	0.0192539	0	0	0.0762408	0	0	0	0.0605518	0	0	0	0.0633826	0.0916766	0.125505	0.0429759	0.449271	0	0	0.066671	0	0	0.00447176	0.2	0.11058	1.06643
CGGA_1106	Pattern B	0.0373808	0	0	0.0100701	0	0.191141	0	0.0244654	0.0191614	0	0.0392236	0.0136618	0.115654	0.106828	0.000106706	0.349582	0	0.0164786	0	0.0504884	0.00338911	0.0223681	0.31	0.0570149	1.07752
CGGA_1108	Pattern B	0.05955	0	0	0.0796364	0	0.0657486	0	0.0303922	0	0	0	0.0632358	0.0939671	0	0.0226992	0.478444	0	0	0	0.0933797	0	0.0129472	0.06	0.212924	1.01326
CGGA_1113	Pattern B	0.0588289	0	0	0	0	0.244206	0	0.0123107	0.0255707	0	0.108928	0.014908	0.0375992	0.062624	0	0.435025	0	0	0	0	0	0	0.44	0.0417931	1.09096
CGGA_1118	Pattern B	0	0.0457684	0.0240403	0.0549882	0	0.00317333	0	0.0221776	0	0	0	0.0551269	0.202158	0	0.0287039	0.480929	0	0	0.0749888	0.00794516	0	0	0.05	0.228286	1.00717
CGGA_1119	Pattern B	0.00694854	0	0.0498864	0.0742637	0.0545651	0	0	0	0	0	0.0416575	0.0308765	0.0616966	0	0	0.277035	0.0217807	0	0	0.0455321	0	0.335758	0.08	0.172964	1.06956
CGGA_112	Pattern B	0.0668261	0	0	0.00800479	0	0.219172	0	0.0105504	0.00157592	0	0	0.117715	0.0357509	0	0.00601813	0.408439	0.0128302	0	0	0.10911	0.00400738	0	0.21	0.102507	1.06411
CGGA_1129	Pattern B	0	0.0204152	0.0312994	0.13656	0	0	0	0.0826758	0	0	0	0.093984	0.0789537	0	0.00583745	0.440814	0.0117945	0	0	0.0870745	0.00822964	0.00236222	0.16	0.130475	1.04945
CGGA_1131	Pattern B	0	0.0473967	0.0290404	0	0	0.169788	0	0.0690521	0	0	0.0443301	0.103603	0.11316	0	0	0.311002	0	0.0178829	0	0.0947449	0	0	0.67	0.00705674	1.0946
CGGA_1134	Pattern B	0	0.0564045	0.00480474	0	0	0.101054	0	0.093246	0.0387546	0	0.0636543	0	0	0.0316697	0.00831292	0.194713	0.00556579	0	0	0.365354	0.0330222	0.00344385	0.58	0.0225307	1.10448
CGGA_1135	Pattern B	0.00703784	0	0.00387859	0.0783138	0	0	0	0.0537088	0	0	0.0198298	0.0331488	0.15097	0	0.0150319	0.421251	0.0092824	0	0	0.00704893	0	0.200498	0.01	0.286633	0.994178
CGGA_1138	Pattern B	0	0.112865	0.00554422	0.0278558	0.0698466	0	0	0.0573195	0	0	0	0.0719677	0.195879	0	0	0.402843	0	0	0.0558791	0	0	0	0.65	0.0125906	1.09258
CGGA_1142	Pattern B	0	0.00801915	0	0	0	0.08618	0	0.0312479	0.0817076	0	0	0.0388672	0	0	0.000201606	0.555719	0	0.00952349	0.188534	0	0	0	0.34	0.0537107	1.08322
CGGA_1146	Pattern B	0	0.0188996	0	0	0.0525029	0.0237734	0	0.00463665	0	0	0	0.0254249	0.314702	0	0.00494475	0.362577	0	0	0.192539	0	0	0	0.02	0.271928	0.9852
CGGA_1154	Pattern B	0.0498452	0	0	0	0	0.0625243	0	0	0	0	0.0293149	0	0.240919	0	0.00295013	0.246914	0.0913063	0	0.0821736	0.026988	0	0.167065	0	0.335445	0.958292
CGGA_1170	Pattern B	0	0.0246226	0.0248199	0	0.00347637	0	0	0.0616231	0	0	0	0.0510259	0.0617505	0.119794	0.00445902	0.439408	0	0	0	0.161488	0	0.0475325	0.06	0.203318	1.03263
CGGA_1175	Pattern B	0.00781974	0	0.00430226	0.0450076	0	0.069731	0	0.00841033	0.0699481	0	0.053983	0	0.00614395	0.260708	0	0.402536	0	0.0159754	0.0033367	0.0476177	0	0.00448	0.21	0.100909	1.08948
CGGA_1178	Pattern B	0.0636352	0	0	0.0325478	0	0.0703527	0	0.0257717	0	0	0	0.0435858	0.195832	0	0	0.383399	0.0168293	0	0	0.154643	0	0.0134042	0.3	0.0625583	1.08203
CGGA_1180	Pattern B	0.0192976	0.0114835	0	0.0512961	0	0.0324984	0	0.0232616	0.0586116	0	0.102114	0	0.0121171	0.153008	0	0.39169	0	0	0.11928	0	0.0188954	0.00644619	0.21	0.0987539	1.06011
CGGA_1183	Pattern B	0.00051227	0.0143291	0.00377513	0.00122295	0	0.077962	0	0.0216337	0.0492474	0	0.066625	0.0190173	0.00981508	0	0	0.579072	0	0.0145034	0.132764	0	0	0.00952119	0.2	0.108406	1.06311
CGGA_1189	Pattern B	0	0.0381995	0.0206344	0.0773754	0.129962	0	0	0	0	0	0.0720862	0.0899411	0.16194	0	0.0240163	0.169125	0.129809	0	0	0.0504831	0.0231452	0.0132834	0.81	-0.0135789	1.09589
CGGA_1190	Pattern B	0	0.0717184	0	0	0.192162	0	0	0.180188	0	0	0	0.152477	0	0	0	0.316185	0	0	0	0.0481832	0.0117822	0.0273042	0.9	-0.0245848	1.12526
CGGA_120	Pattern B	0.069353	0	0	0.0620472	0	0.188774	0	0	0.0887034	0	0.132268	0.0124337	0.0498507	0	0.0240648	0.302157	0.00226309	0	0.0680846	0	0	0	0.41	0.0481869	1.07396
CGGA_1204	Pattern B	0	0.0232371	0.00633979	0	0.149743	0	0	0	0	0	0	0.106461	0.0112465	0	0.00700163	0.145044	0.0516047	0	0	0.499322	0	0	0.16	0.129659	1.10582
CGGA_1208	Pattern B	0	0	0.00986132	0.0386767	0	0.0677329	0	0	0.0103057	0	0.0756706	0	0.0729421	0.211541	0.0123861	0.278537	0	0	0	0.0963927	0.00091513	0.125039	0.21	0.103817	1.08043
CGGA_1212	Pattern B	0	0.0301653	0.0143701	0.0378495	0.0222139	0.0344337	0	0.00709625	0	0	0.0477849	0.0253181	0.0707255	0	0.0142227	0.477859	0.0377168	0	0	0.158988	0.0165063	0.00475009	0.19	0.112928	1.0628
CGGA_1214	Pattern B	0	0.0108933	0	0.0166926	0	0.0182244	0	0.0602359	0.00986226	0	0.012623	0.0339146	0.0115193	0.184309	0.0553949	0.489577	0	0	0.0835083	0.0132449	0	0	0.16	0.125543	1.07414
CGGA_1223	Pattern B	0.0710877	0	0	0.105248	0	0	0	0.157378	0	0	0	0.066929	0.000108321	0	0.0875409	0.379434	0.0367245	0.0877801	0	0.00776967	0	0	0.34	0.0537088	1.08102
CGGA_1237	Pattern B	0	0.0259594	0	0	0	0.192016	0	0.00440429	0.0855564	0	0.0736991	0.00930387	0.0319531	0	0.0123586	0.507129	0	0.01369	0	0.0439311	0	0	0.5	0.0340999	1.09432
CGGA_1251	Pattern B	0.013857	0	0	0.0441816	0	0.0432823	0	0	0	0	0	0.0541405	0.0557143	0	0.0311776	0.377634	0.206196	0	0.1737	0	0	0.000117472	0.06	0.217021	1.00071
CGGA_1258	Pattern B	0.0174073	0	0	0.0346402	0	0.0427226	0	0.0274003	0.0646327	0	0.0630453	0.0405315	0.0188677	0.1414	0.00285967	0.47694	0	0	0.0642145	0	0	0.00533916	0.13	0.148018	1.05195
CGGA_1269	Pattern B	0	0.0202496	0.00305367	0.0122443	0	0.0242627	0	0.123278	0	0	0	0.0802428	0.0582078	0	0.033423	0.223474	0.0111123	0	0	0.410452	0	0	0.16	0.124584	1.08155
CGGA_1272	Pattern B	0.0748003	0	0	0	0	0.238843	0.00572669	0	0.0187839	0	0.0119881	0.011391	0.0449466	0.174003	0	0.353436	0	0.0140374	0	0.0431503	0	0.00889414	0.08	0.175793	1.03096
CGGA_1273	Pattern B	0.0088867	0	0.00282221	0	0	0.186106	0	0.0111031	0.0313859	0	0.0867579	0.0620187	0.0397535	0	0	0.526126	0.0082086	0.0103186	0.0265121	0	0	0	0.79	-0.00877479	1.12151
CGGA_1283	Pattern B	0.146231	0	0.060534	0.0140949	0	0.031418	0	0.129445	0	0	0	0.0932492	0	0.117808	0.0121372	0.363607	0.0136107	0	0.017866	0	0	0	0.62	0.0166518	1.0944
CGGA_1295	Pattern B	0	0.0230135	0.00723566	0.08899	0	0	0	0.0111343	0.0379582	0	0	0.0317793	0.0933054	0	0.0237334	0.601314	0.00858426	0	0	0.0626625	0	0.0102891	0	0.447532	0.897655
CGGA_1299	Pattern B	0	0.0113861	0.00799937	0.0124253	0	0.0666449	0	0.0338552	0.101989	0	0.101704	0	0.0349771	0.28946	0	0.292869	0	0.0223251	0.0139767	0.0103873	0	0	0.17	0.121078	1.06798
CGGA_1313	Pattern B	0.00559154	0	0.000809476	0	0.0181933	0.060229	0	0.00337953	0.022293	0	0.0382733	0	0	0.293858	0	0.424433	0	0.004158	0	0.0948748	0.00170553	0.0322012	0.16	0.127615	1.09652
CGGA_1314	Pattern B	0.0580441	0	0	0.000759596	0	0.0991226	0	0.0406261	0	0.00597235	0	0.0618512	0.166599	0	0.0748896	0.324796	0.0395108	0	0.111765	0.00922815	0	0.00683566	0.04	0.263132	0.977745
CGGA_1320	Pattern B	0	0	0.0682669	0.00946637	0	0.049612	0	0.0746079	0	0	0	0.0833554	0.0646955	0	0	0.532767	0	0	0.117229	0	0	0	0.26	0.0730313	1.07361
CGGA_1321	Pattern B	0	0	0.00188087	0.06568	0	0.0944708	0	0.0444875	0	0	0.0410495	0.058708	0.0409379	0	0.000623192	0.567903	0	0	0.0815102	0	0	0.00274898	0.22	0.0953458	1.07404
CGGA_1329	Pattern B	0	0	0.0239743	0	0.13886	0	0	0	0.0111625	0	0	0.0455075	0	0	0	0.491386	0.0696735	0	0.193311	0	0	0.0261249	0.27	0.0700313	1.06798
CGGA_1332	Pattern B	0.0525956	0	0	0	0	0.0897222	0	0	0.121826	0	0.160966	0	0.0392401	0.250767	0	0.238141	0	0.0136312	0.0331113	0	0	0	0.21	0.098796	1.06686
CGGA_1340	Pattern B	0	0.0470607	0	0.024912	0.0216147	0.0157877	0	0	0	0	0	0.067193	0.307067	0	0	0.371494	0	0	0.0314194	0.113451	0	0	0.29	0.065842	1.09277
CGGA_1342	Pattern B	0.0793353	0	0.0348072	0.0399479	0	0.0560372	0	0.00778602	0.0268553	0	0.025733	0	0.0715499	0.0694931	0.0136023	0.369348	0	0	0	0	0.058581	0.146924	0.13	0.146714	1.04662
CGGA_1343	Pattern B	0.0138047	0	0.117494	0	0.0205191	0.19115	0	0	0	0	0	0.0997851	0.0521031	0	0.0225408	0.247549	0.147193	0	0	0.0769677	0	0.0108939	0.69	0.00459966	1.08048
CGGA_1346	Pattern B	0.0237035	0	0	0.00704624	0	0.0161567	0	0.0410103	0.0133042	0	0	0.0448501	0.079223	0.212577	0.00758051	0.405558	0	0	0.0485376	0.0913594	0	0.00909298	0.13	0.146254	1.06479
CGGA_135	Pattern B	0.109165	0	0	0.0407763	0	0.180239	0	0	0.0195083	0	0.0662912	0	0.152074	0	0.00806041	0.214027	0.0270485	0	0	0.155713	0	0.0270977	0.59	0.0205202	1.07747
CGGA_1353	Pattern B	0.0108345	0	0	0	0	0.0315382	0	0.0222074	0.011098	0.0597005	0	0.0243984	0	0.0291096	0.0328234	0.697872	0	0	0.0421447	0	0	0.0382728	0.21	0.100529	1.10339
CGGA_1354	Pattern B	0.11084	0	0	0.0159208	0	0.0137988	0	0.0192074	0.0476805	0	0	0	0	0.378519	0	0.365304	0	0	0.00824603	0.0278108	0	0.0126727	0.15	0.135269	1.09811
CGGA_1370	Pattern B	0.0338979	0	0	0	0	0.268883	0	0.0395965	0.133181	0	0	0.037708	0.0102998	0.260595	0	0.189437	0	0.0264011	0	0	0	0	0.43	0.0436357	1.10133
CGGA_1375	Pattern B	0.206745	0	0.191283	0.0204321	0.0514063	0	0	0.0311792	0	0.00968624	0	0.0705661	0	0.0198396	0.00886957	0.348585	0	0	0	0.0414086	0	0	0.39	0.0496158	1.08964
CGGA_1377	Pattern B	0	0.0218206	0.013496	0.0122128	0	0.114316	0	0	0.0149138	0	0	0.0509674	0.268341	0	0.0037204	0.327591	0.00407647	0	0.00624099	0.152512	0	0.00979139	0.06	0.2022	1.01888
CGGA_1380	Pattern B	0.150634	0	0	0.0551444	0	0.114116	0	0	0.049817	0	0.0426733	0.0246775	0.154656	0	0.00557764	0.272149	0	0	0.11959	0	0	0.0109647	0.21	0.098963	1.04126
CGGA_1381	Pattern B	0.0568306	0	0.0866401	0.032451	0	0	0	0.0361591	0	0	0	0.0126021	0	0.0619383	0.0286289	0.48745	0	0	0	0.197299	0	0	0.24	0.0853918	1.08459
CGGA_1382	Pattern B	0.0514742	0	0	0	0	0.193169	0	0.030007	0.0727372	0	0	0.0110841	0.0150827	0.00706131	0.0465232	0.361126	0.0533348	0	0.1584	0	0	0	0.3	0.0607168	1.0568
CGGA_1387	Pattern B	0.0299016	0	0	0.0277168	0	0.110462	0	0	0.0358283	0	0	0.0326725	0	0.0573549	0	0.448139	0	0.0235381	0.208039	0	0.0201807	0.00616721	0.37	0.0519803	1.07122
CGGA_1393	Pattern B	0	0.0291494	0.00816081	0.0548529	0	0.140218	0	0.014213	0.0761163	0	0.1391	0	0.0583279	0.0765694	0.0139037	0.279419	0.00931021	0	0	0.0971816	0.00347695	0	0.46	0.0391515	1.07975
CGGA_1402	Pattern B	0.0446795	0	0.00460278	0.0293349	0	0.0098188	0	0.00140622	0.00516283	0	0.000206527	0.00198334	0.0154314	0.23748	0.0297921	0.529386	0.037417	0	0.0517926	0	0	0.00150581	0	0.316385	0.990711
CGGA_1403	Pattern B	0.0595421	0	0	0.0207248	0	0.110495	0	0.000585217	0.0165099	0	0.0087314	0.0354074	0.00510616	0.260056	0	0.384941	0	0.0192556	0	0.0781058	0.000539162	0	0.22	0.093833	1.09219
CGGA_1410	Pattern B	0.0192324	0	0	0	0	0.17423	0	0	0	0	0	0.061752	0.0691123	0	0.00759436	0.405117	0.0160886	0	0.211776	0	0	0.0350976	0.2	0.107589	1.04316
CGGA_1413	Pattern B	0	0	0.0016555	0.0135919	0	0.111074	0	0.00341565	0.0156594	0	0	0.0420989	0.0310592	0	0.00357015	0.0229815	0.0211467	0.000902465	0	0.724879	0.00796504	0	0	0.591115	0.822739
CGGA_1417	Pattern B	0.016349	0	0	0.0678375	0	0.176038	0	0	0.0479262	0	0.059798	0	0.0253526	0	0.0289118	0.303651	0	0	0.102494	0	0.00765882	0.163983	0.5	0.0341684	1.08165
CGGA_1419	Pattern B	0.0251649	0	0	0	0	0.211835	0	0	0.082134	0	0.144274	0.000315925	0.0568873	0.00768975	0	0.435263	0	0.00806154	0.0213294	0	0	0.00704568	0.29	0.0662412	1.07665
CGGA_1425	Pattern B	0.0716246	0	0.00488752	0.0725462	0	0.0302683	0	0.0764988	0.00114615	0	0.0805655	0.0208389	0.00965002	0.0777926	0	0.470526	0	0.0240178	0.0596381	0	0	0	0.66	0.0104762	1.10009
CGGA_1426	Pattern B	0.0401037	0	0	0.018667	0	0.10952	0	0.00409567	0.0330791	0	0	0.0593065	0.00345199	0.313123	0	0.375652	0	0	0	0.0430005	0	0	0	0.423826	0.91722
CGGA_1429	Pattern B	0.087859	0	0	0.0354422	0	0.121553	0	0.0162537	0.0671628	0	0	0.0237071	0.0294933	0	0	0.562803	0.00187526	0.020034	0	0.033817	0	0	0.19	0.112232	1.06504
CGGA_1430	Pattern B	0.280311	0	0	0.061859	0.027066	0	0	0.123599	0	0	0	0.0780119	0	0.0220923	0.00234362	0.361703	0	0	0	0.0399145	0	0.00309883	0.74	0.001389	1.10933
CGGA_1433	Pattern B	0.020807	0	0.00357596	0.0202659	0	0.0663227	0	0.0174312	0	0	0.00653389	0.00305401	0.0276871	0	0.0172838	0.398916	0	0.000256123	0	0.344083	0.00607276	0.0677108	0.43	0.0453435	1.11333
CGGA_1435	Pattern B	0.0209669	0	0.00601305	0.0908286	0	0.0745132	0	0.000557448	0	0	0.000621137	0.0392631	0.175184	0	0.00317086	0.457942	0.0186465	0	0	0.112293	0	0	0.06	0.201167	1.02187
CGGA_1444	Pattern B	0.0653554	0	0	0.0147647	0	0.126033	0	0.0137232	0.0264412	0	0.0112228	0.0630227	0.0197474	0	0.00712011	0.540546	0	0	0	0.099791	0	0.012232	0.06	0.206812	1.02103
CGGA_1457	Pattern B	0.0839596	0	0.0199516	0.304282	0	0.0152965	0	0.0812361	0.00352028	0.0116172	0	0	0.0557962	0	0.129117	0.268855	0.016197	0	0	0.0101719	0	0	0.15	0.13401	1.04853
CGGA_1458	Pattern B	0	0.141205	0.0457919	0.0873398	0	0	0	0.135065	0	0	0.0283543	0.0571148	0.0218783	0	0.0108659	0.372424	0.0271816	0	0	0.0727786	0	0	0.99	-0.0443385	1.10721
CGGA_1459	Pattern B	0	0	0.00546325	0.0409868	0	0.221671	0	0	0.0637339	0	0.0828076	0.019771	0.0386939	0	0.0822015	0.303737	0	0	0.13063	0	0	0.0103041	0.57	0.0237421	1.07795
CGGA_1460	Pattern B	0	0.0236589	0.0147534	0.0260888	0	0.0761822	0	0.0372271	0.0611803	0	0.00290347	0.0351675	0.0128549	0.0769945	0	0.421757	0	0.0264137	0.184818	0	0	0	0.22	0.0950001	1.05156
CGGA_1461	Pattern B	0	0.0262777	0.00516591	0	0	0.0311037	0	0.0298241	0.0350192	0	0.00606111	0.000970323	0	0.511844	0.0157404	0.316299	0	0	0	0.0216946	0	0	0.05	0.249334	1.06372
CGGA_1462	Pattern B	0.12563	0	0	0	0	0.0865741	0	0.00271814	0.0369483	0	0.064711	0.00584888	0.0141811	0.0918754	0.00355075	0.506503	0	0.00284539	0	0.0304088	0.00999767	0.0182081	0.3	0.0626258	1.09026
CGGA_1473	Pattern B	0.132217	0	0	0	0.0888081	0.238288	0	0	0.0328219	0	0.0846525	0.0725335	0	0	0	0.130408	0.0171637	0.00752598	0	0	0	0.195581	0.31	0.0575582	1.098
CGGA_1475	Pattern B	0.0300542	0	0.0265603	0.0387732	0	0.00496234	0	0.00885007	0.00165178	0	0	0.0373033	0.0706774	0	0.00757629	0.314373	0.0869415	0	0	0.360943	0.00956996	0.00176377	0.08	0.177799	1.04521
CGGA_1478	Pattern B	0	0.0408754	0.0133209	0	0	0.0996396	0	0.0074404	0.0706278	0	0.0503253	0	0	0.0152014	0	0.51653	0	0.0276218	0.148575	0	0	0.00984282	0.4	0.0490254	1.07689
CGGA_1488	Pattern B	0.0159261	0	0	0	0	0.208137	0	0	0.0345168	0	0.0553215	0.00922726	0.161002	0	0	0.215886	0.00740649	0.00350314	0.246935	0	0	0.0421393	0.18	0.117185	1.02985
CGGA_1491	Pattern B	0	0.0300431	0.00459582	0.0438207	0	0.101157	0	0.00873265	0.0390241	0	0	0.0473756	0	0.0654758	0	0.409618	0	0.0107847	0.225096	0	0	0.014277	0.23	0.0914245	1.05092
CGGA_1492	Pattern B	0	0	0.00697205	0.0307279	0	0.180169	0	0.0265929	0	0	0	0.116883	0.00766345	0.0188368	0.00292271	0.207384	0	0.000624331	0	0.27972	0.000243415	0.12126	0.41	0.0481639	1.10829
CGGA_1496	Pattern B	0.0820905	0	0	0.02848	0	0.104277	0	0.0310247	0.0267121	0	0.0974501	0	0.0253602	0	0	0.490546	0.0429431	0.00524836	0	0.0111865	0.0339977	0.0206832	0.11	0.157516	1.03468
CGGA_1497	Pattern B	0	0.157223	0	0	0.069548	0.0363309	0	0	0	0	0	0.0650525	0.21918	0	0	0.303881	0	0	0.148784	0	0	0	0.88	-0.0218919	1.09306
CGGA_1505	Pattern B	0	0.00281174	0.00188928	0	0	0.0976925	0	0.0202454	0.0223436	0	0	0.0728986	0.0921003	0	0	0.546129	0.000577173	0	0	0.107335	0	0.0359767	0.15	0.13605	1.06449
CGGA_1510	Pattern B	0.020042	0	0.000165654	0	0.0615283	0.10642	0	0	0.110831	0	0.0513506	0.00493768	0.0096482	0.103516	0	0.508272	0	0.0100637	0	0	0	0.0132249	0.23	0.0901717	1.0816
CGGA_1521	Pattern B	0.00402256	0.00219109	0.0025564	0.027891	0	0.0369843	0	0.00857267	0.030132	0	0.054028	0	0	0.291025	0	0.475921	0	0	0.055199	0	0	0.0114766	0.18	0.115034	1.10229
CGGA_1526	Pattern B	0.0165689	0.00472804	0	0.00621548	0	0.144376	0	0	0.0152982	0	0.0191872	0.0396493	0.0395504	0.0392494	0.00677726	0.341325	0.0294431	0.00148809	0.256388	0	0.00528091	0.0344749	0.07	0.181618	1.00795
CGGA_1529	Pattern B	0.030198	0	0	0.0635292	0	0.0753184	0	0.027584	0.0581419	0	0.136042	0	0.0184528	0	0	0.518147	0	0.00803778	0.0506843	0	0	0.0138639	0.43	0.0430352	1.09065
CGGA_1536	Pattern B	0.0485182	0	0	0.00182122	0.000432179	0.0814745	0	0	0	0	0.0156392	0.0092739	0.164617	0	0	0.488875	0	0.00139144	0.130447	0	0	0.0575109	0	0.378319	0.932597
CGGA_1538	Pattern B	0	0.0593293	0.024721	0.085504	0	0.103896	0	0.0216209	0.0739238	0	0.0700932	0	0.021651	0	0.0487856	0.397995	0	0	0	0.0755379	0	0.0169425	0.59	0.021151	1.08315
CGGA_1539	Pattern B	0.0366569	0	0	0.00699248	0	0.117567	0	0	0.0931312	0	0.0856865	0	0.0357384	0	0.0112705	0.233905	0.0369321	0	0	0.318944	0.0169774	0.00619822	0.17	0.118779	1.05392
CGGA_1554	Pattern B	0.0105109	0	0.0207774	0.0443457	0	0	0	0.0801577	0	0	0.0103926	0.0585156	0.0723351	0	0.00856769	0.413115	0	0	0	0.278327	0	0.00295495	0.25	0.0784599	1.08874
CGGA_1558	Pattern B	0.0428971	0	0.0659833	0.092141	0	0.0980108	0	0.0501523	0.0309339	0	0	0.0230409	0.0344	0	0.0939038	0.415899	0.0147354	0	0	0.0280106	0	0.00989146	0.08	0.169494	1.02415
CGGA_1560	Pattern B	0.176297	0	0.122031	0.0455919	0	0.0686626	0	0.0511163	0	0	0	0.0639257	0.0117883	0	0.0141776	0.40027	0	0	0.0200879	0	0	0.0260519	0.18	0.114878	1.04909
CGGA_1564	Pattern B	0	0.0282177	0.00510574	0.00691409	0	0.101699	0	0.00996308	0.0545086	0	0.014564	0.0290342	0.000414401	0.11786	0	0.451338	0	0.0197841	0.159545	0	0	0.00105179	0.17	0.118016	1.05245
CGGA_1575	Pattern B	0.010552	0	0	0.0220795	0	0.0466551	0	0.0178289	0	0	0	0.0353907	0.181362	0	0.0214478	0.380605	0	0	0	0.284079	0	0	0.06	0.220045	1.02267
CGGA_1586	Pattern B	0.0604531	0	0	0.0317881	0	0.111584	0	0.0229128	0.0179722	0	0.108099	0	0.149964	0.00356262	0.00371502	0.19887	0.00349093	0.000920643	0	0.262964	0.00320433	0.0205003	0.44	0.0421141	1.08191
CGGA_1587	Pattern B	0.0236971	0	0.00166932	0.0757429	0	0.0291646	0	0.00577708	0	0	0	0.0802934	0.230249	0	0.0177151	0.397673	0	0	0.12672	0	0.0112992	0	0.01	0.280993	0.97703
CGGA_1591	Pattern B	0.0758022	0	0	0	0.00358855	0.159632	0	0	0	0	0	0.045542	0.00133805	0	0.0110517	0.536159	0.0461315	0	0	0.100016	0	0.0207403	0.29	0.066332	1.08687
CGGA_1592	Pattern B	0.0415865	0	0.0386426	0	0	0.141803	0	0.0591673	0	0	0	0.0353179	0	0	0.0990608	0.222685	0.0399574	0	0	0.208332	0	0.113447	0.25	0.0778433	1.06599
CGGA_1598	Pattern B	0.011308	0.031374	0	0.0413087	0	0	0	0.0469125	0	0	0	0.0271475	0.0355374	0	0.00382022	0.691478	0	0	0.111113	0	0	0	0.01	0.289713	0.992319
CGGA_1601	Pattern B	0.033027	0	0.0101027	0.00679903	0	0.00855261	0.00133479	0.0148622	0.0100132	0	0.0245187	0	0.0120752	0.233906	0.0389168	0.517619	0	0	0.0448858	0	0	0.0433871	0.02	0.274103	1.01292
CGGA_1604	Pattern B	0.105747	0	0.00347379	0	0	0.114735	0	0.00958225	0.0620151	0	0.0574861	0	0	0.193866	0.0308583	0.250238	0	0	0	0.0625227	0	0.109476	0	0.500341	0.86523
CGGA_1606	Pattern B	0.157896	0	0	0.038785	0	0.186075	0	0.0166678	0.0342346	0	0	0.0906594	0.0239713	0	0.0140257	0.362727	0.0130607	0	0.0618969	0	0	0	0.3	0.0640942	1.06752
CGGA_1612	Pattern B	0.144633	0	0	0.03858	0	0.106229	0	0.0129882	0.0202368	0	0.101346	0	0.0746179	0.0325082	0.00620411	0.243804	0	0.0052753	0	0.203312	0	0.0102649	0.59	0.0199871	1.08392
CGGA_1613	Pattern B	0.0288275	0	0	0.041625	0	0.00234695	0	0.0147877	0.0385691	0	0	0.016297	0.122135	0.109549	0.0108108	0.54071	0	0	0	0.054439	0.00791479	0.0119885	0.13	0.147794	1.06969
CGGA_1624	Pattern B	0.0428742	0	0.0204414	0.0349749	0	0.112765	0	0.000759876	0.0130191	0	0.0970991	0.0154391	0.0487047	0	0	0.508603	0	0.0090881	0.0870514	0	0	0.00918094	0.2	0.111257	1.05362
CGGA_1645	Pattern B	0	0.00861065	0.00591991	0.0249309	0	0.101082	0	0	0.00345156	0	0.0132265	0.00688669	0.267144	0	0.00297929	0.399996	0	0	0.155285	0	0	0.010488	0.07	0.180234	1.02689
CGGA_1656	Pattern B	0.0270859	0	0	0	0	0.097505	0	0.0128731	0.0922761	0	0.0556614	0	0.00115308	0.0149676	0	0.416037	0	0.0317371	0.240229	0	0.00208689	0.00838838	0.43	0.0435625	1.06431
CGGA_1659	Pattern B	0.0615261	0	0	0.0875586	0	0.00492568	0	0.0456632	0	0	0	0.0605187	0.0197754	0.0457614	0.0107182	0.456662	0	0	0	0.173118	0.00609857	0.0276749	0.21	0.0980371	1.07369
CGGA_1669	Pattern B	0.0706107	0	0	0	0	0.0936934	0	0.0633027	0	0	0	0.0581706	0.0882353	0	0.05871	0.448226	0.00943215	0	0.101757	0	0	0.00786134	0.34	0.0533051	1.07251
CGGA_1671	Pattern B	0	0.0526492	0.00296387	0.0120234	0	0.0548701	0	0.0632273	0	0	0	0.0633746	0.246658	0	0.0248023	0.337682	0	0	0.141749	0	0	0	0.08	0.174563	1.01884
CGGA_1675	Pattern B	0.0687686	0	0.0409812	0.0737868	0	0.0474187	0	0.0414835	0.0164275	0	0	0.0397537	0.117999	0	0.0228284	0.269904	0.0515608	0	0	0.183407	0.0256809	0	0.02	0.278672	0.971023
CGGA_1682	Pattern B	0.00896412	0	0.00254838	0.0194685	0	0.0282528	0	0	0	0	0	0.0283456	0.16369	0	0.0192908	0.539696	0.00255227	0	0.0518396	0.0827198	0.0272881	0.0253434	0.19	0.112258	1.07954
CGGA_1685	Pattern B	0	0.0523004	0.000383223	0	0.024281	0.0944774	0.0145617	0	0	0	0	0.00922639	0.222514	0	0.0245929	0.435332	0	0	0.117773	0	0	0.00455835	0.28	0.0694286	1.07492
CGGA_1687	Pattern B	0.111478	0	0.0375667	0.0290967	0	0.104851	0	0.0199866	0.0951882	0	0.0324015	0.0356775	0.0247828	0	0.015112	0.425763	0.0234565	0.00311853	0.0192848	0.0161095	0	0.00612727	0.56	0.0265456	1.08205
CGGA_1690	Pattern B	0.036308	0	0	0.0090484	0	0.0707662	0	0.0222181	0.0190524	0	0.044115	0.0180362	0.0066934	0.166219	0.00408218	0.37768	0	0	0	0.209641	0.00357914	0.0125608	0.06	0.220786	1.02158
CGGA_1694	Pattern B	0	0.0380374	0.0324302	0.0527172	0	0.057244	0	0.00297047	0.0741107	0	0.0622919	0.0112827	0.0821841	0	0.00162203	0.460629	0	0	0.116646	0	0	0.0078337	0.33	0.0550855	1.06871
CGGA_1698	Pattern B	0	0.0215023	0.00275727	0.0383214	0	0.0185629	0	0.00824377	0.0526794	0	0.0708538	0.00888085	0.0285204	0.190146	0.00678941	0.411223	0	0.000556719	0	0.125674	0.00716005	0.00812863	0.15	0.137878	1.06433
CGGA_1702	Pattern B	0.0739846	0	0	0.00480464	0	0.233047	0	0.0115659	0.0726482	0	0.0515378	0.0294382	0.0171566	0.162569	0	0.294839	0	0.00987446	0.0385347	0	0	0	0.57	0.0240696	1.09069
CGGA_1708	Pattern B	0.0101518	0	0.0249255	0.23789	0	0.0750364	0	0.128828	0.0382069	0	0	0.0165643	0	0	0.0142022	0.361524	0.014074	0	0	0.0654984	0	0.0130982	0.63	0.0151201	1.10049
CGGA_1709	Pattern B	0.0488698	0	0	0.00708713	0	0.169878	0	0.0153484	0	0	0	0.0544795	0.109701	0	0.0488225	0.43824	0	0	0.0122599	0.0768749	0	0.0184389	0.22	0.093367	1.06323
CGGA_1713	Pattern B	0.0470972	0	0	0.0282201	0	0.028663	0	0.0765781	0.0126599	0	0.0345233	0.0589825	0.00328866	0.313556	0	0.224332	0	0.00333709	0	0.168762	0	0	0	0.531321	0.846756
CGGA_1715	Pattern B	0.109258	0	0	0.107628	0	0.12901	0	0	0.0643948	0	0.0790063	0.0226631	0.0355666	0	0.00536145	0.377904	0	0	0.0692075	0	0	0	0.34	0.0532573	1.07123
CGGA_1716	Pattern B	0.0482526	0	0	0.11802	0	0.135297	0	0.00357113	0.0265926	0	0.102004	0	0.138956	0	0.0253819	0.297741	0.00636628	0	0.0843537	0	8.05753e-06	0.0134554	0.27	0.070035	1.05856
CGGA_1720	Pattern B	0	0	0.00473282	0	0.0239674	0.0878375	0	0.0105325	0.00080286	0	0	0.0510029	0.0347908	0	0.0132067	0.238472	0.0219348	0	0	0.500599	0	0.0121207	0.21	0.0992258	1.11615
CGGA_1725	Pattern B	0	0.068116	0.000529552	0.00505713	0.0127594	0	0	0.130953	0	0	0	0.0810831	0	0	0.0236279	0.524123	0.0237742	0	0	0.129976	0	0	0.25	0.0791702	1.08296
CGGA_1728	Pattern B	0.0635976	0	0	0.0305045	0	0.131551	0	0.0354353	0	0	0	0.028602	0.296367	0	0.0392654	0.310488	0	0	0	0.0641902	0	0	0.17	0.121207	1.05114
CGGA_1735	Pattern B	0.0849471	0	0	0.0649344	0	0.156866	0	0	0.0153577	0	0	0.0419321	0.334032	0	0.0570896	0.132061	0	0	0.11278	0	0	0	0.78	-0.00580064	1.09316
CGGA_1738	Pattern B	0	0.0754033	0.0191412	0.0566771	0	0.0673087	0	0	0.0549859	0	0	0.0435495	0.0069561	0	0.00811452	0.410509	0	0.00184109	0.214321	0	0.0314922	0.00970043	0.14	0.141296	1.02369
CGGA_1749	Pattern B	0.0268865	0.00320738	0	0	0	0.0696087	0	0	0.0612093	0	0.0355639	0	0	0.40467	0.00508106	0.328727	0	0	0	0.0620809	0	0.00296552	0	0.326981	0.987561
CGGA_1758	Pattern B	0.0682989	0	0	0.109292	0.0277383	0	0	0.125885	0	0	0.0440563	0.0186516	0	0.107269	0.00592024	0.397309	0	0.00150607	0.0350807	0.0316799	0	0.0273123	0.43	0.0444083	1.08291
CGGA_1770	Pattern B	0.0732886	0	0.0639333	0	0	0.0682352	0	0.0166123	0	0.00708363	0	0.0897153	0.230229	0	0.0154911	0.371503	0	0	0	0.0639088	0	0	0.2	0.106098	1.05916
CGGA_1771	Pattern B	0.0824783	0	0	0	0	0.264557	0	0.069786	0.0585038	0	0.118873	0.0201787	0.0311671	0	0	0.33215	0	0.00470944	0	0	0	0.0175961	0.86	-0.0199172	1.11401
CGGA_1773	Pattern B	0	0.0474993	0.0188419	0	0	0.0829655	0	0.0232809	0.0268473	0.0103328	0	0.0530599	0.00104586	0.0157682	0.0594212	0.471566	0	0.000356752	0.176459	0	0	0.0125555	0.19	0.111824	1.04613
CGGA_1785	Pattern B	0.00522064	0	0.00757588	0.0176739	0	0.283418	0	0.0124007	0.0488379	0	0	0.071319	0.0286634	0.0959479	0	0.361451	0	0.0133159	0.0432325	0	0	0.0109434	0.17	0.123047	1.05145
CGGA_1807	Pattern B	0.0454092	0	0	0.00127728	0	0.127873	0	0.0221515	0.0743493	0	0.0691395	0	0.0031674	0.300189	0	0.297322	0	0.0255723	0	0.0335495	0	0	0.17	0.12205	1.07029
CGGA_1812	Pattern B	0	0.021918	0.0053784	0.011676	0	0.109477	0	0.0219492	0.0468889	0	0.0869382	0	0.0161759	0.209227	0	0.269296	0	0.0100956	0	0.185599	0.00209677	0.00328508	0.17	0.119759	1.06161
CGGA_1814	Pattern B	0.0641845	0	0.0218184	0.0533453	0	0.0789962	0	0.0338834	0	0	0	0.00692623	0.0637502	0.0120517	0.0333271	0.376441	0	0	0	0.242001	0.00525434	0.00802046	0.53	0.0311261	1.09119
CGGA_1815	Pattern B	0.119268	0	0	0	0	0.117663	0	0.0192749	0.011108	0.070162	0	0.0903912	0	0.0286914	0.0732744	0.398754	0	0	0.0630528	0	0	0.0083594	0.35	0.0522675	1.0781
CGGA_1819	Pattern B	0	0.00152666	0.00804171	0.0213771	0	0.0754895	0	0.0325753	0.0440833	0	0.00586801	0.0417229	0.0157873	0.112775	0	0.538558	0	0.0323699	0.0334344	0.0157385	0.0143635	0.00628934	0.12	0.152921	1.05555
CGGA_1820	Pattern B	0.00261325	0	0.00128834	0.0641704	0	0.00242201	0	0.0481311	0	0.0221794	0	0.0695566	0.0560775	0	0.0236169	0.602767	0	0	0	0.107178	0	0	0.45	0.0406937	1.11868
CGGA_1826	Pattern B	0	0	0	0	0	0.0609829	0	0.0536335	0	0	0	0.0774733	0.107783	0	0.0949614	0.242982	0.0782917	0	0	0.283892	0	0	0.07	0.187472	1.03368
CGGA_1833	Pattern B	0.0294397	0	0	0	0	0.0937666	0	0.0536638	0.0800531	0.00373888	0	0.0354622	0.00375391	0.106834	0.0330249	0.294955	0	0.0212864	0	0.241874	0.00151992	0.000627181	0.21	0.0982964	1.06778
CGGA_1862	Pattern B	0.0817883	0	0	0.0522826	0	0.285778	0	0	0.0795469	0	0.0704684	0.0338196	0.048548	0	0.0166478	0.193098	0	0.0105953	0.115128	0	0.00375633	0.00854178	0.66	0.00913416	1.08787
CGGA_1866	Pattern B	0.031623	0	0	0	0	0.125202	0	0.029237	0.0645006	0	0.074994	0.0294604	0.0344673	0.152055	0.0019047	0.207281	0	0	0	0.245814	0.00346131	0	0.21	0.101058	1.06752
CGGA_1908	Pattern B	0.00870285	0	0	0.0748129	0	0.204962	0	0	0.0506083	0	0.0723919	0.0296777	0.0460379	0	0	0.465932	0	0.00879571	0.0380783	0	0	0	0.34	0.0532785	1.08533
CGGA_1911	Pattern B	0.000539094	0	0.00903743	0.115521	0	0.000558219	0.00103547	0.112568	0.0729645	0	0	0.0757899	0.00201862	0.0351222	0.110019	0.24636	0.104759	0	0.113496	0	0.000210439	0	0.07	0.183106	1.01344
CGGA_1946	Pattern B	0	0.00555815	0.00379621	0	0.00850218	0.107682	0	0.0421371	0.0131616	0.0370179	0.0307019	0	0	0.358921	0.0128019	0.27759	0	0.00119182	0	0.0891275	0	0.011811	0.17	0.123205	1.08684
CGGA_2006	Pattern B	0.0581436	0	0.00644692	0.0638968	0	0.119494	0	0.0159103	0.0345619	0	0.0183181	0.0198207	0.0364691	0	0.0336987	0.469066	0.0371715	0	0.0811899	0	0	0.00581291	0.05	0.247561	0.988468
CGGA_2062	Pattern B	0	0.0329476	0	0.0403018	0	0.125544	0	0	0.014963	0	0.0633493	0.00451041	0.0306303	0	0.00137904	0.550175	0.0122845	0.00573356	0.0985997	0	0.0156032	0.00397894	0.21	0.0982302	1.06452
CGGA_2078	Pattern B	0.0727234	0	0.0158696	0.0795646	0	0.0545211	0	0	0.00713603	0	0	0.0164272	0.211838	0	0.0136889	0.370092	0.0520477	0	0.106091	0	0	0	0.29	0.0669189	1.06539
CGGA_236	Pattern B	0	0.0595359	0.0179033	0	0	0.0788576	0	0.00814644	0.0818011	0	0.0759706	0.011934	0.0219143	0.239208	0.00905691	0.366848	0	0	0	0.0288238	0	0	0.54	0.0290904	1.1091
CGGA_247	Pattern B	0	0.020744	0.0300532	0	0	0.272517	0	0	0.00924319	0	0.0358229	0.117522	0.057985	0	7.72871e-05	0.345924	0	0	0	0.0913738	0.018738	0	0.56	0.0263679	1.09597
CGGA_272	Pattern B	0.157481	0	0	0.0282247	0	0.0388508	0	0.0104071	0.0142008	0.00592427	0	0.0254842	0.101214	0	0.011973	0.428314	0.0534879	0	0	0.0708064	0	0.0536325	0.28	0.0684496	1.07714
CGGA_274	Pattern B	0.0642575	0	0.0432602	0	0	0.00657515	0	0.0486461	0	0.00778465	0	0.0512117	0	0.0998041	0.00601061	0.343091	0	0	0	0.28234	0	0.0470191	0.05	0.233323	1.01473
CGGA_374	Pattern B	0.0362978	0	0.0701779	0.00977911	0	0.179091	0	0.0171738	0	0	0.00540444	0.0639411	0.0418764	0	0	0.508386	0.0678726	0	0	0	0	0	0.29	0.0675256	1.0782
CGGA_406	Pattern B	0.161107	0	0	0	0	0.448074	0	0	0	0.00167282	0	0.09107	0	0.0902505	0	0.179977	0.0129109	0.0149384	0	0	0	0	0.67	0.00706625	1.11471
CGGA_420	Pattern B	0.0683663	0	0	0.0683285	0	0.063225	0	0.014151	0.0329027	0	0.0129199	0.0295192	0.0356384	0	0	0.575337	0.0859823	0	0	0.0136293	0	0	0.79	-0.00872677	1.12717
CGGA_457	Pattern B	0.0557551	0	0.0247643	0.0085628	0	0.295654	0	0.00361849	0.0754756	0	0.0895218	0	0.0472995	0	0	0.286098	0.023147	0.0376101	0	0	0.0524935	0	0.96	-0.031595	1.10273
CGGA_483	Pattern B	0.0108529	0	0	0.161532	0	0.0165238	0	0.0685538	0.0539857	0	0	0	0.045832	0.144955	0.106746	0.313405	0	0	0	0.0684496	0	0.00916373	0	0.315578	0.963041
CGGA_487	Pattern B	0.0501015	0	0	0.0282909	0	0.0182853	0	0.0224851	0.0159989	0	0	0.0344919	0.0117658	0.105826	0.00160019	0.521482	0	0	0	0.171226	0	0.0184466	0.08	0.174328	1.05429
CGGA_488	Pattern B	0.0983972	0	0	0.121469	0	0	0	0.124083	0	0	0	0.0599579	0.141919	0	0.070015	0.226411	0	0.0178069	0.0115629	0.0803096	0	0.0480683	0.76	-0.000178664	1.08983
CGGA_492	Pattern B	0.109115	0	0.00999565	0.0595892	0	0.0444247	0	0.0457456	0	0	0	0.023637	0.0823483	0	0.022593	0.519741	0.0611673	0	0.00851077	0.0100378	0	0.00309508	0	0.367542	0.937014
CGGA_499	Pattern B	0	4.66858e-05	0.0036415	0	0	0.144779	0	0	0.0923051	0	0.104261	0	0	0.307761	0	0.309545	0	0	0.0376617	0	0	0	0.17	0.122633	1.0739
CGGA_509	Pattern B	0	0.111761	0.0410626	0	0.146602	0.000296611	0	0.088815	0	0	0.0416755	0	0.0432805	0.0233504	0	0.383398	0.0361216	0.00108881	0	0.069546	0	0.0130019	0.65	0.0129972	1.08297
CGGA_521	Pattern B	0.0568106	0	0	0.001251	0	0.128356	0	0	0	0	0.0252659	0.018591	0.240773	0	0.0120123	0.402661	0	0.00419301	0.0975738	0	0	0.012512	0.13	0.144511	1.04022
CGGA_530	Pattern B	0	0.0310479	0.0134439	0.0277144	0	0.223403	0	0	0.0201264	0	0.0954869	0.00836395	0.105307	0.00127216	0.00272229	0.387269	0	0.00264547	0	0.0545806	0	0.0266175	0.34	0.0530341	1.07531
CGGA_545	Pattern B	0.0348493	0	0.00752063	0.0369844	0	0.048592	0	0.00869417	0	0	0	0.0389683	0.273735	0	0.0340684	0.407781	0.0150706	0	0.0688174	0.0215171	0	0.00340132	0.01	0.289773	0.9773
CGGA_604	Pattern B	0.0112062	0	0	0	0	0.0366455	0	0.0128022	0	0	0	0.0462123	0.0791856	0.0325636	0.001897	0.466212	0	0	0	0.228776	0.0147514	0.0697483	0	0.456542	0.894067
CGGA_624	Pattern B	0.0558811	0	0	0.0907781	0	0.000595376	0	0.0168882	0.0426739	0	0.107007	0	0.0615501	0.0634673	0.00573348	0.406391	0	0.00465872	0	0.079212	0	0.0651641	0.24	0.0874893	1.06861
CGGA_633	Pattern B	0.172657	0	0	0.102608	0.195244	0	0	0.133285	0	0	0	0.105659	0.00205903	0	0	0.20471	0	0	0	0.0837789	0	0	0.98	-0.0404473	1.13691
CGGA_642	Pattern B	0	0.0277102	0.0178426	0	0	0.113414	0	0	0.0147828	0	0.032718	0.0244702	0.130346	0	0.00216276	0.207449	0.0580019	0	0	0.361326	0.000940628	0.00883714	0.06	0.193698	1.02731
CGGA_643	Pattern B	0.113985	0	0	0.0053237	0.106233	0	0	0.0249262	0	0	0	0.0995565	0.019773	0	0.0259462	0.560263	0	0	0.043993	0	0	0	0.62	0.016537	1.1091
CGGA_652	Pattern B	0.0421369	0	0.00209486	0.0179281	0	0.155045	0	0	0.0305778	0	0.0125025	0.0259102	0.198877	0	0.0092112	0.422617	0.0589495	0.00232394	0.00861408	0	0	0.0132128	0.09	0.167101	1.0333
CGGA_655	Pattern B	0.0154869	0	0	0.0357107	0	0.0624782	0	0	0	0	0.0305611	0.0465047	0.103409	0	0.0112125	0.459402	0.15662	0	0	0.0786142	0	0	0.11	0.157091	1.04423
CGGA_658	Pattern B	0.0746646	0	0	0.0341127	0	0.0303515	0	0	0	0	0	0.0356611	0.160772	0	0.0372281	0.505064	0.0717406	0	0.0354907	0	0	0.0149143	0.06	0.201225	1.0264
CGGA_676	Pattern B	0.0515716	0	0	0.00656455	0.0138092	0.0148578	0	0.0122041	0	0	0	0.0429732	0.11992	0	0.0445351	0.577947	0	0	0.0502918	0.0631636	0	0.00216278	0.04	0.262284	1.00118
CGGA_678	Pattern B	0	0.032646	0.0192479	0	0.0157184	0.0225304	0	0.0417003	0	0	0	0.0249073	0.0295312	0	0.0105744	0.20346	0.0368994	0	0	0.562785	0	0	0.21	0.0982143	1.12731
CGGA_679	Pattern B	0.0584414	0	0.0150425	0.0573384	0	0.00938147	0	0.00993566	0.00788073	0	0	0.0137487	0.119239	0	0.0285195	0.584639	0	0	0.0904486	0	0	0.0053853	0	0.313042	0.970311
CGGA_685	Pattern B	0	0.0262546	0.0135161	0.0450458	0	0.13558	0	0	0.146392	0	0.142768	0	0.096127	0	0.00409547	0.251007	0	0	0.114526	0	0.00515718	0.0195304	0.55	0.0270954	1.07499
CGGA_705	Pattern B	0.0115613	0	0.00408164	0.0394935	0	0.0493212	0	0.000936229	0	0	0.0204441	0.0208914	0.0880957	0	0.0265872	0.468881	0.0547494	0	0	0.163569	0	0.0513885	0.06	0.218637	1.01751
CGGA_707	Pattern B	0	0.054725	0.0264114	0	0.0928098	0.0921957	0	0.0294317	0.146175	0	0.192082	0.00482939	0.0604403	0	0	0.152753	0.0497914	0.0363041	0	0.0303568	0.0316946	0	0.12	0.151668	1.03152
CGGA_719	Pattern B	0.0125095	0	0.00428238	0	0	0.0664315	0	0.0443598	0	0.0342229	0	0.12932	0.00526724	0	0.00583716	0.166667	0.0170325	0	0	0.455468	0	0.0586025	0	0.389168	0.949707
CGGA_738	Pattern B	0.041304	0	0	0.0318936	0	0.0629831	0	0	0	0	0	0.0516036	0.184731	0	0.0848562	0.366758	0.0600775	0	0.0109362	0.0519429	0.0529137	0	0.05	0.224821	1.00518
CGGA_747	Pattern B	0	0	0.0271597	0	0	0.255642	0	0	0.0511884	0	0.081358	0.058235	0.0593117	0	0.00781823	0.411226	0	0	0	0.0467313	0.00132962	0	0.6	0.0182417	1.09811
CGGA_759	Pattern B	0.100411	0	0.0214332	0.0591074	0	0.0722306	0	0	0.0352659	0	0.0270936	0	0.190252	0	0.0269975	0.348539	0	0	0.087928	0	0.00324224	0.0275003	0.05	0.24292	0.987227
CGGA_766	Pattern B	0	0.00433593	0.011744	0.0226033	0.0148149	0.0765241	0	0.00262322	0	0	0.000919332	0.0873661	0.0413511	0	0	0.511032	0.0652573	0	0	0.129705	0.0277398	0.00398396	0.26	0.0727655	1.09075
CGGA_777	Pattern B	0.0399362	0	0	0.0159816	0	0.0135517	0	0.00276711	0	0	0.00157453	0.0106313	0.0694796	0	0.00779297	0.695743	0	0	0.102198	0	0	0.0403438	0.06	0.218528	1.04005
CGGA_782	Pattern B	0.0449364	0	0	0.0493091	0	0.184682	0	0.0108567	0	0	0.062781	0.0277746	0.136969	0	0	0.417166	0	0.005923	0	0.0370327	0	0.022569	0.21	0.0966314	1.06143
CGGA_791	Pattern B	0.0402565	0	0	0.0763487	0	0.111692	0	0	0	0	0	0.0430321	0.0340666	0	0.0852127	0.451281	0.0780682	0	0.0725604	0	0	0.00748181	0.22	0.0959793	1.05972
CGGA_809	Pattern B	0	0.0268085	0.000825331	0	0	0.147938	0	0	0.075391	0	0.0729183	0	0.220108	0	0.00136101	0.276635	0	0	0.154631	0	0	0.0233832	0.06	0.212731	0.997942
CGGA_831	Pattern B	0.0840011	0	0.0547315	0.015556	0	0.0206626	0	0.0315217	0.0317279	0	0	0.0081948	0	0.284578	0.0136034	0.364957	0	0	0	0.0576059	0	0.0328605	0.07	0.179498	1.04984
CGGA_834	Pattern B	0.040309	0	0	0.0327759	0	0.191958	0	0	0.0307711	0	0	0.0479351	0.0397167	0	0	0.483831	0	0.012517	0.110647	0	0	0.00953916	0.43	0.0433869	1.07988
CGGA_837	Pattern B	0.0756258	0	0	0.0253302	0	0.0969221	0	0	0.0669391	0	0.161413	0	0.0727358	0	0	0.088094	0.0392456	0.00727289	0.0909226	0	0	0.275498	0.28	0.0697075	1.09487
CGGA_848	Pattern B	0.00224249	0	0.00111899	0.0059003	0	0.0356753	0	0.0243279	0.00177057	0.0183247	0	0.0373563	0	0.185774	0.000559693	0.628107	0	0.00892944	0	0.0244364	0.0103152	0.0151615	0.05	0.243125	1.04153
CGGA_850	Pattern B	0	0.0258414	0.00700396	0	0	0.0646932	0	0	0.0431783	0.0237053	0	0.0300894	0	0.0444243	0.00803571	0.596214	0	0.0243953	0.0978102	0	0	0.0346096	0.09	0.16207	1.0484
CGGA_867	Pattern B	0.0476174	0	0.0349432	0.0308583	0	0.0138591	0	0.0116439	0	0	0	0.0365088	0.173183	0	0.0064529	0.511617	0.0324293	0	0.098177	0	0	0.00271008	0	0.395649	0.923697
CGGA_878	Pattern B	0	0.0144903	0	0	0	0.0789444	0	0.0329055	0.0532405	0.0570767	0	0.0971192	0	0	0.0570601	0.432099	0	0.0200543	0.15701	0	0	0	0.13	0.145282	1.03498
CGGA_881	Pattern B	0.0506007	0	0	0.0560709	0	0.0364488	0	0.0174034	0.0586913	0	0.0207046	0	0.0118253	0	0.0159107	0.628723	0	0	0.103622	0	0	0	0.31	0.0579333	1.09549
CGGA_884	Pattern B	0	0.0806424	0.0274971	0.0775809	0.0906668	0	0	0	0.122783	0	0.137751	0	0.0360117	0	0	0.332067	0.00396062	0.0324519	0	0.0303715	0.0121142	0.0161023	0.59	0.0198875	1.08168
CGGA_888	Pattern B	0.192383	0	0	0	0	0.153868	0	0.0160425	0	0	0.0147208	0.0659685	0.0294773	0	0	0.482081	0	0.000191649	0.0297556	0	0	0.0155111	0.65	0.0122681	1.10179
CGGA_890	Pattern B	0.0318071	0	0	0.00792629	0	0.179164	0	0	0.145449	0	0.114883	0	0.0542805	0	0.0124598	0.322912	0	0	0.0911568	0	0.00415768	0.0358043	0.57	0.0249855	1.07806
CGGA_899	Pattern B	0.0603217	0	0	0.043	0.0100702	0.0189181	0	0	0	0	0	0.0546605	0.159331	0	0.072986	0.470948	0.0160814	0	0.0936831	0	0	0	0.18	0.117656	1.05798
CGGA_901	Pattern B	0.0330567	0	0.011486	0	0	0.0929029	0	0.000466262	0.00619327	0	0.0494495	0.000640512	0.062634	0	0.00105531	0.261965	0.0776918	0	0	0.324756	0	0.0777031	0.12	0.150615	1.04583
CGGA_902	Pattern B	0.00312814	0	0	0	0	0.234953	0	0.0561135	0.0944161	0	0.0602299	0	0.0258683	0.241095	0.00463781	0.168308	0	0	0	0.043598	0	0.0676529	0.2	0.106353	1.06605
CGGA_903	Pattern B	0	0.010349	0.00662046	0.0248299	0	0.115861	0	0	0.0466958	0	0.0965144	0	0.2152	0	0.00624282	0.383305	0.00521141	0.00477425	0.0541583	0	0	0.0302379	0.09	0.165512	1.02971
CGGA_904	Pattern B	0	0.0257936	0.0155123	0	0	0.267427	0	0	0.0834441	0	0.122338	0	0.036215	0	0.00358843	0.41624	0	0	0	0.0266478	0.0027931	0	0.32	0.0561562	1.08
CGGA_D02	Pattern B	0.0282975	0	0	0	0.0411842	0	0	0.0403024	0.0646195	0	0.0705259	0	0	0.214387	0	0.478011	0	0.0210141	0.0091483	0.0193091	0	0.0132016	0.12	0.151603	1.06441
CGGA_D11	Pattern B	0.027082	0	0	0.041338	0	0.0479214	0	0.0704072	0	0	0	0.0800384	0.0675152	0	0.0748147	0.361425	0.0446934	0	0	0.151496	0	0.0332683	0.06	0.205453	1.01429
CGGA_D15	Pattern B	0	0.145939	0	0.0293814	0.101957	0	0	0.198424	0	0	0	0.0916464	0.0152378	0	0	0.283472	0	0	0.131417	0.00252557	0	0	0.88	-0.0219597	1.09525
CGGA_D19	Pattern B	0	0.0630265	0.032385	0.0129731	0.0552713	0	0	0.0777126	0	0	0	0.0588606	0	0	0.0128744	0.324448	0.0840147	0	0	0.245044	0	0.0333896	0.46	0.0396036	1.08488
CGGA_D21	Pattern B	0.0394492	0	0	0.118542	0	0.0438255	0	0	0	0	0.0070537	0.0486405	0.182059	0	0.0154684	0.47963	0	0	0.0653311	0	0	0	0.05	0.250444	0.995335
CGGA_D26	Pattern B	0.0692609	0	0	0.0349818	0	0.0704896	0	0.0393969	0.0890998	0	0.120427	0	0	0.0152362	0.0358475	0.268239	0.0824798	0	0.138931	0	0.0174034	0.0182068	0.51	0.0324822	1.06061
CGGA_D32	Pattern B	0.0334776	0	0	0	0	0.0514922	0	0.0468593	0.0392279	0.00425763	0	0.0114832	0	0.251232	0.0134894	0.46808	0	0.0117945	0	0.0528355	0	0.0157707	0.06	0.193012	1.05259
CGGA_D34	Pattern B	0.0329125	0	0	0.069713	0	0	0	0.0767622	0	0	0	0.064007	0.168045	0	0.0271916	0.31863	0.127558	0	0	0.115179	0	0	0.12	0.153654	1.03226
CGGA_D36	Pattern B	0	0.0520972	0	0	0	0.123583	0	0.0559405	0.0762074	0	0.0544237	0	0.0196561	0.0973582	0.00126009	0.233623	0.013399	0.024042	0	0.107901	0.0133565	0.127153	0.21	0.0966935	1.0546
CGGA_D44	Pattern B	0.00299503	0	0.0350931	0	0.0562737	0.156956	0	0	0	0	0	0.112204	0.0320423	0	0.0869265	0.282955	0.0721766	0	0	0.162377	0	0	0.35	0.0524281	1.08211
CGGA_D45	Pattern B	0.0722958	0	0.0345322	0.00569589	0.214104	0	0	0.010499	0	0	0.0103886	0.0532228	0.0133011	0	0.00230288	0.41023	0.0623771	0	0	0.111051	0	0	0.71	0.00358197	1.09551
CGGA_D46	Pattern B	0	0.0196776	0.0248125	0	0.210318	0.0432467	0	0.0120042	0	0	0	0.122518	0	0	0	0.371014	0	0.00665522	0.189754	0	0	0	0.77	-0.00201616	1.08875
CGGA_D50	Pattern B	0.199581	0	0	0.0338267	0	0.0510981	0	0.0360727	0.0310605	0	0.073066	0	0.00584346	0.243777	0	0.288462	0	0.0218519	0	0.0153604	0	0	0.09	0.166575	1.03808
CGGA_J023	Pattern B	0.0947546	0	0.0253458	0.0324619	0.0510093	0	0	0.0543151	0	0	0	0.0946239	0.00401624	0	0.0401853	0.398638	0.110172	0	0.0897212	0	0	0.00475603	0.88	-0.0227335	1.09709
CGGA_J50	Pattern B	0.0281048	0	0.00150109	0	0	0.196458	0	0.00351828	0.0410069	0	0.0623068	0.0448042	0.20738	0	0.00226178	0.278611	0	0.00150152	0	0.117727	0.00469157	0.010127	0.3	0.0633898	1.07138
CGGA_J73	Pattern B	0	0.134071	0.0307756	0	0.115316	0	0	0.0995837	0.0257875	0	0	0.12512	0.0336737	0	0.00618711	0.236519	0.0126277	0	0	0.180339	0	0	0.8	-0.0108951	1.10513
CGGA_P100	Pattern B	0	0.0478275	0.0229348	0	0	0.0781937	0	0.023195	0	0	0.0259385	0.108838	0.00494139	0.00973558	0	0.461961	0	0.00708691	0.208142	0	0	0.00120592	0.2	0.10863	1.04979
CGGA_P102	Pattern B	0.0328242	0	0.0138119	0.183919	0	0.163731	0	0	0	0	0.0734931	0	0.0166303	0.0648167	0	0.0682222	0	0	0	0.226282	0.0180619	0.138208	0.05	0.229737	1.00711
CGGA_P103	Pattern B	0	0.0493873	0.0065427	0	0.168377	0	0	0	0.0868397	0	0.122899	0.0068268	0.0698183	0	0.0157381	0.237032	0.0724878	0	0	0.137063	0	0.026988	0.77	-0.000688639	1.08438
CGGA_P106	Pattern B	0.278289	0	0	0.0497997	0	0.150925	0	0	0.0720177	0	0.00227829	0.0199891	0.0895719	0.0696865	0	0.147337	0	0	0.102611	0	0	0.0174958	0.49	0.0355021	1.07681
CGGA_P108	Pattern B	0.105624	0	0	0	0	0.235956	0	0	0.0746447	0	0	0.0585734	0.041918	0.0544543	0	0.315135	0	0.0153082	0.0617089	0	0	0.036678	0.53	0.0302778	1.07725
CGGA_P109	Pattern B	0.00696149	0	0.00277408	0.062636	0	0.0649944	0	0	0.000333661	0	0.0258717	0.0215358	0.131595	0	0.00598479	0.489926	0	0	0.090733	0.08839	0	0.00826444	0.06	0.196984	1.0214
CGGA_P110	Pattern B	0.055491	0	0.00114195	0.0433724	0	0.0232865	0	0.0465215	0	0	0	0.0218955	0	0.0340856	0.0149016	0.391992	0	0	0	0.340297	0	0.0270148	0	0.37466	0.940557
CGGA_P111	Pattern B	0	0.0439101	0.00974597	0.0306652	0	0.154987	0	0.00254953	0.0137502	0	0.0628429	0.00397574	0.0899549	0	0.0738903	0.224094	0.167607	0	0.0212519	0	0.000950491	0.0998251	0.09	0.162315	1.02045
CGGA_P128	Pattern B	0	0.0494763	0.00379987	0.056637	0	0.270074	0	0	0.0346399	0	0.145257	0.0227338	0.0490307	0	0.0142094	0.324015	0	0	0	0	0.0157788	0.0143483	0.21	0.0973546	1.06512
CGGA_P13	Pattern B	0.0970293	0	0	0.023056	0.0451711	0.0732517	0	0.0662329	0	0	0	0.0289722	0.0195556	0	0	0.301632	0.0821509	0	0	0.238728	0	0.0242211	0.37	0.051696	1.07522
CGGA_P131	Pattern B	0.05917	0	0	0.0288265	0	0.183142	0	0	0.0586801	0	0.0124248	0.0635791	0.0362594	0	0.0259833	0.312288	0.109304	0	0	0.0781472	0.00467216	0.0275233	0.21	0.0999285	1.04864
CGGA_P132	Pattern B	0.0985457	0	0	0.0515684	0	0.108894	0	0	0.0203069	0	0.0314525	0.0296046	0.025065	0	0.0259288	0.484845	0.0431864	0	0	0.0457948	0.0202752	0.0145321	0.17	0.12261	1.05032
CGGA_P137	Pattern B	0	0.00819591	0.00427177	0	0	0.110952	0	0.0106962	0.0151792	0	0.0315735	0.00778158	0.0422659	0	0.00238164	0.143294	0.0567419	0	0	0.555985	0.0106809	0	0	0.514414	0.862958
CGGA_P143	Pattern B	0.0359456	0	0.0229338	0	0	0.11433	0	0.0357509	0	0	0.013944	0.0070859	0.0540176	0	0.0587268	0.244166	0	0.0131715	0	0.325621	0.0100292	0.0642779	0.49	0.0353998	1.09561
CGGA_P147	Pattern B	0.00151647	0.0188535	0.00154077	0.0034914	0	0.11941	0	0.0335437	0	0	0	0.0925014	0.0133596	0	0.00375765	0.319108	0.15439	0	0	0.216292	0.0045664	0.0176692	0	0.356385	0.942072
CGGA_P156	Pattern B	0	0.0489082	0.00813081	0	0	0.129636	0	0	0.0180962	0	0.050587	0.00656724	0.106602	0	0.00479529	0.10372	0.115935	0	0	0.372549	0	0.034473	0.18	0.117087	1.05776
CGGA_P157	Pattern B	0.0298265	0	0	0.0417495	0	0.0620969	0	0.0186672	0	0	0	0.0478592	0.0746774	0	0.0373891	0.423949	0.0877568	0	0.115434	0.00756682	0	0.0530283	0.43	0.0428487	1.07836
CGGA_P159	Pattern B	0.0350312	0	0	0.0528926	0	0.231304	0	0	0.0257195	0	0.0798719	0.0352072	0.0564713	0	0.0234211	0.381997	0.012502	0	0.0655822	0	0	0	0.43	0.0456201	1.07652
CGGA_P160	Pattern B	0.0326776	0	0	0.0173947	0	0.111967	0	0.040049	0	0	0	0.106344	0.0529837	0	0.00869015	0.166603	0.0160924	0	0	0.398854	0.0249665	0.0233774	0.06	0.217715	1.03334
CGGA_P163	Pattern B	0.061781	0	0.0116184	0.108864	0	0.0709705	0	0.043016	0	0.0127609	0	0.0789029	0.0351135	0	0.077669	0.259573	0.112907	0	0	0.105562	0	0.021261	0	0.34032	0.94455
CGGA_P17	Pattern B	0.0295864	0.00900384	0	0.0951855	0	0.126824	0	0	0.107405	0	0.108118	0	0.196204	0	0.0133651	0.240999	0.0465622	0	0.019697	0	0.0018529	0.00519723	0.06	0.204503	1.00685
CGGA_P173	Pattern B	0.0235678	0	0	0	0	0.0868859	0	0	0.00465788	0	0.0091753	0.0186352	0.22993	0	0.0163181	0.375041	0.119678	0	0.0752633	0.0269039	0	0.013944	0.06	0.207288	1.01463
CGGA_P174	Pattern B	0	0.0161879	0.0118774	0.0384295	0	0.240114	0	0	0.0318954	0	0.0860526	0.0389894	0.0657136	0	0.0271797	0.328865	0.0438724	0	0	0.0510886	0.0197352	0	0.21	0.101558	1.05301
CGGA_P176	Pattern B	0.0336878	0	0	0	0.0748408	0.0172497	0	0.0221684	0	0	0	0.0342804	0.225543	0	0	0.0315306	0.0723768	0	0	0.433846	0	0.054476	0.25	0.0753584	1.10596
CGGA_P177	Pattern B	0.0415812	0	0	0	0	0.0859315	0	0.0169414	0	0	0	0.0366433	0.168262	0	0.000870416	0.307644	0.0601589	0	0	0.281968	0	0	0.07	0.188245	1.02934
CGGA_P179	Pattern B	0	0.0441719	0.0279222	0	0.150795	0.104647	0	0	0.0518697	0	0	0.108997	0.00870767	0	0	0.292358	0	0	0.203258	0	0	0.00727333	0.78	-0.0032231	1.08225
CGGA_P18	Pattern B	0	0.0270299	0.0127041	0	0	0.1737	0	0.0244006	0	0	0	0.106684	0.0313784	0	0.00288793	0.230398	0.0301684	0	0	0.342331	0.013447	0.00487021	0.06	0.193476	1.03606
CGGA_P181	Pattern B	0.028039	0	0	0	0	0.0822243	0	0.0170468	0	0	0	0.0269514	0.24378	0	0.020954	0.334106	0	0	0	0.246899	0	0	0.12	0.15325	1.0496
CGGA_P182	Pattern B	0.00774079	0	0.00308199	0	0	0.0692556	0	0.091989	0	0.0482901	0	0.052312	0.0211401	0	0.00383735	0.189014	0.045268	0.00318529	0	0.416779	0.0111016	0.037006	0.05	0.241592	1.01616
CGGA_P183	Pattern B	0	0.111078	0	0.0156867	0.0877491	0	0	0.12588	0	0	0	0.0985249	0.00202871	0	0	0.224359	0.0393162	0	0	0.295018	0	0.000359284	0.75	0.00109084	1.11458
CGGA_P185	Pattern B	0	0.0274605	0.0109205	0.0148317	0	0.267901	0	0	0.0599904	0	0.115138	0.00679434	0.0514734	0	0.00642805	0.353277	0	0	0.0467434	0	0	0.0390415	0.21	0.101937	1.05309
CGGA_P19	Pattern B	0.0107426	0	0	0	0	0.0903182	0	0.00826219	0.0151911	0	0.0160812	0.0209668	0.107025	0	0.00144259	0.104877	0.14037	0	0	0.471833	0	0.0128904	0.03	0.26563	1.00664
CGGA_P199	Pattern B	0	0.068106	0.00706329	0.0275469	0	0.103297	0	0.00120845	0.0257253	0	0.148461	0.0287107	0.183131	0	0	0.300796	0	0.00682504	0.0763826	0	0	0.0227475	0.54	0.0286345	1.0813
CGGA_P22	Pattern B	0	0.0331324	0.00667696	0.0287589	0.036157	0.0482687	0	0	0.0438118	0	0.104903	0	0.0440521	0	0	0.55494	0.00628736	0	0.0812911	0	0.00346266	0.00825828	0.13	0.14608	1.04478
CGGA_P27	Pattern B	0	0.1064	0.0337169	0	0	0.216617	0	0	0.0832674	0	0.0785466	0.0309529	0.113857	0	0.00953108	0.150877	0.0195521	0	0	0.145929	0.00865186	0.00210109	0.1	0.160274	1.02017
CGGA_P28	Pattern B	0.00863561	0	0.000992763	0.0454768	0	0.0478504	0	0.00924262	0.012377	0	0	0.0869112	0.021588	0	0.00245026	0.23669	0.0421025	0.0033264	0	0.416034	0	0.0663226	0.26	0.0719546	1.11665
CGGA_P283	Pattern B	0	0.0323018	0.0135722	0.0680227	0	0.117218	0	0.0122402	0.0262221	0	0.0412584	0.0376258	0.0246827	0	0.0377375	0.436713	0	0	0.145033	0	0	0.00737273	0.31	0.0579262	1.0643
CGGA_P30	Pattern B	0	0.0106567	0	0	0	0.205009	0	0.0257656	0	0	0.0743018	0.022925	0.120189	0.224715	0	0.285359	0	0.00172651	0.0293533	0	0	0	0.28	0.0680175	1.0833
CGGA_P319	Pattern B	0.048986	0	0	0.0477854	0	0.0445429	0	0.0481163	0.00400798	0	0	0.000866036	0.00889665	0.124194	0.0214504	0.593841	0	0	0.0271723	0.0300529	0	8.81044e-05	0	0.363463	0.951272
CGGA_P328	Pattern B	0.00603601	0	0.00459889	0.0264861	0	0.0587927	0	0.021731	0	0	0	0.0428404	0.236941	0	0	0.360873	0	0.00476512	0	0.230623	0.00631345	0	0	0.397463	0.924452
CGGA_P399	Pattern B	0	0.069298	0.0108241	0.0070974	0	0.117697	0	0.0272766	0.0471636	0	0.117252	0	0.0662477	0	0	0.354538	0.0210398	0.00354687	0	0.137762	0	0.0202577	0.35	0.0523355	1.06948
CGGA_P411	Pattern B	0.104539	0	0	0.0340299	0	0.0891933	0	0	0.0154827	0	0	0.0278375	0	0.0215422	0.00584174	0.607659	0	0.00401	0.0790719	0	0	0.0107924	0.09	0.167221	1.04374
CGGA_P421	Pattern B	0.0842822	0	0	0.0787096	0	0.0730566	0	0	0.0160333	0	0.0237001	0	5.45313e-05	0	0.0103724	0.522065	0.0715847	0	0.0592319	0	0.0184202	0.0424899	0.12	0.154211	1.03829
CGGA_P446	Pattern B	0.0802345	0	0	0	0	0.251912	0	0	0.0597139	0	0	0.138788	0.0155309	0.0210043	0	0.328226	0	0.0190964	0.083848	0	0	0.00164548	0.99	-0.049543	1.12033
CGGA_P483	Pattern B	0.0753156	0	0	0.0743967	0	0.0208117	0	0	0.0285809	0	0.0192459	0.000185784	0.00970823	0.0607507	0.0053063	0.584377	0	0	0.10865	0	0	0.0126708	0.01	0.283694	0.985445
CGGA_P492	Pattern B	0.00832147	0	0.00311902	0.0327579	0	0.181979	0	0.0117025	0	0	0.0330591	0.056568	0.0389318	0	0.0197489	0.209273	0.0348633	0	0	0.367984	0.00169085	0	0.25	0.0795115	1.09088
CGGA_P512	Pattern B	0.0493968	0	0	0.00875794	0	0.0205843	0	0.00271137	0	0	0	0.0209901	0.0236237	0.105664	0.00712077	0.624932	0	0	0.106676	0.0212589	0	0.00828316	0	0.354188	0.960224
CGGA_P585	Pattern B	0.0520539	0	0.00943541	0.118561	0	0.0515515	0	0.00575335	0	0	0	0.0155689	0.0381914	0	0.00809487	0.365889	0.0122014	0.00302698	0	0.29198	0.00592537	0.0217674	0.56	0.0266581	1.10133
CGGA_P594	Pattern B	0.0111771	0.0174875	0	0.0729459	0	0.0767767	0	0	0.0812256	0	0.0677537	0	0.0568296	0	0.0072338	0.425847	0.0177609	0.00315319	0.12569	0	0.0122622	0.0238563	0.31	0.0574446	1.06508
CGGA_P604	Pattern B	0.207032	0	0	0	0	0.176688	0	0	0.0249414	0	0.0171554	0.0209803	0.00846316	0	0.0253322	0.484472	0	0	0.0150267	0	0	0.0199088	0.47	0.0384096	1.09065
CGGA_P84	Pattern B	0.0266642	0.0117188	0	0.0877563	0	0.14505	0	0	0.0641837	0	0.0577477	0.00311453	0.0919311	0	0.0114	0.389548	0.0416364	0	0	0	0.0211558	0.0480933	0.24	0.0853492	1.06221
CGGA_P86	Pattern B	0	0.0138115	0.0114762	0.00195258	0	0.248968	0	0.0272281	0.0946311	0	0.0961417	0	0.0583905	0	0	0.222818	0.0432469	0.0136649	0	0	0	0.167671	0.32	0.0563483	1.08234
CGGA_P89	Pattern B	0.0321432	0	0	0	0	0.115874	0	0.0388648	0	0	0	0.0499472	0.103132	0	0.00924323	0.14301	0.00869196	0	0	0.434303	0.02708	0.0377121	0.44	0.0422235	1.12012
CGGA_P93	Pattern B	0.0366852	0	0	0	0	0.17425	0	0.0117402	0	0	0.000615768	0.0758381	0.24525	0	0	0.311752	0.00291569	0	0.0195881	0.109936	0	0.0114291	0.05	0.233368	1.00015
GSM2899179	Pattern B	0	0.023252	0.00348334	0.0451423	0	0.127374	0	0	0.080249	0	0.0604104	0.0472287	0.0121781	0.00200881	0.0294849	0.319312	0	0	0.249876	0	0	0	0.34	0.053183	1.05694
GSM2899186	Pattern B	0.0243612	0	0.0079675	0.00325096	0	0.0771355	0	0	0.006007	0	0.0277187	0.018201	0.186794	0	0	0.40753	0	0.00327887	0.1881	0	0	0.0496563	0	0.394752	0.920861
GSM2899200	Pattern B	0	0.0228763	0.0100227	0.0364647	0	0.0313922	0	0.029689	0.0316449	0	0.0143929	0	0	0.398362	0	0.340217	0	0	0	0.0696014	0	0.0153372	0	0.331126	0.986128
GSM2899206	Pattern B	0.0568066	0	0.0457844	0.0396727	0	0.0341718	0	0.0126332	0	0	0	0.0229649	0.124477	0	0.0101516	0.537742	0	0	0.108234	0	0	0.00736183	0.07	0.180486	1.02954
GSM2899209	Pattern B	0.0296605	0	0.0183932	0.0762222	0.0195491	0	0	0.01668	0	0	0	0.0188883	0.179205	0	0.0157071	0.491166	0.0584243	0	0.0761044	0	0	0	0.12	0.155955	1.04254
GSM2899211	Pattern B	0.06716	0	0	0.0623642	0	0.0921744	0	0	0	0	0	0.0417159	0.0841595	0	0.00704069	0.536662	0.0185014	0	0	0.0874547	0	0.00276749	0.05	0.239301	1.00539
GSM2899213	Pattern B	0	0.0161066	0.0145647	0.0166639	0	0.133005	0	0.0277609	0	0	0.0183422	0.0417797	0.0814205	0	0.132859	0.422888	0.00865857	0	0.059148	0	0	0.0268031	0.18	0.115974	1.05613
GSM2899220	Pattern B	0.0145057	0	0.0602292	0.0393173	0	0.00880027	0	0.0585684	0	0	0	0.0445904	0.0651214	0	0.00490725	0.314984	0	0	0	0.388976	0	0	0.04	0.259546	1.00439
GSM2899228	Pattern B	0.0388174	0	0.0161487	0	0.0310685	0.0442888	0	0.0880077	0	0	0	0.0968272	0.142713	0	0.00218322	0.403101	0	0	0.096077	0.00952838	0	0.0312391	0.3	0.0615914	1.06982
GSM2899229	Pattern B	0	0.0147656	0	0.00486839	0	0.103219	0	0.0642136	0	0	0	0.0449568	0.21199	0	0.0117946	0.301682	0.018668	0	0.13155	0.0922914	0	0	0.09	0.162793	1.02237
GSM2899242	Pattern B	0.0389721	0	0	0.0485869	0	0.312072	0	0	0.0629481	0	0.0877847	0.0608972	0.0585276	0.0414687	0	0.154217	0	0.00384537	0	0.121174	0.00950682	0	0.5	0.0344611	1.09851
GSM2899260	Pattern B	0	0.0140519	0.00938635	0	0	0.144492	0	0.0678613	0	0	0	0.10725	0.0983458	0	0.0127655	0.342119	0.0362503	0	0	0.134217	0	0.03326	0.25	0.0773538	1.07011
GSM2899274	Pattern B	0.00719226	0	0	0.00447142	0	0.136131	0	0.0675521	0	0	0	0.0321234	0.21081	0	0.0542095	0.330066	0	0.00492814	0.0226084	0.0964423	0	0.0334656	0.16	0.127463	1.04572
GSM2899275	Pattern B	0	0.00268134	0	0.0374938	0	0.0761293	0	0	0	0	0	0.0747437	0.173551	0	0.0381215	0.329535	0.0505665	0	0.108924	0.108253	0	0	0	0.333835	0.949757
GSM2899277	Pattern B	0	0.0380337	0.00484312	0	0	0.113965	0	0.0153952	0.00031247	0	0	0.0575161	0.0965377	0	0.00406385	0.304285	0	0	0	0.359339	0	0.00570916	0	0.321605	0.968841
GSM2899280	Pattern B	0.00837807	0	0.00701954	0.0780946	0	0.0980456	0	0.0577726	0.00374697	0	0	0.0649215	0.0141114	0	0.000139003	0.304728	0.0826077	0	0	0.25413	0.0230675	0.00323748	0.25	0.0818476	1.07238
GSM2899281	Pattern B	0.0335596	0	0.00792445	0.0437877	0	0.105177	0	0.00858928	0.0382668	0	0	0.06774	0.16751	0	0	0.421022	0	0	0	0.106423	0	0	0.3	0.0642473	1.07997
GSM2899284	Pattern B	0.0783264	0	0	0.0511089	0	0.134147	0	0.00619311	0.00345528	0	0.0631695	0.0454541	0.0276689	0	0.00192239	0.478649	0	0.00635259	0.0880642	0	0	0.015489	0.05	0.220908	1.00277
GSM2899287	Pattern B	0.0257481	0	0.0358053	0.0511259	0	0.0127267	0	0.0214003	0.000561146	0	0	0.0822071	0.131144	0	0.00101694	0.447046	0.10188	0	0.07255	0.0167882	0	0	0	0.341612	0.948348
GSM2899291	Pattern B	0	0.020021	0.0872585	0.197794	0	0.00381255	0	0.00833257	0	0.0972897	0	0	0.130694	0	0.0189302	0.346031	0	0.0320199	0.0193394	0	0	0.0384763	0.18	0.115658	1.04508
GSM2899297	Pattern B	0.0335263	0	0	0.158613	0	0.00402029	0	0.0609451	0	0	0	0.0902719	0.136599	0	0	0.332403	0	0.00523901	0.161899	0	0	0.0164837	0.61	0.0177496	1.07985
GSM2899307	Pattern B	0	0.0442282	0.0151703	0.0646616	0	0.0267215	0	0.0312671	0.0868174	0	0.0167861	0.0264476	0.015876	0	0.0178168	0.289817	0.0718019	0.0114724	0.246948	0	0.0257518	0.00841639	0.46	0.0391822	1.05121
GSM2899324	Pattern B	0.0635038	0	0	0	0	0.223388	0	0	0.0714838	0	0	0.054937	0.00280251	0.253545	0.00596887	0.283198	0	0	0.0411732	0	0	0	0.22	0.0946315	1.07266
GSM2899326	Pattern B	0.0507951	0	0	0.00288601	0	0.210974	0	0.0212708	0.0183187	0	0.0762441	0.00724206	0.0266036	0.0333573	0	0.270242	0	0.0246624	0.207231	0	0.0346149	0.015559	0.55	0.0270486	1.06047
GSM2899327	Pattern B	0	0.00808392	0.00301359	0.0843829	0	0.0901845	0	0.00541619	0.0577764	0	0.0712796	0.00692667	0.0115618	0.291622	0.00725351	0.329144	0	0	0.0181192	0	0	0.0152355	0	0.317247	0.972384
GSM2899331	Pattern B	0.00427597	0	0.00556149	0.0359809	0	0.0672158	0	0.0150597	0.00934868	0	0.0509683	0.00429337	0.0842578	0	0.010857	0.593917	0	0	0.0737279	0	0.000236133	0.0442994	0.09	0.165021	1.04721
GSM2899332	Pattern B	0	0	0.0099551	0	0	0	0	0.0511464	0	0	0.0136919	0	0	0.479759	0.0305202	0.26739	0	0	0.113027	0	0	0.0345096	0	0.409466	0.942101
GSM2899339	Pattern B	0.0848641	0	0	0.0720819	0	0.105725	0	0.022077	0.0184689	0	0.0435272	0.0491623	0.0277977	0	0	0.480991	0.00190706	0	0.0646293	0	0	0.0287681	0.25	0.0754019	1.06887
GSM2899342	Pattern B	0.109709	0	0	0.0405837	0	0.207329	0	0	0.0351757	0	0.0684783	0	0.103738	0	0.000996208	0.226607	0.00422759	0.00296245	0	0.151445	0	0.0487484	0.42	0.0476736	1.06868
GSM2899343	Pattern B	0	0.0254244	0.00183173	0	0.0624888	0.05842	0	0.071517	0	0	0.0477027	0.0489954	0.108268	0	0	0.455959	0	0	0.0444139	0.0185858	0	0.0563938	0.6	0.0182787	1.09703
GSM2899344	Pattern B	0	0	0	0.0283828	0	0.0835667	0	0.0135066	0.0375446	0	0	0.0283905	0.00125135	0.0196235	0.00357404	0.605284	0	0.0036299	0.175246	0	0	0	0.18	0.116075	1.06682
GSM2899345	Pattern B	0.032867	0	0.0092932	0.0240118	0	0.165712	0	0.0379337	0.017289	0	0.124978	0.00417625	0.0585368	0	0.00391629	0.246296	0	0.00415855	0	0.229734	0.00815256	0.0329443	0.3	0.0628794	1.07179
GSM2899346	Pattern B	0	0.145066	0.0260177	0	0.0593389	0.141298	0	0.0114489	0	0	0.0745073	0	0.0965501	0.0949122	0	0.221614	0	0.00845329	0	0.0529338	0	0.0678609	0.59	0.0197131	1.07718
GSM2899347	Pattern B	0.0291681	0	0.00601207	0.0721205	0	0.0846005	0	0.0104262	0.0129398	0	0.046893	0.0130414	0.0754647	0	0	0.581101	0	0	0	0.0240287	0.013687	0.0305168	0.08	0.16949	1.04376
GSM2899349	Pattern B	0.0227533	0	0.00077363	0	0	0.277915	0	0.0321063	0.049039	0	0	0.08295	0.00916748	0	0.144432	0.255321	0	0	0.125542	0	0	0	0.15	0.133489	1.04433
GSM2899350	Pattern B	0	0.0713368	0.0190488	0.0483657	0	0	0	0.132262	0	0.0133957	0	0.0652085	0.0574883	0.206095	0.00652047	0.344985	0	0.000172295	0.0351212	0	0	0	0.15	0.136684	1.04881
GSM2899351	Pattern B	0.0325736	0	0	0.00607646	0.0165178	0.00758941	0	0.000404978	0	0	0.0408418	0	0	0.344914	0.0171984	0.385616	0	0	0.0848643	0.0346075	0	0.0287959	0	0.634358	0.773832
GSM2899352	Pattern B	0.086647	0	0	0.0497649	0	0.139258	0	0.0122955	0.0549981	0	0.0779798	0	0.0300291	0	0.00784775	0.457607	0	0	0	0.0282816	0	0.0552914	0.06	0.209048	1.0098
GSM2899353	Pattern B	0	0.0166187	0.0060685	0.00911996	0	0.156404	0	0.0317281	0.0132185	0	0.0587202	0.0248498	0.014269	0.194939	0	0.422007	0	0	0.0520577	0	0	0	0.12	0.156324	1.0481
GSM2899354	Pattern B	0.0171383	0	0	0.0222854	0	0.131849	0	0	0	0	0.155798	0	0.0956326	0	0.00413292	0.381405	0	0.00139149	0	0.149335	0	0.0410331	0.35	0.0527065	1.08429
GSM2899355	Pattern B	0.0304253	0	0	0	0	0.293481	0	0.0415207	0.0351704	0	0.155185	0.0406683	0.0678315	0	0.0278222	0.206279	0.0522783	0	0.0493396	0	0	0	0.67	0.00708434	1.09997
GSM2899358	Pattern B	0	0.0129717	0.00537273	0.0545728	0	0.0880249	0	0.0326871	0	0	0	0.0954418	0.0775174	0	0.00767115	0.293791	0.0604545	0	0	0.243646	0.00478934	0.0230597	0	0.303068	0.970357
GSM2899369	Pattern B	0	0.00562892	0.00419142	0.0514827	0	0.0839545	0	0.0331776	0.00751043	0	0.0391522	0	0.125706	0	0.0375553	0.551697	0.00108765	0	0.0409998	0	0	0.0178571	0.18	0.114342	1.06689
GSM2899371	Pattern B	0.0327465	0	0.0173038	0.0119003	0	0.0978876	0	0.0393845	0.078918	0	0.0815421	0	0.0102901	0.104158	0.00354325	0.400396	0	0	0.0177148	0.0683349	0	0.0358802	0.14	0.14003	1.04146
GSM2899380	Pattern B	0.0658042	0	0	0	0	0.08482	0	0.0227287	0.0296241	0.0318631	0	0.0590774	0	0.141688	0.0137505	0.438767	0	0.00164646	0	0.11023	0	0	0	0.445128	0.897332
GSM2899382	Pattern B	0.00633776	0	0.00854784	0.0819254	0	0.125191	0	0	0.000698154	0	0.00866059	0.0262675	0.0942943	0	0.0332244	0.523891	0.0474987	0	0.0286683	0	0	0.0147947	0.12	0.151307	1.04555
GSM2899384	Pattern B	0.0513146	0	0	0.0547171	0	0.0382728	0	0.0369041	0	0	0.00304944	0.0217437	0.109956	0.115765	0	0.430971	0	0	0.0413386	0.0283115	0.0175127	0.0501434	0.09	0.161191	1.04306
GSM2899393	Pattern B	0.0208992	0	0	0	0	0.313152	0	0	0.0696049	0	0.10006	0.0363889	0.0638018	0	0.0148421	0.347531	0	0	0	0.0172129	0.0165083	0	0.43	0.0440451	1.08723
GSM2899396	Pattern B	0.0148723	0	0	0.0632402	0	0.107714	0	0.0599928	0.0291171	0	0	0.0719901	0	0	0.00117345	0.470393	0	0.0147018	0.166805	0	0	0	0.3	0.0635814	1.06866
GSM2899397	Pattern B	0.0634724	0	0	0	0	0.153294	0	0.00453504	0.0319619	0	0.0724654	0	0.168209	0	0.00755073	0.358797	0	0.000157959	0	0.092087	0.0211482	0.0263218	0.22	0.0935964	1.0561
GSM2899399	Pattern B	0.00920184	0	1.56603e-05	0.000510038	0	0.0736231	0	0.0247149	0	0	0.005629	0.0198245	0.176304	0	0.0143643	0.479773	0.00108325	0	0.085009	0.0586416	0.00754875	0.0437572	0.05	0.234373	1.00764
GSM2899405	Pattern B	0	0.0200371	0.0112406	0.0699703	0	0	0	0.0366577	0	0	0.00703654	0	0	0.400094	0.0049284	0.416377	0	0	0.0149469	0.000325461	0	0.0183863	0	0.785499	0.634193
GSM2899406	Pattern B	0	0.0711147	0.00127007	0.0816644	0	0.0663162	0	0.0465289	0	0	0.0158428	0.0262416	0	0	0.0684528	0.505468	0.0538149	0	0.0367457	0.0265395	0	0	0.62	0.0160593	1.09857
GSM2899407	Pattern B	0.00190725	0	0.00349071	0	0.0240912	0.0618879	0	0.0773777	0.0389286	0.00173324	0	0.0746241	0	0.0616707	0.0226154	0.49885	0	0.00496812	0.121664	0	0	0.00619145	0.2	0.106408	1.06068
GSM2899409	Pattern B	0	0.0129351	0.00908417	0.016503	0	0.173719	0	0.0200826	0.00509759	0	0.0619846	0.0703719	0.0525664	0	0	0.457193	0	0.00498695	0.115475	0	0	0	0.3	0.0637478	1.07227
GSM2899417	Pattern B	0.0881204	0	0.00563191	0.116158	0	0.0669356	0	0.0157575	0.0206342	0	0	0.0427904	0.0957448	0	0.0370653	0.41583	0	0	0.0770308	0	0	0.0183012	0.45	0.0409207	1.07438
GSM2899420	Pattern B	0.0114124	0.000904608	0.05547	0.119191	0	0.0505682	0.03259	0.017483	0.0230232	0	0.129341	0	0.035204	0	0.00884592	0.432723	0.0144972	0	0	0.037839	0.0093001	0.021608	0.05	0.224149	1.00096
GSM2899423	Pattern B	0.0172932	0	0.00562951	0	0	0.0719449	0	0.0449704	0.0181594	0	0.0688299	0	0.0491315	0.127656	0.036978	0.526818	0	0	0	0.0298617	0	0.00272741	0.21	0.101126	1.08406
GSM2899425	Pattern B	0.047983	0	0.0138345	0.0438984	0	0.0165641	0	0.0448619	0	0	0.00967641	0.0257554	0.21752	0	0.0612087	0.423932	0	0	0.0492239	0	0	0.0455412	0.05	0.232216	1.00496
GSM2899426	Pattern B	0	0.0129363	0.0011981	0.012129	0	0.0611013	0	0.0492845	0.0213039	0	0.0816475	0	0.000952972	0.34572	0.00506187	0.390748	0	0	0.00603261	0.00164375	0	0.01024	0	0.431868	0.91557
GSM2899427	Pattern B	0	0.0366312	0.020283	0	0	0.215916	0	0.0186461	0.0549465	0	0.0705828	0.0784192	0.0517024	0	0.0455426	0.288421	0.011956	0	0.106953	0	0	0	0.45	0.0407285	1.07037
GSM2899428	Pattern B	0	0.11341	0.0021723	0	0.0195257	0.0198463	0	0.0854431	0	0	0.0899055	0	0.139358	0	0.010321	0.467006	0	0.00226642	0.0145756	0.0315636	0	0.00460686	0.47	0.0379077	1.08595
GSM2899432	Pattern B	0	0.0527915	0.00738508	0.0822643	0	0.111644	0	0.00071361	0.0134248	0	0.0565921	0	0.0210574	0	0.042986	0.426742	0.103357	0	0.0810427	0	0	0	0.09	0.164149	1.02218
GSM2899436	Pattern B	0.0370134	0.0321406	0.0700538	0.0298997	0	0.0812484	0	0.14684	0	0	0.0174532	0	0.0102447	0	0.00315122	0.461422	0.000842813	0	0	0.101914	0	0.00777639	0.78	-0.00576621	1.09936
GSM2899446	Pattern B	0.00126331	0.0254694	0	0.0409413	0	0.162774	0	0	0.105977	0	0.0649546	0	0.00455248	0.168672	0	0.351329	0	0.0332135	0	0.0091904	0.031663	0	0.21	0.098062	1.06596
GSM2899449	Pattern B	0	0.0166197	0.0021383	0.0361512	0	0.0217062	0	0.0468382	0.0185856	0	0.0641689	0	0	0.3433	0.0114845	0.325304	0	0.00258306	0	0.0906992	0.00192979	0.0184916	0	0.32443	0.978585
GSM2899452	Pattern B	0.0375022	0	0	0.0497294	0	0.0020502	0.048445	0.0577799	0	0	0	0.0299533	0.16795	0	0.127524	0.329427	0.00690589	0	0.142733	0	0	0	0.06	0.213315	1.00287
GSM2899454	Pattern B	0.183267	0	0	0	0	0.20152	0	0	0.0365498	0.0418112	0	0.0549254	0.00507004	0.0991085	0.00397712	0.0441636	0	0.016978	0.31263	0	0	0	0.57	0.0240818	1.06645
GSM2899455	Pattern B	0.0159754	0	0.0430007	0.000854332	0	0.191252	0	0.0177757	0.0759483	0	0.131244	0.0047543	0.0486455	0	0.000915363	0.257872	0.00913763	0	0	0.17148	0	0.0311443	0.75	0.00079602	1.09141
GSM2899458	Pattern B	0	0.049117	0.0127819	0.0203368	0	0.0731147	0	0.0563954	0	0	0	0.115881	0.137511	0	0.0132972	0.3389	0	0.0143062	0	0.14961	0	0.0187482	0.12	0.154613	1.03753
GSM2899461	Pattern B	0.0429643	0	0	0.0104813	0	0.150504	0	0.0379633	0.0654279	0	0.12533	0	0.0277125	0.319073	0.00307516	0.179919	0	0	0	0.0331055	0	0.00444425	0.13	0.148903	1.05229
GSM2899466	Pattern B	0.0341795	0	0	0	0	0.0916582	0	0.0446767	0.0698463	0	0.024959	0.0208143	0.0123493	0.2347	0.0109151	0.424748	0	0	0.0223216	0	0	0.0088319	0.06	0.193787	1.03751
GSM2899471	Pattern B	0.0232283	0	0.0198438	0.0402775	0.029847	0.104044	0.00766836	0.0217594	0	0	0	0.0570287	0.0280202	0.052961	0.0132465	0.362187	0.0722847	0	0.140571	0	0.0148126	0.0122207	0.14	0.142235	1.02678
GSM2899472	Pattern B	0.0249072	0	0	0	0	0.0857233	0	0.0429508	0	0	0	0.0364459	0.14135	0	0.00243228	0.34088	0.0393243	0.00316531	0	0.266917	0.00782492	0.00807942	0	0.496118	0.867845
GSM2899477	Pattern B	0	0	0.0239038	0.0191113	0	0.098236	0	0.0169144	0.0851433	0	0.101939	0.0805135	0.0787339	0	0	0.42104	0.00671767	0.0052051	0.062542	0	0	0	0.3	0.0633821	1.07787
GSM2899478	Pattern B	0.0224744	0	0.005479	0.100791	0	0.0652234	0	0.123743	0	0	0	0.0951132	0.0423249	0	0.018921	0.32125	0.0135459	0.00897981	0	0.160314	0	0.0218398	0.41	0.0483111	1.08325
GSM2899483	Pattern B	0.0566656	0	0	0.0653078	0	0.124284	0	0	0.0867958	0	0	0.110997	0.0136881	0.0347634	0.0178718	0.285004	0	0	0.204623	0	0	0	0.53	0.0295067	1.07195
GSM2899484	Pattern B	0	0.0201816	0.00155211	0.0670087	0	0.204664	0	0	0.0235212	0	0.010921	0.0192769	0.0257382	0	0.10938	0.39397	0.0160408	0	0.0918255	0	0	0.0159194	0.25	0.0754918	1.06475
GSM2899485	Pattern B	0.0258278	0	0	0.0191093	0	0.11242	0	0	0.114984	0	0.0731468	0	0.0341329	0.10202	0.00606679	0.342814	0	0	0.169478	0	0	0	0.62	0.0165902	1.07913
GSM2899486	Pattern B	0.0444404	0	0.00359224	0	0	0.0794652	0	0.0087392	0.00683079	0	0	0.0502541	0.151874	0	0.0489371	0.48206	0.0189174	0	0.0456705	0.013809	0	0.0454101	0.15	0.135697	1.05376
GSM2899492	Pattern B	0.111521	0	0	0.0263897	0	0.106605	0	0	0.0215827	0	0.0406297	0	0.181214	0	0.00404314	0.338103	0	0	0.113978	0.0411541	0	0.01478	0.06	0.200417	1.00423
GSM2899495	Pattern B	0.025579	0	0	0.0555653	0	0.154593	0	0.0175314	0.0152212	0	0.113112	0	0.0145943	0.0906961	0.016268	0.465451	0	0	0.00756226	0	0	0.0238261	0.1	0.159432	1.04193
GSM2899497	Pattern B	0.0195043	0	0	0.0549953	0	0.184709	0	0.00640569	0.0920791	0	0.0594625	0	0.00492513	0.176319	0.0177256	0.305048	0	0	0.0728377	0	0	0.00598941	0.12	0.154054	1.03506
GSM2899500	Pattern B	0.0616468	0	0	0.0195315	0	0.164619	0	0	0.0849804	0	0.0717787	0.0112609	0.00828879	0.208329	0	0.317279	0	0	0	0.0291156	0	0.0231705	0.5	0.0334114	1.09775
GSM2899501	Pattern B	0.0274068	0	0.00573345	0	0	0.163905	0	0	0.048177	0	0.0732714	0	0.0496133	0.105635	0.0654545	0.382248	0	0	0	0.0527462	0.00888722	0.016922	0.2	0.106546	1.05759
GSM2899502	Pattern B	0.00794063	0	0.00673937	0	0	0.226891	0	0	0.0949297	0	0	0.0735967	0.00682546	0.0602838	0	0.346034	0	0.00987842	0.158925	0	0.00795575	0	0.24	0.0846467	1.05509
GSM2899504	Pattern B	0.0116944	0.00553314	0.0425639	0.0868751	0	0.217288	0	0	0.176366	0	0.076671	0.0223018	0.0499833	0.034307	0.010868	0.212647	0	0.000579964	0.0465807	0	0	0.00574188	0.44	0.0421958	1.08384
GSM2899505	Pattern B	0	0.0377949	0	0.1006	0	0.116173	0	0.0329537	0.0429695	0	0	0.0149852	0.0640141	0	0.0104569	0.400735	0.0847917	0	0	0.0406002	0.00975688	0.0441686	0.31	0.057984	1.07278
GSM2899506	Pattern B	0	0.168456	0.0574262	0	0.00567423	0	0	0.126025	0	0	0.101647	0.0479464	0	0.0110611	0.00522868	0.374831	0	0	0	0.0728875	0	0.0288168	0.97	-0.0357416	1.10757
GSM2899508	Pattern B	0.0120965	0	0.0400739	0.032615	0	0.145017	0	0.0305463	0	0	0	0.0938005	0.0277949	0	0.00456162	0.523687	0.0111413	0	0	0.0646587	0	0.0140073	0.18	0.116516	1.06227
GSM2899509	Pattern B	0	0.0271101	0.00845428	0	0	0.104738	0	0.0690923	0	0	0.00119084	0.0102655	0.146077	0	0.0224032	0.168577	0	0.00530117	0	0.405759	0	0.0310323	0.25	0.0763055	1.08996
GSM2899511	Pattern B	0.125846	0	0.0225542	0.0490589	0	0.230378	0	0.0444878	0	0	0.0127407	0	0.0705036	0	0.0365832	0.288048	0.0385819	0.0109615	0	0.0292007	0.0253996	0.0156564	0.51	0.0325157	1.07136
GSM2899512	Pattern B	0	0.05861	0.0105253	0.0528984	0	0.136079	0	0.0301948	0.0222354	0	0.0681017	0.0140299	0.0196078	0	0.00562207	0.490643	0	0.00948909	0	0.0522082	0	0.0297557	0.19	0.112119	1.05496
GSM2899513	Pattern B	0	0.0464575	0.0148517	0	0	0.142205	0	0.0130543	0.101418	0	0.0109155	0.0372084	0	0.107125	0.045414	0.426055	0	0	0	0.0552956	0	0	0.28	0.068352	1.07868
GSM2899514	Pattern B	0	0.0633479	0.0261372	0.0322382	0	0.118626	0	0	0	0	0.0899033	0	0.1004	0	0	0.443601	0	0.0045879	0	0.0795003	0.0126251	0.0290338	0.24	0.0833845	1.06391
GSM2899515	Pattern B	0.0979793	0	0	0.0166343	0	0.125693	0	0.00762387	0.0851233	0	0.00163557	0.0525289	0.0164073	0.0554025	0.005087	0.42488	0	0.00165212	0.104197	0	0	0.00515557	0.2	0.105038	1.05026
GSM2899518	Pattern B	0	0.0150791	0.000159922	0.0518164	0	0.132113	0	0.0303978	0	0	0.0307874	0.0236918	0.01305	0.0218872	0.00561247	0.612661	0.00559094	0	0.0435365	0	0	0.0136171	0.05	0.251564	1.00451
GSM2899520	Pattern B	0.0312458	0	0	0	0	0.201024	0	0.0402561	0.0507975	0	0	0.0445232	0	0.180276	0.0582186	0.325299	0	0.0180658	0.0456594	0	0	0.00463406	0.07	0.180524	1.02596
GSM2899521	Pattern B	0.0461535	0	0	0.0433403	0	0.0494107	0	0.00557671	0.0454839	0	0.0141428	0.00709341	0.0979287	0.15278	0.0251815	0.345329	0	0	0.0588379	0.00323812	0.0451319	0.0603717	0.07	0.190285	1.0224
GSM2899524	Pattern B	0	0.00616319	0	0	0.0203079	0.0253533	0	0.0737681	0	0	0	0.0799921	0	0.259243	0.00480533	0.274933	0	0	0	0.250372	0	0.00506159	0.08	0.175546	1.06222
GSM2899525	Pattern B	0	0.073932	0.00288444	0.0330492	0	0.114346	0	0.0491187	0	0	0.06848	0	0.207025	0.0248828	0.0198364	0.288293	0	0	0	0.115436	0	0.00271594	0.62	0.0162008	1.08381
GSM2899529	Pattern B	0	0.0223611	0.0150087	0.00251057	0	0.237297	0	0	0.104964	0	0.0315437	0.0366494	0.015266	0.0569804	0.0148612	0.349221	0	0.00434309	0.0866247	0	0	0.0223697	0.26	0.0735708	1.06092
GSM2899534	Pattern B	0	0	0.0103098	0.0430667	0	0.171144	0	0	0	0	0.0475473	0	0.186961	0.0530556	0	0.384285	0	0.0127075	0.0254153	0.0423152	0	0.0231917	0.37	0.0515075	1.08294
GSM2899535	Pattern B	0.0704381	0	0	0	0	0.031856	0	0.0377219	0	0	0.000338389	0.0302025	0.084755	0.110482	0.0198722	0.451165	0	0	0.135003	0	0	0.0281666	0.06	0.190403	1.02511
GSM2899536	Pattern B	0	0.0219778	0	0	0	0.166911	0	0.00857702	0.0751083	0	0	0.0420709	0	0.304561	0.00379095	0.338107	0	0.0216397	0.0150428	0.00221376	0	0	0.05	0.237392	1.01844
GSM2899537	Pattern B	0.0994099	0	0	0	0	0.0630389	0	0.0213087	0.0290337	0	0	0.0447233	0	0.298776	0.0213772	0.383261	0	0	0.0390708	0	0	0	0.17	0.121411	1.08107
GSM2899541	Pattern B	0.120981	0	0	0.058381	0	0.0517338	0	0	0	0	0	0.100386	0.131296	0	0.0104737	0.438748	0.0563591	0	0.0120163	0.019625	0	0	0.8	-0.013211	1.11444
GSM2899545	Pattern B	0.0223533	0	0	0	0	0.125253	0	0.0312246	0.0402441	0	0	0.0450456	0	0.38211	0.00210157	0.246195	0	0	0	0.0920337	0	0.0134397	0.12	0.155316	1.07337
GSM2899613	Pattern B	0.0156647	0	0.00904202	0	0	0.285808	0	0.0582787	0.0715157	0	0.106345	0.054788	0.0932343	0	0.00934489	0.0777427	0	0	0	0.218237	0	0	0.25	0.0803987	1.08395
GSM2899614	Pattern B	0.0330917	0	0.0341548	0.055099	0	0.0593398	0	0.0364401	0.0229054	0	0.0847231	0.0204471	0.0295153	0	0.00093048	0.530611	0	0	0.0927417	0	0	0	0.29	0.0652926	1.0751
GSM2899615	Pattern B	0	0.124449	0.0630424	0	0	0.156787	0	0.138847	0.10608	0	0	0.107239	0.0865487	0	0.00983996	0.150032	0.054037	0	0	0.0030981	0	0	0.88	-0.0229899	1.10639
GSM2899616	Pattern B	0	0.0612164	0.0360585	0.00479384	0.100051	0	0	0.0228393	0.0169262	0	0	0.107466	0.0368164	0	0.0200055	0.244408	0.184008	0	0	0.165411	0	0	0.46	0.039798	1.07557
GSM2899623	Pattern B	0	0.0524579	0.00980005	0	0	0.254365	0.0334271	0.0511311	0	0	0	0.0607866	0.0611418	0.234266	0	0.225955	0	0.01305	0	0.00361946	0	0	0.62	0.0165393	1.10084
GSM2899625	Pattern B	0.0879025	0	0	0	0	0.0878307	0	0.0342253	0.056938	0	0	0.0108231	0	0.323727	0	0.308763	0	0	0.0897903	0	0	0	0.18	0.117553	1.07466
GSM2899627	Pattern B	0.0203925	0	0	0.0339386	0	0.24353	0	0.04575	0.0153674	0	0.0928547	0.0220651	0.0343874	0.280944	0.00721704	0.187017	0	0	0	0.0165357	0	0	0.25	0.0820997	1.08322
GSM2899634	Pattern B	0	0.100908	0	0	0	0.0301803	0	0.0849924	0.0226003	0	0.00454408	0	0	0.210711	0	0.43537	0	0.0303174	0	0.06785	0.0125277	0	0.15	0.137064	1.06557
GSM2899646	Pattern B	0.0385943	0	0	0.0176814	0	0.135372	0	0.0348391	0	0	0	0.0358942	0.146136	0	0.0363611	0.476113	0.000165828	0	0.0203535	0.0194337	0.00472557	0.0343301	0.29	0.0666184	1.08094
GSM2899651	Pattern B	0.0621565	0	0	0	0	0.136782	0	0.0353188	0.0627494	0	0.11758	0.0251701	0.0208214	0.304174	0	0.197238	0	0.00787796	0	0.0301329	0	0	0.38	0.0498992	1.09809
GSM2899719	Pattern B	0.0442014	0	0	0.00387359	0	0.236394	0	0.00163813	0.106051	0	0.121884	0	0.0416723	0	0.1074	0.212379	0.0554271	0	0.0641733	0	0.00490542	0	0.43	0.0450654	1.07268
GSM405210	Pattern B	0	0.16293	0.00956607	0.00306898	0.146122	0.0256026	0	0.079197	0	0	0	0.0799246	0.0698623	0	0.00852363	0.408104	0	0	0	0.00709961	0	0	0.78	-0.00524287	1.09947
GSM405215	Pattern B	0.00986355	0	0.00497389	0	0	0.278206	0	0.0393555	0.0329253	0	0.00201213	0.049875	0.0411011	0	0.0221458	0.399839	0.087664	0	0	0.0320384	0	0	0.29	0.0652779	1.07333
GSM405218	Pattern B	0.0931157	0	0.0392709	0.0554694	0	0.0489162	0	0.0377789	0	0.00866454	0	0.0324932	0.0306579	0	0.0400871	0.542223	0	0	0	0.0431353	0	0.0281878	0.01	0.296883	0.973018
GSM405220	Pattern B	0	0.014356	0.00678373	0	0.159926	0.0666385	0	0	0.0272896	0.00754857	0.0848307	0	0.00773637	0.146484	0	0.125965	0	0	0	0.190017	0	0.162424	0.17	0.120957	1.05918
GSM405230	Pattern B	0	0.0329739	0	0.0169717	0	0.193842	0	0.0412195	0	0	0.0698624	0.0153879	0.0631953	0.0888903	0.0533121	0.284938	0	0.074266	0.019187	0	0	0.0459538	0.24	0.0869926	1.05725
GSM405231	Pattern B	0.054912	0	0	0	0	0.156375	0	0.00689911	0.0713432	0	0.0766222	0	0.0295957	0.205706	0	0.203404	0	0	0	0.142451	0	0.0526919	0.24	0.0839881	1.06855
GSM405232	Pattern B	0	0.0133572	0	0	0	0.272135	0	0	0.029529	0	0	0.0668131	0.0429304	0	0.010678	0.27772	0.132822	0	0.154015	0	0	0	0.77	-0.00181929	1.07914
GSM405234	Pattern B	0.0328277	0	0	0.0643753	0	0	0	0.0388393	0	0	0	0.0559933	0.221554	0	0.00887109	0.269431	0.088303	0	0.179889	0.0399164	0	0	0.28	0.0692097	1.05761
GSM405239	Pattern B	0	0.0197448	0	0.0626704	0	0.0185404	0	0.0381365	0.0135631	0	0.00278117	0.0142085	0	0.380889	0	0.41226	0	0	0	0.0245606	0	0.0126457	0	0.721415	0.697896
GSM405242	Pattern B	0.0278842	0	0	0.00289644	0	0.107641	0	0.0057665	0	0	0	0.0439937	0.156263	0	0.0201859	0.371124	0.117487	0	0.0244323	0.112904	0.00942219	0	0.01	0.295301	0.969962
GSM405247	Pattern B	0	0.0225924	0.0083131	0.0606391	0	0.0399301	0	0.0983777	0	0	0	0.0651211	0.00356161	0	0.106607	0.489404	0	0	0	0.0875297	0	0.0179243	0.08	0.170182	1.0387
GSM405253	Pattern B	0.0523809	0	0.00968684	0.03674	0	0.0714327	0	0.0622499	0	0	0.0186477	0.0458007	0.160566	0	0.0141161	0.478813	0.0216973	0.00668749	0.00186721	0	0	0.019315	0.23	0.0901155	1.07104
GSM405254	Pattern B	0.0428757	0	0	0	0	0.134174	0	0	0.0484813	0	0.0565714	0.00886196	0.131271	0	0.0164104	0.321629	0	0	0.183217	0	0.000481165	0.0560268	0.2	0.106764	1.03806
GSM405257	Pattern B	0	0.16401	0	0.0830974	0	0.0100483	0	0.0958567	0	0	0	0.0973574	0.00643019	0	0	0.458059	0	0	0	0.0851411	0	0	0.89	-0.0241402	1.11771
GSM405260	Pattern B	0.0497085	0	0	0.0182867	0	0.124965	0	0	0.0215004	0	0.0243765	0.00627713	0.0653132	0.00108963	0.0165467	0.550219	0	0	0	0.0952958	0	0.0264209	0.14	0.138388	1.05504
GSM405262	Pattern B	0	0.0305399	0.0257521	0.0536167	0	0.19796	0	0.00204637	0.0472373	0	0	0.100402	0.033365	0	0	0.34778	0	0.00362455	0.136933	0	0.0207438	0	0.4	0.0489457	1.06735
GSM405267	Pattern B	0.187358	0	0	0	0	0.176456	0	0	0.0513165	0	0	0.166586	0.0359298	0	0.00174837	0.142587	0.0492361	0	0	0.177799	0.0109838	0	0.07	0.186762	1.03221
GSM405279	Pattern B	0.0270946	0	0	0	0	0.0905222	0	0.0615429	0.0709551	0.0168375	0	0	0	0.309294	0.00398999	0.225825	0	0.00829154	0	0.158371	0.00886539	0.01841	0.06	0.201457	1.03338
GSM405284	Pattern B	0.029905	0	0	0.075682	0	0.0457298	0	0.0507133	0	0	0	0.0569979	0.0620571	0	0.0045452	0.527154	0	0	0.138154	0.00906212	0	0	0.31	0.0598729	1.07891
GSM405285	Pattern B	0.0628627	0	0.0021088	0.00831947	0	0.0710583	0	0.0402996	0	0	0	0.0446997	0.0920348	0	0.0116488	0.499934	0	0	0.123243	0.0327946	0	0.0109959	0.12	0.151999	1.03657
GSM405286	Pattern B	0	0.0566804	0.0143843	0	0	0.0643656	0	0.0774343	0	0	0	0.0774803	0.0710255	0	0.0678611	0.355869	0.0864568	0	0	0.128443	0	0	0.26	0.0702006	1.06812
GSM405288	Pattern B	0.0421878	0	0.0370796	0.00837869	0	0.0542362	0	0.0385218	0	0	0	0.0273996	0.130573	0	0.00219449	0.41518	0.0394421	0	0	0.170906	0.0339009	0	0	0.370164	0.934582
GSM405289	Pattern B	0.0870364	0	0	0	0	0.0908251	0	0.0695108	0	0	0	0.0600698	0.196979	0	0.0485012	0.283062	0	0	0.159019	0	0.00499577	0	0.31	0.0574874	1.05672
GSM405292	Pattern B	0.0893562	0	0.00447957	0	0	0.112273	0	0.0544485	0	0	0	0.043356	0.190169	0	0.0310637	0.349999	0	0	0.124854	0	0	0	0.26	0.0706112	1.05735
GSM405293	Pattern B	0.0369019	0	0.0320042	0	0	0.00375001	0	0.0366236	0.0428134	0	0.132065	0	0.00141462	0.305313	0.00449977	0.269411	0	0	0	0.125085	0	0.0101176	0.01	0.289878	0.988051
GSM405299	Pattern B	0	0.0471987	0.0190939	0	0.087566	0.0348767	0	0	0	0	0.0980888	0	0.114778	0.179869	0.00284692	0.27762	0	0	0	0.0561755	0.0327065	0.0491799	0.31	0.0577348	1.08099
GSM405303	Pattern B	0	0.0523171	0	0	0	0.18408	0	0.0399297	0.0241094	0	0.0399717	0.0912114	0.159704	0	0.00113711	0.277005	0	0	0.107298	0	0	0.0232371	0.31	0.056897	1.06518
GSM405312	Pattern B	0	0.0117802	0.0100649	0.0413112	0	0.151035	0	0.0276985	0.0653432	0	0.017964	0.085317	0.0396669	0	0.0390658	0.421646	0.0834651	0	0.00510441	0	0	0.000537489	0.34	0.0541461	1.08064
GSM405316	Pattern B	0.0433741	0	0.0108684	0.00476564	0	0.14794	0	0.00131144	0.055636	0	0.00088149	0.0804671	0.0854096	0	0.00451709	0.507488	0	0.00145741	0.0271703	0.00571539	0.0229983	0	0.21	0.097584	1.0662
GSM405326	Pattern B	0.00310457	0	0.00864094	0.0359417	0	0.154358	0	0.0211972	0	0	0	0.0682002	0.0712577	0	0.00564027	0.276156	0.0487006	0	0	0.291373	0	0.0154302	0.22	0.0924547	1.07254
GSM405328	Pattern B	0	0.0611083	0.00635525	0.0615821	0	0.130455	0	0.0165214	0	0	0.0290656	0.0370895	0.0663734	0	0.0102075	0.33153	0.0305296	0.0181085	0.143891	0	0.0130256	0.0441573	0.15	0.133651	1.02504
GSM405329	Pattern B	0	0.0113396	0.0337714	0.0463827	0.0823258	0	0	0	0.0691085	0	0	0.108432	0.0168576	0.15251	0.00753515	0.39958	0	0	0	0.0721565	0	0	0.54	0.0283813	1.10773
GSM405330	Pattern B	0.0181171	0	0	0.0452562	0	0.0501383	0	0.00153049	0.0365513	0	0.0102178	0.0840585	0.0669472	0	0.0113273	0.320056	0.0745389	0	0	0.250519	0	0.0307427	0	0.306517	0.970276
GSM405335	Pattern B	0	0.0403482	0.00294648	0.137349	0	0.0575087	0	0.0189465	0.0758574	0	0	0.160011	0.0520345	0	0.019684	0.223908	0.0304245	0	0	0.161734	0.0192477	0	0.99	-0.0461385	1.14139
GSM405337	Pattern B	0.0631809	0	0	0.00722791	0	0.188459	0	0.0130251	0.0929552	0	0	0.0804661	0.0346758	0	0	0.350093	0.0652032	0.01111	0.0552703	0	0.00352421	0.0348098	0.34	0.0535458	1.06843
GSM405347	Pattern B	0.071898	0	0	0.00959746	0	0.240688	0	0.038358	0.0268202	0	0	0.0975557	0.0252285	0	0.00888768	0.249551	0.0196699	0.00418067	0.183114	0	0.0244515	0	0.52	0.0317777	1.06722
GSM405349	Pattern B	0	0.0646287	0.0468951	0	0	0.149456	0	0.133108	0.0156884	0	0	0.117506	0.0312757	0.113869	0	0.268116	0	0	0.0372043	0	0.0222521	0	0.61	0.0171381	1.08702
GSM405351	Pattern B	0.0112263	0	0.00394365	0.00749065	0	0.0734882	0	0	0.0101911	0	0.0121665	0.0189215	0.213093	0	0.00103863	0.500854	0	0.00462405	0.130887	0	0.00849846	0.0035776	0.01	0.286866	0.981682
GSM405352	Pattern B	0.147211	0	0	0	0	0.0801963	0	0.0316831	0.103723	0.0348131	0	0.0509379	0	0.168739	0.000245792	0.030458	0	0.0104735	0.341519	0	0	0	0.67	0.00689221	1.07101
GSM405355	Pattern B	0.00187627	0.0043027	0.00672668	0	0	0.123584	0	0	0	0	0	0.0592007	0.127453	0	0.00518554	0.374397	0.0792462	0.000979438	0	0.170265	0	0.0467827	0.1	0.160194	1.0393
GSM405363	Pattern B	0.00536994	0	0.00673265	0.0113749	0	0.0322916	0	0.0442971	0	0	0	0.0489575	0.273934	0	0	0.141561	0.0406909	0	0.066804	0.00293945	0	0.325046	0	0.373813	0.965763
GSM405364	Pattern B	0.01565	0	0	0.176025	0	0.0246135	0	0.036951	0.0368939	0.0142562	0.0556145	0	0	0	0.00583198	0.464422	0.0562692	0.00714698	0.0622595	0	0.0107443	0.0333219	0.21	0.0990559	1.0585
GSM405366	Pattern B	0.0264464	0	0	0.113925	0	0.060899	0	0.0605967	0.0065582	0	0	0.0579214	0.0168188	0.0127538	0.0113579	0.479157	0	0	0	0.153566	0	0	0.25	0.074155	1.0819
GSM405367	Pattern B	0	0.00314979	0.0546885	0.0343918	0	0.132193	0	0.00594202	0.0184793	0	0.0610781	0.00366909	0.108088	0	0.0571431	0.433016	0	0	0	0.0523144	0.00542445	0.0304218	0.2	0.107195	1.05285
GSM405368	Pattern B	0	0.0107882	0.00534653	0	0	0.0541395	0	0.0136872	0	0	0.011324	0.014485	0.109033	0	0.00183649	0.370142	0	0.00146086	0	0.407757	0	0	0	0.45794	0.896049
GSM405372	Pattern B	0.0747069	0	0.0520501	0.0159734	0	0.152938	0	0.0481358	0	0	0.0158955	0.0499221	0.0835339	0	0	0.500437	0	0.00640794	0	0	0	0	0.3	0.0636088	1.07781
GSM405382	Pattern B	0	0.215181	0	0.145497	0	0	0	0.0543112	0.0308871	0	0.00162913	0.0893561	0.0872485	0	0.00155547	0.351979	0.00213226	0	0.0127255	0.00749783	0	0	0.98	-0.0386473	1.11265
GSM405383	Pattern B	0.0540201	0	0	0	0	0.0958404	0	0.0429967	0	0	7.09735e-05	0.0316421	0.196855	0	0	0.308604	0.0204664	0	0.177551	0.0585726	0	0.0133811	0.06	0.19313	1.00711
GSM405387	Pattern B	0	0.0560437	0	0.00344402	0	0.0826642	0	0.010428	0	0	0	0.0596484	0.161937	0	0.00030873	0.422695	0.00182267	0	0.104577	0.0964313	0	0	0.14	0.138991	1.0427
GSM405388	Pattern B	0	0.106365	0.0210826	0.00263092	0.0150504	0.104537	0	0	0.104088	0	0	0.12678	0.0231444	0	0.0127113	0.347053	0.00663502	0	0	0.104927	0	0.0249947	0.64	0.0141053	1.09531
GSM405392	Pattern B	0.0725144	0	0.0718291	0.0590708	0	0.0402262	0	0.0647747	0	0	0.0169481	0.0234707	0.173789	0.0610404	0.00140984	0.244074	0	0	0.109327	0.0308355	0	0.0306898	0.53	0.0307621	1.06599
GSM405393	Pattern B	0.00057103	0	0.00580577	0.0119844	0	0.145919	0	0.0252603	0.0144409	0	0.0543634	0.0281345	0.119285	0	0.0256744	0.486485	0.0142843	0	0.0538536	0	0	0.0139381	0.39	0.0495346	1.08513
GSM405396	Pattern B	0.0477226	0	0	0	0	0.0328666	0	0.0145174	0.0190035	0	0	0.0323524	0.00227619	0.214532	0.00649935	0.269731	0	0	0	0.339499	0	0.0210001	0	0.50966	0.863182
GSM405399	Pattern B	0.116509	0	0	0.108234	0	0.0694449	0	0.123905	0	0	0	0.0644495	0.0903357	0	0.0339579	0.310752	0	0	0.0416143	0.0407974	0	0	0.82	-0.0150322	1.09415
GSM405400	Pattern B	0.0455039	0	0	0	0	0.152913	0	0.0107586	0.00247654	0	0.0243839	0.0249534	0.113484	0	0	0.287613	0	0.0062955	0	0.327519	0.00384079	0.000258962	0.21	0.103256	1.069
GSM405407	Pattern B	0.0933858	0	0.0216332	0	0	0.0452502	0	0.0648777	0	0.0209569	0	0.0379281	0.186606	0	0.0147296	0.397729	0	0	0	0.116904	0	0	0.06	0.210525	1.01019
GSM405410	Pattern B	0	0.0694915	0.00440489	0	0.082395	0.0186193	0	0.0462837	0	0	0.0178919	0.0162956	0.0232936	0	0	0.303118	0.123123	0	0	0.295084	0	0	0.78	-0.00419367	1.1073
GSM405417	Pattern B	0.122137	0	0	0.0210056	0	0.0190827	0	0.0427088	0	0	0.0254229	0.0163913	0.130841	0	0.0283054	0.42535	0	0	0.168755	0	0	0	0.09	0.164775	1.02225
GSM405426	Pattern B	0	0	0.0517237	0	0.00314671	0.0802621	0	0.144975	0	0	0.0118056	0.0322049	0.185287	0	0.0167483	0.440503	0	0	0	0.0333434	0	0	0.38	0.0501344	1.08278
GSM405431	Pattern B	0	0.00249467	0	0	0	0.112479	0	0.266047	0	0	0.0107217	0.0829241	0.0729068	0	0.0281359	0.392381	0	0	0.0319103	0	0	0	0.44	0.0422672	1.08915
GSM405434	Pattern B	0.0359082	0	0.0435706	0.0258659	0	0.0696239	0	0.0852778	0.0694508	0	0	0.168176	0.116906	0	0	0.349032	0	0	0.0361892	0	0	0	0.83	-0.0174843	1.11304
GSM405436	Pattern B	0	0.0846159	0.0334215	0	0.00386668	0.109876	0	0.0321595	0.102271	0	0.120429	0.0272847	0.0434859	0	0.00873464	0.208162	0	0	0.216724	0	0.0082161	0.000752812	0.62	0.0169258	1.06445
GSM405438	Pattern B	0	0.0813716	0	0	0	0.112159	0	0.0347967	0.0252242	0	0	0.0545284	0	0.0171534	0.0369202	0.365594	0	0.0130751	0.222458	0	0	0.03672	0.3	0.0624586	1.05196
GSM405460	Pattern B	0.0679478	0	0	0.00202193	0	0.131622	0	0	0.130743	0	0.0311698	0.0385579	0.0145333	0.182384	0.0127902	0.329018	0	0	0.0592131	0	0	0	0.14	0.139792	1.04225
GSM405465	Pattern B	0.0289385	0	0	0.0130986	0	0.130436	0	0	0.0428191	0	0.00569004	0.0530244	0.255893	0	0.000450563	0.38678	0	0	0.0723717	0	0.010498	0	0.2	0.108249	1.05762
GSM405467	Pattern B	0	0.103177	0.0305661	0.0817482	0	0.114923	0	0.0205329	0.130619	0	0.0287429	0.071094	0	0.126018	0.0168742	0	0.0686876	0	0.166588	0	0.0404305	0	0.73	0.0021116	1.07893
GSM405475	Pattern B	0.13481	0	0	0	0	0	0	0.320675	0	0	0	0.198083	0.0482848	0.169447	0	0.1287	0	0	0	0	0	0	0.99	-0.0489485	1.15205
GSM405476	Pattern B	0	0.0627717	0	0.109403	0	0.189154	0	0.0393261	0.0575356	0	0	0.100754	0.0426786	0	0.0249007	0.312044	0	0.00514232	0.0562896	0	0	0	0.86	-0.019859	1.10879
TCGA.02.2483.01A	Pattern B	0.015056	0	0	0.0361791	0	0	0	0.0440922	0	0	0	0.0532173	0.0201526	0.130428	0.0204054	0.439074	0.000155151	0	0	0.17444	0.0199578	0.0468414	0	0.431546	0.90827
TCGA.02.2485.01A	Pattern B	0.0180124	0	0.0128599	0.0765675	0	0.0372547	0	0.101202	0	0	0	0.0627009	0	0.0672622	0.0591986	0.445448	0	0	0	0.119494	0	0	0.09	0.161884	1.04023
TCGA.06.0129.01A	Pattern B	0.0578481	0	0.00671206	0.00299046	0	0.0212401	0	0.0487344	0	0	0	0.0344479	0.0520713	0	0.0193743	0.557047	0.061615	0	0	0.137919	0	0	0.01	0.286229	0.987259
TCGA.06.0130.01A	Pattern B	0.0301136	0	0	0.147531	0	0.00438236	0	0.0314113	0.00543778	0.0206214	0	0.0469481	0.0796825	0	0.0883363	0.452312	0.0620802	0	0	0.0260326	0	0.00511134	0	0.497814	0.866414
TCGA.06.0152.02A	Pattern B	0.0188696	0	0	0.0439186	0	0.110408	0	0.0341886	0.0474189	0	0	0.0504513	0.0133326	0.235858	0.109263	0.269827	0	0	0.0626847	0	0	0.00377958	0.09	0.165274	1.03911
TCGA.06.0157.01A	Pattern B	0	0.0270945	0.0108229	0	0.0395818	0.0309573	0	0.00605384	0.0308199	0.0584315	0	0	0	0.110111	0.0153596	0.588228	0	0	0.00652513	0.0393219	0	0.0366925	0.26	0.0737812	1.10699
TCGA.06.0158.01A	Pattern B	0	0.0199517	0.00435135	0	0	0.0644921	0	0.0320579	0.0660211	0	0.0457745	2.12535e-05	0	0.305567	0.00897284	0.388702	0	0	0.0152738	0.0252271	0	0.023588	0.06	0.213824	1.03773
TCGA.06.0174.01A	Pattern B	0.0427986	0	0	0	0	0.049344	0	0.0139042	0	0.044596	0	0	0	0.326382	0	0.435771	0	0.00962226	0.0366668	0	0	0.0409149	0.02	0.267371	1.02161
TCGA.06.0221.02A	Pattern B	0	0.0444756	0.0366436	0	0.0905609	0.0416783	0	0.025528	0	0	0	0.0689572	0.000390992	0	0.022665	0.536853	0.0364305	0	0.062598	0	0	0.0332185	0.25	0.0776124	1.07264
TCGA.06.0686.01A	Pattern B	0.0258333	0	0	0.00461935	0.0095541	0	0	0.0356537	0	0	0.0301259	0	0	0.30648	0.0177506	0.499316	0	0	0.00712533	0.0505828	0	0.0129593	0	0.424984	0.928424
TCGA.06.0747.01A	Pattern B	0	0.0893844	0.00160153	0	0	0.0673849	0	0.0864649	0.0728261	0	0.0878732	0	0.036362	0	0.00167518	0.336827	0.00221272	0.0139738	0	0.173854	0.00449267	0.0250679	0.63	0.015298	1.08318
TCGA.06.1804.01A	Pattern B	0	0.0129461	0.0206479	0	0.0435216	0.104344	0	0.011114	0.0588452	0	0	0.0755846	0.0361143	0.0523433	0.0953286	0.255858	0	0	0.139759	0	0	0.093593	0.23	0.0916265	1.04906
TCGA.06.2557.01A	Pattern B	0.036793	0	0.0148134	0.057885	0	0.0357734	0	0.0195136	0.00638203	0.0224084	0	0.0695463	0.0501503	0	0.0328193	0.563061	0.015129	0	0	0.0620231	0	0.0137023	0	0.398503	0.923653
TCGA.06.2558.01A	Pattern B	0.0483808	0	0	0.0715773	0	0	0	0.0504503	0	0	0.00734916	0.0316196	0.00818606	0.189862	0.0105511	0.448524	0	0	0.0688668	0	0	0.0646325	0	0.315087	0.971256
TCGA.06.2559.01A	Pattern B	0	0.0157217	0.00693033	0.0257381	0	0.0029053	0	0.0084053	0.0459221	0	0.130087	0	0.00791084	0.281206	0	0.426405	0	0.00664705	0	0.030987	0.00290458	0.00823036	0.06	0.202192	1.04786
TCGA.06.2563.01A	Pattern B	0.0394072	0	0	0.0810789	0	0.00453514	0	0.0549435	0.0069113	0	0	0.0248533	0	0.104344	0.0522875	0.501023	0	0	0.0875623	0	0	0.0430535	0.13	0.144039	1.05097
TCGA.06.2564.01A	Pattern B	0.0741429	0	0	0.0662942	0	0.060599	0.0132344	0.000318229	0	0	0.0799829	0.0141161	0.0291093	0	0.000828695	0.463985	0.038675	0	0.109345	0	0	0.0493694	0.3	0.0624749	1.06965
TCGA.06.2565.01A	Pattern B	0.0600577	0	0.0218957	0.0539522	0	0.0219928	0	0.0748042	0	0	0	0.0212792	0.00876191	0	0.0320098	0.569316	0.0480331	0	0.0566983	0	0	0.0311987	0.23	0.0901853	1.0734
TCGA.06.2567.01A	Pattern B	0.0257356	0	0	0.0349164	0	0.0680418	0	0.0223584	0	0	0	0.0895275	0.102852	0	0.010579	0.457033	0	0	0.0116072	0.0589056	0	0.118443	0.08	0.168747	1.04337
TCGA.06.2569.01A	Pattern B	0.146229	0	0.00134705	0.215206	0	0	0	0.041888	0.0113299	0	0	0.0560759	0	0.139039	0	0.38348	0	0	0	0.00359747	0	0.00180796	0.24	0.0882999	1.07374
TCGA.06.2570.01A	Pattern B	0.0272311	0	0	0.00433709	0	0	0	0.0270478	0	0	0.0122964	0.0134254	0	0.221859	0.0105585	0.549789	0	0	0.0758963	0	0	0.057559	0	0.474391	0.889505
TCGA.06.5408.01A	Pattern B	0.0175788	0	0	0	0.0036341	0.0312399	0	0.109021	0.0496129	0.130919	0	0.0613917	0	0	0.0142388	0.493884	0	0.00363714	0.056174	0	0	0.0286685	0.58	0.0231906	1.10091
TCGA.06.5413.01A	Pattern B	0.0715218	0	0	0.0720027	0	0.0760881	0	0.00176056	0	0	0.000742669	0.00464403	0	0.0503125	0.00574155	0.583671	0.013696	0	0.0452567	0	0	0.0745622	0.05	0.250937	1.00634
TCGA.06.5414.01A	Pattern B	0	0.0344745	0	0.0246096	0	0.0874817	0	0.00794554	0.0582443	0	0.102661	0	0.0191885	0.170788	0.0161751	0.345856	0	0.00452524	0	0.0698841	0.0168307	0.0413361	0.22	0.0924445	1.06925
TCGA.06.5416.01A	Pattern B	0.0638647	0	0.0210108	0.112743	0	0	0	0.0319913	0	0	0	0.0460031	0	0.316286	0.0305706	0.292154	0.0188658	0	0	0.0665112	0	0	0	0.31029	0.977563
TCGA.06.5417.01A	Pattern B	0	0.00193808	0.00783042	0.0511086	0	0.13763	0	0.0226996	0.00404781	0	0	0.0580109	0.0218956	0	0	0.534538	0.0460859	0	0.114215	0	0	0	0.17	0.121652	1.05448
TCGA.06.5856.01A	Pattern B	0.0202069	0	0.00245096	0	0	0.107615	0	0.027468	0.018406	0.0608479	0	0.0751982	0	0	0.00690037	0.553942	0	0	0.105069	0	0	0.0218946	0.26	0.0727775	1.08042
TCGA.06.5858.01A	Pattern B	0.00532945	0	0.000187595	0	0	0.0807037	0	0.0131131	0.00977025	0.0248458	0	0.0221511	0	0.263545	0	0.468352	0	0.00979722	0.00721077	0.0559761	0	0.0390187	0.01	0.298061	0.998559
TCGA.06.5859.01A	Pattern B	0.0189904	0	0.017811	0.0976475	0	0.107672	0.016673	0.0110703	0	0	0	0.00487418	0.061177	0	0.0246534	0.522407	0.0493535	0	0	0.0516352	0.0106515	0.00538411	0.06	0.202555	1.01887
TCGA.08.0386.01A	Pattern B	0.017344	0	0.0538706	0	0.00244045	0.108393	0	0.0992868	0.0110976	0	0.0162773	0	0	0.127817	0	0.380302	0	0.0243699	0.136703	0	0	0.0220982	0.22	0.0923964	1.05398
TCGA.12.0618.01A	Pattern B	0	0.0468053	0.0686532	0.0524374	0.0923909	0	0	0.0641163	0	0	0.0187769	0.0271198	0	0	0.00298482	0.572496	0.00513928	0	0.0207103	0	0	0.0283695	0.25	0.0750821	1.07821
TCGA.12.0619.01A	Pattern B	0.0479993	0	0.0106748	0.00783981	0	0.0973199	0.021986	0.0196597	0.00444135	0	0.0364802	0	0.0737108	0	0.00198114	0.568432	0.0015809	0	0	0.0236085	0	0.0842857	0.2	0.111439	1.07367
TCGA.12.0821.01A	Pattern B	0	0.0104724	0.00471366	0	0	0.106559	0	0.0315939	0.0542705	0	0.0475796	0	0	0.390344	0.00501889	0.318303	0	0	0.0311452	0	0	0	0	0.378392	0.948493
TCGA.12.1597.01B	Pattern B	0.0592652	0	0	0	0	0.134129	0	0.0321371	0	0	0	0.0781584	0.00305626	0.0429882	0	0.543369	0	0.00807607	0	0.0552371	0.0100895	0.0334946	0.06	0.213719	1.02083
TCGA.12.3650.01A	Pattern B	0.054439	0	0	0.124527	0	0	0	0.020133	0.058323	0	0.014417	0	0	0.125013	0.000290255	0.559705	0	0	0.0266404	0	0	0.0165123	0.05	0.238582	1.01527
TCGA.12.3653.01A	Pattern B	0.0409466	0	0	0	0	0.138855	0	0.0324949	0.035355	0.0847058	0	0.0559836	0	0	0.040481	0.359554	0	0.0152999	0.155716	0	0	0.0406079	0.2	0.110638	1.03956
TCGA.12.5299.01A	Pattern B	0	0	0.00274986	0.0166554	0	0.118987	0	0	0.0141812	0	0.0338014	0.0318592	0.148487	0	0.0378615	0.456005	0	0.00153649	0.0996033	0	0	0.0382724	0.39	0.0494955	1.08334
TCGA.14.0787.01A	Pattern B	0	0.035418	0	0.065513	0	0.0900905	0	0	0.0340115	0	0.0111065	0.00571838	0.017885	0.0796274	0.0398396	0.488464	0	0	0.0967894	0	0	0.0355365	0.21	0.102702	1.06344
TCGA.14.0790.01B	Pattern B	0	0.0661783	0.028519	0	0.0538802	0.00954601	0	0.0652544	0	0.0545872	0	0.12418	0	0.00987464	0.0634615	0.292629	8.21089e-05	0	0.222789	0	0	0.00901943	0.33	0.0559446	1.0591
TCGA.14.0871.01A	Pattern B	0.02356	0	0	0	0	0.176032	0	0.0798315	0.0638395	0	0	0.131057	0.022414	0.215045	0.0208065	0.172861	0	0	0.0945529	0	0	0	0.25	0.0805713	1.06989
TCGA.14.1825.01A	Pattern B	0	0.00419567	0.00744404	0.0194515	0	0.140188	0	0.0221429	0.031815	0	0.0368573	0.0296144	0.0120889	0.125571	0	0.504122	0	0	0.045371	0	0	0.0211387	0.07	0.182298	1.03712
TCGA.15.0742.01A	Pattern B	0.00958853	0	0.00157504	0	0	0.113129	0	0.0114404	0.0779963	0	0.178706	0	0.028253	0.136167	0	0.316749	0	0.0202957	0	0.0771184	0	0.0289818	0.29	0.0661577	1.08014
TCGA.19.1390.01A	Pattern B	0.0611464	0	0	0.0364276	0	0.0380136	0	0.0394077	0.0398431	0	0.0561076	0.0671707	0.0429392	0.0338639	0.0344351	0.408929	0.0216329	0	0.02085	0.0121769	0	0.0870567	0.69	0.00505595	1.10293
TCGA.19.1787.01B	Pattern B	0.000797731	0.0175872	0	0.0315962	0	0	0	0.0258984	0.0529822	0.015703	0	0	0	0.354265	0.0158901	0.357046	0	0.00262597	0.112812	0	0	0.012796	0.05	0.239414	1.02775
TCGA.19.2619.01A	Pattern B	0.0221509	0	0.00195624	0	0	0.205974	0	0	0.0860981	0	0.0929951	0	0.023415	0.189958	0	0.173249	0	0.0109294	0	0.18264	0	0.0106338	0.26	0.0723175	1.07446
TCGA.19.2624.01A	Pattern B	0	0.111935	0.0447473	0	0.0418389	0.108884	0	0.135472	0.0414855	0	0.13756	0.00712188	0.0495754	0.094088	0	0.130369	0	0.00581574	0	0.0911074	0	0	0.65	0.0125875	1.084
TCGA.19.2629.01A	Pattern B	0.0202571	0	0.00229232	0.0213653	0	0.109918	0	0.0210009	0	0	0.00764869	0.0273652	0.143017	0	0.0386458	0.481297	0.0630371	0	0.057899	0	0	0.00625717	0.05	0.236652	1.0015
TCGA.19.5960.01A	Pattern B	0.0447064	0	0.0702171	0.0627599	0	0	0	0.110176	0	0.0141498	0	0.0455032	0	0	0.0260417	0.493541	0	0	0	0.123073	0	0.00983189	0.54	0.0290615	1.09299
TCGA.26.5132.01A	Pattern B	0	0.0192111	0.0148704	0.066886	0	0.012532	0	0.0222692	0.0743249	0	0.0110154	0.00857564	0	0.129332	0.00351732	0.554142	0	0.00466059	0.0628682	0	0	0.0157948	0.13	0.143289	1.06266
TCGA.26.5133.01A	Pattern B	0.125136	0	0.0387776	0.159213	0	0	0	0.038654	0	0	0	0.0318589	0.0649793	0	0.0286903	0.387723	0.0779719	0	0.0456987	0	0	0.00129726	0.3	0.0606883	1.06317
TCGA.26.5134.01A	Pattern B	0	0	0	0.0164335	0	0	0	0.0478011	0.0159974	0	0.0181443	0.00727234	0	0.397012	0.039063	0.429045	0	0	0.0292314	0	0	0	0.06	0.215247	1.06978
TCGA.26.5135.01A	Pattern B	0.108534	0	0	0.0337275	0	0.0967844	0	0.00180687	0.0688878	0	0.0590141	0.0109116	0.0103266	0.280897	0.00549614	0.240367	0	0	0	0.0691921	0	0.0140545	0.05	0.225648	1.01103
TCGA.26.5139.01A	Pattern B	0.00312171	0	0	0.0621713	0	0.0134804	0	0.00185405	0.0437766	0	0.117727	0	0	0.198953	0.00466852	0.392223	0	0.00678194	0	0.137506	0	0.0177378	0.18	0.116026	1.07789
TCGA.27.1830.01A	Pattern B	0.0383359	0	0.0101612	0.0423335	0	0	0	0.0437849	0.0126131	0.00274248	0	0.0112174	0	0.271292	0.00276459	0.294741	0	0	0	0.222215	0.00465869	0.0431397	0.01	0.286487	0.99679
TCGA.27.2521.01A	Pattern B	0.0931843	0	0.00616005	0.0169168	0.0119682	0.0142239	0	0.0310824	0.0335294	0	0.0380199	0	0	0	0	0.555815	0.0944671	0	0.0803192	0	0	0.0243142	0.08	0.175338	1.03335
TCGA.27.2523.01A	Pattern B	0.065413	0	0	0.0796084	0	0	0	0.060676	0.00176205	0	0	0.0135853	0	0.293726	0.024109	0.392414	0	0	0.0687067	0	0	0	0.04	0.260613	1.00656
TCGA.27.2528.01A	Pattern B	0.0767114	0	0	0.0317705	0	0.120456	0	0.0200889	0.0305027	0	0.0252696	0.0220881	0.015535	0.297861	0.00691427	0.298915	0	0	0	0.0538873	0	0	0.02	0.275086	0.992962
TCGA.28.1747.01C	Pattern B	0.0110633	0	0.00385447	0.0472431	0	0.093715	0	0	0.00382196	0	0	0.0556763	0.138407	0	0.0538674	0.417682	0.0243449	0.00581263	0.132937	0	0	0.0115755	0.13	0.14345	1.03496
TCGA.28.1753.01A	Pattern B	0	0.0231607	0	0.0202714	0	0	0	0.0238905	0.0221308	0.0177051	0	0.0278925	0	0.406197	0.00621542	0.440723	0	0	0.00405138	0.0019123	0	0.00584975	0	0.715514	0.70031
TCGA.28.2509.01A	Pattern B	0.0286066	0	0.000274109	0.0109055	0	0.0821091	0	0.00337603	0.0785514	0	0.0653387	0	0.0493767	0	0	0.429928	0.066066	0.00467303	0.0823456	0	0.0565025	0.0419471	0.56	0.0255569	1.08206
TCGA.28.2514.01A	Pattern B	0.0567305	0	0	0.0023625	0	0.134654	0	0	0.0943075	0	0.0156615	0.0196928	0.0348744	0.145664	0	0.315066	0	0	0.138934	0	0	0.042053	0.21	0.103845	1.0485
TCGA.28.5204.01A	Pattern B	0.00558492	0	0.00150499	0.0332562	0	0.124829	0	0.00652925	0.0820065	0	0.091313	0	0.0379806	0	0.0352172	0.478055	0.00353323	0.00737013	0.0612957	0	0	0.0315248	0.47	0.0372894	1.08528
TCGA.28.5207.01A	Pattern B	0.0505687	0	0	0.0489815	0	0.0751919	0	0.00716559	0	0	0	0.080453	0.0167824	0	0.0297115	0.481875	0.033336	0	0	0.134761	0.0180127	0.0231609	0.06	0.213929	1.01633
TCGA.28.5208.01A	Pattern B	0.0347629	0	0.0295343	0	0	0.0096615	0	0.115468	0.0137791	0.0596986	0	0.0853553	0	0.0199742	0.00741237	0.440621	0	0.00611143	0.142498	0	0.00826926	0.0268545	0.13	0.149359	1.03015
TCGA.28.5209.01A	Pattern B	0.0152475	0	0	0	0	0.0768451	0	0.0285848	0.0319737	0.0585577	0	0	0	0.369171	0.0168444	0.308834	0	0.0108932	0	0.067782	0	0.0152661	0.06	0.206528	1.0486
TCGA.28.5215.01A	Pattern B	0.0716561	0	0.0176359	0.0525477	0	0.0486997	0	0.0202274	0.000641719	0	0	0.023807	0.011808	0.127299	0.00894795	0.43813	0	0	0	0.147407	0.0144409	0.0167516	0.05	0.247524	1.00288
TCGA.28.5218.01A	Pattern B	0.0236172	0	0.00317313	0.241944	0	0	0.0272778	0.0468035	0.04927	0.00253085	0	0	0.00855426	0.257098	0.0249743	0.304425	0	0	0	0	0	0.0103325	0	0.427993	0.90715
TCGA.32.1970.01A	Pattern B	0.00133159	0	0	0.0376077	0	0.0867623	0	0.0539022	0.0377343	0	0.0426309	0.0186723	0.0186326	0	0.00769916	0.512767	0	0.00534878	0.152861	0	0	0.0240508	0.24	0.0866694	1.06273
TCGA.32.2616.01A	Pattern B	0	0.0190989	0.00644824	0.0116069	0	0	0	0.014974	0.0889024	0	0.0701387	0	0.00157943	0.41742	0.00656244	0.329658	0	0	0.0225278	0.011083	0	0	0	0.299763	1.00393
TCGA.32.2632.01A	Pattern B	0	0.0323019	0.00995571	0.129694	0	0	0	0.0148893	0.0519709	0.031178	0	0.0542667	0.014639	0	0.0247908	0.543483	0	0	0.0703764	0	0	0.0224542	0.26	0.072916	1.07826
TCGA.32.2634.01A	Pattern B	0	0	0.000473616	0.0553743	0.0190686	0	0	0.0694696	0	0	0	0.035133	0	0.346889	0	0.409134	0	0	0	0.0642314	0	0.00022621	0.03	0.266317	1.02436
TCGA.32.2638.01A	Pattern B	0.0409536	0	0	0	0	0.14042	0	0.0354266	0.0430786	0.0675352	0	0.0566902	0	0	0.0705031	0.46126	0.00133155	0.000487551	0.0496072	0	0	0.0327064	0.34	0.0544976	1.07976
TCGA.41.3915.01A	Pattern B	0.0446463	0	0.0125883	0.12465	0	0	0	0.0323331	0.0444768	0	0.00112348	0	0	0.174428	0.00383657	0.381669	0	0	0	0.0240974	0	0.156151	0.07	0.184563	1.0414
TCGA.41.5651.01A	Pattern B	0.0875525	0	0	0.0312075	0	0.118257	0	0.0203545	0.0716215	0	0.0198535	0	0	0.331863	0	0.274789	0	0.0132547	0	0.0312461	0	0	0.05	0.227242	1.02085
TCGA.76.4925.01A	Pattern B	0	0.0073939	0.00752425	0	0	0.0704821	0	0	0.0904556	0	0.114278	0	0.0139057	0.23651	0	0.334394	0	0.00514035	0	0.110344	0	0.00957181	0.19	0.113935	1.07283
TCGA.76.4927.01A	Pattern B	0.0801229	0	0	0.0290513	0	0.106018	0	0	0.0565197	0	0.0612695	0.00094283	0.0149071	0.0410123	0.00555538	0.520142	0	0.00209427	0.0471199	0	0	0.0352448	0.25	0.0831177	1.07271
TCGA.76.4931.01A	Pattern B	0	0.0170165	0.00661434	0.0355998	0	0	0	0	0.0457071	0	0.113339	0	0	0.32577	0.00260879	0.297604	0	0	0	0.141569	0	0.0141718	0.16	0.12825	1.08647
TCGA.76.4932.01A	Pattern B	0.0452167	0	0	0.0217138	0	0.101611	0	0	0.0265682	0	0.100023	0	0.0444647	0	0.00573671	0.559587	0	0.00671513	0	0.059795	0	0.0285692	0.42	0.0475145	1.09699
TCGA.CS.4943.01A	Pattern B	0.0417085	0	0	0.0175607	0	0.111933	0	0	0.00243634	0	0	0.0462764	0.232861	0	0.0120225	0.315756	0.0271678	0	0	0.192276	0	0	0.07	0.188838	1.02403
TCGA.CS.5395.01A	Pattern B	0.0614567	0	0	0	0	0.170043	0	0	0.00224318	0	0	0.0743311	0.134702	0	0	0.302602	0.0179789	0	0.200763	0	0.0164962	0.0193842	0.31	0.0588426	1.05516
TCGA.CS.6186.01A	Pattern B	0.0441433	0	0	0	0	0.221412	0	0	0.0861513	0	0.0599574	0	0.0215864	0	0.0279315	0.343925	0.0063434	0	0.145496	0	0.0198873	0.0231666	0.43	0.0433216	1.06231
TCGA.CS.6188.01A	Pattern B	0.00323705	0.0188781	0	0.0247822	0	0.00230245	0	0.00396629	0.0511468	0	0	0.0203778	0	0.371249	0	0.387155	0	0.0132976	0.0921102	0	0	0.0114976	0.09	0.163879	1.08145
TCGA.CS.6668.01A	Pattern B	0.0735628	0	0	0	0.0167622	0.109058	0	0	0.116477	0	0.0964724	0	0.0310385	0	0	0.512751	0	0.037783	0	0	0.00609548	0	0.82	-0.015662	1.11411
TCGA.DB.5280.01A	Pattern B	0	0.076182	0.0277276	0	0.00684895	0.169228	0	0	0.118337	0	0.107384	0	0.0411469	0	0.0453601	0.337069	0.0124623	0	0.0401461	0	0.018108	0	0.17	0.1189	1.03672
TCGA.DB.A4XB.01A	Pattern B	0	0.0184115	0.0432493	0	0	0.0845928	0	0.0263337	0.00616011	0	0	0.046877	0.0755822	0	0.00337251	0.0910811	0.123558	0	0	0.47542	0.00536118	0	0.06	0.210469	1.03645
TCGA.DB.A4XC.01A	Pattern B	0	0.0533605	0.0148693	0.0429037	0	0.0968499	0	0	0.0649876	0	0.081841	0	0.0552765	0	0.00975638	0.508222	0.00121056	0	0.0459644	0	0.00386812	0.02089	0.16	0.127173	1.04751
TCGA.DB.A4XD.01A	Pattern B	0	0.0356105	0.0187419	0.0636781	0	0.16037	0	0	0.126495	0	0.0287266	0.0132709	0.0204189	0	0.00525226	0.477231	0.0104991	0	0	0.00497951	0.0296628	0.00506298	0.22	0.0917085	1.06567
TCGA.DB.A4XE.01A	Pattern B	0	0.0252941	0	0	0.0775578	0.0313635	0	0	0	0	0	0.0420757	0.344575	0	0	0.278474	0	0	0.20066	0	0	0	0.24	0.0870492	1.06506
TCGA.DB.A64Q.01A	Pattern B	0	0.0741501	0.00461025	0	0.0883399	0	0	0.0934695	0	0	0	0.0675303	0.207517	0	0	0.408104	0	0	0.0154855	0.0407934	0	0	0.32	0.0560414	1.07966
TCGA.DB.A64R.01A	Pattern B	0	0.115242	0.0397529	0	0.159961	0	0	0	0.00656527	0	0	0.0806593	0.0467212	0	0	0.339809	0	0	0	0.211289	0	0	0.66	0.0109368	1.09634
TCGA.DB.A64W.01A	Pattern B	0	0.194654	0.0228194	0.0729945	0.0652689	0	0	0.075585	0	0	0.060739	0.0667577	0	0	0	0.283492	0	0	0	0.15769	0	0	0.99	-0.0702709	1.12562
TCGA.DB.A75K.01A	Pattern B	0	0.0431982	0.00739368	0	0.0115626	0.0119786	0	0.044827	0	0	0	0.048115	0.320838	0	0.0115531	0.0322352	0.0617087	0	0	0.400704	0.00588607	0	0.19	0.112262	1.0866
TCGA.DH.5140.01A	Pattern B	0.00726695	0	0	0.122725	0	0.150931	0	0	0.0655355	0	0.109263	0.0295434	0.0620369	0.0052831	0	0.304987	0	0.0108727	0.131555	0	0	0	0.62	0.0158288	1.08752
TCGA.DH.A7UU.01A	Pattern B	0.0539964	0	0	0	0.0335884	0.0415066	0	0	0.00756086	0	0	0.0433854	0.237999	0	0	0.241254	0.0550353	0	0	0.285673	0	0	0.07	0.189744	1.02992
TCGA.DU.5847.01A	Pattern B	0.0431785	0	0	0.0228826	0	0.15027	0	0.0014663	0.0179571	0	0	0.0452436	0.112763	0	0.0654063	0.448508	0	0	0.0845714	0	0	0.00775244	0.42	0.0477907	1.07844
TCGA.DU.5852.01A	Pattern B	0.0582415	0	0	0.0469132	0	0.0827489	0	0.0115228	0.0019326	0	0	0.0300138	0.078654	0	0.0501408	0.544074	0.0130496	0	0.0531628	0.00468109	0	0.0248648	0.13	0.148479	1.04706
TCGA.DU.5874.01A	Pattern B	0	0.00855335	0.00709791	0.0860093	0.130514	0	0	0.040178	0.00270141	0	0	0.108333	0.0180392	0	0.0129231	0.380938	0.064626	0	0.140086	0	0	0	0.88	-0.0230469	1.09965
TCGA.DU.6392.01A	Pattern B	0.134283	0	0	0.0478623	0	0.0365146	0	0.00625423	0.0492563	0	0.00713602	0.0395058	0.000754817	0.19124	0.00485587	0.373046	0	0	0	0.0996051	0	0.00968687	0.05	0.231783	1.00995
TCGA.DU.6393.01A	Pattern B	0	0.0984331	0.0292962	0.0551445	0.0988699	0	0	0.15057	0	0	0.0188821	0.0612082	0	0	0.00637453	0.444314	0.0251173	0	0	0.0117901	0	0	0.8	-0.0123331	1.10581
TCGA.DU.6394.01A	Pattern B	0.0108632	0	0	0	0	0.182584	0	0.0213727	0.116055	0	0.162388	0	0.0657625	0.131352	0	0.190246	0.0883818	0	0	0	0	0.0309944	0.3	0.0612867	1.07475
TCGA.DU.6396.01A	Pattern B	0.0447763	0	0.00405694	0.0413188	0	0.0693662	0	0	0	0	0.0083583	0.013596	0.251685	0	0.0061568	0.497977	0	0	0.0627083	0	0	0	0	0.320902	0.966491
TCGA.DU.6400.01A	Pattern B	0.0127718	0	0	0.110696	0.053278	0	0	0.0570011	0.00784129	0	0	0.0981451	0	0	0.0414007	0.285437	0.256268	0	0	0.0693227	0	0.00783814	0.55	0.0272471	1.08508
TCGA.DU.6402.01A	Pattern B	0.0199518	0	0.0106008	0.124197	0	0.0717624	0	0	0.0116495	0	0.0426314	0	0.0210656	0.244457	0.024435	0.402818	0	0	0.0264319	0	0	0	0.21	0.103399	1.08168
TCGA.DU.6403.01A	Pattern B	0.0491308	0	0	0.014096	0	0.0749237	0	0.0196903	0	0	0	0.0466528	0.139997	0	0.0817869	0.356443	0.0876541	0	0.12659	0.00120983	0	0.00182581	0.12	0.150823	1.02794
TCGA.DU.6405.01A	Pattern B	0.0382423	0	0	0.0206019	0	0.184003	0	0	0.0231393	0	0	0.0786059	0.0366171	0	0.00655628	0.468485	0.0345894	0	0	0.0945202	0	0.01464	0.56	0.0261816	1.09851
TCGA.DU.6406.01A	Pattern B	0	0.00802596	0.00609781	0	0	0.101819	0	0	0.0459061	0.0363073	0	0.0411591	0	0.277327	0.0254106	0.349548	0	0.0179528	0.0904464	0	0	0	0.05	0.22854	1.01622
TCGA.DU.6410.01A	Pattern B	0	0.0652077	0.0120465	0.166718	0.116573	0	0	0.176471	0	0	0.0124274	0.103315	0.0357117	0.111564	0	0.137202	0	0.0282149	0.0345487	0	0	0	0.99	-0.0892082	1.15013
TCGA.DU.6542.01A	Pattern B	0	0.00245889	0	0.0165218	0.00736841	0.0531364	0	0	0	0	0.0106692	0.0227284	0.201512	0	0.00330916	0.504573	0.0952757	0	0.081334	0	0	0.00111261	0.05	0.252456	1.00423
TCGA.DU.7006.01A	Pattern B	0.010218	0	0	0.0824408	0	0.0219	0.0178695	0	0	0	0.0247489	0.0108461	0.14855	0	0.00288098	0.504794	0.0147662	0	0.141742	0	0	0.0192431	0.42	0.0459263	1.09042
TCGA.DU.7010.01A	Pattern B	0.00651447	0	0	0.0165598	0	0.0679077	0	0	0	0	0	0.0405506	0.229577	0	0.0543246	0.390027	0.0488723	0	0.145667	0	0	0	0.24	0.0891732	1.06557
TCGA.DU.7013.01A	Pattern B	0.0331043	0	0	0.164242	0	0	0	0.0395174	0	0	0	0.0383191	0.00345107	0	0.0357298	0.487913	0.10734	0	0.0815907	0	0	0.0087925	0.31	0.0599875	1.07688
TCGA.DU.7294.01A	Pattern B	0	0.049172	0	0.0320435	0.040035	0	0	0.0517908	0	0	0	0.0576319	0.122204	0	0.00197392	0.367994	0	0	0.222015	0	0	0.05514	0.44	0.0416193	1.06838
TCGA.DU.7298.01A	Pattern B	0.173902	0	0	0.0527765	0	0.143091	0	0	0	0	0	0.0403734	0.0383812	0	0.00855547	0.216815	0.0611945	0	0	0.234857	0.00579728	0.0242568	0.08	0.175047	1.02088
TCGA.DU.7299.01A	Pattern B	0.0386022	0	0.0131075	0	0	0.190252	0	0	0.0202825	0	0	0.0576322	0.0639398	0	0	0.431089	0	0.00365666	0.155157	0	0	0.0262813	0.16	0.126398	1.03714
TCGA.DU.7302.01A	Pattern B	0	0.0299405	0	0	0.32082	0	0	0	0	0	0	0.138032	0.12068	0	0.0370183	0.22798	0.012091	0	0.103409	0	0	0.0100285	0.97	-0.0351056	1.1089
TCGA.DU.8164.01A	Pattern B	0	0.108043	0.0461323	0	0.220215	0	0	0.0267104	0	0	0	0.120607	0.0232836	0	0	0.246836	0.00289814	0.00128962	0	0.194652	0.0093338	0	0.48	0.0365395	1.08706
TCGA.DU.8165.01A	Pattern B	0.0600953	0	0.0225924	0.0845801	0	0.00780684	0	0.0551762	0	0	0	0.0104604	0.0386629	0.0739262	0.0236265	0.55279	0	0	0	0.0622102	0	0.0080725	0.11	0.157837	1.05087
TCGA.DU.8166.01A	Pattern B	0.0175902	0	0.00462873	0.00214727	0	0.119148	0	0.00958946	0.0196708	0	0	0.0514188	0.0535676	0	0.00283218	0.0325839	0.048488	0	0	0.59657	0.0108537	0.0309111	0	0.468173	0.902519
TCGA.DU.8168.01A	Pattern B	0	0.125423	0.0357011	0.0637976	0.0893106	0	0	0.0020062	0	0	0	0.0973798	0.01268	0	0	0.400962	0.0864294	0	0	0.0863101	0	0	0.83	-0.0176989	1.10525
TCGA.DU.A5TP.01A	Pattern B	0.0304801	0	0.00130497	0.0308269	0	0.0174491	0	0.0247741	0	0	0	0.0567787	0.217063	0	0.00310829	0.343587	0	0	0	0.257766	0.0168621	0	0	0.346001	0.95364
TCGA.DU.A76L.01A	Pattern B	0.0391574	0	0	0.014604	0	0.00663825	0	0.0222773	0.00860401	0	0	0.0298753	0.0262207	0.384263	0.0186579	0.297202	0	0	0	0.127519	0	0.0249815	0	0.380362	0.954232
TCGA.DU.A7TA.01A	Pattern B	0	0.0193231	0.0167952	0.00675994	0.0110179	0.0226171	0	0.0216339	0	0	0.00133693	0.0378653	0.0604085	0	0.00271822	0.307067	0.0492548	0.00468058	0	0.43409	0	0.00443203	0	0.404076	0.929709
TCGA.DU.A7TD.01A	Pattern B	0.0763745	0	0	0.0264582	0	0.0920954	0	0.0291826	0.00575549	0	0	0.0853971	0.0567067	0	0.0488153	0.467129	0	0	0	0.0932611	0	0.0188251	0.22	0.0958386	1.06757
TCGA.DU.A7TJ.01A	Pattern B	0.00263536	0	0.00244813	0.0436212	0	0.144649	0	0	0.02989	0	0.0157269	0.0449869	0.10782	0	0.0136639	0.505713	0	0	0.0814654	0	0	0.00738078	0.47	0.0380417	1.0912
TCGA.E1.5304.01A	Pattern B	0	0.0807349	0.0346096	0.102017	0	0.159479	0	0	0.044982	0	0	0.0622057	0.0197129	0	0.0308742	0.410278	0.055106	0	0	0	0	0	0.79	-0.0060373	1.09919
TCGA.E1.5311.01A	Pattern B	0	0.036709	0.0262986	0.0637002	0.0144232	0.01799	0	0.0330954	0	0	0	0.0552243	0.0468975	0	0	0.412129	0	0	0	0.205048	0	0.0884843	0.6	0.01873	1.10614
TCGA.E1.5318.01A	Pattern B	0.139708	0	0	0.0108881	0	0.161849	0	0	0.0355108	0	0.151184	0	0.0635252	0	0	0.403928	0	0.0163603	0	0.0170464	0	0	0.53	0.0312131	1.08585
TCGA.E1.5322.01A	Pattern B	0.00917956	0	0.000983038	0.00441927	0	0.0519813	0	0	0	0	0.00418237	0.024378	0.295995	0	0	0.319663	0.113058	0.000570286	0	0.149572	0.0198368	0.00618212	0.01	0.297438	0.978645
TCGA.E1.A7YD.01A	Pattern B	0.0325736	0	0.0632611	0.0515627	0	0.089985	0	0.155429	0	0	0	0.12986	0.0115766	0	0.0260552	0.283028	0.0147858	0.00452186	0	0.114502	0.000396487	0.0224633	0.57	0.0243521	1.09039
TCGA.E1.A7YE.01A	Pattern B	0.0073085	0	0.00312956	0.0153233	0	0.0587495	0	0.0381403	0	0	0.00621485	0.0291808	0.167586	0	0	0.403408	0	0.0024076	0	0.181213	0.0873375	0	0.02	0.27586	0.985199
TCGA.E1.A7YI.01A	Pattern B	0.172237	0	0	0.015289	0	0.24999	0	0	0.0666145	0	0	0	0.0840647	0	0	0.379118	0	0.0132606	0	0	0.00677952	0.0126463	0.59	0.0210897	1.09191
TCGA.E1.A7YJ.01A	Pattern B	0	0.025067	0.010244	0.0899185	0	0.123618	0	0.00425214	0.0611604	0	0.0601266	0.016066	0.0691959	0	0.0326967	0.404196	0.00674606	0	0.0842256	0	0	0.0124871	0.25	0.0775187	1.05831
TCGA.E1.A7YL.01A	Pattern B	0.0475086	0	0	0.185154	0	0	0	0.0227655	0.0903737	0	0.0340664	0	0.128793	0	0	0.415864	0	0	0.048095	0	0	0.0273792	0.49	0.0351912	1.08418
TCGA.E1.A7YQ.01A	Pattern B	0.00165337	0.0055501	0.00301663	0	0	0.15357	0	0.00720954	0.0311271	0	0.0566575	0.0345738	0.126547	0	0.0461722	0.46892	0	0	0	0.0380467	0	0.0269564	0.08	0.171696	1.03307
TCGA.E1.A7YS.01A	Pattern B	0	0.110269	0.0234585	0.0190548	0	0	0	0.22073	0	0	0	0.1318	0	0	0	0.383109	0	0.0127958	0	0.0785462	0.00227099	0.0179658	0.98	-0.0423054	1.12251
TCGA.E1.A7YV.01A	Pattern B	0.142679	0	0.213558	0.0392239	0	0.000245396	0	0.0736775	0	0	0.0295819	0.0443486	0	0	0.0252029	0.133463	0.025343	0	0	0.148074	0	0.124602	0.61	0.0172353	1.09507
TCGA.E1.A7YW.01A	Pattern B	0	0.0381341	0.0119817	0	0.0361442	0.0390487	0	0.0157585	0	0	0.0212584	0.0523115	0.396309	0	0.0011988	0.200447	0	0	0	0.187408	0	0	0.21	0.0994144	1.07752
TCGA.EZ.7264.01A	Pattern B	0	0.0356046	0.0434696	0	0.0823934	0.0383491	0	0.0307979	0	0	0	0.129727	0.0496154	0	0	0.35595	0.0459451	0	0	0.188148	0	0	0.85	-0.0184515	1.11853
TCGA.FG.6691.01A	Pattern B	0.0344935	0	0	0.00222729	0	0.0557473	0	0	0	0	0.00397824	0.0209144	0.24866	0	0	0.542567	0	0.00382295	0.0558615	0.0317277	0	0	0	0.38465	0.936888
TCGA.FG.7634.01A	Pattern B	0.106846	0	0	0	0	0.14206	0	0.0213323	0.0132988	0	0.0582675	0	0.0178527	0.146998	0	0.411804	0	0	0	0.0494853	0.0231538	0.00890164	0.05	0.22354	1.00867
TCGA.FG.8182.01A	Pattern B	0	0.00415915	0.0034189	0.0303414	0.0559434	0	0	0	0.00993688	0	0.0138509	0.00442937	0.079127	0	0.00511784	0.115418	0.113539	0	0	0.555181	0.000699137	0.00883778	0	0.522209	0.857438
TCGA.FG.A4MU.01B	Pattern B	0.0465218	0	0	0	0	0.0704199	0	0.0207503	0.0285426	0.0160505	0	0.00660244	0	0.181654	0.0136356	0.564545	0	0.0107169	0.0168741	0	0	0.0236877	0.12	0.154224	1.07385
TCGA.FG.A4MW.01A	Pattern B	0	0.0292795	0.0119231	0	0.0469256	0.0589464	0	0	0.0675765	0.047986	0	0.0173816	0	0	0.0645412	0.276468	0.0776406	0	0.270091	0	0.027762	0.00347834	0.57	0.0243206	1.05768
TCGA.FG.A60K.01A	Pattern B	0	0.190355	0.0726418	0	0.125184	0.010908	0	0	0.116543	0	0.109655	0	0.0338744	0	0	0.252731	0	0	0.050936	0	0.0211552	0.0160166	0.63	0.0144876	1.07367
TCGA.FG.A87N.01A	Pattern B	0.0798785	0	0	0.114018	0	0.00208048	0	0.0418887	0	0	0	0.0509771	0.108791	0	0	0.519057	0	0	0.0723904	0	0	0.0109191	0.43	0.0444395	1.08969
TCGA.FN.7833.01A	Pattern B	0	0	0.0143512	0.0234503	0	0.065305	0	0.0264553	0	0	0	0.0425302	0.182422	0	0.0237392	0.2773	0.0214711	0	0	0.294632	0.0139714	0.0143724	0	0.333813	0.957142
TCGA.HT.7468.01A	Pattern B	0	0.060454	0.0257656	0.141002	0	0.0738134	0	0.0236481	0.0629278	0	0.0633813	0	0.0266366	0	0.0536805	0.213855	0.228187	0	0	0.0266485	0	0	0.43	0.0441331	1.06214
TCGA.HT.7469.01A	Pattern B	0	0.149091	0.0964129	0.0463982	0	0.0624609	0	0.0220579	0.0370599	0	0	0.0535854	0.0123882	0	0	0.303507	0.00295061	0.00524044	0.169161	0	0.0360897	0.00359673	0.52	0.031757	1.05794
TCGA.HT.7471.01A	Pattern B	0	0.0186582	0.00863313	0.056428	0	0.0542589	0	0.027128	0.0356556	0	0.00245755	0.055893	0.120398	0	0.0432687	0.463163	0.017476	0	0.0834512	0	0	0.0131312	0.05	0.228614	1.0004
TCGA.HT.7477.01B	Pattern B	0.0274009	0	0	0.0134659	0	0.0628401	0	0.0972074	0	0	0	0.0949838	0.137881	0	0.0726951	0.347463	0.0127135	0	0	0.107368	0	0.0259812	0.3	0.0606026	1.07869
TCGA.HT.7480.01A	Pattern B	0	0.187477	0.0594806	0	0.220017	0	0	0.0561624	0.00928678	0	0.119581	0	0.0115922	0	0.0202753	0.297626	0	0	0.0185016	0	0	0	0.8	-0.0117252	1.09196
TCGA.HT.7604.01A	Pattern B	0	0.0118525	0.0479483	0	0.0621508	0.0603461	0	0	0	0	0	0.0894167	0.0943676	0	0.00235053	0.450242	0.020443	0	0	0.159313	0	0.00156885	0.13	0.149789	1.04596
TCGA.HT.7606.01A	Pattern B	0.029527	0.0445097	0	0	0.0529738	0.0768135	0	0	0	0	0.0269922	0.0137819	0.166745	0	0	0.44731	0	0	0.141346	0	0	0	0.3	0.0619193	1.07138
TCGA.HT.7677.01A	Pattern B	0	0.0554044	0.0264902	0.0242589	0	0.0110669	0	0.0557178	0	0	0	0.0371269	0.0448461	0	0.00420427	0.114093	0.0185061	0	0	0.582581	0	0.0257046	0.06	0.199206	1.07253
TCGA.HT.7687.01A	Pattern B	0	0.0318153	0.0150393	0.093127	0	0.0740237	0	0	0	0	0	0.0474783	0.0190327	0	0.0220645	0.37785	0.139891	0	0	0.179678	0	0	0.15	0.137397	1.04294
TCGA.HT.7690.01A	Pattern B	0.018156	0	0	0.0674805	0	0	0	0	0.000533895	0	0.0209284	0.035799	0.122536	0.06711	0.0241811	0.560204	0	0	0.0830716	0	0	0	0	0.410527	0.919749
TCGA.HT.7858.01A	Pattern B	0	0.045796	0.0151295	0.0193037	0	0.0298369	0	0	9.62421e-05	0	0	0.0303775	0.0515451	0	0.0245603	0.26957	0.247141	0	0	0.259654	0	0.00698952	0	0.531729	0.848537
TCGA.HT.7860.01A	Pattern B	0	0.0289088	0.0101067	0	0	0.184642	0	0.0266588	0.0240641	0	0.0812953	0.0303825	0.0432598	0	0.0121028	0.429881	0.014446	0.0155678	0	0.0721785	0.00864912	0.0178558	0.31	0.0588704	1.07401
TCGA.HT.7873.01B	Pattern B	0.0106735	0	0.00197495	0	0.0414685	0.115093	0	0	0.0255107	0	0.0408111	0.0308094	0.0601159	0	0	0.35585	0	0.00419329	0.181054	0	0	0.132445	0.22	0.0943878	1.05272
TCGA.HT.7879.01A	Pattern B	0.0452555	0	0	0	0.0267706	0.103748	0	0	0.00959325	0	0	0.0899445	0.131505	0	0	0.46092	0.0284203	0	0	0.103739	0	0.000103901	0.07	0.185478	1.02977
TCGA.HT.8011.01A	Pattern B	0.0667453	0	0	0	0	0.17182	0	0	0.0849932	0	0.0118307	0.0193168	0.013535	0.259058	0.00133669	0.325882	0	0	0.0454828	0	0	0	0.17	0.121639	1.0636
TCGA.HT.8012.01A	Pattern B	0	0.117809	0.0611205	0.0173508	0.0961748	0	0	0	0.00374386	0	0	0.0880719	0.0234004	0	0.0130987	0.338322	0.0057971	0	0	0.215486	0.0111281	0.00849753	0.3	0.0643958	1.07464
TCGA.HT.8013.01A	Pattern B	0.0287105	0	0	0	0.00567798	0.0420789	0	0	0	0	0.00365334	0.0110845	0.367786	0	0.00358486	0.454372	0	0	0.0781865	0	0.00486562	0	0	0.416317	0.920098
TCGA.HT.8104.01A	Pattern B	0.0602008	0	0	0.0507289	0	0.120621	0	0.0721665	0	0	0	0.109739	0.0646034	0	0.0603114	0.367486	0.00615271	0	0.0879908	0	0	0	0.58	0.0227539	1.08297
TCGA.HT.A5RA.01A	Pattern B	0.0149667	0	0.00188616	0	0	0.0885046	0	0.0075333	0.059821	0	0.00209144	0.0394144	0	0.229023	0.105139	0.377684	0	0	0.0695526	0	0	0.00438439	0.18	0.114584	1.0749
TCGA.HT.A5RC.01A	Pattern B	0	0.0590451	0.00465081	0.0700463	0	0.0706147	0	0	0.078477	0	0.0100789	0.054856	0.00562769	0	0.0111194	0.463392	0.0207901	0.00182739	0	0.095294	0.0172372	0.0369434	0.56	0.0255807	1.09329
TCGA.HT.A619.01A	Pattern B	0	0.0868171	0.0845467	0.0875166	0	0.229536	0	0.186897	0	0	0	0	0.071988	0	0	0.183319	0.0295283	0.0398517	0	0	0	0	0.6	0.0184462	1.09159
TCGA.HT.A61C.01A	Pattern B	0	0.0164268	0	0.0889546	0	0	0	0.0537854	0	0	0	0.0267429	0	0.312957	0.0579654	0.333589	0	0	0	0.109579	0	0	0.05	0.243603	1.0231
TCGA.HW.7491.01A	Pattern B	0.0269501	0	0.00108192	0.0103144	0	0.270107	0	0	0.0597673	0	0.130307	0	0.063959	0	0	0.238267	0	0.0287017	0	0	0	0.170546	0.79	-0.00776922	1.11519
TCGA.HW.8319.01A	Pattern B	0	0.0464407	0.0192749	0	0.0131476	0.11257	0	0.0230135	0.109559	0	0.0423967	0.0201023	0.0517982	0	0.0076972	0.257952	0.0164064	0	0	0.241462	0.0100595	0.0281204	0.24	0.084685	1.0583
TCGA.HW.8322.01A	Pattern B	0	0.0315808	0.0140639	0.0143392	0.122743	0	0	0.0130654	0.0379938	0	0.0375446	0	0.0293803	0	0.0115511	0.445649	0.179039	0	0.0561072	0	0	0.00694338	0.25	0.0794795	1.0651
TCGA.KT.A7W1.01A	Pattern B	0	0.012214	0.0181626	0.0412002	0	0.263729	0	0.0383298	0.105736	0	0.0272517	0.107457	0.0419758	0.0953085	0.0514658	0.122986	0	0	0.0527225	0	0.0214616	0	0.46	0.0387465	1.09128
TCGA.P5.A5EU.01A	Pattern B	0.0253828	0	0.00414647	0.00921085	0	0.0206187	0	0.0112536	0	0	0	0.0615906	0.114051	0	0.0336165	0.55323	0	0.00619639	0.153702	0	0	0.00700115	0.05	0.252183	0.999265
TCGA.QH.A6CV.01A	Pattern B	0	0.0404864	0.00762727	0	0.0367693	0.125136	0	0	0.0553272	0	0.0883644	0.0150583	0.030254	0	0	0.380955	0.103491	0.0059022	0.0861074	0	0.0115964	0.012925	0.17	0.120998	1.03658
TCGA.QH.A86X.01A	Pattern B	0	0.0945825	0.0317451	0.11845	0.0904407	0	0	0	0	0	0	0.0608805	0.00960617	0	0.000258722	0.452881	0	0	0	0.141156	0	0	0.31	0.0584739	1.07917
TCGA.R8.A6ML.01A	Pattern B	0.0611752	0	0.140949	0.0513263	0.189553	0	0	0.0303087	0.0280074	0	0	0.0538388	0.0217761	0.036202	0.0178092	0.277575	0.091479	0	0	0	0	0	0.24	0.0870232	1.05137
TCGA.R8.A6MO.01A	Pattern B	0	0.0248157	0.0598601	0.133003	0	0.0630423	0	0	0.0324269	0	0.0146782	0.0376486	0.0418066	0	0.00545721	0.491417	0.0392033	0	0.0405911	0	0	0.0160496	0.25	0.0804943	1.06638
TCGA.RY.A83X.01A	Pattern B	0	0.103349	0.0271164	0	0.220613	0.0306089	0	0	0.105777	0	0.0638939	0	0.0299274	0	0	0.33691	0	0.0230824	0.0334475	0	0.021738	0.00353622	0.3	0.0620952	1.06287
TCGA.S9.A6TZ.01A	Pattern B	0	0.0448966	0.0300571	0	0	0.174067	0	0	0	0	0.0247752	0.0491797	0.093721	0	0.0538086	0.327281	0.0575728	0	0.0455874	0.0838076	0	0.0152459	0.07	0.18241	1.01101
TCGA.S9.A6U0.01A	Pattern B	0.0531604	0	0.011917	0.199351	0	0.0691966	0	0	0.00808977	0	0.0230219	0.0138659	0.0283828	0	0.0488173	0.388031	0.119008	0	0.0312585	0	0	0.00589942	0.26	0.0729339	1.06311
TCGA.S9.A6U1.01A	Pattern B	0.0187143	0	0	0.0406082	0	0.121974	0	0.00465503	0.0568231	0	0	0.113573	0.126973	0	0.00143302	0.274082	0.0285273	0.00141191	0	0.192302	0.00151475	0.0174083	0	0.393279	0.922949
TCGA.S9.A6U6.01A	Pattern B	0.00341176	0	0.00929978	0.0188976	0.022542	0.0524816	0	0	0.0426876	0	0	0.0638179	0.0576898	0	0.00458158	0.0796285	0.0583453	0	0	0.560159	0.00705037	0.019407	0.01	0.295235	1.01377
TCGA.S9.A6UA.01A	Pattern B	0.122668	0	0.0307892	0.109693	0	0.0219086	0	0.0343744	0	0	0	0.069605	0.105412	0	0.0113403	0.375091	0.0322792	0	0	0.062275	0.0105038	0.0140592	0.11	0.159191	1.02731
TCGA.S9.A6UB.01A	Pattern B	0	0.00280649	0.00504665	0.026008	0.0695322	0	0	0.19571	0	0	0	0.119824	0.204478	0	0	0.276938	0.0480026	0	0.0516547	0	0	0	0.8	-0.0110436	1.10326
TCGA.S9.A6WH.01A	Pattern B	0.0332824	0.0165885	0	0.0280098	0	0.0742005	0	0.0345155	0	0	0	0.12821	0.153054	0	0	0.442825	0	0	0.0595125	0	0	0.0298011	0.52	0.0323121	1.09699
TCGA.S9.A6WM.01A	Pattern B	0	0.0312484	0.0116151	0.0581014	0	0.105133	0	0	0.0824869	0	0.0727338	0.0727262	0.0567618	0	0	0.299512	0.0203351	0.017795	0.171552	0	0	0	0.53	0.0305574	1.07038
TCGA.S9.A6WO.01A	Pattern B	0	0.00529478	0.0239105	0	0	0.0952469	0	0	0.0243748	0	0.0203354	0.051897	0.243954	0	0	0.274392	0.0305975	0	0.0213879	0.198624	0	0.00998521	0.03	0.26436	0.987188
TCGA.S9.A7IS.01A	Pattern B	0.111286	0	0	0.0299778	0	0.0889857	0	0.102401	0	0	0	0.0963048	0.149836	0	0.0234167	0.364154	0	0	0.020179	0	0.0134589	0	0.57	0.0234478	1.08621
TCGA.S9.A7J0.01A	Pattern B	0.019813	0	0.04157	0	0.0355382	0.033174	0	0.0087914	0	0	0	0.0470979	0.207406	0	0.0150007	0.444992	0.0385712	0	0.104657	0.00338874	0	0	0.42	0.0463933	1.08633
TCGA.S9.A7J3.01A	Pattern B	0.027613	0	0.00413953	0	0.0948759	0.120012	0	0	0.0200622	0	0	0.152792	0.106468	0	0.015231	0.264411	0.0178177	0	0	0.170865	0	0.00571262	0.22	0.0952591	1.07095
TCGA.S9.A7R8.01A	Pattern B	0.0120749	0	0	0.00242012	0	0.188475	0	0	0.0499437	0	0.056597	0.0387062	0.0520144	0	0	0.509953	0	0	0.078579	0	0	0.0112362	0.08	0.16888	1.03176
TCGA.S9.A89Z.01A	Pattern B	0.00961278	0	0	0.0460377	0	0.0744835	0	0.00837945	0	0	0	0.0808624	0.173416	0	0.0140074	0.517477	0.00424905	0	0.0391563	0.0248429	0.00533767	0.00213787	0	0.360976	0.944119
TCGA.TM.A7C3.01A	Pattern B	0	0.159227	0.112793	0	0.150376	0	0	0.00629084	0.0248996	0.0714044	0	0.00636461	0	0	0.0572004	0.26688	0.00180929	0	0.142754	0	0	0	0.62	0.0168466	1.06533
TCGA.TM.A84B.01A	Pattern B	0.039264	0	0.0508519	0.0641988	0.011938	0.0373704	0	0.00549986	0.0502003	0	0	0.0677116	0	0.407601	0.0451299	0.182947	0	0	0.037287	0	0	0	0.13	0.144062	1.06776
TCGA.TM.A84G.01A	Pattern B	0	0.0586699	0.0548123	0	0.279512	0	0	0	0.0137422	0	0	0.155386	0.00360163	0	0	0.402099	0	0	0.0321769	0	0	0	0.97	-0.0360155	1.12296
TCGA.TM.A84H.01A	Pattern B	0	0.126087	0.0421517	0	0.12711	0	0	0.018814	0.0519262	0	0.0273977	0.0615574	0.110307	0	0	0.431691	0	0	0	0	0	0.00295742	0.46	0.0399206	1.08083
TCGA.TM.A84I.01A	Pattern B	0.0280443	0	0.109015	0.0943552	0	0.0920004	0	0.000672545	0.0131783	0	0	0.0392031	0.0581794	0	0.00363168	0.373029	0.0289958	0	0	0.156522	0.00177546	0.00139705	0.21	0.100096	1.05121
TCGA.TM.A84J.01A	Pattern B	0.248305	0	0.174871	0.0068945	0	0.0011282	0	0.0672802	0	0	0	0.017663	0	0.193196	0	0.22181	0	0	0.054633	0.0097669	0	0.00445216	0	0.380156	0.932538
TCGA.TM.A84M.01A	Pattern B	0	0.0739809	0.0262438	0	0.066889	0	0	0.0927598	0	0	0	0.0884719	0.0131957	0	0	0.0853718	0.108301	0	0	0.418291	0.0264952	0	0.15	0.134326	1.06937
TCGA.TM.A84Q.01A	Pattern B	0.0255859	0	0.00581243	0.026455	0	0.055087	0	0.00105028	0.00287002	0	0	0.0365734	0.257728	0	0.00133777	0.360722	0.0183334	0	0	0.188669	0.0127979	0.00697804	0	0.31754	0.966792
TCGA.TQ.A7RM.01A	Pattern B	0.00784603	0	0.034852	0.0776343	0	0.153656	0	0.00700837	0.0432265	0	0	0.133656	0.00987448	0	0	0.459074	0	0.0128991	0	0.0585695	0	0.00170383	0.91	-0.0264536	1.12902
TCGA.TQ.A7RO.01A	Pattern B	0	0.0922694	0.0467214	0	0.188186	0.0412188	0	0	0.0881694	0	0.0708578	0.00797263	0.0510366	0	0.00994573	0.216325	0.0251056	0	0	0.14766	0.0145316	0	0.43	0.0442708	1.06382
TCGA.TQ.A7RQ.01A	Pattern B	0	0.0692794	0.0152849	0.0367515	0.0530864	0	0	0.0896387	0	0	0	0.0599621	0	0	0	0.210689	0	0	0	0.465309	0	0	0.04	0.259067	1.01469
TCGA.VV.A86M.01A	Pattern B	0	0.030172	0.0185543	0.0409503	0	0.106327	0	0	0	0	0	0.0777648	0.121529	0	0.00441644	0.452607	0.0283789	0	0	0.113626	0	0.00567415	0.03	0.266121	0.988292
CGGA_1001	Pattern C	0.00595953	0.0101528	0.00528403	0.0834648	0	0	0	0.0489835	0	0	0	0.0258429	0.16259	0	0.0107809	0.280866	0.0567828	0	0	0.270408	0.0311764	0.00770823	0	0.325015	0.958093
CGGA_1004	Pattern C	0.0676402	0	0.035841	0.125046	0	0.0766052	0	0.0175433	0.0171126	0	0	0.0344408	0.0721199	0	0.0264869	0.402013	0.0118289	0	0.108493	0	0.00482867	0	0.12	0.152214	1.02278
CGGA_1019	Pattern C	0.0115541	0	0	0.0505592	0	0.00483033	0	0.0305466	0.0276661	0	0	0.0547709	0.0487709	0.0796633	0.0493844	0.34345	0.132001	0	0	0.166803	0	0	0.19	0.1134	1.06235
CGGA_1023	Pattern C	0	0.0659935	0.0196669	0.049015	0	0.0263319	0	0.174101	0	0	0	0.107701	0.0194217	0	0.00581287	0.321374	0	0.00384675	0	0.206736	0	0	0.35	0.0522721	1.08607
CGGA_1027	Pattern C	0	0.0114827	0.0343695	0.0985832	0	0.161144	0.0236364	0	0.0199851	0	0.0583834	0.00799469	0.042102	0	0.0308673	0.350764	0.049945	0	0	0.0597743	0	0.0509685	0.15	0.136523	1.0333
CGGA_1033	Pattern C	0	0.0410595	0	0.0715881	0	0.0809077	0	0.00722852	0.0579651	0	0	0.117985	0.198909	0	0	0.149445	0	0	0	0.274911	0	0	0.94	-0.0293264	1.13588
CGGA_1037	Pattern C	0	0.143589	0.0572766	0	0.130173	0.0802664	0	0	0.117602	0	0.0506129	0.0664887	0.0318646	0	0.010096	0.149683	0	0	0.162348	0	0	0	0.58	0.0230634	1.07055
CGGA_1046	Pattern C	0.00018866	0.0389079	0	0	0.027183	0.109378	0	0	0.113243	0	0.13036	0	0.369051	0	0	0.149152	0	0	0.0225351	0.0400009	0	0	0.17	0.118822	1.05356
CGGA_1051	Pattern C	0	0.0732368	0.0284071	0	0	0.197301	0	0	0.189039	0	0.0358242	0.0433674	0.0646217	0.0885428	0.0100625	0.0687197	0	0	0.190068	0	0.0108095	0	0.82	-0.0153184	1.0837
CGGA_1057	Pattern C	0.0319598	0	0.0359974	0.135033	0	0	0	0.014238	0.00495071	0	0	0.0571424	0	0.0389452	0.0234066	0.619738	0.013066	0	0.00257274	0.0151898	0	0.00776102	0.05	0.231939	1.01853
CGGA_106	Pattern C	0	0.0178752	0.0241003	0.0912161	0	0.0271855	0	0.0432911	0	0	0	0.0943091	0.115406	0	0.0117909	0.320107	0.106017	0	0	0.0941269	0.0258515	0.0287229	0	0.346923	0.94286
CGGA_1073	Pattern C	0.034947	0	0.00439809	0.0475031	0	0.0770268	0	0.00279756	0.0240658	0	0.0326321	0.0225586	0.0116708	0.201719	0.0160054	0.458786	0	0	0	0.0518395	0	0.0140501	0.15	0.135213	1.06953
CGGA_1077	Pattern C	0.005322	0	0	0.00675484	0	0.104926	0	0.029023	0.00462583	0	0.065179	0.00662141	0.171275	0.0681618	0.0033019	0.4039	0	0.00931789	0.00836972	0.0747766	0	0.0384457	0.23	0.0908696	1.07282
CGGA_1078	Pattern C	0.0127857	0.00132782	0	0.0561534	0	0	0	0.0452201	0.0226521	0	0	0.0171069	0.0373518	0	0.0325908	0.64124	0.00404598	0	0.0926496	0	0	0.0368758	0.07	0.182639	1.04347
CGGA_1079	Pattern C	0.0164507	0	0	0.0279896	0	0.0613347	0	0.0480222	0	0	0	0.0751188	0.0966895	0	0.00799846	0.327155	0.0773013	0	0	0.228284	0	0.0336556	0.03	0.264432	0.989033
CGGA_1081	Pattern C	0.0827709	0	0	0.197269	0	0.00824248	0	0.0928103	0.00351812	0	0	0.0429128	0.0556235	0	0.0564508	0.27315	0.131527	0	0	0.0485829	0	0.007142	0.45	0.040422	1.07059
CGGA_1116	Pattern C	0.0849061	0	0	0.0542629	0	0.0563123	0	0	0.000782766	0	0	0.0524268	0.0672032	0	0	0.419757	0.0799201	0	0	0.161002	0.00763308	0.0157938	0	0.321766	0.95916
CGGA_1121	Pattern C	0	0.0363037	0.0121112	0.00104419	0	0.107936	0	0	0.0265204	0	0.0148557	0.0534704	0.258619	0	0	0.156193	0.0305545	0.000888382	0	0.300569	0	0.000934494	0	0.313915	0.96608
CGGA_1126	Pattern C	0.0153601	0	0.0103724	0.0154949	0	0.0751901	0	0.0459388	0	0	0	0.0727751	0.126146	0	0.0518549	0.52728	0	0	0.0567548	0.00283325	0	0	0.13	0.145497	1.04892
CGGA_1127	Pattern C	0	0.149985	0.0312246	0.0248824	0.00902886	0.0789753	0	0	0.0495081	0	0.0333118	0.0519788	0.026685	0	0.012628	0.358331	0.00669289	0	0.165438	0	0	0.00133045	0.07	0.1882	1.00329
CGGA_1130	Pattern C	0.00964	0	0	0.0115083	0	0.0121343	0	0.0768437	0	0	0	0.0746017	0.122946	0.0486394	0.0119254	0.446978	0	0	0	0.184783	0	0	0.02	0.273731	0.993476
CGGA_1132	Pattern C	0	0.0822354	0.0170583	0.0299997	0	0.0623126	0	0.0110668	0.111042	0	0.100199	0	0.0279076	0	0	0.297043	0	0.0308999	0.178564	0	0.0336405	0.0180316	0.31	0.0594397	1.04661
CGGA_1139	Pattern C	0	0.127658	0.00789813	0.101885	0.00382131	0	0	0.0401165	0	0	0.0553874	0	0.218438	0	0.00460678	0.249427	0	0	0.190762	0	0	0	0.12	0.154165	1.01613
CGGA_1140	Pattern C	0	0.0341501	0.00112394	0.0594109	0	0.122598	0	0	0.00849564	0	0	0.105278	0.11934	0	0	0.335904	0.00470555	0	0	0.208993	0	0	0.09	0.166136	1.03857
CGGA_1141	Pattern C	0	0.00547889	0.00384548	0.00566963	0	0.0783913	0	0.0534816	0	0	0	0.0537368	0.181193	0	0.0146428	0.298153	0.00399493	0	0	0.301412	0	0	0.56	0.0263791	1.11027
CGGA_1144	Pattern C	0.0526895	0	0	0.100956	0	0.0474409	0	0.0454638	0	0	0	0.0461102	0.0393097	0	0.0214306	0.322895	0.0622229	0	0	0.246981	0	0.0145003	0.65	0.0121883	1.09899
CGGA_1148	Pattern C	0.0203274	0	0.00953788	0.0119833	0	0.0713336	0	0.0118465	0	0	0	0.0560045	0.105309	0	0.0176059	0.423718	0.1239	0	0	0.134912	0	0.0135206	0.21	0.0974411	1.06884
CGGA_1152	Pattern C	0.0366386	0	0.0452001	0.0710506	0	0.0734416	0	0.0210392	0.0394729	0	0	0.0752069	0.0962974	0	0.0129556	0.46485	0	0	0	0.0628277	0	0.00101919	0.05	0.221113	1.00574
CGGA_1155	Pattern C	0	0.158585	0.0514941	0.00897574	0.048227	0.0159868	0	0.000776426	0.0576805	0	0.153442	0	0.0289491	0	0	0.422017	0	0.0330549	0	0.0040108	0.0168004	0	0.17	0.121201	1.04235
CGGA_1157	Pattern C	0	0.0231951	0.00739541	0	0	0.163226	0	0.0168573	0.0630372	0	0.0850205	0.0374357	0.0616579	0	0.00250916	0.455736	0	0	0	0.0656809	0	0.0182486	0.26	0.0726893	1.07442
CGGA_1159	Pattern C	0.0182471	0	0	0.00130875	0	0.0410854	0	0.0209841	0.0118927	0	0	0.031663	0.111794	0	0.0103177	0.17606	0.0941361	0	0	0.482512	0	0	0	0.316156	0.984525
CGGA_1161	Pattern C	0	0.0351388	0.0021988	0.00782044	0	0.0469189	0	0.0334312	0.011212	0	0	0.118405	0.185549	0	0	0.306453	0	0	0	0.252873	0	0	0.25	0.0777736	1.09074
CGGA_1162	Pattern C	0	0.0771407	0.0270509	0	0.0387695	0.064771	0	0	0.0497378	0	0	0.109778	0.131876	0	0.0137414	0.327887	0	0	0	0.159248	0	0	0.16	0.126727	1.04712
CGGA_1169	Pattern C	0.0299485	0	0	0.0146439	0	0.12062	0	0.0139229	0	0	0.00337565	0.0182577	0.30037	0	0.0239853	0.269845	0	0	0.178685	0.0263471	0	0	0.09	0.162362	1.02454
CGGA_1171	Pattern C	0.0583454	0	0.0231549	0.0291841	0	0.0456319	0	0.00376168	0	0	0	0.0236696	0.170412	0	0.0151261	0.50979	0	0	0.106285	0	0.000566816	0.0140728	0	0.329625	0.957392
CGGA_1177	Pattern C	0	0.0117867	0.00383875	0.0526727	0	0	0	0.0261505	0	0	0.015308	0	0.0778313	0.239838	0.013158	0.27702	0	0	0	0.132968	0.00929379	0.140134	0	0.405956	0.926875
CGGA_1181	Pattern C	0	0.0340855	0.00408911	0.031383	0	0	0	0.0123724	0	0	0.0119674	0.00974404	0.143578	0.00780625	0.0270886	0.584022	0	0	0.113717	0	0	0.0201464	0	0.317636	0.971813
CGGA_1184	Pattern C	0	0	0.00506194	0.0232396	0	0.253411	0	0.0171397	0.0662165	0	0.0295852	0.0538268	0.0691614	0	0	0.287059	0.0121377	0.00560355	0.163474	0	0.0120113	0.00207147	0.36	0.0520446	1.0635
CGGA_1188	Pattern C	0	0.112222	0.0454711	0.105944	0	0.0291981	0	0.0347797	0.0150693	0	0	0.107117	0	0.0585419	0.00539125	0.446525	0.00444998	0	0.0307432	0	0	0.00454801	0.05	0.233808	0.999996
CGGA_1195	Pattern C	0	0.0789016	0.0257602	0.0177886	0	0.133195	0	0.0317275	0.0378075	0	0	0.0976941	0.0123945	0.0380356	0.0278741	0.423831	0.0149787	0	0	0.0451989	0	0.0148121	0.26	0.0730195	1.07055
CGGA_1207	Pattern C	0	0.0910731	0.0258627	0.00598383	0.0417442	0.0111856	0	0.00425238	0.107617	0	0.151658	0	0.0304499	0	0	0.264897	0	0.0334368	0.203924	0	0.0270215	0.000894237	0.46	0.0402926	1.05318
CGGA_1216	Pattern C	0.000834216	0.0111685	0.00630626	0.06028	0	0.0781328	0	0.00511798	0.0503125	0	0	0.0799708	0.202871	0	0.00649216	0.380092	0	0.00772933	0.0798401	0	0.0308527	0	0.52	0.0313244	1.08479
CGGA_1224	Pattern C	0.0467771	0	0.0257206	0.0919854	0	0.0395354	0	0.0347679	0.00662484	0.011462	0	0.0740227	0.197868	0	0.0159857	0.390675	0	0	0.0358045	0.000337044	0.0284349	0	0.15	0.132635	1.0423
CGGA_1228	Pattern C	0.0250913	0	0	0.0344776	0	0.31037	0	0.00604726	0.0478098	0	0	0.078073	0.0362415	0	0	0.400188	0.00707764	0.00580322	0.0483535	0	0	0.000467653	0.24	0.0865724	1.06836
CGGA_1231	Pattern C	0.0844459	0	0.0280557	0.184228	0	0	0	0.0795933	0	0.00143271	0	0.0993373	0.0311581	0	0.0299864	0.341416	0.0457725	0	0.00551613	0.0213581	0.00989695	0.0378026	0.05	0.238686	0.993019
CGGA_1256	Pattern C	0	0.00808786	0.0114937	0.22328	0.0311453	0	0	0.0838374	0	0	0	0.0717263	0.0888004	0	0.00496763	0.372444	0	0	0	0.100137	0	0.00407981	0.3	0.0600537	1.08026
CGGA_1260	Pattern C	0	0.0617709	0.0279081	0.0829822	0	0.0253945	0	0.00630557	0.0436542	0	0.0785973	0.0952496	0.0501891	0	0	0.362966	0.02578	0.00265965	0	0.124674	0.0111488	0.000720768	0.47	0.0376457	1.09195
CGGA_1263	Pattern C	0	0.0450005	0.0123629	0.0332424	0	0.094295	0	0.0392361	0.00893016	0	0.0171795	0.0472063	0.0195145	0	0	0.529596	0	0.0105323	0.142904	0	0	0	0.09	0.165911	1.02855
CGGA_1270	Pattern C	0.0330113	0	0.0333234	0.204532	0	0	0	0	0.0712333	0	0	0.0278708	0.0476289	0	0.0146944	0.414323	0.0779105	0	0.039179	0.0333951	0	0.00289756	0.29	0.0650016	1.06597
CGGA_1281	Pattern C	0.0592413	0.00281314	0	0.204768	0	0.116026	0	0	0.109991	0	0	0.146205	0.0495149	0	0	0.215365	0	0	0.0457345	0	0.0179283	0.0324126	0.19	0.113811	1.06841
CGGA_1285	Pattern C	0.000959167	0	0.0413921	0.0715434	0	0.0542769	0	0.0842239	0	0	0	0.079928	0.0796219	0	0.000549412	0.277479	0.0910167	0	0	0.219009	0	0	0.2	0.110774	1.05266
CGGA_1286	Pattern C	0.000436551	0	0.00504198	0.119836	0	0	0	0.0757717	0	0	0	0.0959892	0.227099	0	0.00506744	0.360618	0	0	0.0691461	0.0409942	0	0	0.09	0.162406	1.03307
CGGA_1291	Pattern C	0	0.0877817	0.121603	0	0.105303	0.0528576	0	0.0258899	0.100778	0	0.148174	0	0.02253	0	0.00840558	0.267304	0.0454975	0	0.00815149	0	0.00572439	0	0.46	0.0398767	1.06876
CGGA_1301	Pattern C	0.0168505	0	0.0215759	0.0897942	0	0.00563205	0	0.0177826	0	0	0	0.0723909	0.0706524	0	0.0370459	0.341777	0.189504	0	0	0.0941908	0	0.042804	0.1	0.15999	1.03097
CGGA_1305	Pattern C	0	0.0449607	0.0138132	0.0225175	0	0.0574206	0	0.00814771	0.01562	0	0.00587317	0.0336341	0.129363	0	0.00180352	0.277103	0.00789793	0	0	0.381846	0	0	0	0.414201	0.917077
CGGA_1309	Pattern C	0	0.107561	0.0535366	0.0754436	0	0.0687541	0	0	0.0485433	0	0	0.0790976	0.0276619	0	0.0268216	0.331892	0.0852111	0	0.0884804	0	0	0.00699674	0.2	0.110507	1.03518
CGGA_1311	Pattern C	0.0327613	0	0	0	0.00309451	0.110834	0	0	0	0	0	0.0388007	0.102763	0	0.0344948	0.463576	0.0137359	0	0.170702	0	0.0236241	0.00561356	0.5	0.0341547	1.08212
CGGA_1319	Pattern C	0	0.123556	0.00669469	0.0212171	0	0.102964	0	0	0.0122918	0	0	0.0596521	0.206604	0	2.54595e-05	0.328549	0	0	0.138446	0	0	0	0.2	0.111359	1.04066
CGGA_1330	Pattern C	0.00836738	0	0.0132145	0.0588753	0	0.0485045	0	0	0.0141045	0	0	0.0278842	0.250902	0	0.0218299	0.36445	0.0273284	0	0.14745	0	0.0170895	0	0.06	0.199856	1.01191
CGGA_1335	Pattern C	0.0355987	0	0	0.0511508	0	0.178052	0	0	0.0757811	0	0.0189569	0.0603599	0.0441664	0	0	0.0730771	0.153275	0	0	0.303014	0	0.00656852	0.13	0.144821	1.04307
CGGA_1337	Pattern C	0	0.0376374	0.00897409	0.184839	0	0.0599956	0	0.000929798	0.0486891	0	0.0179651	0.0609944	0.0353546	0	0.002745	0.521646	0.0182118	0	0	0	0.00201865	0	0.13	0.149428	1.04862
CGGA_1345	Pattern C	0	0.0633121	0.0282954	0.027776	0	0.0280597	0	0.00784152	0.0114576	0.00115442	0	0.0551338	0.0821915	0	0.0263422	0.427352	0.220818	0	0.00405206	0.00991193	0	0.00630212	0	0.320568	0.959749
CGGA_1356	Pattern C	0	0.0270444	0	0	0	0.0951721	0	0	0	0	0	0.0197132	0.157162	0	0.0144688	0.190545	0.0825493	0	0	0.413345	0	0	0.21	0.103286	1.08405
CGGA_1369	Pattern C	0	0.0833035	0.0342575	0.00793001	0	0.122049	0	0.0393369	0.0192993	0	0.0102886	0.0650501	0.114672	0	0.00518333	0.270608	0	0	0.168579	0.0416615	0	0.0177819	0.07	0.186047	1.00212
CGGA_1371	Pattern C	0	0.0402268	0.0302859	0.0507865	0.00240446	0	0	0.00685503	0.0631898	0	0.0053886	0.0587451	0.0213395	0.0426963	0.0125936	0.416326	0	0	0	0.235779	0	0.013383	0.06	0.209928	1.02066
CGGA_1383	Pattern C	0.0390987	0	0	0.112932	0	0.011579	0	0.0556617	0	0	0	0.07192	0.182858	0	0	0.434898	0.0170344	0	0	0.0690593	0	0.00495905	0.25	0.0761367	1.07788
CGGA_1386	Pattern C	0	0.111832	0.0487765	0.0408674	0	0.0653567	0	0	0.0961606	0	0.0934953	0.0053455	0.0536279	0	0.0170749	0.289778	0.101574	0	0.0476399	0.00468168	0	0.0237896	0.08	0.178878	1.00641
CGGA_1389	Pattern C	0.0787228	0	0.0699657	0.198799	0	0	0	0.0981849	0	0	0	0.081481	0.0517881	0	0	0.335863	0.0129481	0	0	0.0562017	0	0.0160453	0.62	0.0161227	1.08822
CGGA_1390	Pattern C	0.0830729	0	0	0.0233174	0	0.209817	0	0.0093389	0.108579	0	0	0.0299745	0.0395257	0	0.000417285	0.39035	0	0.0105504	0.0950574	0	0	0	0.61	0.017878	1.08347
CGGA_1392	Pattern C	0	0.0611129	0.0218999	0.021231	0	0.0370323	0	0	0.065636	0	0.0420922	0	0.0736354	0	0	0.474272	0.124628	0	0	0.070436	0	0.00802407	0.16	0.129643	1.04983
CGGA_1400	Pattern C	0	0.112071	0.0496627	0.122009	0	0.0584954	0	0.00800023	0.0447425	0	0.0277456	0.11431	0.0331916	0	0.0101263	0.381076	0.0385698	0	0	0	0	0	0.65	0.0126858	1.09655
CGGA_1404	Pattern C	0	0.0700738	0.0143905	0	0	0.158927	0	0.0169112	0.126055	0	0.096938	0	0.0416372	0	0.0199738	0.183682	0.0550056	0	0.192706	0	0.0236998	0	0.12	0.151999	1.01196
CGGA_1407	Pattern C	0	0.214917	0.0741647	0	0.123395	0	0	0	0.104563	0	0.0334458	0.0430247	0.0399235	0.0670355	0.0217589	0.160771	0	0	0.115227	0	0	0.00177425	0.25	0.0799953	1.04402
CGGA_1411	Pattern C	0.0637337	0	0.0215952	0.0269797	0	0.0338244	0	0.0121965	0.00392398	0	0	0.0341397	0.118852	0	0.0283642	0.413042	0.219735	0	0.0038632	0.0110637	0	0.0086869	0.06	0.200361	1.01846
CGGA_1416	Pattern C	0	0.0861364	0.0310484	0.0446244	0	0.0147461	0	0	0.0219343	0	0	0.0795231	0.0384976	0	0.0143261	0.304393	0.106456	0	0	0.244092	0.0142222	0	0.08	0.173196	1.02929
CGGA_1420	Pattern C	0.0443336	0	0	0.0258922	0	0.085598	0	0.036672	0.0270459	0	0	0.115253	0.0200605	0	0.0268799	0.148198	0.0611517	0	0	0.226986	0	0.18193	0.37	0.0520006	1.09915
CGGA_1421	Pattern C	0	0.0489686	0.0106058	0.153726	0	0.0234417	0	0.00272159	0.0378195	0	0.0344109	0.0504227	0.221517	0	0.00259583	0.123221	0.0103161	0	0	0.280234	0	0	0.22	0.0957722	1.06783
CGGA_1427	Pattern C	0	0.0566712	0	0	0	0.103055	0	0	0.0130144	0	0	0.035388	0.237349	0	0.0129145	0.382971	0	0	0.158636	0	0	0	0.09	0.162698	1.02762
CGGA_1431	Pattern C	0	0.0640577	0.00806541	0.00829066	0	0.100469	0	0	0.0157609	0	0.0358131	0.0728331	0.231951	0	0.00455372	0.372016	0	0	0	0.0818727	0	0.00431635	0.06	0.216507	1.01035
CGGA_1437	Pattern C	0.0380818	0	0	0.0612699	0	0.0934398	0	0	0.00964566	0	0	0.0503266	0.175622	0	0.0130097	0.300741	0.00809494	0	0	0.249769	0	0	0.12	0.152983	1.04152
CGGA_1441	Pattern C	0	0.015456	0.00221527	0.0404939	0	0.0345671	0	0.0112374	0.0353273	0	0.00883052	0.0259621	0.000206132	0.328998	0.0203959	0.442984	0	0	0	0.0157991	0	0.017527	0.01	0.28234	1.01395
CGGA_1443	Pattern C	0.0439127	0	0.01268	0.126306	0	0	0	0.0185281	0.040798	0.00233387	0	0.0452492	0.0230658	0.0430353	0.0129526	0.454696	0.0286879	0	0	0.14667	0	0.00108529	0.13	0.142949	1.04734
CGGA_1454	Pattern C	0	0.139161	0.0418106	0	0	0.30223	0	0	0.0220813	0	0	0.200944	0.0592229	0	0	0.162277	0.00302664	0.0100944	0	0.0562646	0.00288847	0	0.95	-0.0298969	1.13632
CGGA_1472	Pattern C	0	0.0161301	0.0560405	0.123279	0	0.0125303	0	0	0.0721111	0	0.16518	0.0891674	0.207208	0	0	0.245551	0	0	0.00790565	0	0	0.00489765	0.08	0.170518	1.0416
CGGA_1477	Pattern C	0	0.0143644	0.00679498	0.00187216	0.00364041	0.0524961	0	0	0.0131257	0	0.023666	0.0347838	0.25321	0	0.0194226	0.411904	0	0	0.16472	0	0	0	0.05	0.230504	1.00286
CGGA_1482	Pattern C	0	0.0175094	0.0115556	0.0395631	0	0.0672523	0	0	0	0	0.0197725	0.0224365	0.280912	0	0.0396359	0.357399	0.10643	0	0.0178121	0	0	0.0197217	0.01	0.284869	0.980566
CGGA_1500	Pattern C	0.0228502	0	0	0.0267735	0	0.0799321	0	0	0.00833152	0	0	0.0688477	0.159362	0	0.0622015	0.371223	0	0	0.195731	0.00474757	0	0	0.13	0.149284	1.02821
CGGA_1501	Pattern C	0	0.028177	0.0230127	0.12033	0	0	0	0.0227588	0.0450697	0	0	0.0493104	0.0229584	0.225855	0.0110056	0.38914	0	0	0.0623828	0	0	0	0.01	0.290712	0.980272
CGGA_1502	Pattern C	0.03705	0	0.0737026	0.139516	0	0	0	0.0313598	0	0	0	0.0888694	0.0841682	0	0.0229155	0.509566	0	0	0	0.0107529	0	0.00209912	0.05	0.225127	1.00791
CGGA_1504	Pattern C	0.0382605	0	0.0834899	0.0319077	0	0.0808371	0	0.00634432	0.0118286	0	0.0290291	0.0358568	0.155675	0	0.01877	0.420467	0	0	0.0854323	0	0	0.00210195	0.02	0.275796	0.97419
CGGA_1508	Pattern C	0	0.0216497	0	0.0241338	0	0.103624	0	0	0.0199996	0	0	0.0788208	0.279298	0	0.00837702	0.336473	0.02093	0	0.0217769	0.0849175	0	0	0.04	0.253726	0.993835
CGGA_1513	Pattern C	0	0.0572823	0.0227272	0	0.0117385	0.0964397	0	0.0557394	0.035695	0	0.0209503	0.0513569	0.0276472	0	0.00493433	0.327185	0.0196223	0	0	0.244376	0	0.0243061	0.16	0.128548	1.0462
CGGA_1520	Pattern C	0.0133781	0	0	0.0390117	0	0.0911173	0	0.01134	0.0198346	0	0.0188144	0.0530941	0.243197	0	0.0235258	0.406416	0	0	0.0802706	0	0	0	0.02	0.272309	0.982389
CGGA_1525	Pattern C	0	0.147153	0.0627572	0.115749	0.0340497	0	0	0.000461856	0.0655549	0	0	0.0903107	0.00429203	0.00447456	0.0114675	0.186498	0.0194728	0	0.232044	0	0.0203324	0.00538275	0.24	0.0868965	1.03733
CGGA_1528	Pattern C	0	0.0903725	0.0228276	0.0535268	0	0.0781792	0	0.0150355	0.042521	0	0.0277621	0.0306229	0.0229898	0	0.00558342	0.53563	0.0233799	0	0.0483224	0	0	0.00324713	0.05	0.221445	1.00627
CGGA_1530	Pattern C	0.117616	0	0	0.123114	0.0326327	0	0	0	0.0301327	0	0.00551569	0.0220205	0	0	0	0.40825	0.188641	0	0	0	0	0.0720779	0.13	0.143455	1.03958
CGGA_1533	Pattern C	0.0589925	0	0.00777919	0.128366	0	0	0	0.0536472	0	0	0	0.0926744	0.0306913	0	0.0143458	0.413158	0.0839865	0	0	0.115848	0	0.000511475	0.34	0.0535502	1.08273
CGGA_1534	Pattern C	0	0.0223471	0.00846807	0.0157796	0.00641633	0.0660725	0	0	0.0113091	0	0	0.0790523	0.152347	0	0.00932417	0.289609	0.0510462	0	0	0.288229	0	0	0	0.329618	0.960523
CGGA_1535	Pattern C	0.0183031	0	0.00363562	0.0666788	0	2.39951e-05	0	0.0201626	0.0067702	0	0	0.080124	0.122109	0	0.00853672	0.63507	0	0	0	0.0385862	0	0	0	0.502719	0.865778
CGGA_1543	Pattern C	0.00687672	0	0.0541439	0.0310627	0	0.00696155	0	0.0316715	0	0	0	0.0791068	0.129307	0	0.00229699	0.439472	0	0	0	0.210806	0.00829439	0	0.06	0.211486	1.02252
CGGA_1546	Pattern C	0.00845969	0	0.0364758	0.0594554	0	0	0	0.00884392	0.0401677	0	0.0302385	0	0.120614	0.311845	0.0246491	0.287136	0	0	0	0.0470859	0	0.0250291	0.17	0.121955	1.07974
CGGA_1551	Pattern C	0	0.0331763	0.0152293	0.0886066	0	0	0	0.0394264	0.0564556	0	0.0858291	0	0.072081	0.192065	0.00429997	0.339785	0	0	0	0.0392653	0.00441731	0.029363	0.26	0.0710928	1.08066
CGGA_1557	Pattern C	0	0.0691486	0.0317162	0.0589458	0	0.0400118	0	0.0561409	0	0	0.00637104	0.0573406	0.0396364	0	0.00708296	0.424469	0	0	0	0.190382	0	0.0187551	0.25	0.0793503	1.07105
CGGA_1565	Pattern C	0.027996	0	0.000612393	0.0490912	0	0.0484133	0	0	0	0	0	0.0414179	0.229111	0	0.02624	0.381316	0.0649787	0	0.0315446	0.0913063	0	0.00797357	0.03	0.265093	0.9882
CGGA_1566	Pattern C	0	0.078749	0.0288494	0.0140169	0.093378	0	0	0.159198	0	0	0	0.121999	0	0	0	0.398898	0	0	0	0.0978769	0	0.00703501	0.46	0.0389258	1.08857
CGGA_1567	Pattern C	0.00645334	0	0.0262566	0.239349	0	0.0375179	0	0.0475054	0.0495081	0	0.00728234	0.0972265	0.174582	0	0.0563277	0.232197	0	0	0.00885225	0.0169419	0	0	0.16	0.12903	1.0499
CGGA_1568	Pattern C	0.00884384	0	0.112275	0.0507862	0	0.0363568	0	0.0270679	0.00443789	0	0	0.117525	0.211686	0	0	0.299483	0	0	0.110238	0	0	0.0213009	0.07	0.18416	1.01394
CGGA_1569	Pattern C	0	0.0246761	0	0	0.00563864	0.135088	0	0	0	0	0	0.105278	0.246311	0	0.00413144	0.286269	0	0	0.185446	0	0	0.00716203	0.16	0.128778	1.03838
CGGA_157	Pattern C	0	0.0427113	0.010267	0.0100955	0	0.137694	0	0.00524995	0.0430594	0	0.0117037	0.0747504	0.249883	0	0	0.254582	0	0	0.114684	0.030046	0	0.0152738	0.08	0.17295	1.01772
CGGA_1571	Pattern C	0	0.0628623	0	0.0488836	0.0491594	0.0233389	0	0.00923892	0	0	0.016844	0.0444464	0.0851722	0	0.0107637	0.424819	0.10353	0	0.120942	0	0	0	0.06	0.194975	1.01014
CGGA_1572	Pattern C	0	0.0193976	0.0379358	0.0761751	0	0.0261411	0	0.00409895	0.0233974	0	0	0.0616954	0.21179	0	0.000959272	0.430286	0	0	0.0616304	0.0281407	0	0.0183526	0	0.306683	0.966153
CGGA_1579	Pattern C	0.0437815	0	0	0.021973	0.0378855	0.121246	0	0.0755878	0	0	0	0.0967945	0.0477746	0	0	0.222637	0	0	0	0.289276	0	0.0430438	0.79	-0.00826743	1.1215
CGGA_1583	Pattern C	0	0.0877496	0.0265882	0.0489499	0	0.0966379	0	0.00970507	0.0415922	0	0	0.142515	0.0549936	0	0.00680575	0.299693	0.0443662	0	0	0.114279	0.00942185	0.0167025	0.25	0.0759743	1.06892
CGGA_1588	Pattern C	0.0175034	0	0.0811262	0.171361	0.0119495	0.0612766	0	0.0113243	0.019993	0	0	0.079737	0.15806	0	0.0211065	0.314192	0.0335537	0	0	0.0030939	0	0.0157228	0.05	0.240117	0.990982
CGGA_1594	Pattern C	0	0.0285586	0.0783713	0.0516683	0.0256292	0	0	0.0304573	0.0482362	0	0	0.163406	0.0103032	0	0.000854447	0.295975	0.080264	0	0	0.180826	0	0.00545088	0.22	0.0930442	1.07262
CGGA_1595	Pattern C	0	0	0.00863772	0.053369	0	0.0365757	0	0.0872882	0	0	0	0.0995629	0.182442	0	0.0150559	0.397536	0.0478856	0	0	0.0493657	0	0.0222813	0.24	0.0850772	1.07261
CGGA_1603	Pattern C	0.0436703	0	0.0623608	0.114218	0	0	0	0.165075	0	0	0	0.0453958	0	0.231483	0.0254794	0.248314	0	0	0.0102636	0	0	0.05374	0.13	0.145961	1.04137
CGGA_1605	Pattern C	0	0.058507	0.00175991	0.0320123	0	0.218384	0	0.0527707	0.00738715	0	0.0483565	0.0494927	0.136956	0	0.00295338	0.236472	0.0125121	0	0	0.12523	0.0170626	0.00014309	0.3	0.0627472	1.06603
CGGA_1610	Pattern C	0.00618805	0	0.178953	0.137543	0	0.0147951	0	0.0369359	0.0882342	0	0	0.0928144	0.015002	0	0.00940199	0.360141	0	0	0.0578037	0	0	0.00218758	0.05	0.249873	0.986443
CGGA_1614	Pattern C	0	0.0100709	0.00959113	0.0297158	0	0.0665805	0	0.0173178	0	0	0	0.0488345	0.25397	0	0.0218064	0.477153	0.00236457	0	0.0558809	0.00671484	0	0	0.04	0.259798	0.996997
CGGA_1615	Pattern C	0	0.0803018	0.0248035	0.100609	0	0	0	0	0.151027	0	0.0517765	0	0.00344184	0	0.0165707	0.433894	0.00430509	0	0.13327	0	0	0	0.16	0.130923	1.03271
CGGA_1617	Pattern C	0	0.0843172	0.0165991	0.0679168	0.0369814	0	0	0.00336484	0.0790483	0	0	0.170529	0.0861784	0	0.000281295	0.109598	0.0268452	0	0	0.293108	0	0.0252333	0.63	0.0152191	1.13001
CGGA_1618	Pattern C	0	0.103384	0	0.029266	0	0.0473665	0	0.0263821	0	0	0	0.0295819	0.250094	0	0.00105947	0.345272	0	0	0.167593	0	0	0	0.14	0.142196	1.03328
CGGA_1620	Pattern C	0	0.120943	0.0457839	0.0214508	0.00502679	0.0709549	0	0	0.0877143	0	0.0469523	0.111691	0.0778626	0	0	0.205118	0.107194	0	0	0.0774361	0.0218716	0	0.31	0.059069	1.06439
CGGA_1621	Pattern C	0	0.0689908	0.0356751	0	0	0.149836	0	0	0.1059	0	0.070899	0.0243964	0.038646	0	0.0104058	0.353505	0	0	0.129831	0	0.0080131	0.00390166	0.15	0.134431	1.02585
CGGA_1627	Pattern C	0.00504248	0.00550847	0	0.000144623	0	0.117618	0	0.013074	0.068673	0	0.0763599	0	0.0576183	0	0.00284471	0.526952	0.00417017	0.00606517	0.098317	0	0	0.017612	0.06	0.213695	1.01027
CGGA_1630	Pattern C	0	0.080955	0	0.0147745	0	0.0765029	0	0.00481769	0.0336163	0	0.0155707	0.04269	0.227511	0	0	0.307426	0	0	0.196137	0	0	0	0.07	0.179123	1.01193
CGGA_1640	Pattern C	0.026426	0	0	0	0.0449997	0.00120668	0	0.0319542	0	0	0	0.0715739	0.172359	0	0.00176292	0.234329	0.0478654	0	0	0.367524	0	0	0.01	0.294315	0.986731
CGGA_1641	Pattern C	0.074347	0	0.00437975	0.0360576	0	0	0	0.0844181	3.49573e-05	0	0	0.0657174	0.0171547	0.252342	0.0101053	0.327261	0	0	0	0.109086	0	0.0190955	0	0.315334	0.972023
CGGA_1642	Pattern C	0	0.0507073	0.0244628	0.0639157	0.0935794	0	0	0.0146538	0.0260402	0	0.121208	0.000777751	0.0490154	0	0.020896	0.325318	0.0218303	0	0.165667	0	0	0.0219286	0.26	0.0718589	1.04674
CGGA_1647	Pattern C	0	0.1307	0.0611705	0.0294913	0.0276068	0.0115215	0	0	0.0668729	0	0.0759677	0.0266793	0.0480559	0	0.0195369	0.225973	0.0436956	0	0.198344	0	0.0114868	0.0228969	0.2	0.109293	1.024
CGGA_1648	Pattern C	0	0.0780191	0.0366751	0.0188132	0	0.189706	0	0	0.0051046	0	0.0100134	0.0567788	0.0231596	0	0.0287967	0.391551	0.034655	0	0.117229	0	0	0.00949855	0.07	0.184193	1.00812
CGGA_1649	Pattern C	0	0.204319	0.0959594	0.0519274	0.00507561	0.00950893	0	0	0.0692992	0	0.0320097	0.0108864	0.0576986	0.0452649	0.040149	0.216501	0.0206436	0	0.121668	0	0	0.0190888	0.24	0.0853674	1.03873
CGGA_165	Pattern C	0	0.104707	0.0454225	0.0274182	0.0603892	0	0	0.0463279	0.00234701	0	0	0.133038	0.151649	0	0.00536792	0.347457	0.0183365	0	0	0.0294841	0	0.0280551	0.16	0.12905	1.04409
CGGA_1651	Pattern C	0.0408099	0.00254777	0	0.0434297	0	0.265352	0	0.0212681	0.134552	0	0.0410262	0.0367492	0.0411346	0.0392084	0	0.111835	0	0.0108	0.197	0	0.0133713	0.000915758	0.65	0.0133869	1.08525
CGGA_1653	Pattern C	0	0.0976502	0.0299507	0.0131986	0.109237	0.0246276	0	0.0404502	0.0233513	0	0.0233769	0.0684891	0.0732411	0	0.0161882	0.385519	0.0108432	0	0	0.0687531	0.00589983	0.00922431	0.16	0.124012	1.04007
CGGA_1655	Pattern C	0.027077	0	0.00145942	0.0909532	0	0.00464306	0	0.0233361	0	0	0	0.0522911	0.185021	0	0.0107229	0.508366	0.00745163	0	0.0384193	0.0105375	0	0.0397218	0.02	0.268948	0.993187
CGGA_1657	Pattern C	0	0.0811296	0	0.000215459	0	0.120239	0	0.0536231	0	0	0	0.159672	0.167955	0	0	0.26101	0	0	0	0.113797	0	0.0423592	0.25	0.0753486	1.07767
CGGA_1658	Pattern C	0.12092	0	0.0304404	0.0439888	0	0.0679015	0	0	0.0620583	0	0	0.0184636	0.161644	0	0.0158191	0.292418	0.102443	0	0.0312558	0	0.0202451	0.0324029	0.14	0.142095	1.02829
CGGA_1661	Pattern C	0	0.0847185	0.0321646	0.0201658	0	0.133385	0	0	0.0493514	0	0.00780292	0.06403	0.0273927	0	0.00943353	0.502872	0.00194437	0	0	0.0593579	0	0.00738223	0.06	0.192501	1.02006
CGGA_1662	Pattern C	0	0.0968788	0.0316945	0.0248515	0.0230161	0	0	0.025708	0.13086	0	0.103551	0	0.0374793	0.122663	0	0.251571	0	0	0.149897	0	0.00183032	0	0.24	0.0860554	1.04313
CGGA_1663	Pattern C	0	0.0275225	0.0147772	0.146471	0	0.0236619	0	0.0155756	0	0	0	0.0843774	0.0886921	0	0.0144629	0.40521	0.0293194	0	0	0.12336	0.0131822	0.013388	0.08	0.178056	1.02729
CGGA_1664	Pattern C	0	0.0419667	0.0215524	0.0296535	0	0.198367	0	0	0.135325	0	0.0469576	0.0703178	0.0850287	0	0	0.217687	0.0484453	0.0233685	0	0.0551805	0.0136018	0.0125476	0.16	0.129545	1.03828
CGGA_1679	Pattern C	0	0.105456	0.0478238	0.00856773	0.162638	0	0	0	0.313504	0	0.055984	0.0831838	0.0444983	0.0348005	0.00198681	0.0756695	0.0658884	0	0	0	0	0	0.79	-0.00979874	1.12208
CGGA_1681	Pattern C	0	0.0266395	0.00753082	0	0	0.162605	0	0.00819713	0.0302851	0	0.0715457	0.0345317	0.0690143	0	0	0.51326	0	0.0318801	0	0.0227662	0	0.0217447	0.26	0.0737551	1.07839
CGGA_1686	Pattern C	0	0.0329679	0	0.0981696	0	0.0254296	0	0.0299734	0	0	0	0.0488733	0.13949	0	0.00185068	0.486589	0	0	0.123127	0	0	0.0135297	0.16	0.12823	1.04858
CGGA_1693	Pattern C	0.103587	0	0	0.0729333	0	0.0258327	0	0.137143	0	0	0	0.166876	0.124422	0	0.00968621	0.281427	0.0381582	0	0.019249	0.0206873	0	0	0.43	0.0434639	1.08649
CGGA_1695	Pattern C	0	0.0727005	0.00519108	0.00909158	0.0226593	0.0223112	0	0.0416175	0	0	0	0.0860272	0.124907	0	0	0.235264	0	0	0	0.38023	0	0	0.12	0.155948	1.06001
CGGA_1700	Pattern C	0.0259658	0	0.0127711	0.0373915	0	0.0296353	0	0.0875425	0	0	0	0.0848763	0.15653	0.00751214	0.0305401	0.3162	0	0	0.211035	0	0	0	0.06	0.2116	0.996064
CGGA_1701	Pattern C	0	0.13887	0.0617989	0.0755857	0	0.159421	0	0	0.0302541	0	0.0359674	0.0785368	0.152367	0	0	0.125854	0.0213083	0	0	0.120036	0	0	0.31	0.0592265	1.06548
CGGA_1703	Pattern C	0.0311042	0	0.000148833	0.0255374	0	0.0969783	0	0	0.0148509	0	0.0308739	0.0191813	0.204882	0	0.00865042	0.482637	0	0	0.0675873	0.00421562	0	0.0133528	0.02	0.275903	0.984789
CGGA_1704	Pattern C	0.032422	0	0.0150768	0.0208702	0.0475394	0	0	0.00875714	0	0	0	0.0577988	0.274716	0	0	0.414115	0	0	0.128704	0	0	0	0.03	0.264409	0.988982
CGGA_1706	Pattern C	0.0138596	0	0.00706803	0.12978	0	0.0057307	0	0.00525664	0.0337623	0	0.0217848	0	0.0653451	0.146921	0.00977493	0.457474	0	0	0	0.0410924	0.0225059	0.0396452	0	0.374273	0.938174
CGGA_1714	Pattern C	0	0.0464606	0.0126221	0.0576074	0	0	0	0.0764795	0	0	0	0.058182	0.108083	0	0.00110868	0.452053	0	0	0.0931043	0.0943002	0	0	0	0.338159	0.94865
CGGA_1721	Pattern C	0	0.0768221	0.0149077	0.0273171	0.0349281	0	0	0.0895912	0	0	0	0.102557	0.114597	0	0.0201064	0.43816	0	0	0.0810145	0	0	0	0.21	0.104212	1.05228
CGGA_1727	Pattern C	0	0.0364816	0.0223393	0	0.0450539	0.0373527	0	0.0114613	0.053078	0	0.0773293	0.030523	0.0643135	0	0	0.461844	0	0.0030169	0.120847	0	0.0221035	0.0142557	0.06	0.214144	1.00198
CGGA_1729	Pattern C	0	0	0.00804335	0.23528	0	0	0	0.0669572	0	0	0	0.131947	0.0772817	0	0.0152504	0.432206	0	0	0.030322	0.00271267	0	0	0.26	0.0738769	1.08582
CGGA_1731	Pattern C	0.00416961	0	0.00520401	0.00105497	0.00936405	0.0594243	0	0.0318656	0	0	0	0.0814299	0.265197	0	0.0022747	0.337459	0.00691401	0	0	0.195643	0	0	0.04	0.262245	0.996815
CGGA_1737	Pattern C	0	0.0178492	0.0189603	0.0702946	0	0.109505	0	0.0254415	0.0689567	0	0	0.12573	0.0342845	0	0.0163344	0.421511	0.0196255	0	0.0545373	0	0	0.0169698	0.65	0.0118304	1.09854
CGGA_1743	Pattern C	0	0.0602421	0.0134962	0.031752	0	0.108982	0	0.0136143	0.0113262	0	0.0399336	0.0133399	0.116549	0	0.0025398	0.072398	0.0819537	0	0	0.433873	0	0	0.31	0.0568991	1.09828
CGGA_1744	Pattern C	0	0.0102625	0.00826103	0	0	0.0777288	0	0.0287859	0.0587285	0	0.026514	0	0.0145882	0.472098	0.00030036	0.23428	0	0	0	0.0567775	0	0.0116749	0.08	0.176178	1.08268
CGGA_1747	Pattern C	0.0380475	0	0.0176844	0.0302073	0.0234076	0	0	0	0.0111217	0	0	0.053126	0.128775	0	0.00018135	0.540633	0.0470606	0	0.103567	0.00618927	0	0	0	0.413448	0.914735
CGGA_1760	Pattern C	0.00276049	0	0.00804539	0.0462707	0	0.0280604	0	0.045321	0	0.00613048	0	0.0541356	0.105323	0.127424	0.0670731	0.386195	0	0	0.0988811	0.00619007	0	0.0181902	0.06	0.195974	1.02012
CGGA_1811	Pattern C	0.000407537	0	0.00496803	0.0673451	0	0.0427987	0	0.00430947	0	0	0	0.054255	0.186931	0	0.0242123	0.461139	0.079481	0	0.00739856	0.0664255	0	0.000328364	0.06	0.19933	1.02616
CGGA_1817	Pattern C	0.0069218	0	0.00832761	0.0460813	0	0.0466605	0	0.00909789	0.00417946	0	0	0.0457759	0.175163	0	0.00408172	0.475993	0	0	0	0.164385	0	0.0133326	0.09	0.164224	1.04833
CGGA_1829	Pattern C	0.0287585	0	0	0.0811152	0	0.0720003	0.00629036	0.000626056	0	0	0	0.0867321	0.177356	0	0.0173969	0.349253	0.0389596	0	0	0.141513	0	0	0.2	0.106345	1.06112
CGGA_1854	Pattern C	0.0457896	0	0	0.0180189	0	0.0783002	0	0	0	0	0.00778857	0.0385432	0.281397	0	9.52961e-05	0.373669	0	0.00105026	0.105222	0.0501253	0	0	0	0.316599	0.961859
CGGA_1857	Pattern C	0.0341775	0	0.0134823	0.10242	0	0.0858587	0	0.0142185	0.0217244	0	0	0.0468705	0.11646	0	0.0304045	0.393729	0.0274348	0	0.0778615	0.00313694	0.0102303	0.0219911	0.01	0.297435	0.963812
CGGA_1863	Pattern C	0.0509751	0.00615181	0	0.0226152	0	0.215446	0	0.063761	0.122122	0	0.192067	0	0.0670444	0	0	0.141386	0.0831796	0.00725336	0	0	0.0279985	0	0.71	0.0037204	1.10737
CGGA_1875	Pattern C	0.0186992	0	0	0.0374286	0	0.190814	0	0.00391799	0.0208267	0	0.0285299	0.000782234	0.152735	0	0	0.48414	0	0.0236505	0	0.0245211	0.00281298	0.0111418	0	0.389379	0.92566
CGGA_1880	Pattern C	0.077586	0	0.0341968	0.00596347	0	0.115911	0	0.0218914	0	0	0	0.0683885	0.171564	0	0.00772831	0.324184	0.0166781	0	0	0.139029	0	0.0168781	0.19	0.112422	1.04936
CGGA_1882	Pattern C	0	0.11202	0.0430976	0.0465031	0.0077789	0.00772866	0	0.0311076	0.0265524	0	0	0.0762624	0.0994098	0	0.0112731	0.342222	0.0185313	0	0	0.177513	0	0	0.12	0.155385	1.03107
CGGA_1899	Pattern C	0.0142609	0	0.0111293	0.0648916	0	0.0231499	0	0.0670347	0	0	0	0.0779654	0.183392	0	0.00040726	0.379558	0	0	0	0.178211	0	0	0.01	0.288659	0.978098
CGGA_1901	Pattern C	0.102086	0	0.0536997	0.0909244	0	0.144453	0	0	0.0586751	0	0.0037153	0	0.149502	0.0417166	0.0133293	0.316637	0	0	0	0.0190444	0	0.00621769	0.23	0.0914799	1.05287
CGGA_1902	Pattern C	0	0.0836542	0.0341879	0.037873	0	0.141699	0	0	0.0350589	0	0.0587785	0.0751813	0.0682136	0	0.0147524	0.251389	0.0578825	0	0	0.131965	0.00589088	0.00347351	0.24	0.0859114	1.05449
CGGA_1903	Pattern C	0	0.20989	0.0546575	0	0.0794909	0	0	0	0.0172011	0	0	0.0548684	0.116454	0	0.000162623	0.234756	0	0	0	0.23252	0	0	0.08	0.174283	1.02204
CGGA_1906	Pattern C	0	0.00628591	0.0878832	0.0778023	0	0.0484971	0	0.0105354	0.00580693	0	0.00806656	0.0372275	0.157832	0	0.018159	0.418159	0.0187807	0	0.0992052	0	0	0.00575907	0	0.309432	0.95916
CGGA_1912	Pattern C	0	0.0754502	0.0196069	0.0457798	0.044393	0	0	0.010735	0	0	0	0.0780394	0.0791853	0	0	0.591265	0	0	0	0.0531875	0	0.00235779	0.12	0.155627	1.05371
CGGA_1953	Pattern C	0	0.0407067	0.0183227	0.0226606	0	0.169101	0	0.00132714	0.058422	0	0.012822	0.0566036	0.0519497	0.0134133	0.0178852	0.385502	0.0527496	0	0.079416	0	0.0141977	0.00492082	0.24	0.0856418	1.0523
CGGA_1955	Pattern C	0	0.0738136	0.025435	0.117891	0	0.106621	0	0.0146406	0.0663795	0	0.0603435	0.0867093	0.0562083	0	0.00521968	0.217932	0.0415551	0	0	0.103219	0.0240325	0	0.5	0.0340846	1.08374
CGGA_1994	Pattern C	0.0731607	0	0.156924	0.0296698	0	0.106988	0	0.06647	0	0	0	0.116575	0.0409012	0	0.01524	0.369098	0	0	0.0212263	0	0	0.00374747	0.52	0.0315603	1.08199
CGGA_2003	Pattern C	0.0541326	0	0	0.111757	0	0.121495	0	0.00938721	0.0740749	0	0	0.0367652	0.120876	0	0.00951206	0.384345	0.044342	0.00129326	0	0.0193023	0.000177105	0.0125398	0.08	0.176102	1.02245
CGGA_2008	Pattern C	0.0264218	0	0	0.104529	0	0.021165	0	0	0.0205501	0	0	0.0309343	0.00224555	0.048781	0.0103764	0.585739	0.132069	0	0.00149334	0.0132056	0	0.00249083	0.07	0.186294	1.0457
CGGA_2013	Pattern C	3.48746e-05	0.0135455	0.00590355	0.0212575	0	0.154638	0	0.00903452	0.0547047	0	0	0.0510855	0.0207337	0	0.0127998	0.387105	0.115652	0	0.110613	0	0.0376403	0.00525252	0.07	0.182278	1.01208
CGGA_2024	Pattern C	0.0331554	0	0.0211908	0.0916652	0	0.08734	0	0	0.0501937	0	0	0.0545599	0.127712	0	0.0121178	0.157561	0.019113	0	0	0.345391	0	0	0.58	0.0231663	1.10516
CGGA_2039	Pattern C	0	0.0749466	0.00943867	0.0628508	0	0.0444639	0	0	0.0150064	0	0.0038215	0.0374944	0.177438	0	0	0.436275	0	0	0	0.13005	0	0.00821447	0.07	0.180593	1.02901
CGGA_2053	Pattern C	0	0.0940731	0	0.0813755	0	0.10326	0	0	0	0	0	0.0813223	0	0	0.0182268	0.398817	0.113931	0	0	0.101139	0	0.00785569	0.79	-0.00839604	1.10361
CGGA_2106	Pattern C	0.0113608	0	0.0125549	0.106303	0	0.0828853	0	0	0.114815	0	0.123849	0	0.0147461	0.0810629	0.00239132	0.275928	7.64053e-05	0	0.174027	0	0	0	0.43	0.0447745	1.06796
CGGA_235	Pattern C	0	0.00359644	0	0.0249226	0.0820731	0	0	0.108706	0	0	0	0.103392	0.171108	0	0	0.446048	0	0	0.0366449	0.0235094	0	0	0.73	0.00207012	1.11013
CGGA_241	Pattern C	0.0228273	0	0	0.0583566	0	0.00981541	0	0.0146144	0.0102307	0	0	0.0371255	0.0182157	0	0.0110864	0.207363	0.014478	0	0	0.566992	0	0.0288949	0	0.343339	0.986226
CGGA_256	Pattern C	0.0501931	0	0	0	0	0.135031	0	0	0	0	0	0.0894825	0.260841	0	0.0158219	0.230718	0.0355475	0	0.0960282	0.086337	0	0	0.11	0.158703	1.02678
CGGA_261	Pattern C	0.0480352	0	0	0.0571734	0	0.17946	0	0	0.0994913	0	0.00951189	0.0666111	0.108013	0	0.00463406	0.310793	0.00281887	0	0	0.0995834	0.00587687	0.00799848	0.2	0.108827	1.05128
CGGA_269	Pattern C	0.0267763	0	0.00316363	0.0493078	0	0.0498205	0	0.0395848	0.00106565	0.00354311	0	0.0135886	0.073468	0	0.0211048	0.232834	0.049814	0	0	0.42428	0	0.0116492	0	0.436996	0.904364
CGGA_277	Pattern C	0.104504	0.00624461	0	0	0.0686341	0.0244095	0	0.139567	0	0	0	0.126365	0.112397	0	0.0254882	0.205689	0.0971544	0	0.0662892	0.0156768	0	0.00758007	0.6	0.0182852	1.07536
CGGA_28	Pattern C	0	0.0846228	0.0151672	0.0391882	0	0.159657	0	0.0133983	0.0961487	0	0.0713495	0	0.0224408	0	0.00145096	0.306375	0.00955363	0.00751883	0.127258	0	0.0241358	0.0217351	0.29	0.0669376	1.05017
CGGA_283	Pattern C	0	0.0284127	0.00902018	0.00722003	0	0.0714039	0	0.00755296	0.0227386	0	0	0.0458973	0.161913	0	0	0.0370806	0.0883923	0	0	0.452492	0	0.0678766	0.06	0.196979	1.04522
CGGA_323	Pattern C	0.16228	0	0.0242133	0.123837	0.116849	0	0	0.117319	0	0	0	0.121591	0	0	0	0.0400059	0.0257136	0	0	0.25571	0	0.0124817	0.98	-0.0424631	1.1535
CGGA_342	Pattern C	0	0.0192354	0	0.0393603	0	0.0903241	0	0	0.0401006	0	0.0198028	0	0.030388	0.0696399	0.00615488	0.504335	0	0	0.135305	0	0.0120931	0.0332605	0.05	0.2237	1.00801
CGGA_358	Pattern C	0.0124343	0	0.0295464	0.0308771	0	0.0369713	0	0.011301	0.0090243	0	0	0.0334528	0.241239	0	0.00425122	0.190535	0	0	0	0.395281	0	0.00508642	0	0.419099	0.916223
CGGA_369	Pattern C	0	0.0317049	0.00248465	0	0	0.0644317	0	0.000793321	0.00794986	0	0	0.043049	0.0904659	0	0.0109513	0.307297	0	0	0	0.426164	0	0.0147087	0.07	0.187579	1.05422
CGGA_400	Pattern C	0.0676286	0	0	0.0623272	0	0.0506687	0	0	0.0364843	0	0	0.0187476	0.164343	0	0.0180983	0.528469	0.0198741	0	0.0333598	0	0	0	0	0.309975	0.969613
CGGA_494	Pattern C	0	0.0631891	0	0.0736744	0	0.185691	0	0.016148	0.0864989	0	0.0725146	0.0433901	0.105348	0	0	0.169635	0.0183662	0	0	0.154846	0.010699	0	0.75	0.000991855	1.09745
CGGA_525	Pattern C	0.0695379	0	0.0101914	0.0759269	0	0	0	0.0839046	0.00890023	0	0.00895322	0.0142888	0.0320743	0	0.0277417	0.600717	0	0	0.0398762	0	0	0.0278875	0.19	0.113213	1.06793
CGGA_541	Pattern C	0.0228954	0	0	0	0.136773	0.0624264	0	0	0.149366	0	0	0.169321	0.0253877	0.0999783	0	0	0.00119227	0	0.262127	0	0.00675939	0.0637738	0.99	-0.0571027	1.12646
CGGA_543	Pattern C	0	0.0749647	0.0184155	0.0861142	0	0.178343	0	0.0427167	0.0374821	0	0.0382579	0.0217025	0.0282757	0	0.00416915	0.29687	0.016395	0	0.136155	0	0.0201394	0	0.17	0.123227	1.03074
CGGA_554	Pattern C	0	0.0225764	0.0433111	0.0749642	0	0.0132176	0	0.0499761	0	0	0	0.104459	0.208108	0	0	0.244146	0	0	0	0.206026	0	0.0332148	0.06	0.190906	1.02419
CGGA_565	Pattern C	0	0.0440536	0.00846404	0	0.0265733	0.0861524	0	0.00306757	0	0	0.0239169	0.0328795	0.297597	0	0.00511426	0.304997	0	0	0.0987337	0.00168236	0	0.0667685	0.3	0.0623202	1.08091
CGGA_568	Pattern C	0.0307652	0	0.00658397	0.0101669	0	0.0180808	0	0.0209115	0.0231772	0	0	0.0316433	0.0880841	0	0	0.137943	0	0	0	0.358596	0	0.274048	0	0.406989	0.935891
CGGA_625	Pattern C	0.0421314	0	0	0.0182428	0	0.0451706	0	0.02446	0	0	0.0314139	0.0387823	0.237719	0	0	0.324715	0.00657862	0	0.15784	0.0281551	0	0.0447911	0.06	0.216171	1.00394
CGGA_659	Pattern C	0.0683539	0	0	0.0162939	0.0284344	0.0343198	0	0.004096	0.0163006	0	0	0.0802787	0.123882	0	0	0.132468	0.0200202	0	0	0.475552	0	0	0.22	0.0919543	1.11311
CGGA_669	Pattern C	0	0.0388188	0	0.266622	0	0.00314875	0	0	0.014035	0	0	0.0890518	0.137381	0	0	0.241154	0	0	0	0.125846	0	0.0839426	0.77	-0.000774532	1.11229
CGGA_694	Pattern C	0	0.0194434	0.00976134	0.0492625	0	0.119275	0	0.0176004	0.00424838	0	0	0.0976681	0.126684	0	0.00496632	0.386403	0.0320122	0.000276796	0	0.106383	0.0113129	0.0147017	0	0.329794	0.95425
CGGA_710	Pattern C	0.0450838	0	0.0257109	0.0754513	0	0.0177056	0	0.0041162	0	0.00561614	0	0.0258914	0.20224	0	0.00734452	0.493616	0.00773171	0	0.0894933	0	0	0	0	0.425677	0.906876
CGGA_715	Pattern C	0.137807	0	0	0.0412814	0.0346738	0.00376159	0	0.0627027	0	0	0	0.109434	0.017102	0	0.015549	0.464934	0	0	0.00457316	0	0	0.108182	0.99	-0.0449856	1.13385
CGGA_724	Pattern C	0	0.0277305	0.00859417	0.0507131	0	0.125353	0	0	0.111196	0	0.117927	0	0.0550411	0	0	0.390505	0.0329951	0.0200373	0.0324681	0	0.00777602	0.0196629	0.18	0.114484	1.04642
CGGA_760	Pattern C	0.0671503	0	0	0	0	0.108507	0	0	0.0255332	0	0	0.063833	0.0648561	0	0.00212009	0.295541	0.0320202	0	0	0.31135	0.000821629	0.0282673	0.09	0.167462	1.0407
CGGA_773	Pattern C	0.0859051	0	0.0118381	0.0193349	0.0111848	0.00710105	0	0	0.0151747	0	0	0.0538593	0.0487786	0.0255393	0.0132509	0.537501	0	0	0	0.118602	0	0.0519306	0.09	0.16583	1.04936
CGGA_785	Pattern C	0	0.0354927	0.000830151	0.00612091	0	0.0454211	0	0.0383602	0	0	0	0.0400354	0.0795055	0	0	0.25744	0.0408564	0	0	0.455937	0	0	0	0.321151	0.979721
CGGA_789	Pattern C	0.037662	0	0	0.136784	0	0.0195964	0.00479934	0.0154602	0	0	0.0158584	0.00445923	0.0841175	0	0.0148212	0.591621	0.0148916	0	0.0373588	0	0.00123272	0.0213371	0.05	0.231834	1.01288
CGGA_807	Pattern C	0.0535071	0	0	0.00238981	0	0.294714	0	0	0.277272	0	0	0	0.0209031	0.147245	0	0	0	0	0.203969	0	0	0	0.82	-0.0167807	1.11839
CGGA_812	Pattern C	0	0.0470218	0.0107691	0.0943462	0	0.043304	0	0.0237464	0.00446901	0	0	0.0645089	0.197763	0	0.0442922	0.307261	0	0	0.0151372	0.147381	0	0	0	0.367035	0.933782
CGGA_835	Pattern C	0	0.0418436	0.0188178	0.0391159	0	0.0486006	0	0.0350184	0	0	0.00721506	0.0366694	0.261119	0	0.00153664	0.310033	0.0322403	0	0	0.167789	0	0	0.05	0.2237	1.00586
CGGA_846	Pattern C	0	0.030642	0.00158002	0.0173234	0	0.0541526	0	0.0417363	0	0	0	0.0500187	0.200938	0	0	0.492946	0	0	0.0416297	0.0690332	0	0	0.04	0.258716	0.996562
CGGA_856	Pattern C	0	0.0189249	0.0149536	0.0945978	0.00226488	0.0503772	0	0	0.0449369	0	0.0312953	0.0462973	0.0440691	0	0.0107698	0.454641	0.0128136	0	0	0.167684	0.00314826	0.00322673	0.19	0.111933	1.06095
CGGA_869	Pattern C	0	0.0278635	0.0149398	0.0383375	0	0.0225957	0	0.0134641	0.0211631	0	0.0623938	0.0162962	0.0877558	0.284681	0.0143384	0.323744	0	0	0	0.0233443	0.0107117	0.0383711	0	0.436529	0.905265
CGGA_898	Pattern C	0.0905293	0	0	0	0	0.227466	0	0	0.080102	0	0.0821807	0.0344764	0.119163	0	0.00292513	0.247462	0	0	0.105768	0	0	0.00992709	0.3	0.0628833	1.05875
CGGA_D04	Pattern C	0.057902	0	0	0.0478013	0	0.0900896	0	0.0302034	0.0176231	0	0	0.0818978	0.022631	0	0	0.0618509	0.0916721	0.0168346	0	0.451681	0.0298131	0	0.02	0.279769	1.00115
CGGA_D07	Pattern C	0	0	0.0328283	0.00120369	0.189289	0	0	0.083665	0	0	0	0.169336	0.0896758	0	0.0217823	0.359874	0.0444069	0	0.00794009	0	0	0	0.56	0.0261338	1.09659
CGGA_D09	Pattern C	0	0.0220789	0	0	0.104673	0	0	0	0.0961317	0	0.0238739	0	0.0132134	0.418384	0.00917819	0.282165	0	0	0.0303015	0	0	0	0.05	0.230044	1.03916
CGGA_D20	Pattern C	0	0.0210157	0	0.0069189	0	0.0978832	0	0.00171585	0	0	0	0.0749289	0.0409382	0	0	0.201951	0	0	0	0.554649	0	0	0.23	0.0906087	1.14309
CGGA_D29	Pattern C	0.0368494	0	0	0.0127985	0	0.152074	0	0	0.104893	0	0.0713959	0.0795268	0.118544	0	0	0.277096	0.0493927	0	0	0.0974294	0	0	0.24	0.0890195	1.06172
CGGA_D30	Pattern C	0.0449333	0	0.0169511	0.11384	0	0.0772545	0	0	0.00323914	0	0	0.00881743	0.0788623	0	0.0421418	0.530005	0	0	0.0609245	0	0	0.0230308	0.16	0.130633	1.05077
CGGA_D35	Pattern C	0.0574005	0	0.00789445	0.0773172	0	0.0344182	0	0.00593449	0.0297412	0	0.0570495	0	0.130098	0	0.00467639	0.487454	0	0	0.0478179	0.0366664	0.0134847	0.0100465	0.21	0.0963908	1.06302
CGGA_D40	Pattern C	0	0.08285	0	0	0.200875	0	0	0.0315111	0	0	0	0.1358	0.00519737	0	0	0.237519	0.10958	0	0	0.196667	0	0	0.21	0.0977408	1.06428
CGGA_D52	Pattern C	0	0.0615309	0.0073567	0.133168	0	0.0191174	0	0	0.20644	0	0	0.129415	0.0442051	0	0	0.313568	0	0.0644864	0.020713	0	0	0	0.78	-0.00349688	1.10923
CGGA_D57	Pattern C	0	0	0.00520642	0.0269897	0	0.0659738	0	0	0.0747736	0	0.0256634	0	0	0.194026	0.018367	0.507739	0.00710062	0	0.0741609	0	0	0	0.01	0.295963	0.986981
CGGA_D58	Pattern C	0	0	0.00285682	0.03287	0	0.0472869	0	0.0110496	0.00471431	0	0	0.0533225	0.131723	0	0.0121044	0.555687	0	0	0.114089	0.0342966	0	0	0.06	0.193413	1.03062
CGGA_J130	Pattern C	0.040554	0	0.00620823	0.0939515	0	0.0457317	0	0.0370538	0	0	0	0.0729264	0.187874	0	0.0350778	0.390257	0.0709487	0	0.0194164	0	0	0	0.31	0.0599333	1.07649
CGGA_P121	Pattern C	0	0.0963076	0.0074715	0.0735326	0	0.0548934	0	0	0.0469226	0	0.00293494	0.0850728	0.152189	0	0.00266774	0.176749	0.0620278	0	0	0.239232	0	0	0.15	0.132046	1.04333
CGGA_P15	Pattern C	0	0.0359545	0	0.0170389	0	0.0889875	0	0	0.0387183	0	0.0336598	0.064025	0.215921	0	0.0305193	0.392372	0	0	0.0770061	0	0	0.00579679	0.06	0.219677	1.00464
CGGA_P151	Pattern C	0.00801162	0.0252965	0	0.0620452	0	0.0380274	0	0	0.0160052	0	0	0.0602883	0.290693	0	0.00504172	0.21869	0	0	0	0.275902	0	0	0.18	0.114554	1.07003
CGGA_P21	Pattern C	0.0281975	0	0	0	0	0.0533017	0	0.0206549	0	0	0.00818042	0.033514	0.171854	0	0.0178577	0.478263	0.0924053	0	0.0957707	0	0	0	0.05	0.243071	1.00139
CGGA_P269	Pattern C	0	0.0303508	0.00371721	0.0695361	0	0	0	0.0832854	0	0	0	0.0706477	0	0.169296	0.00580797	0.306422	0	0	0	0.260937	0	0	0.06	0.219739	1.02531
CGGA_P279	Pattern C	0	0.0850578	0.0398537	0.119911	0	0.109893	0	0	0.0690225	0	0.0868648	0.0408862	0.0592101	0	0.0356653	0.231652	0.0272644	0	0	0.0682246	0.0264945	0	0.8	-0.0121757	1.09266
CGGA_P280	Pattern C	0.0433922	0	0	0.00421561	0	0.103519	0	0.0243258	0	0	0	0.0474271	0.25457	0	0	0.470552	0	0	0.024548	0.0274506	0	0	0.21	0.0984922	1.07647
CGGA_P308	Pattern C	0.0422255	0	0	0.124674	0	0	0	0.0309364	0.00806405	0	0	0.0588666	0.270787	0	0.00997412	0.378517	0	0	0.0314258	0.0445289	0	0	0.2	0.111383	1.0602
CGGA_P31	Pattern C	0.0768367	0	0.020673	0.0739793	0	0.0424222	0	0.0415342	0.00583593	0	0	0.0692679	0.0421783	0	0.0218109	0.205428	0.119112	0	0	0.252966	0	0.0279552	0.07	0.186921	1.01704
CGGA_P310	Pattern C	0	0.043532	0.0188332	0.0331097	0	0.133178	0	0	0.0901723	0	0.0813207	0.00506796	0.0811896	0	0	0.33424	0.0332793	0	0	0.0855504	0	0.0605265	0.16	0.130313	1.03632
CGGA_P311	Pattern C	0.055507	0.0447565	0.0157689	0.0668913	0	0.124254	0	0.063419	0.0434185	0	0	0.0529641	0.108581	0	0.0462479	0.273715	0.00723267	0	0.0972447	0	0	0	0.05	0.232747	0.986453
CGGA_P314	Pattern C	0	0.0996658	0.0439159	0.028803	0	0.147611	0	0.00736186	0.0416117	0	0.0217564	0.0687752	0.0197588	0	0	0.372059	0.0106316	0.0163109	0.113249	0	0	0.00848981	0.25	0.0750919	1.05114
CGGA_P315	Pattern C	0	0.0856406	0	0	0	0.13355	0	0.00173076	0.124015	0	0.0201403	0.0958036	0.0886729	0	0.0067983	0.345191	0	0	0.0984574	0	0	0	0.26	0.0709365	1.06026
CGGA_P316	Pattern C	0	0.09722	0.0428239	0.0348346	0	0.0811102	0	0	0.0340107	0	0.0610379	0.0648588	0.0806434	0	0.0142965	0.472885	0	0	0	0	0	0.0162786	0.15	0.132404	1.04643
CGGA_P326	Pattern C	0	0.0508154	0.00540756	0	0	0.0567378	0	0.0191397	0.0028026	0	0	0.0303243	0.238088	0	0.00810349	0.148429	0	0	0	0.440152	0	0	0	0.371044	0.947706
CGGA_P335	Pattern C	0	0.0715537	0.0110394	0.0366665	0.0181851	0	0	0.0805402	0	0	0	0.0815709	0.0257638	0	0.00339343	0.532549	0	0	0	0.0719466	0	0.066791	0.04	0.253656	0.997888
CGGA_P346	Pattern C	0	0.0287304	0.0207174	0.0209404	0.0152989	0	0	0.0219808	0	0	0	0.0258217	0.0939283	0	0.00146833	0.354053	0.0197365	0	0	0.325936	0	0.0713875	0.04	0.259404	1.00309
CGGA_P356	Pattern C	0	0.045221	0.00058434	0.077086	0.00911796	0	0	0.00689659	0	0	0.00891895	0.0235697	0	0.263798	0	0.461625	0.0108014	0	0.0727323	0	0	0.0196495	0	0.419501	0.919879
CGGA_P358	Pattern C	0.0343909	0	0.00173362	0.110817	0	0.0472055	0	0.00874382	0.0232493	0	0	0.0462923	0.205992	0	0.0488866	0.337655	0.0823842	0	0.0390925	0.0135579	0	0	0.24	0.0857242	1.05966
CGGA_P385	Pattern C	0.0373085	0	0.0122265	0.0749041	0	0.0619432	0	0.0182102	0.0111959	0	0	0.0487535	0.036427	0	0.000578499	0.317162	0.11195	0	0	0.269341	0	0	0.46	0.0395651	1.09099
CGGA_P415	Pattern C	0	0.0264612	0.0151415	0.0373068	0	0.0906764	0	0.0431195	0	0	0	0.0684161	0.0845439	0	0.00279885	0.226537	0.00840547	0.0013653	0	0.361299	0.0230985	0.0108309	0.05	0.236776	1.01073
CGGA_P596	Pattern C	0	0.0788801	0.0366191	0.0402283	0.000386594	0	0.0621653	0.0105262	0	0	0.0308831	0	0	0.0273934	0.0151233	0.582823	0	0	0	0.0930528	0	0.0219193	0.14	0.140055	1.05742
CGGA_P609	Pattern C	0	0.0804241	0.0251472	0.0427494	0	0.10812	0	0.046888	0	0	0	0.104967	0.0692592	0	0.0681781	0.323295	0	0	0.117897	0.013075	0	0	0.13	0.146494	1.02447
CGGA_P610	Pattern C	0.0374504	0	0	0.108541	0	0.208611	0	0.00296377	0	0	0	0.0695331	0.0405618	0	0	0.406274	0.00346563	0.0154131	0	0.0682929	0.0274576	0.0114364	0.5	0.03317	1.08936
CGGA_P87	Pattern C	0.0583156	0	0.0857239	0.0699095	0	0.0223129	0	0.0330626	0.000776338	0	0	0.0859849	0	0.220907	0.00954759	0.367863	0	0	0	0.0455101	0	8.66561e-05	0.05	0.252695	1.00065
CGGA_P98	Pattern C	0.0282322	0	0.0063116	0.122461	0	0.0247454	0	0.020969	0	0	0	0.0987773	0.235829	0	0.0199114	0.313879	0	0	0	0.128886	0	0	0.05	0.230756	1.00504
CGGA_P99	Pattern C	0	0.0475867	0.00396978	0.00200212	0	0.0928196	0	0	0.00561027	0	0.00637622	0.0669891	0.304261	0	0.00612753	0.293278	0	0	0	0.162663	0	0.0083168	0.05	0.232047	1.00782
GSM2899180	Pattern C	0.0664161	0	0.0252255	0.118615	0	0.149131	0	0	0.164474	0	0.0294696	0.0919709	0.0492842	0	0	0.247737	0	0	0.0576764	0	0	0	0.56	0.0259036	1.09466
GSM2899184	Pattern C	0	0.111973	0	0.0560848	0	0.161707	0	0	0	0	0	0.0876014	0.195412	0	0.0160808	0.231677	0	0	0.139464	0	0	0	0.71	0.00349832	1.07815
GSM2899187	Pattern C	0.0041943	0.00484523	0.00052326	0.0465529	0	0.117126	0	0.0108805	0.0344771	0	0.0520157	0.0203373	0.0985862	0	0.0136579	0.344247	0.00142284	0.0047254	0.186357	0.0365528	0	0.0234981	0.13	0.147066	1.02271
GSM2899194	Pattern C	0.0272048	0.00570132	0	0.0471631	0	0.0456478	0	0	0.0249751	0	0	0.024964	0.0959317	0	0.00962608	0.539782	0.0740116	0	0.0906875	0.0110497	0	0.00325526	0	0.331099	0.95795
GSM2899195	Pattern C	0.116508	0	0	0.0415116	0	0.175565	0	0.011972	0	0	0	0.111426	0.0660672	0	0	0.194842	0.0319977	0	0	0.227364	0.00748885	0.0152569	0	0.332747	0.95336
GSM2899196	Pattern C	0.0416836	0	0	0.0252591	0.00283584	0.0505645	0	0.0137129	0.0147585	0	0.00725073	0.0822296	0.246107	0	0.00146266	0.246079	0.0444899	0	0	0.182659	0	0.0409072	0.05	0.242706	1.00031
GSM2899198	Pattern C	0.0229668	0	0.000660321	0.0347841	0	0.0300183	0	0.0400777	0	0	0	0.0361333	0.189863	0	0	0.224907	0.0329986	0	0	0.379981	0.00761008	0	0	0.443923	0.900194
GSM2899203	Pattern C	0	0.0712588	0.0765941	0.0530102	0	0.0729273	0	0	0.0862125	0	0.0827841	0.0446696	0.0514226	0	0	0.154893	0.0515221	0	0	0.254706	0	0	0.65	0.012703	1.09081
GSM2899210	Pattern C	0	0.0631025	0.00407877	0.0385502	0	0.102424	0	0	0.0258606	0	0	0.141569	0.136411	0	0	0.396741	0	0	0	0.0912624	0	0	0.27	0.070065	1.08292
GSM2899214	Pattern C	0	0.0810292	0.0725955	0.285688	0	0	0	0.000683694	0.0177305	0	0	0.212126	0.0591276	0	0	0.221616	0	0	0.0479629	0	0	0.00144138	0.99	-0.0456918	1.1561
GSM2899217	Pattern C	0	0.0837822	0	0.161067	0	0.0699276	0.0362998	0.08213	0	0	0.0359087	0.0120453	0.0325686	0	0.0253236	0.255907	0.000367027	0.0112328	0.192421	0	0	0.00101923	0.53	0.0300743	1.06094
GSM2899224	Pattern C	0	0.0387762	0.0998608	0	0	0.173242	0	0.0799694	0.151886	0	0.115136	0	0.0315575	0	0.00872095	0.212503	0.0354003	0	0.0166399	0.028086	0.00822155	0	0.38	0.0499303	1.06875
GSM2899244	Pattern C	0.0664707	0	0	0.107336	0	0.072715	0	0	0.0923266	0	0	0.0565714	0.0498173	0	0	0.1762	0.0630552	0	0	0.304425	0	0.0110827	0.08	0.169398	1.03235
GSM2899262	Pattern C	0.0698362	0	0	0.0728314	0	0.0797528	0	0.00944839	0.0246972	0	0.0107143	0.00417221	0.153963	0	0.0305902	0.369939	0	0	0.0890842	0.0515651	0.00655678	0.0268493	0	0.353519	0.938008
GSM2899273	Pattern C	0.0380281	0	0.0201751	0.118516	0	0.0732658	0	0.0275012	0	0	7.23395e-05	0.0138256	0.144901	0	0.00241387	0.508776	0.0013508	0.000619228	0	0.0319631	0	0.0185925	0.06	0.202888	1.02062
GSM2899279	Pattern C	0.00634804	0.0542426	0	0.195987	0	0.222626	0	0	0.127224	0	0	0.0931639	0.0424392	0	0.0342229	0.182825	0.03938	0	0	0.00154301	0	0	0.51	0.0325411	1.11087
GSM2899288	Pattern C	0.01103	0.0120997	0	0.0476693	0	0	0.00348682	0.0260895	0	0	0.00474279	0	0.0390141	0.0870719	0.00551976	0.487155	0.0151119	0	0.00586238	0.0155115	0	0.239635	0	0.414403	0.930059
GSM2899328	Pattern C	0	0.0476129	0.036004	0.181931	0	0.226247	0	0	0.0438163	0	0.00429964	0.125288	0.0557312	0.0095389	0.0253923	0.0512029	0.112065	0	0.0808708	0	0	0	0.85	-0.0191897	1.1175
GSM2899356	Pattern C	0	0.0178275	0.00623476	0.0303182	0	0.0425453	0	0.0338194	0.000841946	0	0	0.0731679	0.0172775	0	0	0.270163	0.184826	0	0	0.30319	0.0197888	0	0	0.47935	0.877768
GSM2899365	Pattern C	0.0635208	0	0	0.128641	0	0.0666428	0	0.00679347	0	0	0	0.109241	0.0507848	0	0.0040708	0.411276	0.0328624	0.00088213	0	0.102984	0.0106398	0.0116615	0.24	0.0851871	1.07205
GSM2899367	Pattern C	0.0271706	0	0.00294847	0.132695	0	0.0332026	0	0.0382065	0.00389973	0	0	0.0304646	0.115969	0	0.0618762	0.447908	0.00688579	0	0.072333	0	0	0.0264407	0.05	0.233928	0.997584
GSM2899370	Pattern C	0	0.0658129	0.0430474	0.0416776	0	0.157257	0	0	0.0916369	0	0.11456	0.12849	0.119399	0.0726292	0	0.000753906	0.0528612	0	0.109712	0	0.00216322	0	0.97	-0.034756	1.12345
GSM2899377	Pattern C	0.0314941	0	0.0123153	0.0818162	0	0.0399845	0	0.00662971	0.0215672	0	0.0204638	0.0134104	0.038985	0	0.0160409	0.586163	0.0872548	0	0.0152378	0	0	0.0286373	0.17	0.121549	1.06863
GSM2899389	Pattern C	0.0856795	0	0.112558	0.0801742	0	0	0	0.0715496	0	0	0	0.036773	0.0793644	0	0.00493808	0.423269	0.0383563	0	0	0.0564593	0	0.0108783	0.17	0.119063	1.04508
GSM2899400	Pattern C	0.0661779	0	0	0.0560307	0	0	0	0.0302534	0.0145205	0	0	0.0134608	0.0657847	0	0.0152157	0.608452	0.0248458	0	0	0.074001	0	0.0312577	0.09	0.165534	1.05363
GSM2899403	Pattern C	0	0.00358202	0.00721204	0.0190593	0	0.0753727	0	0.0104133	0	0	0	0.0383982	0.188955	0	0.00521079	0.413259	0.0810061	0	0	0.13962	0	0.0179117	0	0.463736	0.886327
GSM2899410	Pattern C	0	0.0668739	0.0058551	0.0406497	0	0.0395947	0	0.0153243	0.0151135	0	0.0285671	0.0135175	0.067862	0	0.0685592	0.470111	0.0083222	0	0	0.130816	0	0.0288336	0.34	0.0536915	1.08691
GSM2899413	Pattern C	0	0.236239	0	0.174087	0	0	0	0	0.0225417	0	0	0.0812102	0.0601781	0	0	0.275336	0	0	0.150408	0	0	0	0.38	0.0505607	1.06207
GSM2899421	Pattern C	0.0239725	0	0	0.0924367	0	0.0277657	0	0.0304476	0.061834	0	0.0620775	0	0.0132977	0.135561	0.00688292	0.543502	0	0	0	0.00222224	0	0	0.02	0.275613	0.996019
GSM2899429	Pattern C	0.0413974	0	0	0.0505987	0	0.0932001	0	0.000945582	0	0	0.0122788	0.0617735	0.108033	0	0.00328113	0.506041	0.0137554	0	0	0.0794629	0	0.029233	0.08	0.173835	1.03758
GSM2899430	Pattern C	0.0174071	0	0.00031059	0.013535	0	0.0554772	0	0.0992818	0	0	0	0.0715414	0.11467	0	0.0510395	0.270603	0.111883	0	0	0.152976	0.0206195	0.0206557	0.09	0.16452	1.02501
GSM2899434	Pattern C	0.0111013	0	0.00540499	0.0528408	0	0	0	0.0441812	0	0	0	0.0484675	0.152109	0.0152934	0.0340375	0.558873	0.0162657	0	0.0521504	0.00327357	0	0.006002	0.09	0.163475	1.05034
[truncated: 230 more rows]
