# Supplementary material for: DNA methylation regulator-mediated modification patterns and tumor microenvironment characterization in glioma
Source: Aging (Albany NY). 2022 Sep 21;14(19):7824–50. doi: 10.18632/aging.204291 (PMC9596205; doi:10.18632/aging.204291)
Supplement: Supplementary Table 4 [file aging-14-204291-s005.xlsx]

## Sheet: Supplementary Table 4
Supplementary Table 4. The changes of patterns, glioma grade, gene clusters and DMS.
ID	Pattern	GeneCluster	Glioma group	DMS
CGGA.1002	A	A	WHO III	High
CGGA.1003	A	C	WHO II	High
CGGA.1005	A	C	WHO II	High
CGGA.1007	A	B	WHO IV	Low
CGGA.1011	A	B	WHO IV	Low
CGGA.1012	A	B	WHO II	Low
CGGA.1013	A	C	WHO II	High
CGGA.1014	A	A	WHO II	Low
CGGA.1015	A	B	WHO IV	Low
CGGA.1017	A	A	WHO IV	High
CGGA.1022	A	B	WHO II	Low
CGGA.1030	A	A	WHO II	High
CGGA.1031	A	A	WHO II	High
CGGA.1034	A	B	WHO III	Low
CGGA.1035	A	B	WHO IV	Low
CGGA.1041	A	A	WHO IV	Low
CGGA.1048	A	B	WHO II	Low
CGGA.1049	A	B	WHO IV	Low
CGGA.1053	A	B	WHO IV	Low
CGGA.1058	A	A	WHO II	Low
CGGA.1059	A	A	WHO II	Low
CGGA.1061	A	A	WHO III	High
CGGA.1066	A	B	WHO II	Low
CGGA.1071	A	B	WHO II	Low
CGGA.1074	A	B	WHO IV	Low
CGGA.1083	A	B	WHO IV	Low
CGGA.1087	A	A	WHO II	High
CGGA.1099	A	A	WHO IV	Low
CGGA.1109	A	B	WHO IV	Low
CGGA.1111	A	A	WHO III	Low
CGGA.1114	A	B	WHO IV	Low
CGGA.1124	A	B	WHO IV	Low
CGGA.1136	A	B	WHO IV	Low
CGGA.1145	A	B	WHO III	Low
CGGA.1147	A	A	WHO II	High
CGGA.1156	A	A	WHO II	Low
CGGA.1158	A	A	WHO II	High
CGGA.1160	A	B	WHO III	Low
CGGA.1164	A	A	WHO IV	High
CGGA.1172	A	A	WHO IV	High
CGGA.1185	A	A	WHO III	High
CGGA.1191	A	A	WHO III	High
CGGA.1192	A	A	WHO II	Low
CGGA.1197	A	C	WHO IV	High
CGGA.1211	A	A	WHO II	High
CGGA.1215	A	B	WHO III	Low
CGGA.1218	A	B	WHO IV	Low
CGGA.1219	A	C	WHO IV	High
CGGA.1226	A	A	WHO II	Low
CGGA.1227	A	B	WHO IV	Low
CGGA.1232	A	A	WHO III	Low
CGGA.1234	A	B	WHO IV	Low
CGGA.1235	A	A	WHO III	High
CGGA.1236	A	A	WHO IV	High
CGGA.1238	A	B	WHO II	Low
CGGA.1239	A	A	WHO II	High
CGGA.1240	A	B	WHO IV	Low
CGGA.1246	A	A	WHO III	High
CGGA.1248	A	A	WHO IV	Low
CGGA.1255	A	B	WHO IV	Low
CGGA.1257	A	A	WHO IV	High
CGGA.1264	A	A	WHO III	Low
CGGA.1271	A	B	WHO IV	Low
CGGA.1275	A	A	WHO IV	Low
CGGA.1280	A	A	WHO III	Low
CGGA.1282	A	A	WHO IV	Low
CGGA.1284	A	B	WHO III	Low
CGGA.1287	A	A	WHO IV	Low
CGGA.1292	A	A	WHO III	High
CGGA.1300	A	A	WHO III	Low
CGGA.1307	A	B	WHO III	Low
CGGA.1318	A	A	WHO II	Low
CGGA.1322	A	A	WHO III	High
CGGA.1324	A	A	WHO IV	High
CGGA.1326	A	A	WHO IV	Low
CGGA.1334	A	A	WHO II	Low
CGGA.1338	A	B	WHO IV	Low
CGGA.1339	A	A	WHO II	Low
CGGA.1359	A	A	WHO III	Low
CGGA.1361	A	A	WHO II	High
CGGA.1362	A	A	WHO III	Low
CGGA.1374	A	B	WHO III	Low
CGGA.1384	A	A	WHO IV	Low
CGGA.1388	A	A	WHO III	Low
CGGA.139	A	A	WHO IV	Low
CGGA.1391	A	B	WHO IV	Low
CGGA.1394	A	A	WHO IV	Low
CGGA.1398	A	A	WHO III	Low
CGGA.1401	A	A	WHO III	Low
CGGA.1406	A	A	WHO II	Low
CGGA.1408	A	B	WHO III	Low
CGGA.1409	A	A	WHO IV	Low
CGGA.1412	A	A	WHO IV	Low
CGGA.1415	A	B	WHO IV	Low
CGGA.1434	A	B	WHO III	Low
CGGA.1440	A	A	WHO II	High
CGGA.1450	A	A	WHO IV	High
CGGA.1451	A	B	WHO IV	Low
CGGA.1452	A	B	WHO IV	Low
CGGA.1463	A	A	WHO II	High
CGGA.1471	A	A	WHO II	Low
CGGA.1476	A	A	WHO IV	Low
CGGA.1480	A	B	WHO IV	Low
CGGA.1487	A	B	WHO III	Low
CGGA.1507	A	B	WHO IV	Low
CGGA.1516	A	A	WHO II	High
CGGA.1517	A	C	WHO II	High
CGGA.1518	A	A	WHO III	Low
CGGA.1523	A	B	WHO II	Low
CGGA.1524	A	A	WHO III	High
CGGA.1527	A	A	WHO III	High
CGGA.1537	A	B	WHO IV	Low
CGGA.1541	A	A	WHO IV	Low
CGGA.1544	A	A	WHO III	High
CGGA.1548	A	A	WHO IV	Low
CGGA.1552	A	C	WHO III	High
CGGA.1553	A	A	WHO III	Low
CGGA.1559	A	A	WHO IV	High
CGGA.1562	A	C	WHO III	High
CGGA.1563	A	B	WHO II	Low
CGGA.1580	A	A	WHO III	Low
CGGA.1589	A	A	WHO II	Low
CGGA.1596	A	A	WHO IV	Low
CGGA.1597	A	B	WHO IV	Low
CGGA.1607	A	A	WHO II	Low
CGGA.1608	A	B	WHO III	Low
CGGA.1611	A	B	WHO IV	Low
CGGA.1619	A	C	WHO III	High
CGGA.1623	A	A	WHO III	Low
CGGA.1626	A	B	WHO IV	Low
CGGA.1631	A	A	WHO IV	Low
CGGA.1634	A	B	WHO IV	Low
CGGA.1644	A	C	WHO IV	High
CGGA.1650	A	A	WHO IV	Low
CGGA.1667	A	A	WHO III	High
CGGA.1670	A	B	WHO III	Low
CGGA.1673	A	A	WHO II	High
CGGA.1680	A	A	WHO III	Low
CGGA.1688	A	A	WHO III	Low
CGGA.1689	A	A	WHO II	High
CGGA.1697	A	A	WHO IV	Low
CGGA.1718	A	A	WHO III	High
CGGA.1723	A	C	WHO III	High
CGGA.1736	A	B	WHO IV	Low
CGGA.1739	A	A	WHO III	Low
CGGA.1740	A	A	WHO IV	High
CGGA.1750	A	A	WHO IV	High
CGGA.1764	A	B	WHO IV	Low
CGGA.1769	A	A	WHO IV	Low
CGGA.1776	A	B	WHO IV	Low
CGGA.1786	A	C	WHO III	High
CGGA.1809	A	A	WHO III	Low
CGGA.1840	A	B	WHO IV	Low
CGGA.1850	A	A	WHO II	High
CGGA.1865	A	B	WHO IV	Low
CGGA.1870	A	C	WHO IV	High
CGGA.1886	A	A	WHO IV	Low
CGGA.194	A	A	WHO III	High
CGGA.1972	A	B	WHO IV	Low
CGGA.1976	A	B	WHO IV	Low
CGGA.1985	A	A	WHO IV	High
CGGA.2002	A	A	WHO II	Low
CGGA.2046	A	B	WHO III	Low
CGGA.2047	A	B	WHO IV	Low
CGGA.2056	A	B	WHO IV	Low
CGGA.2075	A	B	WHO IV	Low
CGGA.2079	A	A	WHO III	Low
CGGA.2081	A	A	WHO III	High
CGGA.2082	A	B	WHO IV	Low
CGGA.2115	A	C	WHO IV	High
CGGA.2121	A	B	WHO II	Low
CGGA.2129	A	A	WHO III	High
CGGA.243	A	A	WHO II	High
CGGA.245	A	A	WHO III	Low
CGGA.251	A	A	WHO II	High
CGGA.252	A	A	WHO II	High
CGGA.254	A	A	WHO II	High
CGGA.265	A	A	WHO II	Low
CGGA.267	A	C	WHO II	High
CGGA.273	A	A	WHO II	High
CGGA.276	A	A	WHO II	High
CGGA.279	A	A	WHO III	Low
CGGA.288	A	A	WHO II	Low
CGGA.290	A	A	WHO II	Low
CGGA.300	A	A	WHO II	High
CGGA.314	A	A	WHO III	High
CGGA.318	A	B	WHO IV	Low
CGGA.320	A	A	WHO II	Low
CGGA.330	A	B	WHO III	Low
CGGA.333	A	A	WHO II	High
CGGA.336	A	A	WHO III	Low
CGGA.337	A	A	WHO III	High
CGGA.413	A	B	WHO IV	Low
CGGA.42	A	A	WHO II	Low
CGGA.426	A	B	WHO III	Low
CGGA.431	A	A	WHO III	High
CGGA.446	A	A	WHO II	High
CGGA.448	A	B	WHO III	Low
CGGA.458	A	A	WHO II	High
CGGA.479	A	C	WHO II	High
CGGA.482	A	B	WHO II	Low
CGGA.485	A	A	WHO II	High
CGGA.490	A	C	WHO III	High
CGGA.491	A	A	WHO IV	High
CGGA.493	A	A	WHO II	High
CGGA.501	A	A	WHO II	High
CGGA.502	A	C	WHO II	High
CGGA.503	A	A	WHO II	High
CGGA.507	A	A	WHO III	Low
CGGA.510	A	A	WHO III	High
CGGA.518	A	A	WHO IV	High
CGGA.551	A	C	WHO II	High
CGGA.560	A	A	WHO III	High
CGGA.564	A	B	WHO III	Low
CGGA.578	A	A	WHO III	Low
CGGA.580	A	A	WHO II	High
CGGA.591	A	A	WHO III	High
CGGA.598	A	A	WHO III	High
CGGA.599	A	A	WHO III	Low
CGGA.601	A	C	WHO II	High
CGGA.603	A	A	WHO III	Low
CGGA.605	A	B	WHO III	Low
CGGA.607	A	A	WHO II	Low
CGGA.616	A	B	WHO III	Low
CGGA.619	A	A	WHO II	Low
CGGA.630	A	A	WHO III	High
CGGA.632	A	A	WHO II	High
CGGA.634	A	A	WHO III	Low
CGGA.635	A	A	WHO II	High
CGGA.638	A	C	WHO II	High
CGGA.641	A	A	WHO III	High
CGGA.662	A	A	WHO II	High
CGGA.663	A	A	WHO II	High
CGGA.666	A	A	WHO II	High
CGGA.671	A	A	WHO II	High
CGGA.675	A	A	WHO II	High
CGGA.680	A	A	WHO IV	Low
CGGA.689	A	A	WHO II	High
CGGA.698	A	A	WHO II	High
CGGA.700	A	A	WHO IV	Low
CGGA.703	A	B	WHO III	Low
CGGA.704	A	A	WHO II	High
CGGA.720	A	A	WHO II	High
CGGA.721	A	A	WHO II	Low
CGGA.725	A	A	WHO II	High
CGGA.727	A	B	WHO III	Low
CGGA.730	A	A	WHO II	Low
CGGA.731	A	B	WHO IV	Low
CGGA.752	A	A	WHO II	High
CGGA.757	A	A	WHO II	High
CGGA.761	A	A	WHO IV	High
CGGA.762	A	C	WHO II	High
CGGA.763	A	A	WHO III	High
CGGA.780	A	A	WHO III	Low
CGGA.796	A	A	WHO II	Low
CGGA.799	A	A	WHO III	High
CGGA.802	A	B	WHO IV	Low
CGGA.804	A	A	WHO IV	High
CGGA.808	A	A	WHO IV	Low
CGGA.810	A	B	WHO III	Low
CGGA.815	A	A	WHO II	Low
CGGA.818	A	A	WHO II	Low
CGGA.822	A	A	WHO IV	High
CGGA.825	A	A	WHO III	Low
CGGA.838	A	A	WHO II	High
CGGA.842	A	B	WHO IV	Low
CGGA.843	A	A	WHO II	High
CGGA.852	A	B	WHO III	Low
CGGA.858	A	C	WHO II	High
CGGA.859	A	B	WHO IV	Low
CGGA.861	A	B	WHO III	Low
CGGA.863	A	A	WHO II	Low
CGGA.864	A	A	WHO II	High
CGGA.871	A	A	WHO II	High
CGGA.876	A	B	WHO IV	Low
CGGA.882	A	A	WHO III	Low
CGGA.889	A	A	WHO II	High
CGGA.892	A	C	WHO II	High
CGGA.893	A	C	WHO II	High
CGGA.905	A	A	WHO II	High
CGGA.908	A	A	WHO II	High
CGGA.909	A	A	WHO II	High
CGGA.D03	A	B	WHO IV	Low
CGGA.D16	A	B	WHO III	Low
CGGA.D24	A	A	WHO III	High
CGGA.D27	A	A	WHO III	High
CGGA.D28	A	A	WHO III	High
CGGA.D33	A	A	WHO III	Low
CGGA.D37	A	B	WHO IV	Low
CGGA.D38	A	A	WHO IV	Low
CGGA.D47	A	B	WHO II	Low
CGGA.D48	A	A	WHO III	High
CGGA.D51	A	B	WHO IV	Low
CGGA.D56	A	A	WHO III	Low
CGGA.J024	A	A	WHO II	High
CGGA.J030	A	A	WHO II	High
CGGA.J042	A	B	WHO II	Low
CGGA.P112	A	A	WHO IV	Low
CGGA.P113	A	A	WHO II	High
CGGA.P122	A	A	WHO II	Low
CGGA.P142	A	A	WHO III	Low
CGGA.P144	A	A	WHO III	Low
CGGA.P145	A	A	WHO II	High
CGGA.P155	A	B	WHO II	Low
CGGA.P20	A	A	WHO II	Low
CGGA.P286	A	A	WHO II	High
CGGA.P295	A	B	WHO IV	Low
CGGA.P306	A	A	WHO II	High
CGGA.P337	A	B	WHO III	Low
CGGA.P338	A	A	WHO II	Low
CGGA.P364	A	A	WHO III	Low
CGGA.P388	A	B	WHO III	Low
CGGA.P392	A	A	WHO II	Low
CGGA.P401	A	B	WHO IV	Low
CGGA.P416	A	A	WHO III	Low
CGGA.P422	A	A	WHO II	High
CGGA.P437	A	A	WHO III	Low
CGGA.P438	A	B	WHO III	Low
CGGA.P439	A	B	WHO II	Low
CGGA.P461	A	B	WHO III	Low
CGGA.P468	A	A	WHO III	High
CGGA.P5	A	B	WHO III	Low
CGGA.P500	A	A	WHO II	Low
CGGA.P501	A	A	WHO II	Low
CGGA.P505	A	A	WHO II	High
CGGA.P508	A	A	WHO III	Low
CGGA.P510	A	B	WHO III	Low
CGGA.P520	A	A	WHO III	Low
CGGA.P568	A	A	WHO III	High
CGGA.P619	A	B	WHO IV	Low
CGGA.P625	A	B	WHO IV	Low
CGGA.P633	A	B	WHO III	Low
CGGA.P7	A	B	WHO IV	Low
CGGA.P83	A	A	WHO II	High
GSM2899178	A	A	WHO II	Low
GSM2899181	A	A	WHO III	Low
GSM2899182	A	A	WHO III	High
GSM2899183	A	A	WHO II	High
GSM2899185	A	A	WHO III	Low
GSM2899189	A	B	WHO III	Low
GSM2899190	A	B	WHO II	Low
GSM2899191	A	A	WHO III	High
GSM2899192	A	A	WHO II	High
GSM2899193	A	A	WHO III	High
GSM2899199	A	C	WHO III	High
GSM2899201	A	A	WHO III	Low
GSM2899202	A	A	WHO II	Low
GSM2899205	A	A	WHO III	Low
GSM2899208	A	A	WHO III	High
GSM2899212	A	A	WHO III	High
GSM2899215	A	A	WHO II	High
GSM2899216	A	A	WHO III	High
GSM2899218	A	A	WHO III	Low
GSM2899231	A	A	WHO II	Low
GSM2899234	A	C	WHO III	High
GSM2899235	A	A	WHO III	High
GSM2899237	A	C	WHO III	High
GSM2899238	A	C	WHO II	High
GSM2899239	A	C	WHO II	High
GSM2899240	A	A	WHO III	High
GSM2899241	A	A	WHO III	Low
GSM2899243	A	A	WHO III	High
GSM2899245	A	A	WHO III	High
GSM2899246	A	C	WHO II	High
GSM2899247	A	C	WHO II	High
GSM2899248	A	A	WHO II	Low
GSM2899251	A	C	WHO II	High
GSM2899252	A	A	WHO III	High
GSM2899253	A	A	WHO II	Low
GSM2899256	A	A	WHO II	High
GSM2899257	A	A	WHO II	Low
GSM2899259	A	A	WHO II	High
GSM2899261	A	A	WHO II	High
GSM2899263	A	C	WHO II	High
GSM2899264	A	C	WHO II	High
GSM2899266	A	A	WHO II	Low
GSM2899268	A	A	WHO II	High
GSM2899269	A	C	WHO II	High
GSM2899270	A	C	WHO II	High
GSM2899271	A	A	WHO II	High
GSM2899272	A	A	WHO II	High
GSM2899276	A	A	WHO III	High
GSM2899278	A	A	WHO II	High
GSM2899282	A	A	WHO II	High
GSM2899283	A	A	WHO III	High
GSM2899285	A	A	WHO III	High
GSM2899286	A	A	WHO II	High
GSM2899289	A	B	WHO III	Low
GSM2899290	A	B	WHO III	Low
GSM2899292	A	A	WHO III	High
GSM2899293	A	A	WHO II	Low
GSM2899295	A	A	WHO II	High
GSM2899296	A	A	WHO II	High
GSM2899298	A	A	WHO II	Low
GSM2899301	A	A	WHO II	High
GSM2899302	A	A	WHO II	Low
GSM2899303	A	A	WHO III	Low
GSM2899304	A	A	WHO II	High
GSM2899305	A	A	WHO III	High
GSM2899306	A	A	WHO II	High
GSM2899308	A	A	WHO III	High
GSM2899309	A	A	WHO II	High
GSM2899310	A	A	WHO II	High
GSM2899311	A	A	WHO II	High
GSM2899312	A	A	WHO III	Low
GSM2899313	A	A	WHO III	High
GSM2899314	A	A	WHO II	High
GSM2899315	A	A	WHO II	High
GSM2899316	A	A	WHO III	High
GSM2899317	A	A	WHO II	High
GSM2899318	A	A	WHO II	High
GSM2899319	A	A	WHO III	High
GSM2899321	A	A	WHO III	High
GSM2899322	A	A	WHO III	High
GSM2899323	A	C	WHO III	High
GSM2899325	A	A	WHO III	High
GSM2899329	A	B	WHO IV	Low
GSM2899330	A	B	WHO IV	Low
GSM2899333	A	B	WHO IV	Low
GSM2899334	A	B	WHO IV	Low
GSM2899335	A	B	WHO IV	Low
GSM2899336	A	B	WHO IV	Low
GSM2899337	A	B	WHO IV	Low
GSM2899338	A	B	WHO IV	Low
GSM2899340	A	A	WHO IV	Low
GSM2899341	A	A	WHO IV	Low
GSM2899348	A	B	WHO IV	Low
GSM2899359	A	A	WHO IV	High
GSM2899360	A	A	WHO IV	High
GSM2899362	A	A	WHO IV	High
GSM2899363	A	A	WHO IV	Low
GSM2899364	A	A	WHO IV	Low
GSM2899368	A	B	WHO IV	Low
GSM2899372	A	B	WHO IV	Low
GSM2899373	A	B	WHO IV	Low
GSM2899374	A	A	WHO IV	Low
GSM2899375	A	A	WHO IV	High
GSM2899376	A	B	WHO IV	Low
GSM2899378	A	A	WHO IV	Low
GSM2899379	A	B	WHO IV	Low
GSM2899381	A	B	WHO IV	Low
GSM2899383	A	B	WHO IV	Low
GSM2899385	A	A	WHO IV	Low
GSM2899386	A	A	WHO IV	Low
GSM2899387	A	B	WHO IV	Low
GSM2899390	A	A	WHO IV	Low
GSM2899391	A	A	WHO IV	High
GSM2899392	A	B	WHO IV	Low
GSM2899394	A	B	WHO IV	Low
GSM2899395	A	B	WHO IV	Low
GSM2899398	A	B	WHO IV	Low
GSM2899401	A	B	WHO IV	Low
GSM2899402	A	A	WHO IV	Low
GSM2899404	A	A	WHO IV	Low
GSM2899411	A	B	WHO IV	Low
GSM2899412	A	A	WHO IV	Low
GSM2899414	A	A	WHO IV	High
GSM2899415	A	C	WHO IV	High
GSM2899416	A	A	WHO IV	Low
GSM2899418	A	A	WHO IV	Low
GSM2899419	A	B	WHO IV	Low
GSM2899422	A	B	WHO IV	Low
GSM2899424	A	C	WHO IV	High
GSM2899433	A	B	WHO IV	Low
GSM2899439	A	A	WHO IV	Low
GSM2899442	A	C	WHO IV	High
GSM2899447	A	B	WHO IV	Low
GSM2899448	A	A	WHO IV	High
GSM2899453	A	B	WHO IV	Low
GSM2899456	A	B	WHO IV	Low
GSM2899457	A	B	WHO IV	Low
GSM2899459	A	B	WHO IV	Low
GSM2899462	A	A	WHO IV	High
GSM2899463	A	B	WHO IV	Low
GSM2899464	A	B	WHO IV	Low
GSM2899465	A	A	WHO IV	Low
GSM2899468	A	B	WHO IV	Low
GSM2899476	A	B	WHO IV	Low
GSM2899479	A	A	WHO IV	Low
GSM2899480	A	B	WHO IV	Low
GSM2899481	A	C	WHO IV	High
GSM2899482	A	A	WHO IV	Low
GSM2899488	A	A	WHO IV	Low
GSM2899489	A	B	WHO IV	Low
GSM2899490	A	B	WHO IV	Low
GSM2899491	A	A	WHO IV	High
GSM2899494	A	B	WHO IV	Low
GSM2899498	A	A	WHO IV	High
GSM2899499	A	B	WHO IV	Low
GSM2899503	A	A	WHO IV	Low
GSM2899510	A	B	WHO IV	Low
GSM2899517	A	B	WHO IV	Low
GSM2899519	A	B	WHO IV	Low
GSM2899522	A	A	WHO IV	High
GSM2899523	A	B	WHO IV	Low
GSM2899528	A	B	WHO IV	Low
GSM2899530	A	A	WHO IV	Low
GSM2899531	A	B	WHO IV	Low
GSM2899532	A	B	WHO IV	Low
GSM2899533	A	A	WHO IV	Low
GSM2899539	A	C	WHO IV	High
GSM2899540	A	A	WHO IV	High
GSM2899542	A	B	WHO IV	Low
GSM2899543	A	B	WHO IV	Low
GSM2899544	A	B	WHO IV	Low
GSM2899549	A	A	WHO III	Low
GSM2899550	A	A	WHO II	High
GSM2899551	A	A	WHO III	High
GSM2899552	A	A	WHO II	High
GSM2899553	A	B	WHO III	Low
GSM2899554	A	A	WHO II	High
GSM2899587	A	A	WHO II	High
GSM2899590	A	A	WHO II	High
GSM2899591	A	A	WHO II	High
GSM2899592	A	A	WHO III	High
GSM2899594	A	A	WHO III	High
GSM2899595	A	A	WHO III	High
GSM2899596	A	A	WHO III	High
GSM2899597	A	A	WHO II	High
GSM2899600	A	A	WHO III	Low
GSM2899601	A	A	WHO II	Low
GSM2899603	A	C	WHO III	High
GSM2899604	A	A	WHO II	High
GSM2899605	A	A	WHO II	High
GSM2899606	A	A	WHO II	High
GSM2899608	A	A	WHO II	High
GSM2899609	A	A	WHO II	High
GSM2899610	A	A	WHO II	High
GSM2899611	A	C	WHO III	High
GSM2899617	A	A	WHO II	High
GSM2899618	A	A	WHO II	High
GSM2899629	A	A	WHO II	High
GSM2899630	A	B	WHO II	Low
GSM2899631	A	B	WHO III	Low
GSM2899632	A	B	WHO II	Low
GSM2899636	A	A	WHO II	High
GSM2899638	A	A	WHO II	High
GSM2899639	A	A	WHO II	High
GSM2899640	A	A	WHO II	High
GSM2899641	A	A	WHO III	Low
GSM2899642	A	B	WHO III	Low
GSM2899644	A	A	WHO II	High
GSM2899645	A	A	WHO III	High
GSM2899647	A	A	WHO II	Low
GSM2899648	A	A	WHO III	High
GSM2899650	A	A	WHO III	Low
GSM2899652	A	A	WHO III	High
GSM405202	A	A	WHO III	High
GSM405203	A	A	WHO III	High
GSM405204	A	A	WHO III	High
GSM405205	A	B	WHO III	Low
GSM405206	A	A	WHO III	High
GSM405207	A	A	WHO III	High
GSM405208	A	A	WHO III	High
GSM405211	A	A	WHO III	High
GSM405212	A	A	WHO III	High
GSM405213	A	B	WHO IV	Low
GSM405217	A	A	WHO IV	Low
GSM405219	A	B	WHO IV	Low
GSM405221	A	B	WHO IV	Low
GSM405222	A	C	WHO IV	High
GSM405223	A	A	WHO IV	Low
GSM405224	A	A	WHO IV	Low
GSM405225	A	A	WHO III	Low
GSM405226	A	B	WHO III	Low
GSM405227	A	A	WHO III	High
GSM405228	A	B	WHO IV	Low
GSM405229	A	B	WHO IV	Low
GSM405233	A	B	WHO IV	Low
GSM405235	A	B	WHO IV	Low
GSM405236	A	B	WHO IV	Low
GSM405237	A	B	WHO IV	Low
GSM405238	A	A	WHO IV	Low
GSM405240	A	A	WHO IV	Low
GSM405241	A	B	WHO IV	Low
GSM405243	A	A	WHO IV	Low
GSM405244	A	C	WHO IV	High
GSM405245	A	A	WHO IV	Low
GSM405246	A	A	WHO IV	High
GSM405248	A	B	WHO IV	Low
GSM405249	A	A	WHO IV	High
GSM405251	A	A	WHO IV	High
GSM405252	A	B	WHO IV	Low
GSM405255	A	B	WHO IV	Low
GSM405258	A	A	WHO II	High
GSM405261	A	A	WHO III	Low
GSM405263	A	B	WHO IV	Low
GSM405264	A	B	WHO IV	Low
GSM405265	A	A	WHO III	Low
GSM405266	A	B	WHO IV	Low
GSM405268	A	A	WHO IV	Low
GSM405269	A	A	WHO IV	Low
GSM405270	A	B	WHO IV	Low
GSM405271	A	A	WHO IV	Low
GSM405273	A	B	WHO III	Low
GSM405274	A	B	WHO IV	Low
GSM405275	A	A	WHO IV	High
GSM405276	A	B	WHO IV	Low
GSM405277	A	A	WHO III	Low
GSM405280	A	B	WHO IV	Low
GSM405281	A	A	WHO III	Low
GSM405282	A	B	WHO IV	Low
GSM405283	A	A	WHO III	High
GSM405287	A	A	WHO III	High
GSM405290	A	B	WHO IV	Low
GSM405291	A	C	WHO III	High
GSM405294	A	B	WHO IV	Low
GSM405295	A	A	WHO III	High
GSM405296	A	A	WHO IV	High
GSM405297	A	A	WHO IV	Low
GSM405298	A	A	WHO III	High
GSM405300	A	A	WHO III	High
GSM405301	A	B	WHO IV	Low
GSM405302	A	B	WHO IV	Low
GSM405304	A	B	WHO IV	Low
GSM405305	A	B	WHO IV	Low
GSM405306	A	A	WHO II	High
GSM405309	A	B	WHO IV	Low
GSM405310	A	A	WHO III	High
GSM405313	A	A	WHO IV	Low
GSM405314	A	B	WHO IV	Low
GSM405317	A	B	WHO IV	Low
GSM405318	A	C	WHO III	High
GSM405319	A	A	WHO III	High
GSM405321	A	A	WHO III	Low
GSM405322	A	B	WHO IV	Low
GSM405324	A	B	WHO IV	Low
GSM405325	A	A	WHO III	High
GSM405327	A	A	WHO III	High
GSM405331	A	A	WHO III	High
GSM405333	A	A	WHO III	High
GSM405338	A	A	WHO II	High
GSM405341	A	B	WHO III	Low
GSM405342	A	C	WHO III	High
GSM405344	A	A	WHO II	High
GSM405353	A	B	WHO IV	Low
GSM405356	A	A	WHO IV	High
GSM405361	A	A	WHO III	Low
GSM405362	A	B	WHO IV	Low
GSM405369	A	A	WHO IV	High
GSM405370	A	A	WHO IV	High
GSM405371	A	B	WHO IV	Low
GSM405373	A	B	WHO IV	Low
GSM405374	A	B	WHO IV	Low
GSM405375	A	B	WHO IV	Low
GSM405376	A	A	WHO IV	Low
GSM405377	A	A	WHO III	Low
GSM405378	A	C	WHO II	High
GSM405379	A	A	WHO IV	Low
GSM405380	A	A	WHO III	High
GSM405381	A	A	WHO III	High
GSM405386	A	A	WHO II	High
GSM405390	A	A	WHO III	Low
GSM405391	A	B	WHO IV	Low
GSM405395	A	A	WHO II	High
GSM405397	A	A	WHO IV	Low
GSM405402	A	A	WHO II	High
GSM405405	A	B	WHO IV	Low
GSM405408	A	A	WHO II	High
GSM405409	A	C	WHO III	High
GSM405411	A	A	WHO III	Low
GSM405412	A	A	WHO IV	Low
GSM405415	A	B	WHO IV	Low
GSM405416	A	B	WHO IV	Low
GSM405418	A	A	WHO IV	High
GSM405419	A	A	WHO IV	Low
GSM405420	A	A	WHO III	High
GSM405422	A	A	WHO IV	Low
GSM405423	A	A	WHO III	Low
GSM405424	A	A	WHO II	High
GSM405425	A	A	WHO II	High
GSM405427	A	A	WHO IV	Low
GSM405428	A	B	WHO IV	Low
GSM405429	A	A	WHO III	High
GSM405430	A	B	WHO IV	Low
GSM405432	A	B	WHO IV	Low
GSM405433	A	A	WHO II	High
GSM405437	A	A	WHO II	High
GSM405439	A	A	WHO II	High
GSM405440	A	B	WHO IV	Low
GSM405441	A	A	WHO II	High
GSM405442	A	B	WHO IV	Low
GSM405443	A	A	WHO IV	Low
GSM405444	A	C	WHO II	High
GSM405445	A	A	WHO III	High
GSM405446	A	B	WHO IV	Low
GSM405447	A	B	WHO IV	Low
GSM405449	A	A	WHO III	High
GSM405450	A	A	WHO III	High
GSM405452	A	A	WHO IV	Low
GSM405453	A	B	WHO IV	Low
GSM405454	A	B	WHO IV	Low
GSM405455	A	B	WHO IV	Low
GSM405458	A	A	WHO IV	Low
GSM405461	A	A	WHO IV	High
GSM405466	A	B	WHO IV	Low
GSM405469	A	A	WHO III	High
GSM405470	A	A	WHO IV	Low
GSM405472	A	A	WHO IV	Low
GSM405473	A	B	WHO IV	Low
GSM405474	A	A	WHO IV	Low
GSM405478	A	C	WHO III	High
GSM405479	A	B	WHO IV	Low
GSM405481	A	A	WHO II	High
TCGA.02.0047.01A	A	B	WHO IV	Low
TCGA.02.0055.01A	A	B	WHO IV	Low
TCGA.06.0168.01A	A	B	WHO IV	Low
TCGA.06.0171.02A	A	B	WHO IV	Low
TCGA.06.0187.01A	A	B	WHO IV	Low
TCGA.06.0644.01A	A	B	WHO IV	Low
TCGA.06.0645.01A	A	B	WHO IV	Low
TCGA.06.0646.01A	A	B	WHO IV	Low
TCGA.06.0878.01A	A	B	WHO IV	Low
TCGA.06.0882.01A	A	B	WHO IV	Low
TCGA.06.2561.01A	A	B	WHO IV	Low
TCGA.06.2562.01A	A	B	WHO IV	Low
TCGA.06.5411.01A	A	B	WHO IV	Low
TCGA.06.5418.01A	A	B	WHO IV	Low
TCGA.12.0616.01A	A	B	WHO IV	Low
TCGA.14.0789.01A	A	B	WHO IV	Low
TCGA.14.2554.01A	A	B	WHO IV	Low
TCGA.15.1444.01A	A	B	WHO IV	Low
TCGA.16.0846.01A	A	B	WHO IV	Low
TCGA.16.1045.01B	A	B	WHO IV	Low
TCGA.19.0957.02A	A	B	WHO IV	Low
TCGA.19.1389.02A	A	B	WHO IV	Low
TCGA.19.2620.01A	A	B	WHO IV	Low
TCGA.26.5136.01B	A	B	WHO IV	Low
TCGA.27.1832.01A	A	B	WHO IV	Low
TCGA.27.1834.01A	A	B	WHO IV	Low
TCGA.27.1837.01A	A	B	WHO IV	Low
TCGA.27.2519.01A	A	B	WHO IV	Low
TCGA.28.5216.01A	A	B	WHO IV	Low
TCGA.28.5220.01A	A	B	WHO IV	Low
TCGA.32.2615.01A	A	B	WHO IV	Low
TCGA.32.5222.01A	A	B	WHO IV	Low
TCGA.41.2571.01A	A	B	WHO IV	Low
TCGA.41.2572.01A	A	B	WHO IV	Low
TCGA.41.4097.01A	A	B	WHO IV	Low
TCGA.76.4926.01B	A	B	WHO IV	Low
TCGA.76.4928.01B	A	B	WHO IV	Low
TCGA.76.4929.01A	A	B	WHO IV	Low
TCGA.CS.4941.01A	A	B	WHO III	Low
TCGA.CS.4942.01A	A	A	WHO III	Low
TCGA.CS.5390.01A	A	A	WHO II	High
TCGA.CS.5393.01A	A	C	WHO III	High
TCGA.CS.5394.01A	A	A	WHO III	High
TCGA.CS.5396.01A	A	A	WHO III	Low
TCGA.CS.5397.01A	A	B	WHO III	Low
TCGA.CS.6290.01A	A	A	WHO III	High
TCGA.CS.6666.01A	A	A	WHO III	Low
TCGA.CS.6667.01A	A	C	WHO II	High
TCGA.CS.6670.01A	A	C	WHO III	High
TCGA.DB.5273.01A	A	A	WHO III	Low
TCGA.DB.5275.01A	A	A	WHO III	Low
TCGA.DB.5277.01A	A	A	WHO III	Low
TCGA.DB.5278.01A	A	A	WHO II	High
TCGA.DB.5279.01A	A	A	WHO II	High
TCGA.DB.5281.01A	A	A	WHO III	Low
TCGA.DB.A4X9.01A	A	A	WHO II	High
TCGA.DB.A4XF.01A	A	A	WHO III	High
TCGA.DB.A4XG.01A	A	A	WHO III	High
TCGA.DB.A64L.01A	A	A	WHO II	High
TCGA.DB.A64P.01A	A	A	WHO III	High
TCGA.DB.A64S.01A	A	A	WHO II	High
TCGA.DB.A64U.01A	A	A	WHO II	High
TCGA.DB.A75L.01A	A	A	WHO III	High
TCGA.DB.A75M.01A	A	C	WHO II	High
TCGA.DH.5142.01A	A	B	WHO III	Low
TCGA.DH.5143.01A	A	A	WHO III	High
TCGA.DH.5144.01A	A	A	WHO III	High
TCGA.DH.A66B.01A	A	A	WHO III	Low
TCGA.DH.A66D.01A	A	A	WHO III	Low
TCGA.DH.A66F.01A	A	A	WHO II	High
TCGA.DH.A66G.01A	A	A	WHO III	Low
TCGA.DH.A7UR.01A	A	A	WHO III	High
TCGA.DH.A7US.01A	A	A	WHO II	High
TCGA.DH.A7UV.01A	A	A	WHO III	High
TCGA.DU.5849.01A	A	C	WHO II	High
TCGA.DU.5853.01A	A	A	WHO II	High
TCGA.DU.5854.01A	A	B	WHO III	Low
TCGA.DU.5855.01A	A	A	WHO III	Low
TCGA.DU.5871.01A	A	A	WHO II	High
TCGA.DU.6399.01A	A	A	WHO II	Low
TCGA.DU.6401.01A	A	C	WHO II	High
TCGA.DU.6408.01A	A	A	WHO III	High
TCGA.DU.7007.01A	A	B	WHO II	Low
TCGA.DU.7008.01A	A	A	WHO II	High
TCGA.DU.7009.01A	A	A	WHO II	High
TCGA.DU.7012.01A	A	B	WHO III	Low
TCGA.DU.7015.01A	A	A	WHO II	High
TCGA.DU.7018.01A	A	A	WHO III	High
TCGA.DU.7019.01A	A	A	WHO III	High
TCGA.DU.7290.01A	A	B	WHO III	Low
TCGA.DU.7292.01A	A	A	WHO III	Low
TCGA.DU.7300.01A	A	A	WHO III	High
TCGA.DU.7301.01A	A	A	WHO II	Low
TCGA.DU.8158.01A	A	B	WHO III	Low
TCGA.DU.8161.01A	A	B	WHO III	Low
TCGA.DU.8162.01A	A	A	WHO III	High
TCGA.DU.8163.01A	A	A	WHO III	Low
TCGA.DU.A5TT.01A	A	A	WHO III	Low
TCGA.DU.A5TW.01A	A	A	WHO III	Low
TCGA.DU.A5TY.01A	A	B	WHO III	Low
TCGA.DU.A6S2.01A	A	C	WHO II	High
TCGA.DU.A6S6.01A	A	C	WHO II	High
TCGA.DU.A6S7.01A	A	A	WHO III	High
TCGA.DU.A6S8.01A	A	A	WHO III	High
TCGA.DU.A76R.01A	A	A	WHO III	High
TCGA.DU.A7T6.01A	A	A	WHO III	High
TCGA.DU.A7T8.01A	A	A	WHO III	High
TCGA.DU.A7TI.01A	A	A	WHO III	Low
TCGA.E1.5302.01A	A	A	WHO III	Low
TCGA.E1.5303.01A	A	A	WHO III	High
TCGA.E1.5305.01A	A	A	WHO III	High
TCGA.E1.5307.01A	A	A	WHO III	High
TCGA.E1.5319.01A	A	A	WHO II	High
TCGA.E1.A7YH.01A	A	A	WHO III	High
TCGA.E1.A7YM.01A	A	A	WHO III	High
TCGA.E1.A7YN.01A	A	B	WHO III	Low
TCGA.E1.A7YO.01A	A	A	WHO III	High
TCGA.E1.A7YU.01A	A	C	WHO III	High
TCGA.E1.A7Z2.01A	A	C	WHO II	High
TCGA.E1.A7Z4.01A	A	A	WHO II	High
TCGA.E1.A7Z6.01A	A	A	WHO II	High
TCGA.F6.A8O3.01A	A	A	WHO II	High
TCGA.F6.A8O4.01A	A	C	WHO II	High
TCGA.FG.5962.01B	A	A	WHO III	High
TCGA.FG.6688.01A	A	A	WHO III	Low
TCGA.FG.6689.01A	A	C	WHO II	High
TCGA.FG.6690.01A	A	A	WHO II	High
TCGA.FG.6692.01A	A	B	WHO III	Low
TCGA.FG.7636.01A	A	A	WHO III	High
TCGA.FG.7637.01A	A	A	WHO II	High
TCGA.FG.7641.01B	A	A	WHO II	High
TCGA.FG.8185.01A	A	A	WHO III	High
TCGA.FG.8186.01A	A	A	WHO III	Low
TCGA.FG.8187.01A	A	C	WHO II	High
TCGA.FG.8188.01A	A	A	WHO II	High
TCGA.FG.8191.01A	A	A	WHO III	Low
TCGA.FG.A4MY.01A	A	A	WHO II	High
TCGA.FG.A60J.01A	A	A	WHO II	High
TCGA.FG.A70Y.01A	A	C	WHO II	High
TCGA.FG.A70Z.01A	A	B	WHO III	Low
TCGA.FG.A710.01A	A	A	WHO II	High
TCGA.FG.A87Q.01A	A	A	WHO III	Low
TCGA.HT.7467.01A	A	C	WHO II	High
TCGA.HT.7470.01A	A	A	WHO III	High
TCGA.HT.7472.01A	A	A	WHO II	Low
TCGA.HT.7473.01A	A	A	WHO II	Low
TCGA.HT.7475.01A	A	A	WHO III	High
TCGA.HT.7478.01A	A	A	WHO II	Low
TCGA.HT.7481.01A	A	A	WHO II	High
TCGA.HT.7482.01A	A	A	WHO II	High
TCGA.HT.7483.01A	A	A	WHO II	High
TCGA.HT.7485.01A	A	A	WHO II	High
TCGA.HT.7601.01A	A	B	WHO III	Low
TCGA.HT.7607.01A	A	C	WHO II	High
TCGA.HT.7609.01A	A	A	WHO III	High
TCGA.HT.7610.01A	A	A	WHO II	High
TCGA.HT.7611.01A	A	A	WHO II	Low
TCGA.HT.7616.01A	A	A	WHO III	Low
TCGA.HT.7620.01A	A	A	WHO III	High
TCGA.HT.7676.01A	A	A	WHO II	High
TCGA.HT.7680.01A	A	A	WHO II	Low
TCGA.HT.7686.01A	A	A	WHO III	Low
TCGA.HT.7688.01A	A	A	WHO III	High
TCGA.HT.7689.01A	A	A	WHO II	Low
TCGA.HT.7693.01A	A	B	WHO II	Low
TCGA.HT.7694.01A	A	C	WHO III	High
TCGA.HT.7695.01A	A	A	WHO II	High
TCGA.HT.7854.01A	A	A	WHO II	Low
TCGA.HT.7855.01A	A	A	WHO III	High
TCGA.HT.7857.01A	A	B	WHO III	Low
TCGA.HT.7874.01A	A	C	WHO III	High
TCGA.HT.7875.01A	A	A	WHO II	High
TCGA.HT.7877.01A	A	A	WHO II	High
TCGA.HT.7881.01A	A	C	WHO II	High
TCGA.HT.7882.01A	A	B	WHO III	Low
TCGA.HT.7884.01B	A	A	WHO II	High
TCGA.HT.7902.01A	A	A	WHO II	High
TCGA.HT.8018.01A	A	A	WHO II	Low
TCGA.HT.8105.01A	A	A	WHO III	High
TCGA.HT.8108.01A	A	A	WHO II	High
TCGA.HT.8109.01A	A	A	WHO III	High
TCGA.HT.8110.01A	A	B	WHO III	Low
TCGA.HT.8111.01A	A	A	WHO III	Low
TCGA.HT.8114.01A	A	A	WHO III	Low
TCGA.HT.8563.01A	A	B	WHO III	Low
TCGA.HT.8564.01A	A	B	WHO III	Low
TCGA.HT.A5R7.01A	A	C	WHO III	High
TCGA.HT.A5R9.01A	A	A	WHO III	High
TCGA.HT.A5RB.01A	A	A	WHO II	High
TCGA.HT.A614.01A	A	A	WHO II	High
TCGA.HT.A615.01A	A	A	WHO II	High
TCGA.HT.A617.01A	A	A	WHO II	Low
TCGA.HT.A61B.01A	A	B	WHO III	Low
TCGA.HT.A74J.01A	A	A	WHO II	High
TCGA.HT.A74L.01A	A	A	WHO II	High
TCGA.HW.7486.01A	A	A	WHO II	High
TCGA.HW.7487.01A	A	A	WHO II	High
TCGA.HW.7489.01A	A	C	WHO II	High
TCGA.HW.7490.01A	A	C	WHO II	High
TCGA.HW.7493.01A	A	A	WHO II	High
TCGA.HW.7495.01A	A	A	WHO II	High
TCGA.HW.8320.01A	A	A	WHO III	High
TCGA.HW.8321.01A	A	A	WHO III	High
TCGA.HW.A5KK.01A	A	A	WHO III	Low
TCGA.HW.A5KM.01A	A	A	WHO II	Low
TCGA.IK.7675.01A	A	A	WHO II	Low
TCGA.IK.8125.01A	A	A	WHO III	High
TCGA.KT.A74X.01A	A	A	WHO III	High
TCGA.P5.A5ET.01A	A	A	WHO II	High
TCGA.P5.A5EV.01A	A	A	WHO II	High
TCGA.P5.A5EW.01A	A	A	WHO II	High
TCGA.P5.A5F0.01A	A	A	WHO II	High
TCGA.P5.A5F2.01A	A	C	WHO II	High
TCGA.P5.A72Z.01A	A	A	WHO III	High
TCGA.P5.A730.01A	A	A	WHO III	High
TCGA.P5.A735.01A	A	A	WHO II	High
TCGA.P5.A77W.01A	A	C	WHO III	High
TCGA.P5.A77X.01A	A	C	WHO II	High
TCGA.P5.A780.01A	A	C	WHO III	High
TCGA.P5.A781.01A	A	C	WHO III	High
TCGA.QH.A65Z.01A	A	A	WHO II	High
TCGA.QH.A6CW.01A	A	A	WHO III	High
TCGA.QH.A6CZ.01A	A	A	WHO II	High
TCGA.QH.A6X3.01A	A	A	WHO II	High
TCGA.QH.A6X4.01A	A	A	WHO III	High
TCGA.QH.A6X8.01A	A	A	WHO III	High
TCGA.QH.A6X9.01A	A	A	WHO II	High
TCGA.QH.A6XA.01A	A	A	WHO II	High
TCGA.QH.A6XC.01A	A	A	WHO III	Low
TCGA.QH.A870.01A	A	A	WHO III	High
TCGA.R8.A6MK.01A	A	A	WHO II	High
TCGA.RY.A83Y.01A	A	C	WHO II	High
TCGA.RY.A840.01A	A	A	WHO III	High
TCGA.RY.A843.01A	A	C	WHO III	High
TCGA.RY.A845.01A	A	A	WHO II	High
TCGA.S9.A6TV.01A	A	B	WHO III	Low
TCGA.S9.A6TX.01A	A	C	WHO III	High
TCGA.S9.A6TY.01A	A	C	WHO II	High
TCGA.S9.A6U2.01A	A	A	WHO II	High
TCGA.S9.A6U5.01A	A	A	WHO II	High
TCGA.S9.A6U8.01A	A	A	WHO II	High
TCGA.S9.A6U9.01A	A	C	WHO III	High
TCGA.S9.A6WE.01A	A	A	WHO II	High
TCGA.S9.A6WG.01A	A	B	WHO III	Low
TCGA.S9.A6WL.01A	A	A	WHO III	High
TCGA.S9.A6WN.01A	A	B	WHO III	Low
TCGA.S9.A6WP.01A	A	A	WHO III	High
TCGA.S9.A7IX.01A	A	B	WHO III	Low
TCGA.S9.A7IY.01A	A	C	WHO III	High
TCGA.S9.A7J1.01A	A	A	WHO II	High
TCGA.S9.A7J2.01A	A	A	WHO III	High
TCGA.S9.A7QW.01A	A	A	WHO III	High
TCGA.S9.A7QZ.01A	A	A	WHO II	High
TCGA.S9.A7R3.01A	A	A	WHO II	High
TCGA.S9.A7R4.01A	A	A	WHO III	High
TCGA.S9.A7R7.01A	A	B	WHO II	Low
TCGA.S9.A89V.01A	A	B	WHO III	Low
TCGA.TM.A7CA.01A	A	A	WHO II	High
TCGA.TM.A84C.01A	A	B	WHO II	Low
TCGA.TM.A84L.01A	A	A	WHO II	High
TCGA.TM.A84O.01A	A	A	WHO III	High
TCGA.TM.A84S.01A	A	A	WHO III	High
TCGA.TM.A84T.01A	A	A	WHO II	High
TCGA.TQ.A7RF.01A	A	A	WHO III	Low
TCGA.TQ.A7RG.01A	A	A	WHO II	High
TCGA.TQ.A7RH.01A	A	A	WHO II	High
TCGA.TQ.A7RI.01A	A	A	WHO II	High
TCGA.TQ.A7RJ.01A	A	A	WHO II	High
TCGA.TQ.A7RN.01A	A	A	WHO II	High
TCGA.TQ.A7RR.01A	A	A	WHO II	High
TCGA.TQ.A7RW.01A	A	A	WHO II	Low
TCGA.VM.A8CB.01A	A	A	WHO III	High
TCGA.VM.A8CD.01A	A	B	WHO III	Low
TCGA.VM.A8CE.01A	A	A	WHO II	High
TCGA.VM.A8CH.01A	A	A	WHO II	High
TCGA.VV.A829.01A	A	A	WHO III	High
TCGA.VW.A7QS.01A	A	A	WHO III	High
TCGA.VW.A8FI.01A	A	C	WHO III	High
TCGA.W9.A837.01A	A	A	WHO II	High
TCGA.WY.A85B.01A	A	A	WHO II	High
TCGA.WY.A85C.01A	A	C	WHO II	High
TCGA.WY.A85D.01A	A	C	WHO II	High
TCGA.WY.A85E.01A	A	A	WHO II	High
CGGA.1006	B	B	WHO III	Low
CGGA.1008	B	B	WHO IV	Low
CGGA.1018	B	A	WHO II	High
CGGA.1020	B	A	WHO II	High
CGGA.1024	B	B	WHO IV	Low
CGGA.1026	B	B	WHO IV	Low
CGGA.103	B	B	WHO III	Low
CGGA.1036	B	B	WHO IV	Low
CGGA.1039	B	B	WHO IV	Low
CGGA.1045	B	B	WHO IV	Low
CGGA.1055	B	B	WHO III	Low
CGGA.1060	B	B	WHO IV	Low
CGGA.1065	B	A	WHO II	Low
CGGA.1068	B	B	WHO IV	Low
CGGA.107	B	B	WHO III	Low
CGGA.1070	B	B	WHO IV	Low
CGGA.1072	B	B	WHO IV	Low
CGGA.1075	B	B	WHO IV	Low
CGGA.108	B	B	WHO III	Low
CGGA.1091	B	B	WHO IV	Low
CGGA.1094	B	B	WHO III	Low
CGGA.1097	B	B	WHO II	Low
CGGA.1103	B	B	WHO IV	Low
CGGA.1105	B	B	WHO IV	Low
CGGA.1106	B	B	WHO IV	Low
CGGA.1108	B	B	WHO III	Low
CGGA.1113	B	A	WHO III	Low
CGGA.1118	B	A	WHO III	Low
CGGA.1119	B	B	WHO IV	Low
CGGA.112	B	A	WHO II	High
CGGA.1129	B	B	WHO IV	Low
CGGA.1131	B	B	WHO III	Low
CGGA.1134	B	B	WHO IV	Low
CGGA.1135	B	B	WHO IV	Low
CGGA.1138	B	B	WHO IV	Low
CGGA.1142	B	B	WHO IV	Low
CGGA.1146	B	A	WHO III	Low
CGGA.1154	B	B	WHO III	Low
CGGA.1170	B	B	WHO IV	Low
CGGA.1175	B	B	WHO IV	Low
CGGA.1178	B	A	WHO III	Low
CGGA.1180	B	B	WHO IV	Low
CGGA.1183	B	A	WHO III	Low
CGGA.1189	B	A	WHO III	High
CGGA.1190	B	A	WHO III	Low
CGGA.120	B	B	WHO IV	Low
CGGA.1204	B	A	WHO II	High
CGGA.1208	B	B	WHO IV	Low
CGGA.1212	B	A	WHO III	Low
CGGA.1214	B	B	WHO IV	Low
CGGA.1223	B	B	WHO III	Low
CGGA.1237	B	B	WHO IV	Low
CGGA.1251	B	A	WHO IV	Low
CGGA.1258	B	B	WHO IV	Low
CGGA.1269	B	A	WHO III	Low
CGGA.1272	B	B	WHO IV	Low
CGGA.1273	B	A	WHO III	Low
CGGA.1283	B	A	WHO IV	Low
CGGA.1295	B	B	WHO III	Low
CGGA.1299	B	B	WHO IV	Low
CGGA.1313	B	B	WHO IV	Low
CGGA.1314	B	B	WHO IV	Low
CGGA.1320	B	A	WHO IV	Low
CGGA.1321	B	B	WHO III	Low
CGGA.1329	B	B	WHO III	Low
CGGA.1332	B	B	WHO IV	Low
CGGA.1340	B	A	WHO III	Low
CGGA.1342	B	B	WHO IV	Low
CGGA.1343	B	B	WHO IV	Low
CGGA.1346	B	B	WHO IV	Low
CGGA.135	B	B	WHO III	Low
CGGA.1353	B	B	WHO IV	Low
CGGA.1354	B	B	WHO IV	Low
CGGA.1370	B	B	WHO IV	Low
CGGA.1375	B	A	WHO IV	Low
CGGA.1377	B	A	WHO III	Low
CGGA.1380	B	B	WHO IV	Low
CGGA.1381	B	B	WHO IV	Low
CGGA.1382	B	B	WHO IV	Low
CGGA.1387	B	B	WHO IV	Low
CGGA.1393	B	B	WHO IV	Low
CGGA.1402	B	B	WHO IV	Low
CGGA.1403	B	B	WHO IV	Low
CGGA.1410	B	B	WHO IV	Low
CGGA.1413	B	A	WHO III	Low
CGGA.1417	B	A	WHO III	Low
CGGA.1419	B	B	WHO IV	Low
CGGA.1425	B	A	WHO IV	Low
CGGA.1426	B	B	WHO IV	Low
CGGA.1429	B	B	WHO IV	Low
CGGA.1430	B	B	WHO IV	Low
CGGA.1433	B	B	WHO IV	Low
CGGA.1435	B	A	WHO III	Low
CGGA.1444	B	B	WHO IV	Low
CGGA.1457	B	B	WHO IV	Low
CGGA.1458	B	A	WHO III	Low
CGGA.1459	B	B	WHO III	Low
CGGA.1460	B	B	WHO IV	Low
CGGA.1461	B	B	WHO IV	Low
CGGA.1462	B	B	WHO IV	Low
CGGA.1473	B	B	WHO III	Low
CGGA.1475	B	B	WHO IV	Low
CGGA.1478	B	B	WHO IV	Low
CGGA.1488	B	A	WHO II	Low
CGGA.1491	B	B	WHO IV	Low
CGGA.1492	B	B	WHO IV	Low
CGGA.1496	B	B	WHO IV	Low
CGGA.1497	B	B	WHO III	Low
CGGA.1505	B	B	WHO IV	Low
CGGA.1510	B	B	WHO III	Low
CGGA.1521	B	B	WHO IV	Low
CGGA.1526	B	A	WHO III	Low
CGGA.1529	B	A	WHO IV	Low
CGGA.1536	B	A	WHO II	Low
CGGA.1538	B	B	WHO IV	Low
CGGA.1539	B	A	WHO IV	Low
CGGA.1554	B	B	WHO III	Low
CGGA.1558	B	B	WHO IV	Low
CGGA.1560	B	B	WHO IV	Low
CGGA.1564	B	B	WHO IV	Low
CGGA.1575	B	B	WHO III	Low
CGGA.1586	B	B	WHO IV	Low
CGGA.1587	B	B	WHO III	Low
CGGA.1591	B	A	WHO III	Low
CGGA.1592	B	B	WHO III	Low
CGGA.1598	B	A	WHO III	Low
CGGA.1601	B	B	WHO IV	Low
CGGA.1604	B	B	WHO IV	Low
CGGA.1606	B	B	WHO III	Low
CGGA.1612	B	B	WHO IV	Low
CGGA.1613	B	B	WHO IV	Low
CGGA.1624	B	B	WHO IV	Low
CGGA.1645	B	A	WHO III	High
CGGA.1656	B	B	WHO IV	Low
CGGA.1659	B	B	WHO IV	Low
CGGA.1669	B	B	WHO III	Low
CGGA.1671	B	B	WHO III	Low
CGGA.1675	B	B	WHO III	Low
CGGA.1682	B	B	WHO IV	Low
CGGA.1685	B	B	WHO III	Low
CGGA.1687	B	B	WHO IV	Low
CGGA.1690	B	B	WHO IV	Low
CGGA.1694	B	B	WHO IV	Low
CGGA.1698	B	B	WHO IV	Low
CGGA.1702	B	B	WHO IV	Low
CGGA.1708	B	B	WHO IV	Low
CGGA.1709	B	B	WHO IV	Low
CGGA.1713	B	B	WHO IV	Low
CGGA.1715	B	B	WHO II	Low
CGGA.1716	B	B	WHO III	Low
CGGA.1720	B	B	WHO II	Low
CGGA.1725	B	A	WHO III	Low
CGGA.1728	B	B	WHO IV	Low
CGGA.1735	B	B	WHO IV	Low
CGGA.1738	B	A	WHO III	Low
CGGA.1749	B	B	WHO IV	Low
CGGA.1758	B	B	WHO IV	Low
CGGA.1770	B	B	WHO IV	Low
CGGA.1771	B	A	WHO III	Low
CGGA.1773	B	B	WHO IV	Low
CGGA.1785	B	B	WHO IV	Low
CGGA.1807	B	B	WHO IV	Low
CGGA.1812	B	B	WHO IV	Low
CGGA.1814	B	B	WHO IV	Low
CGGA.1815	B	B	WHO IV	Low
CGGA.1819	B	B	WHO IV	Low
CGGA.1820	B	B	WHO IV	Low
CGGA.1826	B	B	WHO IV	Low
CGGA.1833	B	B	WHO IV	Low
CGGA.1862	B	B	WHO III	Low
CGGA.1866	B	B	WHO IV	Low
CGGA.1908	B	B	WHO IV	Low
CGGA.1911	B	B	WHO IV	Low
CGGA.1946	B	B	WHO IV	Low
CGGA.2006	B	B	WHO III	Low
CGGA.2062	B	B	WHO IV	Low
CGGA.2078	B	B	WHO IV	Low
CGGA.236	B	A	WHO II	High
CGGA.247	B	A	WHO III	Low
CGGA.272	B	B	WHO IV	Low
CGGA.274	B	B	WHO IV	Low
CGGA.374	B	A	WHO IV	Low
CGGA.406	B	B	WHO III	Low
CGGA.420	B	A	WHO III	Low
CGGA.457	B	B	WHO III	Low
CGGA.483	B	B	WHO IV	Low
CGGA.487	B	B	WHO IV	Low
CGGA.488	B	B	WHO III	High
CGGA.492	B	B	WHO III	Low
CGGA.499	B	B	WHO IV	Low
CGGA.509	B	B	WHO IV	Low
CGGA.521	B	B	WHO III	Low
CGGA.530	B	B	WHO IV	Low
CGGA.545	B	B	WHO IV	Low
CGGA.604	B	B	WHO IV	Low
CGGA.624	B	B	WHO IV	Low
CGGA.633	B	A	WHO II	High
CGGA.642	B	A	WHO II	High
CGGA.643	B	B	WHO III	Low
CGGA.652	B	A	WHO III	Low
CGGA.655	B	A	WHO II	High
CGGA.658	B	B	WHO IV	Low
CGGA.676	B	B	WHO IV	Low
CGGA.678	B	B	WHO III	Low
CGGA.679	B	B	WHO IV	Low
CGGA.685	B	A	WHO II	High
CGGA.705	B	B	WHO III	Low
CGGA.707	B	A	WHO II	Low
CGGA.719	B	B	WHO IV	Low
CGGA.738	B	A	WHO II	Low
CGGA.747	B	A	WHO IV	Low
CGGA.759	B	A	WHO IV	Low
CGGA.766	B	A	WHO II	High
CGGA.777	B	B	WHO IV	Low
CGGA.782	B	B	WHO IV	Low
CGGA.791	B	B	WHO III	Low
CGGA.809	B	A	WHO II	Low
CGGA.831	B	B	WHO IV	Low
CGGA.834	B	B	WHO II	Low
CGGA.837	B	B	WHO IV	Low
CGGA.848	B	B	WHO IV	Low
CGGA.850	B	B	WHO IV	Low
CGGA.867	B	B	WHO III	Low
CGGA.878	B	B	WHO IV	Low
CGGA.881	B	B	WHO III	Low
CGGA.884	B	A	WHO II	High
CGGA.888	B	B	WHO III	Low
CGGA.890	B	A	WHO III	Low
CGGA.899	B	B	WHO IV	Low
CGGA.901	B	A	WHO III	Low
CGGA.902	B	B	WHO IV	Low
CGGA.903	B	B	WHO III	Low
CGGA.904	B	A	WHO II	Low
CGGA.D02	B	B	WHO IV	Low
CGGA.D11	B	B	WHO III	Low
CGGA.D15	B	A	WHO II	High
CGGA.D19	B	B	WHO II	Low
CGGA.D21	B	B	WHO III	Low
CGGA.D26	B	B	WHO IV	Low
CGGA.D32	B	B	WHO IV	Low
CGGA.D34	B	B	WHO IV	Low
CGGA.D36	B	B	WHO IV	Low
CGGA.D44	B	A	WHO III	Low
CGGA.D45	B	A	WHO III	High
CGGA.D46	B	B	WHO III	Low
CGGA.D50	B	B	WHO II	Low
CGGA.J023	B	B	WHO III	Low
CGGA.J50	B	A	WHO II	Low
CGGA.J73	B	A	WHO III	Low
CGGA.P100	B	B	WHO IV	Low
CGGA.P102	B	B	WHO IV	Low
CGGA.P103	B	A	WHO II	Low
CGGA.P106	B	B	WHO IV	Low
CGGA.P108	B	B	WHO III	Low
CGGA.P109	B	B	WHO IV	Low
CGGA.P110	B	B	WHO III	Low
CGGA.P111	B	A	WHO II	Low
CGGA.P128	B	A	WHO II	Low
CGGA.P13	B	A	WHO II	Low
CGGA.P131	B	A	WHO III	Low
CGGA.P132	B	A	WHO II	Low
CGGA.P137	B	A	WHO II	Low
CGGA.P143	B	B	WHO IV	Low
CGGA.P147	B	B	WHO II	Low
CGGA.P156	B	A	WHO II	Low
CGGA.P157	B	B	WHO III	Low
CGGA.P159	B	B	WHO III	Low
CGGA.P160	B	B	WHO IV	Low
CGGA.P163	B	B	WHO III	Low
CGGA.P17	B	A	WHO III	Low
CGGA.P173	B	B	WHO II	Low
CGGA.P174	B	A	WHO II	Low
CGGA.P176	B	A	WHO II	Low
CGGA.P177	B	B	WHO II	Low
CGGA.P179	B	A	WHO II	Low
CGGA.P18	B	B	WHO III	Low
CGGA.P181	B	B	WHO III	Low
CGGA.P182	B	B	WHO IV	Low
CGGA.P183	B	A	WHO III	Low
CGGA.P185	B	B	WHO III	Low
CGGA.P19	B	A	WHO II	Low
CGGA.P199	B	B	WHO IV	Low
CGGA.P22	B	B	WHO IV	Low
CGGA.P27	B	A	WHO II	Low
CGGA.P28	B	B	WHO IV	Low
CGGA.P283	B	B	WHO IV	Low
CGGA.P30	B	B	WHO II	Low
CGGA.P319	B	B	WHO III	Low
CGGA.P328	B	B	WHO III	Low
CGGA.P399	B	A	WHO II	Low
CGGA.P411	B	B	WHO IV	Low
CGGA.P421	B	B	WHO III	Low
CGGA.P446	B	A	WHO III	Low
CGGA.P483	B	B	WHO III	Low
CGGA.P492	B	A	WHO II	Low
CGGA.P512	B	B	WHO IV	Low
CGGA.P585	B	B	WHO IV	Low
CGGA.P594	B	B	WHO III	Low
CGGA.P604	B	B	WHO III	Low
CGGA.P84	B	B	WHO II	Low
CGGA.P86	B	A	WHO II	Low
CGGA.P89	B	B	WHO IV	Low
CGGA.P93	B	B	WHO II	Low
GSM2899179	B	B	WHO III	Low
GSM2899186	B	A	WHO III	Low
GSM2899200	B	B	WHO II	Low
GSM2899206	B	A	WHO III	Low
GSM2899209	B	A	WHO III	Low
GSM2899211	B	A	WHO III	High
GSM2899213	B	B	WHO III	Low
GSM2899220	B	A	WHO III	Low
GSM2899242	B	A	WHO III	High
GSM2899260	B	B	WHO III	Low
GSM2899274	B	B	WHO III	Low
GSM2899275	B	A	WHO III	Low
GSM2899277	B	B	WHO II	Low
GSM2899280	B	B	WHO III	Low
GSM2899281	B	A	WHO III	Low
GSM2899284	B	A	WHO III	Low
GSM2899287	B	B	WHO III	Low
GSM2899291	B	B	WHO III	Low
GSM2899297	B	B	WHO II	Low
GSM2899307	B	B	WHO III	Low
GSM2899324	B	B	WHO III	Low
GSM2899326	B	B	WHO IV	Low
GSM2899327	B	B	WHO IV	Low
GSM2899331	B	B	WHO IV	Low
GSM2899332	B	B	WHO IV	Low
GSM2899339	B	A	WHO IV	Low
GSM2899342	B	B	WHO IV	Low
GSM2899343	B	B	WHO IV	Low
GSM2899344	B	B	WHO IV	Low
GSM2899345	B	B	WHO IV	Low
GSM2899346	B	B	WHO IV	Low
GSM2899347	B	B	WHO IV	Low
GSM2899349	B	B	WHO IV	Low
GSM2899350	B	B	WHO IV	Low
GSM2899351	B	B	WHO IV	Low
GSM2899352	B	B	WHO IV	Low
GSM2899353	B	B	WHO IV	Low
GSM2899354	B	B	WHO IV	Low
GSM2899355	B	B	WHO IV	Low
GSM2899358	B	B	WHO IV	Low
GSM2899369	B	B	WHO IV	Low
GSM2899371	B	B	WHO IV	Low
GSM2899380	B	B	WHO IV	Low
GSM2899382	B	B	WHO IV	Low
GSM2899384	B	B	WHO IV	Low
GSM2899393	B	A	WHO IV	Low
GSM2899396	B	B	WHO IV	Low
GSM2899397	B	B	WHO IV	Low
GSM2899399	B	B	WHO IV	Low
GSM2899405	B	B	WHO IV	Low
GSM2899406	B	B	WHO IV	Low
GSM2899407	B	B	WHO IV	Low
GSM2899409	B	B	WHO IV	Low
GSM2899417	B	B	WHO IV	Low
GSM2899420	B	B	WHO IV	Low
GSM2899423	B	B	WHO IV	Low
GSM2899425	B	B	WHO IV	Low
GSM2899426	B	B	WHO IV	Low
GSM2899427	B	B	WHO IV	Low
GSM2899428	B	B	WHO IV	Low
GSM2899432	B	B	WHO IV	Low
GSM2899436	B	B	WHO IV	Low
GSM2899446	B	A	WHO IV	Low
GSM2899449	B	B	WHO IV	Low
GSM2899452	B	B	WHO IV	Low
GSM2899454	B	B	WHO IV	Low
GSM2899455	B	B	WHO IV	Low
GSM2899458	B	B	WHO IV	Low
GSM2899461	B	B	WHO IV	Low
GSM2899466	B	B	WHO IV	Low
GSM2899471	B	B	WHO IV	Low
GSM2899472	B	B	WHO IV	Low
GSM2899477	B	A	WHO IV	Low
GSM2899478	B	B	WHO IV	Low
GSM2899483	B	B	WHO IV	Low
GSM2899484	B	B	WHO IV	Low
GSM2899485	B	B	WHO IV	Low
GSM2899486	B	B	WHO IV	Low
GSM2899492	B	B	WHO IV	Low
GSM2899495	B	B	WHO IV	Low
GSM2899497	B	B	WHO IV	Low
GSM2899500	B	B	WHO IV	Low
GSM2899501	B	B	WHO IV	Low
GSM2899502	B	B	WHO IV	Low
GSM2899504	B	A	WHO IV	Low
GSM2899505	B	B	WHO IV	Low
GSM2899506	B	B	WHO IV	Low
GSM2899508	B	B	WHO IV	Low
GSM2899509	B	B	WHO IV	Low
GSM2899511	B	B	WHO IV	Low
GSM2899512	B	B	WHO IV	Low
GSM2899513	B	B	WHO IV	Low
GSM2899514	B	B	WHO IV	Low
GSM2899515	B	B	WHO IV	Low
GSM2899518	B	A	WHO IV	Low
GSM2899520	B	B	WHO IV	Low
GSM2899521	B	B	WHO IV	Low
GSM2899524	B	B	WHO IV	Low
GSM2899525	B	B	WHO IV	Low
GSM2899529	B	B	WHO IV	Low
GSM2899534	B	B	WHO IV	Low
GSM2899535	B	B	WHO IV	Low
GSM2899536	B	B	WHO IV	Low
GSM2899537	B	B	WHO IV	Low
GSM2899541	B	B	WHO IV	Low
GSM2899545	B	B	WHO IV	Low
GSM2899613	B	A	WHO II	High
GSM2899614	B	B	WHO III	Low
GSM2899615	B	B	WHO III	Low
GSM2899616	B	A	WHO II	High
GSM2899625	B	B	WHO III	Low
GSM2899627	B	B	WHO III	Low
GSM2899634	B	B	WHO III	Low
GSM2899646	B	B	WHO III	Low
GSM2899651	B	B	WHO III	Low
GSM2899719	B	B	WHO III	Low
GSM405210	B	A	WHO III	High
GSM405215	B	B	WHO IV	Low
GSM405218	B	B	WHO IV	Low
GSM405220	B	B	WHO IV	Low
GSM405230	B	B	WHO IV	Low
GSM405231	B	B	WHO IV	Low
GSM405232	B	B	WHO IV	Low
GSM405234	B	A	WHO IV	Low
GSM405239	B	B	WHO IV	Low
GSM405242	B	B	WHO IV	Low
GSM405247	B	B	WHO IV	Low
GSM405253	B	B	WHO IV	Low
GSM405254	B	B	WHO IV	Low
GSM405257	B	A	WHO III	High
GSM405260	B	B	WHO IV	Low
GSM405262	B	B	WHO IV	Low
GSM405267	B	A	WHO IV	Low
GSM405279	B	B	WHO III	Low
GSM405284	B	A	WHO III	Low
GSM405285	B	B	WHO III	Low
GSM405286	B	A	WHO III	High
GSM405288	B	A	WHO III	High
GSM405289	B	B	WHO III	Low
GSM405292	B	B	WHO IV	Low
GSM405293	B	B	WHO IV	Low
GSM405299	B	B	WHO IV	Low
GSM405303	B	A	WHO IV	Low
GSM405312	B	A	WHO IV	Low
GSM405316	B	B	WHO III	Low
GSM405326	B	B	WHO IV	Low
GSM405328	B	B	WHO IV	Low
GSM405329	B	A	WHO III	High
GSM405330	B	A	WHO IV	High
GSM405335	B	A	WHO III	High
GSM405337	B	A	WHO IV	Low
GSM405347	B	B	WHO III	Low
GSM405349	B	B	WHO IV	Low
GSM405351	B	B	WHO IV	Low
GSM405352	B	B	WHO IV	Low
GSM405355	B	A	WHO II	Low
GSM405363	B	B	WHO IV	Low
GSM405364	B	B	WHO III	Low
GSM405366	B	A	WHO III	High
GSM405367	B	B	WHO IV	Low
GSM405368	B	A	WHO IV	Low
GSM405372	B	A	WHO IV	Low
GSM405382	B	A	WHO III	High
GSM405383	B	B	WHO II	Low
GSM405387	B	A	WHO III	High
GSM405388	B	B	WHO III	Low
GSM405392	B	B	WHO IV	Low
GSM405393	B	B	WHO IV	Low
GSM405396	B	B	WHO IV	Low
GSM405399	B	B	WHO III	Low
GSM405400	B	A	WHO III	Low
GSM405407	B	B	WHO III	Low
GSM405410	B	A	WHO III	High
GSM405417	B	B	WHO IV	Low
GSM405426	B	B	WHO IV	Low
GSM405431	B	B	WHO IV	Low
GSM405434	B	B	WHO IV	Low
GSM405436	B	A	WHO IV	Low
GSM405438	B	B	WHO IV	Low
GSM405460	B	B	WHO III	Low
GSM405465	B	B	WHO IV	Low
GSM405467	B	A	WHO III	High
GSM405475	B	A	WHO IV	Low
GSM405476	B	B	WHO III	Low
TCGA.02.2483.01A	B	B	WHO IV	Low
TCGA.02.2485.01A	B	B	WHO IV	Low
TCGA.06.0129.01A	B	B	WHO IV	Low
TCGA.06.0130.01A	B	B	WHO IV	Low
TCGA.06.0152.02A	B	B	WHO IV	Low
TCGA.06.0157.01A	B	B	WHO IV	Low
TCGA.06.0158.01A	B	B	WHO IV	Low
TCGA.06.0174.01A	B	B	WHO IV	Low
TCGA.06.0221.02A	B	B	WHO IV	Low
TCGA.06.0686.01A	B	B	WHO IV	Low
TCGA.06.0747.01A	B	B	WHO IV	Low
TCGA.06.1804.01A	B	B	WHO IV	Low
TCGA.06.2557.01A	B	B	WHO IV	Low
TCGA.06.2558.01A	B	B	WHO IV	Low
TCGA.06.2559.01A	B	B	WHO IV	Low
TCGA.06.2563.01A	B	B	WHO IV	Low
TCGA.06.2564.01A	B	B	WHO IV	Low
TCGA.06.2565.01A	B	B	WHO IV	Low
TCGA.06.2567.01A	B	B	WHO IV	Low
TCGA.06.2569.01A	B	B	WHO IV	Low
TCGA.06.2570.01A	B	B	WHO IV	Low
TCGA.06.5408.01A	B	B	WHO IV	Low
TCGA.06.5413.01A	B	B	WHO IV	Low
TCGA.06.5414.01A	B	B	WHO IV	Low
TCGA.06.5416.01A	B	B	WHO IV	Low
TCGA.06.5417.01A	B	B	WHO IV	Low
TCGA.06.5856.01A	B	B	WHO IV	Low
TCGA.06.5858.01A	B	B	WHO IV	Low
TCGA.06.5859.01A	B	B	WHO IV	Low
TCGA.08.0386.01A	B	B	WHO IV	Low
TCGA.12.0618.01A	B	B	WHO IV	Low
TCGA.12.0619.01A	B	B	WHO IV	Low
TCGA.12.0821.01A	B	B	WHO IV	Low
TCGA.12.1597.01B	B	B	WHO IV	Low
TCGA.12.3650.01A	B	B	WHO IV	Low
TCGA.12.3653.01A	B	B	WHO IV	Low
TCGA.12.5299.01A	B	B	WHO IV	Low
TCGA.14.0787.01A	B	B	WHO IV	Low
TCGA.14.0790.01B	B	B	WHO IV	Low
TCGA.14.0871.01A	B	B	WHO IV	Low
TCGA.14.1825.01A	B	B	WHO IV	Low
TCGA.15.0742.01A	B	B	WHO IV	Low
TCGA.19.1390.01A	B	B	WHO IV	Low
TCGA.19.1787.01B	B	B	WHO IV	Low
TCGA.19.2619.01A	B	B	WHO IV	Low
TCGA.19.2624.01A	B	B	WHO IV	Low
TCGA.19.2629.01A	B	B	WHO IV	Low
TCGA.19.5960.01A	B	B	WHO IV	Low
TCGA.26.5132.01A	B	B	WHO IV	Low
TCGA.26.5133.01A	B	B	WHO IV	Low
TCGA.26.5134.01A	B	B	WHO IV	Low
TCGA.26.5135.01A	B	B	WHO IV	Low
TCGA.26.5139.01A	B	B	WHO IV	Low
TCGA.27.1830.01A	B	B	WHO IV	Low
TCGA.27.2521.01A	B	B	WHO IV	Low
TCGA.27.2523.01A	B	B	WHO IV	Low
TCGA.27.2528.01A	B	B	WHO IV	Low
TCGA.28.1747.01C	B	B	WHO IV	Low
TCGA.28.1753.01A	B	B	WHO IV	Low
TCGA.28.2509.01A	B	B	WHO IV	Low
TCGA.28.2514.01A	B	B	WHO IV	Low
TCGA.28.5204.01A	B	B	WHO IV	Low
TCGA.28.5207.01A	B	B	WHO IV	Low
TCGA.28.5208.01A	B	B	WHO IV	Low
TCGA.28.5209.01A	B	B	WHO IV	Low
TCGA.28.5215.01A	B	B	WHO IV	Low
TCGA.28.5218.01A	B	B	WHO IV	Low
TCGA.32.1970.01A	B	B	WHO IV	Low
TCGA.32.2616.01A	B	B	WHO IV	Low
TCGA.32.2632.01A	B	B	WHO IV	Low
TCGA.32.2634.01A	B	B	WHO IV	Low
TCGA.32.2638.01A	B	B	WHO IV	Low
TCGA.41.3915.01A	B	B	WHO IV	Low
TCGA.41.5651.01A	B	B	WHO IV	Low
TCGA.76.4925.01A	B	B	WHO IV	Low
TCGA.76.4927.01A	B	B	WHO IV	Low
TCGA.76.4931.01A	B	B	WHO IV	Low
TCGA.76.4932.01A	B	B	WHO IV	Low
TCGA.CS.4943.01A	B	B	WHO III	Low
TCGA.CS.5395.01A	B	B	WHO II	Low
TCGA.CS.6186.01A	B	B	WHO III	Low
TCGA.CS.6188.01A	B	B	WHO III	Low
TCGA.CS.6668.01A	B	A	WHO II	High
TCGA.DB.5280.01A	B	A	WHO II	Low
TCGA.DB.A4XB.01A	B	B	WHO III	Low
TCGA.DB.A4XC.01A	B	A	WHO II	Low
TCGA.DB.A4XD.01A	B	A	WHO III	High
TCGA.DB.A4XE.01A	B	A	WHO III	Low
TCGA.DB.A64Q.01A	B	A	WHO II	Low
TCGA.DB.A64R.01A	B	A	WHO II	High
TCGA.DB.A64W.01A	B	A	WHO III	High
TCGA.DB.A75K.01A	B	A	WHO III	High
TCGA.DH.5140.01A	B	B	WHO III	Low
TCGA.DH.A7UU.01A	B	A	WHO III	High
TCGA.DU.5847.01A	B	B	WHO III	Low
TCGA.DU.5852.01A	B	B	WHO III	Low
TCGA.DU.5874.01A	B	A	WHO II	High
TCGA.DU.6392.01A	B	B	WHO III	Low
TCGA.DU.6393.01A	B	A	WHO III	High
TCGA.DU.6394.01A	B	A	WHO III	Low
TCGA.DU.6396.01A	B	B	WHO III	Low
TCGA.DU.6400.01A	B	A	WHO II	High
TCGA.DU.6402.01A	B	B	WHO III	Low
TCGA.DU.6403.01A	B	B	WHO III	Low
TCGA.DU.6405.01A	B	B	WHO III	Low
TCGA.DU.6406.01A	B	B	WHO III	Low
TCGA.DU.6410.01A	B	A	WHO III	High
TCGA.DU.6542.01A	B	B	WHO III	Low
TCGA.DU.7006.01A	B	B	WHO III	Low
TCGA.DU.7010.01A	B	B	WHO III	Low
TCGA.DU.7013.01A	B	B	WHO III	Low
TCGA.DU.7294.01A	B	A	WHO II	High
TCGA.DU.7298.01A	B	B	WHO III	Low
TCGA.DU.7299.01A	B	A	WHO III	High
TCGA.DU.7302.01A	B	A	WHO III	Low
TCGA.DU.8164.01A	B	A	WHO II	High
TCGA.DU.8165.01A	B	B	WHO III	Low
TCGA.DU.8166.01A	B	A	WHO II	Low
TCGA.DU.8168.01A	B	A	WHO III	Low
TCGA.DU.A5TP.01A	B	B	WHO III	Low
TCGA.DU.A76L.01A	B	B	WHO III	Low
TCGA.DU.A7TA.01A	B	A	WHO II	Low
TCGA.DU.A7TD.01A	B	B	WHO III	Low
TCGA.DU.A7TJ.01A	B	B	WHO III	Low
TCGA.E1.5304.01A	B	B	WHO III	Low
TCGA.E1.5311.01A	B	A	WHO III	High
TCGA.E1.5318.01A	B	A	WHO II	High
TCGA.E1.5322.01A	B	A	WHO II	Low
TCGA.E1.A7YD.01A	B	B	WHO III	Low
TCGA.E1.A7YE.01A	B	B	WHO III	Low
TCGA.E1.A7YI.01A	B	B	WHO III	Low
TCGA.E1.A7YJ.01A	B	B	WHO III	Low
TCGA.E1.A7YL.01A	B	B	WHO III	Low
TCGA.E1.A7YQ.01A	B	B	WHO III	Low
TCGA.E1.A7YS.01A	B	A	WHO III	High
TCGA.E1.A7YV.01A	B	B	WHO III	Low
TCGA.E1.A7YW.01A	B	A	WHO II	Low
TCGA.EZ.7264.01A	B	A	WHO II	High
TCGA.FG.6691.01A	B	A	WHO II	Low
TCGA.FG.7634.01A	B	B	WHO II	Low
TCGA.FG.8182.01A	B	A	WHO II	Low
TCGA.FG.A4MU.01B	B	B	WHO III	Low
TCGA.FG.A4MW.01A	B	A	WHO III	Low
TCGA.FG.A60K.01A	B	A	WHO II	High
TCGA.FG.A87N.01A	B	B	WHO III	Low
TCGA.FN.7833.01A	B	A	WHO III	Low
TCGA.HT.7468.01A	B	A	WHO III	Low
TCGA.HT.7469.01A	B	B	WHO III	Low
TCGA.HT.7471.01A	B	B	WHO III	Low
TCGA.HT.7477.01B	B	B	WHO III	Low
TCGA.HT.7480.01A	B	A	WHO II	High
TCGA.HT.7604.01A	B	A	WHO II	Low
TCGA.HT.7606.01A	B	B	WHO II	Low
TCGA.HT.7677.01A	B	A	WHO III	Low
TCGA.HT.7687.01A	B	A	WHO III	High
TCGA.HT.7690.01A	B	B	WHO III	Low
TCGA.HT.7858.01A	B	A	WHO II	Low
TCGA.HT.7860.01A	B	B	WHO III	Low
TCGA.HT.7873.01B	B	A	WHO II	Low
TCGA.HT.7879.01A	B	A	WHO III	Low
TCGA.HT.8011.01A	B	B	WHO III	Low
TCGA.HT.8012.01A	B	A	WHO II	High
TCGA.HT.8013.01A	B	A	WHO II	Low
TCGA.HT.8104.01A	B	B	WHO III	Low
TCGA.HT.A5RA.01A	B	B	WHO III	Low
TCGA.HT.A5RC.01A	B	B	WHO III	Low
TCGA.HT.A619.01A	B	A	WHO III	High
TCGA.HT.A61C.01A	B	B	WHO III	Low
TCGA.HW.7491.01A	B	A	WHO II	High
TCGA.HW.8319.01A	B	A	WHO III	Low
TCGA.HW.8322.01A	B	A	WHO II	High
TCGA.KT.A7W1.01A	B	B	WHO III	Low
TCGA.P5.A5EU.01A	B	B	WHO III	Low
TCGA.QH.A6CV.01A	B	B	WHO III	Low
TCGA.QH.A86X.01A	B	A	WHO II	High
TCGA.R8.A6ML.01A	B	A	WHO III	High
TCGA.R8.A6MO.01A	B	A	WHO II	High
TCGA.RY.A83X.01A	B	A	WHO II	High
TCGA.S9.A6TZ.01A	B	A	WHO II	Low
TCGA.S9.A6U0.01A	B	B	WHO III	Low
TCGA.S9.A6U1.01A	B	A	WHO III	Low
TCGA.S9.A6U6.01A	B	A	WHO III	High
TCGA.S9.A6UA.01A	B	B	WHO III	Low
TCGA.S9.A6UB.01A	B	A	WHO II	High
TCGA.S9.A6WH.01A	B	A	WHO II	High
TCGA.S9.A6WM.01A	B	B	WHO III	Low
TCGA.S9.A6WO.01A	B	A	WHO II	High
TCGA.S9.A7IS.01A	B	B	WHO III	Low
TCGA.S9.A7J0.01A	B	B	WHO III	Low
TCGA.S9.A7J3.01A	B	A	WHO III	High
TCGA.S9.A7R8.01A	B	A	WHO III	High
TCGA.S9.A89Z.01A	B	B	WHO III	Low
TCGA.TM.A7C3.01A	B	B	WHO III	Low
TCGA.TM.A84B.01A	B	B	WHO III	Low
TCGA.TM.A84G.01A	B	A	WHO III	High
TCGA.TM.A84H.01A	B	A	WHO III	High
TCGA.TM.A84I.01A	B	B	WHO III	Low
TCGA.TM.A84J.01A	B	B	WHO III	Low
TCGA.TM.A84M.01A	B	A	WHO III	High
TCGA.TM.A84Q.01A	B	A	WHO II	Low
TCGA.TQ.A7RM.01A	B	B	WHO III	Low
TCGA.TQ.A7RO.01A	B	A	WHO II	High
TCGA.TQ.A7RQ.01A	B	A	WHO II	High
TCGA.VV.A86M.01A	B	A	WHO III	High
CGGA.1001	C	C	WHO IV	Low
CGGA.1004	C	C	WHO II	High
CGGA.1019	C	C	WHO IV	Low
CGGA.1023	C	C	WHO IV	High
CGGA.1027	C	A	WHO III	High
CGGA.1033	C	C	WHO II	High
CGGA.1037	C	C	WHO II	High
CGGA.1046	C	C	WHO II	High
CGGA.1051	C	C	WHO II	High
CGGA.1057	C	C	WHO II	Low
CGGA.106	C	A	WHO II	Low
CGGA.1073	C	B	WHO IV	Low
CGGA.1077	C	C	WHO IV	Low
CGGA.1078	C	C	WHO IV	High
CGGA.1079	C	A	WHO III	Low
CGGA.1081	C	A	WHO III	High
CGGA.1116	C	A	WHO IV	High
CGGA.1121	C	C	WHO III	High
CGGA.1126	C	A	WHO III	High
CGGA.1127	C	C	WHO II	High
CGGA.1130	C	C	WHO IV	High
CGGA.1132	C	C	WHO III	High
CGGA.1139	C	C	WHO IV	High
CGGA.1140	C	C	WHO III	High
CGGA.1141	C	C	WHO III	High
CGGA.1144	C	C	WHO III	High
CGGA.1148	C	A	WHO II	High
CGGA.1152	C	C	WHO II	High
CGGA.1155	C	C	WHO III	High
CGGA.1157	C	C	WHO II	High
CGGA.1159	C	C	WHO II	High
CGGA.1161	C	C	WHO III	High
CGGA.1162	C	C	WHO III	High
CGGA.1169	C	A	WHO III	High
CGGA.1171	C	B	WHO IV	Low
CGGA.1177	C	B	WHO IV	Low
CGGA.1181	C	C	WHO II	High
CGGA.1184	C	A	WHO III	High
CGGA.1188	C	C	WHO IV	High
CGGA.1195	C	C	WHO III	High
CGGA.1207	C	C	WHO III	High
CGGA.1216	C	A	WHO IV	Low
CGGA.1224	C	C	WHO IV	Low
CGGA.1228	C	A	WHO II	High
CGGA.1231	C	C	WHO III	High
CGGA.1256	C	C	WHO IV	High
CGGA.1260	C	C	WHO IV	High
CGGA.1263	C	C	WHO III	High
CGGA.1270	C	C	WHO IV	High
CGGA.1281	C	C	WHO III	High
CGGA.1285	C	C	WHO IV	Low
CGGA.1286	C	C	WHO II	High
CGGA.1291	C	C	WHO III	High
CGGA.1301	C	A	WHO IV	Low
CGGA.1305	C	C	WHO III	High
CGGA.1309	C	C	WHO III	High
CGGA.1311	C	A	WHO III	High
CGGA.1319	C	C	WHO III	High
CGGA.1330	C	A	WHO II	Low
CGGA.1335	C	C	WHO II	High
CGGA.1337	C	C	WHO IV	High
CGGA.1345	C	C	WHO II	High
CGGA.1356	C	A	WHO III	High
CGGA.1369	C	C	WHO III	High
CGGA.1371	C	C	WHO IV	Low
CGGA.1383	C	C	WHO III	High
CGGA.1386	C	C	WHO III	High
CGGA.1389	C	C	WHO III	High
CGGA.1390	C	C	WHO III	High
CGGA.1392	C	C	WHO IV	High
CGGA.1400	C	C	WHO III	High
CGGA.1404	C	A	WHO III	High
CGGA.1407	C	C	WHO III	High
CGGA.1411	C	A	WHO III	Low
CGGA.1416	C	C	WHO III	High
CGGA.1420	C	C	WHO IV	High
CGGA.1421	C	C	WHO III	High
CGGA.1427	C	C	WHO II	High
CGGA.1431	C	C	WHO III	High
CGGA.1437	C	C	WHO III	High
CGGA.1441	C	C	WHO IV	Low
CGGA.1443	C	A	WHO II	Low
CGGA.1454	C	C	WHO II	High
CGGA.1472	C	C	WHO IV	High
CGGA.1477	C	C	WHO II	High
CGGA.1482	C	C	WHO III	High
CGGA.1500	C	A	WHO IV	Low
CGGA.1501	C	C	WHO IV	High
CGGA.1502	C	C	WHO II	High
CGGA.1504	C	C	WHO III	High
CGGA.1508	C	C	WHO III	High
CGGA.1513	C	C	WHO III	High
CGGA.1520	C	C	WHO IV	High
CGGA.1525	C	C	WHO III	High
CGGA.1528	C	C	WHO II	High
CGGA.1530	C	C	WHO III	High
CGGA.1533	C	C	WHO III	Low
CGGA.1534	C	C	WHO IV	High
CGGA.1535	C	C	WHO IV	Low
CGGA.1543	C	C	WHO IV	High
CGGA.1546	C	C	WHO IV	Low
CGGA.1551	C	C	WHO IV	High
CGGA.1557	C	C	WHO III	High
CGGA.1565	C	C	WHO III	High
CGGA.1566	C	C	WHO III	High
CGGA.1567	C	C	WHO III	High
CGGA.1568	C	C	WHO III	High
CGGA.1569	C	C	WHO III	High
CGGA.157	C	C	WHO II	High
CGGA.1571	C	C	WHO IV	High
CGGA.1572	C	C	WHO IV	High
CGGA.1579	C	C	WHO II	High
CGGA.1583	C	C	WHO II	High
CGGA.1588	C	C	WHO III	High
CGGA.1594	C	C	WHO II	High
CGGA.1595	C	C	WHO IV	High
CGGA.1603	C	B	WHO IV	Low
CGGA.1605	C	C	WHO IV	High
CGGA.1610	C	C	WHO III	High
CGGA.1614	C	C	WHO III	High
CGGA.1615	C	C	WHO IV	High
CGGA.1617	C	C	WHO II	High
CGGA.1618	C	C	WHO III	High
CGGA.1620	C	C	WHO III	High
CGGA.1621	C	A	WHO II	High
CGGA.1627	C	A	WHO III	High
CGGA.1630	C	C	WHO II	High
CGGA.1640	C	C	WHO III	High
CGGA.1641	C	A	WHO IV	High
CGGA.1642	C	C	WHO II	High
CGGA.1647	C	C	WHO II	High
CGGA.1648	C	C	WHO III	High
CGGA.1649	C	C	WHO II	High
CGGA.165	C	C	WHO II	High
CGGA.1651	C	C	WHO II	High
CGGA.1653	C	C	WHO II	High
CGGA.1655	C	C	WHO II	High
CGGA.1657	C	C	WHO III	High
CGGA.1658	C	A	WHO IV	Low
CGGA.1661	C	C	WHO III	High
CGGA.1662	C	C	WHO II	High
CGGA.1663	C	C	WHO IV	Low
CGGA.1664	C	C	WHO II	High
CGGA.1679	C	C	WHO III	High
CGGA.1681	C	C	WHO IV	High
CGGA.1686	C	C	WHO III	High
CGGA.1693	C	C	WHO III	High
CGGA.1695	C	C	WHO III	High
CGGA.1700	C	C	WHO III	High
CGGA.1701	C	C	WHO III	High
CGGA.1703	C	C	WHO II	High
CGGA.1704	C	C	WHO II	High
CGGA.1706	C	B	WHO IV	Low
CGGA.1714	C	C	WHO III	High
CGGA.1721	C	C	WHO III	High
CGGA.1727	C	C	WHO IV	High
CGGA.1729	C	C	WHO IV	High
CGGA.1731	C	C	WHO III	High
CGGA.1737	C	C	WHO III	High
CGGA.1743	C	C	WHO III	High
CGGA.1744	C	C	WHO IV	High
CGGA.1747	C	C	WHO III	High
CGGA.1760	C	C	WHO II	High
CGGA.1811	C	A	WHO IV	Low
CGGA.1817	C	A	WHO IV	Low
CGGA.1829	C	C	WHO II	High
CGGA.1854	C	C	WHO III	High
CGGA.1857	C	A	WHO IV	Low
CGGA.1863	C	C	WHO III	High
CGGA.1875	C	C	WHO II	High
CGGA.1880	C	C	WHO III	High
CGGA.1882	C	C	WHO III	High
CGGA.1899	C	C	WHO IV	High
CGGA.1901	C	B	WHO IV	Low
CGGA.1902	C	C	WHO II	High
CGGA.1903	C	C	WHO III	High
CGGA.1906	C	C	WHO III	High
CGGA.1912	C	C	WHO IV	High
CGGA.1953	C	B	WHO IV	Low
CGGA.1955	C	C	WHO IV	High
CGGA.1994	C	C	WHO III	High
CGGA.2003	C	C	WHO IV	High
CGGA.2008	C	A	WHO IV	Low
CGGA.2013	C	C	WHO II	High
CGGA.2024	C	C	WHO IV	High
CGGA.2039	C	C	WHO IV	High
CGGA.2053	C	C	WHO IV	High
CGGA.2106	C	C	WHO IV	High
CGGA.235	C	C	WHO II	High
CGGA.241	C	C	WHO II	High
CGGA.256	C	A	WHO II	High
CGGA.261	C	C	WHO II	High
CGGA.269	C	A	WHO II	Low
CGGA.277	C	C	WHO III	High
CGGA.28	C	C	WHO II	High
CGGA.283	C	C	WHO II	High
CGGA.323	C	C	WHO II	High
CGGA.342	C	A	WHO IV	Low
CGGA.358	C	C	WHO III	High
CGGA.369	C	C	WHO II	High
CGGA.400	C	A	WHO III	High
CGGA.494	C	C	WHO IV	High
CGGA.525	C	C	WHO IV	Low
CGGA.541	C	C	WHO II	High
CGGA.543	C	C	WHO II	High
CGGA.554	C	C	WHO III	High
CGGA.565	C	C	WHO III	High
CGGA.568	C	C	WHO IV	High
CGGA.625	C	C	WHO III	High
CGGA.659	C	C	WHO II	High
CGGA.669	C	C	WHO IV	High
CGGA.694	C	C	WHO II	High
CGGA.710	C	A	WHO IV	Low
CGGA.715	C	C	WHO II	High
CGGA.724	C	C	WHO II	High
CGGA.760	C	C	WHO II	High
CGGA.773	C	C	WHO IV	High
CGGA.785	C	C	WHO II	High
CGGA.789	C	C	WHO IV	Low
CGGA.807	C	C	WHO II	High
CGGA.812	C	C	WHO II	High
CGGA.835	C	C	WHO II	High
CGGA.846	C	C	WHO II	High
CGGA.856	C	C	WHO II	High
CGGA.869	C	B	WHO IV	Low
CGGA.898	C	C	WHO II	High
CGGA.D04	C	C	WHO II	High
CGGA.D07	C	C	WHO II	High
CGGA.D09	C	C	WHO IV	High
CGGA.D20	C	C	WHO II	High
CGGA.D29	C	C	WHO II	High
CGGA.D30	C	C	WHO IV	High
CGGA.D35	C	B	WHO IV	Low
CGGA.D40	C	C	WHO II	High
CGGA.D52	C	C	WHO III	High
CGGA.D57	C	A	WHO IV	Low
CGGA.D58	C	C	WHO III	High
CGGA.J130	C	C	WHO II	High
CGGA.P121	C	C	WHO II	High
CGGA.P15	C	C	WHO IV	High
CGGA.P151	C	C	WHO II	High
CGGA.P21	C	C	WHO II	High
CGGA.P269	C	C	WHO III	High
CGGA.P279	C	C	WHO III	High
CGGA.P280	C	C	WHO IV	High
CGGA.P308	C	C	WHO III	High
CGGA.P31	C	C	WHO II	High
CGGA.P310	C	C	WHO III	High
CGGA.P311	C	A	WHO II	Low
CGGA.P314	C	C	WHO III	High
CGGA.P315	C	C	WHO II	High
CGGA.P316	C	C	WHO II	High
CGGA.P326	C	C	WHO III	High
CGGA.P335	C	C	WHO IV	High
CGGA.P346	C	A	WHO II	Low
CGGA.P356	C	C	WHO II	High
CGGA.P358	C	A	WHO II	Low
CGGA.P385	C	A	WHO IV	Low
CGGA.P415	C	A	WHO IV	Low
CGGA.P596	C	C	WHO IV	High
CGGA.P609	C	A	WHO IV	High
CGGA.P610	C	C	WHO IV	High
CGGA.P87	C	C	WHO IV	High
CGGA.P98	C	C	WHO III	High
CGGA.P99	C	A	WHO IV	High
GSM2899180	C	C	WHO II	High
GSM2899184	C	C	WHO II	High
GSM2899194	C	C	WHO II	High
GSM2899198	C	C	WHO II	High
GSM2899244	C	C	WHO II	High
GSM2899262	C	C	WHO II	High
GSM2899273	C	C	WHO II	Low
GSM2899279	C	C	WHO III	High
GSM2899288	C	C	WHO II	High
GSM2899328	C	C	WHO IV	High
GSM2899356	C	A	WHO IV	High
GSM2899365	C	C	WHO IV	High
GSM2899367	C	C	WHO IV	Low
GSM2899370	C	C	WHO IV	High
GSM2899377	C	A	WHO IV	Low
GSM2899389	C	C	WHO IV	High
GSM2899400	C	A	WHO IV	Low
GSM2899403	C	A	WHO IV	High
GSM2899410	C	A	WHO IV	Low
GSM2899413	C	C	WHO IV	High
GSM2899421	C	C	WHO IV	High
GSM2899429	C	B	WHO IV	Low
GSM2899430	C	A	WHO IV	Low
GSM2899434	C	A	WHO IV	Low
GSM2899435	C	B	WHO IV	Low
GSM2899438	C	C	WHO IV	High
GSM2899440	C	B	WHO IV	Low
GSM2899441	C	C	WHO IV	High
GSM2899443	C	C	WHO IV	High
GSM2899444	C	C	WHO IV	High
GSM2899445	C	C	WHO IV	High
GSM2899450	C	C	WHO IV	High
GSM2899451	C	C	WHO IV	High
GSM2899460	C	B	WHO IV	Low
GSM2899467	C	A	WHO IV	Low
GSM2899470	C	A	WHO IV	Low
GSM2899475	C	C	WHO IV	High
GSM2899493	C	C	WHO IV	High
GSM2899496	C	B	WHO IV	Low
GSM2899507	C	C	WHO IV	High
GSM2899516	C	B	WHO IV	Low
GSM2899526	C	C	WHO IV	High
GSM2899527	C	C	WHO IV	High
GSM2899538	C	C	WHO IV	High
GSM2899546	C	C	WHO IV	High
GSM2899612	C	A	WHO II	High
GSM2899628	C	C	WHO II	High
GSM2899633	C	C	WHO II	High
GSM2899643	C	C	WHO II	High
GSM2899649	C	C	WHO III	High
GSM405201	C	A	WHO III	High
GSM405214	C	B	WHO IV	Low
GSM405216	C	C	WHO IV	High
GSM405250	C	A	WHO II	High
GSM405256	C	C	WHO II	High
[truncated: 194 more rows]
