# Supplementary material for: DNA methylation regulator-mediated modification patterns and tumor microenvironment characterization in glioma
Source: Aging (Albany NY). 2022 Sep 21;14(19):7824–50. doi: 10.18632/aging.204291 (PMC9596205; doi:10.18632/aging.204291)
Supplement: Supplementary Table 5 [file aging-14-204291-s006.xlsx]

## Sheet: Supplementary Table 5
Supplementary Table 5. The gene sets used in this work for marking each TME infiltration cell type.
Metagene	Cell.type	Immunity
ADAM28	Activated.B.cell	Adaptive
CD180	Activated.B.cell	Adaptive
CD79B	Activated.B.cell	Adaptive
BLK	Activated.B.cell	Adaptive
CD19	Activated.B.cell	Adaptive
MS4A1	Activated.B.cell	Adaptive
TNFRSF17	Activated.B.cell	Adaptive
IGHM	Activated.B.cell	Adaptive
GNG7	Activated.B.cell	Adaptive
MICAL3	Activated.B.cell	Adaptive
SPIB	Activated.B.cell	Adaptive
HLA-DOB	Activated.B.cell	Adaptive
IGKC	Activated.B.cell	Adaptive
PNOC	Activated.B.cell	Adaptive
FCRL2	Activated.B.cell	Adaptive
BACH2	Activated.B.cell	Adaptive
CR2	Activated.B.cell	Adaptive
TCL1A	Activated.B.cell	Adaptive
AKNA	Activated.B.cell	Adaptive
ARHGAP25	Activated.B.cell	Adaptive
CCL21	Activated.B.cell	Adaptive
CD27	Activated.B.cell	Adaptive
CD38	Activated.B.cell	Adaptive
CLEC17A	Activated.B.cell	Adaptive
CLEC9A	Activated.B.cell	Adaptive
CLECL1	Activated.B.cell	Adaptive
AIM2	Activated.CD4.T.cell	Adaptive
BIRC3	Activated.CD4.T.cell	Adaptive
BRIP1	Activated.CD4.T.cell	Adaptive
CCL20	Activated.CD4.T.cell	Adaptive
CCL4	Activated.CD4.T.cell	Adaptive
CCL5	Activated.CD4.T.cell	Adaptive
CCNB1	Activated.CD4.T.cell	Adaptive
CCR7	Activated.CD4.T.cell	Adaptive
DUSP2	Activated.CD4.T.cell	Adaptive
ESCO2	Activated.CD4.T.cell	Adaptive
ETS1	Activated.CD4.T.cell	Adaptive
EXO1	Activated.CD4.T.cell	Adaptive
EXOC6	Activated.CD4.T.cell	Adaptive
IARS	Activated.CD4.T.cell	Adaptive
ITK	Activated.CD4.T.cell	Adaptive
KIF11	Activated.CD4.T.cell	Adaptive
KNTC1	Activated.CD4.T.cell	Adaptive
NUF2	Activated.CD4.T.cell	Adaptive
PRC1	Activated.CD4.T.cell	Adaptive
PSAT1	Activated.CD4.T.cell	Adaptive
RGS1	Activated.CD4.T.cell	Adaptive
RTKN2	Activated.CD4.T.cell	Adaptive
SAMSN1	Activated.CD4.T.cell	Adaptive
SELL	Activated.CD4.T.cell	Adaptive
TRAT1	Activated.CD4.T.cell	Adaptive
ADRM1	Activated.CD8.T.cell	Adaptive
AHSA1	Activated.CD8.T.cell	Adaptive
C1GALT1C1	Activated.CD8.T.cell	Adaptive
CCT6B	Activated.CD8.T.cell	Adaptive
CD37	Activated.CD8.T.cell	Adaptive
CD3D	Activated.CD8.T.cell	Adaptive
CD3E	Activated.CD8.T.cell	Adaptive
CD3G	Activated.CD8.T.cell	Adaptive
CD69	Activated.CD8.T.cell	Adaptive
CD8A	Activated.CD8.T.cell	Adaptive
CETN3	Activated.CD8.T.cell	Adaptive
CSE1L	Activated.CD8.T.cell	Adaptive
GEMIN6	Activated.CD8.T.cell	Adaptive
GNLY	Activated.CD8.T.cell	Adaptive
GPT2	Activated.CD8.T.cell	Adaptive
GZMA	Activated.CD8.T.cell	Adaptive
GZMH	Activated.CD8.T.cell	Adaptive
GZMK	Activated.CD8.T.cell	Adaptive
IL2RB	Activated.CD8.T.cell	Adaptive
LCK	Activated.CD8.T.cell	Adaptive
MPZL1	Activated.CD8.T.cell	Adaptive
NKG7	Activated.CD8.T.cell	Adaptive
PIK3IP1	Activated.CD8.T.cell	Adaptive
PTRH2	Activated.CD8.T.cell	Adaptive
TIMM13	Activated.CD8.T.cell	Adaptive
ZAP70	Activated.CD8.T.cell	Adaptive
ACP5	Gamma.delta.T.cell	Adaptive
AQP9	Gamma.delta.T.cell	Adaptive
BTN3A2	Gamma.delta.T.cell	Adaptive
C1orf54	Gamma.delta.T.cell	Adaptive
CARD8	Gamma.delta.T.cell	Adaptive
CCL18	Gamma.delta.T.cell	Adaptive
CD209	Gamma.delta.T.cell	Adaptive
CD33	Gamma.delta.T.cell	Adaptive
CD36	Gamma.delta.T.cell	Adaptive
CDK5	Gamma.delta.T.cell	Adaptive
IL10RB	Gamma.delta.T.cell	Adaptive
KLRF1	Gamma.delta.T.cell	Adaptive
LGALS1	Gamma.delta.T.cell	Adaptive
MAPK7	Gamma.delta.T.cell	Adaptive
KLHL7	Gamma.delta.T.cell	Adaptive
KRT80	Gamma.delta.T.cell	Adaptive
LAMC1	Gamma.delta.T.cell	Adaptive
LCORL	Gamma.delta.T.cell	Adaptive
LMNB1	Gamma.delta.T.cell	Adaptive
MEIS3P1	Gamma.delta.T.cell	Adaptive
MPL	Gamma.delta.T.cell	Adaptive
FABP1	Gamma.delta.T.cell	Adaptive
FABP5	Gamma.delta.T.cell	Adaptive
FADD	Gamma.delta.T.cell	Adaptive
MFAP3L	Gamma.delta.T.cell	Adaptive
MINPP1	Gamma.delta.T.cell	Adaptive
RPS24	Gamma.delta.T.cell	Adaptive
RPS7	Gamma.delta.T.cell	Adaptive
RPS9	Gamma.delta.T.cell	Adaptive
DBNL	Gamma.delta.T.cell	Adaptive
CCL13	Gamma.delta.T.cell	Adaptive
CD22	Immature..B.cell	Adaptive
CYBB	Immature..B.cell	Adaptive
FAM129C	Immature..B.cell	Adaptive
FCRL1	Immature..B.cell	Adaptive
FCRL3	Immature..B.cell	Adaptive
FCRL5	Immature..B.cell	Adaptive
FCRLA	Immature..B.cell	Adaptive
HDAC9	Immature..B.cell	Adaptive
HLA-DQA1	Immature..B.cell	Adaptive
HVCN1	Immature..B.cell	Adaptive
KIAA0226	Immature..B.cell	Adaptive
NCF1	Immature..B.cell	Adaptive
NCF1B	Immature..B.cell	Adaptive
P2RY10	Immature..B.cell	Adaptive
SP100	Immature..B.cell	Adaptive
TXNIP	Immature..B.cell	Adaptive
STAP1	Immature..B.cell	Adaptive
TAGAP	Immature..B.cell	Adaptive
ZCCHC2	Immature..B.cell	Adaptive
CCL3L1	Regulatory.T.cell	Adaptive
CD72	Regulatory.T.cell	Adaptive
CLEC5A	Regulatory.T.cell	Adaptive
FOXP3	Regulatory.T.cell	Adaptive
ITGA4	Regulatory.T.cell	Adaptive
L1CAM	Regulatory.T.cell	Adaptive
LIPA	Regulatory.T.cell	Adaptive
LRP1	Regulatory.T.cell	Adaptive
LRRC42	Regulatory.T.cell	Adaptive
MARCO	Regulatory.T.cell	Adaptive
MMP12	Regulatory.T.cell	Adaptive
MNDA	Regulatory.T.cell	Adaptive
MRC1	Regulatory.T.cell	Adaptive
MS4A6A	Regulatory.T.cell	Adaptive
PELO	Regulatory.T.cell	Adaptive
PLEK	Regulatory.T.cell	Adaptive
PRSS23	Regulatory.T.cell	Adaptive
PTGIR	Regulatory.T.cell	Adaptive
ST8SIA4	Regulatory.T.cell	Adaptive
STAB1	Regulatory.T.cell	Adaptive
B3GAT1	T.follicular.helper.cell	Adaptive
CDK5R1	T.follicular.helper.cell	Adaptive
PDCD1	T.follicular.helper.cell	Adaptive
BCL6	T.follicular.helper.cell	Adaptive
CD200	T.follicular.helper.cell	Adaptive
CD83	T.follicular.helper.cell	Adaptive
CD84	T.follicular.helper.cell	Adaptive
FGF2	T.follicular.helper.cell	Adaptive
GPR18	T.follicular.helper.cell	Adaptive
CEBPA	T.follicular.helper.cell	Adaptive
CECR1	T.follicular.helper.cell	Adaptive
CLEC10A	T.follicular.helper.cell	Adaptive
CLEC4A	T.follicular.helper.cell	Adaptive
CSF1R	T.follicular.helper.cell	Adaptive
CTSS	T.follicular.helper.cell	Adaptive
DMN	T.follicular.helper.cell	Adaptive
DPP4	T.follicular.helper.cell	Adaptive
LRRC32	T.follicular.helper.cell	Adaptive
MC5R	T.follicular.helper.cell	Adaptive
MICA	T.follicular.helper.cell	Adaptive
NCAM1	T.follicular.helper.cell	Adaptive
NCR2	T.follicular.helper.cell	Adaptive
NRP1	T.follicular.helper.cell	Adaptive
PDCD1LG2	T.follicular.helper.cell	Adaptive
PDCD6	T.follicular.helper.cell	Adaptive
PRDX1	T.follicular.helper.cell	Adaptive
RAE1	T.follicular.helper.cell	Adaptive
RAET1E	T.follicular.helper.cell	Adaptive
SIGLEC7	T.follicular.helper.cell	Adaptive
SIGLEC9	T.follicular.helper.cell	Adaptive
TYRO3	T.follicular.helper.cell	Adaptive
CHST12	T.follicular.helper.cell	Adaptive
CLIC3	T.follicular.helper.cell	Adaptive
IVNS1ABP	T.follicular.helper.cell	Adaptive
KIR2DL2	T.follicular.helper.cell	Adaptive
LGMN	T.follicular.helper.cell	Adaptive
CD70	Type.1.T.helper.cell	Adaptive
TBX21	Type.1.T.helper.cell	Adaptive
ADAM8	Type.1.T.helper.cell	Adaptive
AHCYL2	Type.1.T.helper.cell	Adaptive
ALCAM	Type.1.T.helper.cell	Adaptive
B3GALNT1	Type.1.T.helper.cell	Adaptive
BBS12	Type.1.T.helper.cell	Adaptive
BST1	Type.1.T.helper.cell	Adaptive
CD151	Type.1.T.helper.cell	Adaptive
CD47	Type.1.T.helper.cell	Adaptive
CD48	Type.1.T.helper.cell	Adaptive
CD52	Type.1.T.helper.cell	Adaptive
CD53	Type.1.T.helper.cell	Adaptive
CD59	Type.1.T.helper.cell	Adaptive
CD6	Type.1.T.helper.cell	Adaptive
CD68	Type.1.T.helper.cell	Adaptive
CD7	Type.1.T.helper.cell	Adaptive
CD96	Type.1.T.helper.cell	Adaptive
CFHR3	Type.1.T.helper.cell	Adaptive
CHRM3	Type.1.T.helper.cell	Adaptive
CLEC7A	Type.1.T.helper.cell	Adaptive
COL23A1	Type.1.T.helper.cell	Adaptive
COL4A4	Type.1.T.helper.cell	Adaptive
COL5A3	Type.1.T.helper.cell	Adaptive
DAB1	Type.1.T.helper.cell	Adaptive
DLEU7	Type.1.T.helper.cell	Adaptive
DOC2B	Type.1.T.helper.cell	Adaptive
EMP1	Type.1.T.helper.cell	Adaptive
F12	Type.1.T.helper.cell	Adaptive
FURIN	Type.1.T.helper.cell	Adaptive
GAB3	Type.1.T.helper.cell	Adaptive
GATM	Type.1.T.helper.cell	Adaptive
GFPT2	Type.1.T.helper.cell	Adaptive
GPR25	Type.1.T.helper.cell	Adaptive
GREM2	Type.1.T.helper.cell	Adaptive
HAVCR1	Type.1.T.helper.cell	Adaptive
HSD11B1	Type.1.T.helper.cell	Adaptive
HUNK	Type.1.T.helper.cell	Adaptive
IGF2	Type.1.T.helper.cell	Adaptive
RCSD1	Type.1.T.helper.cell	Adaptive
RYR1	Type.1.T.helper.cell	Adaptive
SAV1	Type.1.T.helper.cell	Adaptive
SELE	Type.1.T.helper.cell	Adaptive
SELP	Type.1.T.helper.cell	Adaptive
SH3KBP1	Type.1.T.helper.cell	Adaptive
SIT1	Type.1.T.helper.cell	Adaptive
SLC35B3	Type.1.T.helper.cell	Adaptive
SIGLEC10	Type.1.T.helper.cell	Adaptive
SKAP1	Type.1.T.helper.cell	Adaptive
THUMPD2	Type.1.T.helper.cell	Adaptive
TIGIT	Type.1.T.helper.cell	Adaptive
ZEB2	Type.1.T.helper.cell	Adaptive
ENC1	Type.1.T.helper.cell	Adaptive
FAM134B	Type.1.T.helper.cell	Adaptive
FBXO30	Type.1.T.helper.cell	Adaptive
FCGR2C	Type.1.T.helper.cell	Adaptive
STAC	Type.1.T.helper.cell	Adaptive
LTC4S	Type.1.T.helper.cell	Adaptive
MAN1B1	Type.1.T.helper.cell	Adaptive
MDH1	Type.1.T.helper.cell	Adaptive
MMD	Type.1.T.helper.cell	Adaptive
RGS16	Type.1.T.helper.cell	Adaptive
IL12A	Type.1.T.helper.cell	Adaptive
P2RX5	Type.1.T.helper.cell	Adaptive
CD97	Type.1.T.helper.cell	Adaptive
ITGB4	Type.1.T.helper.cell	Adaptive
ICAM3	Type.1.T.helper.cell	Adaptive
METRNL	Type.1.T.helper.cell	Adaptive
TNFRSF1A	Type.1.T.helper.cell	Adaptive
IRF1	Type.1.T.helper.cell	Adaptive
HTR2B	Type.1.T.helper.cell	Adaptive
CALD1	Type.1.T.helper.cell	Adaptive
MOCOS	Type.1.T.helper.cell	Adaptive
TRAF3IP2	Type.1.T.helper.cell	Adaptive
TLR8	Type.1.T.helper.cell	Adaptive
TRAF1	Type.1.T.helper.cell	Adaptive
DUSP14	Type.1.T.helper.cell	Adaptive
IL17A	Type.17.T.helper.cell	Adaptive
IL17RA	Type.17.T.helper.cell	Adaptive
C2CD4A	Type.17.T.helper.cell	Adaptive
C2CD4B	Type.17.T.helper.cell	Adaptive
CA2	Type.17.T.helper.cell	Adaptive
CCDC65	Type.17.T.helper.cell	Adaptive
CEACAM3	Type.17.T.helper.cell	Adaptive
IL17C	Type.17.T.helper.cell	Adaptive
IL17F	Type.17.T.helper.cell	Adaptive
IL17RC	Type.17.T.helper.cell	Adaptive
IL17RE	Type.17.T.helper.cell	Adaptive
IL23A	Type.17.T.helper.cell	Adaptive
ILDR1	Type.17.T.helper.cell	Adaptive
LONRF3	Type.17.T.helper.cell	Adaptive
SH2D6	Type.17.T.helper.cell	Adaptive
TNIP2	Type.17.T.helper.cell	Adaptive
ABCA1	Type.17.T.helper.cell	Adaptive
ABCB1	Type.17.T.helper.cell	Adaptive
ADAMTS12	Type.17.T.helper.cell	Adaptive
ANK1	Type.17.T.helper.cell	Adaptive
ANKRD22	Type.17.T.helper.cell	Adaptive
B3GALT2	Type.17.T.helper.cell	Adaptive
CAMTA1	Type.17.T.helper.cell	Adaptive
CCR9	Type.17.T.helper.cell	Adaptive
CD40	Type.17.T.helper.cell	Adaptive
GPR44	Type.17.T.helper.cell	Adaptive
IFT80	Type.17.T.helper.cell	Adaptive
ASB2	Type.2.T.helper.cell	Adaptive
CSRP2	Type.2.T.helper.cell	Adaptive
DAPK1	Type.2.T.helper.cell	Adaptive
DLC1	Type.2.T.helper.cell	Adaptive
DNAJC12	Type.2.T.helper.cell	Adaptive
DUSP6	Type.2.T.helper.cell	Adaptive
GNAI1	Type.2.T.helper.cell	Adaptive
LAMP3	Type.2.T.helper.cell	Adaptive
NRP2	Type.2.T.helper.cell	Adaptive
OSBPL1A	Type.2.T.helper.cell	Adaptive
PDE4B	Type.2.T.helper.cell	Adaptive
PHLDA1	Type.2.T.helper.cell	Adaptive
PLA2G4A	Type.2.T.helper.cell	Adaptive
RAB27B	Type.2.T.helper.cell	Adaptive
RBMS3	Type.2.T.helper.cell	Adaptive
RNF125	Type.2.T.helper.cell	Adaptive
TMPRSS3	Type.2.T.helper.cell	Adaptive
GATA3	Type.2.T.helper.cell	Adaptive
BIRC5	Type.2.T.helper.cell	Adaptive
CDC25C	Type.2.T.helper.cell	Adaptive
CDC7	Type.2.T.helper.cell	Adaptive
CENPF	Type.2.T.helper.cell	Adaptive
CXCR6	Type.2.T.helper.cell	Adaptive
DHFR	Type.2.T.helper.cell	Adaptive
EVI5	Type.2.T.helper.cell	Adaptive
GSTA4	Type.2.T.helper.cell	Adaptive
HELLS	Type.2.T.helper.cell	Adaptive
IL26	Type.2.T.helper.cell	Adaptive
LAIR2	Type.2.T.helper.cell	Adaptive
ABCD1	Activated.dendritic.cell	Innate
C1QC	Activated.dendritic.cell	Innate
CAPG	Activated.dendritic.cell	Innate
CCL3L3	Activated.dendritic.cell	Innate
CD207	Activated.dendritic.cell	Innate
CD302	Activated.dendritic.cell	Innate
ATP5B	Activated.dendritic.cell	Innate
ATP5L	Activated.dendritic.cell	Innate
ATP6V1A	Activated.dendritic.cell	Innate
BCL2L1	Activated.dendritic.cell	Innate
C1QB	Activated.dendritic.cell	Innate
SNURF	Activated.dendritic.cell	Innate
SPCS3	Activated.dendritic.cell	Innate
CCNA1	Activated.dendritic.cell	Innate
CEACAM8	Activated.dendritic.cell	Innate
NOS2	Activated.dendritic.cell	Innate
SRA1	Activated.dendritic.cell	Innate
TNFRSF6B	Activated.dendritic.cell	Innate
TREM1	Activated.dendritic.cell	Innate
TREML1	Activated.dendritic.cell	Innate
RHOA	Activated.dendritic.cell	Innate
SLC25A37	Activated.dendritic.cell	Innate
TNFSF14	Activated.dendritic.cell	Innate
TREML4	Activated.dendritic.cell	Innate
VNN2	Activated.dendritic.cell	Innate
XPO6	Activated.dendritic.cell	Innate
CLEC4C	Activated.dendritic.cell	Innate
TNFAIP2	Activated.dendritic.cell	Innate
UBD	Activated.dendritic.cell	Innate
ACTR3	Activated.dendritic.cell	Innate
RAB1A	Activated.dendritic.cell	Innate
SLA	Activated.dendritic.cell	Innate
HLA-DQA2	Activated.dendritic.cell	Innate
SIGLEC5	Activated.dendritic.cell	Innate
SLAMF9	Activated.dendritic.cell	Innate
ABAT	CD56bright.natural.killer.cell	Innate
C11orf75	CD56bright.natural.killer.cell	Innate
C5orf15	CD56bright.natural.killer.cell	Innate
CDHR1	CD56bright.natural.killer.cell	Innate
DCAF12	CD56bright.natural.killer.cell	Innate
DYNLL1	CD56bright.natural.killer.cell	Innate
GPR137B	CD56bright.natural.killer.cell	Innate
HCP5	CD56bright.natural.killer.cell	Innate
HDGFRP2	CD56bright.natural.killer.cell	Innate
KRT86	CD56bright.natural.killer.cell	Innate
MLST8	CD56bright.natural.killer.cell	Innate
ELMOD3	CD56bright.natural.killer.cell	Innate
ENTPD5	CD56bright.natural.killer.cell	Innate
FAM119A	CD56bright.natural.killer.cell	Innate
FAM179A	CD56bright.natural.killer.cell	Innate
CLIC2	CD56bright.natural.killer.cell	Innate
COX7A2L	CD56bright.natural.killer.cell	Innate
CREB3L4	CD56bright.natural.killer.cell	Innate
CSF1	CD56bright.natural.killer.cell	Innate
CSNK2A2	CD56bright.natural.killer.cell	Innate
CSTA	CD56bright.natural.killer.cell	Innate
CSTB	CD56bright.natural.killer.cell	Innate
CTPS	CD56bright.natural.killer.cell	Innate
CTSD	CD56bright.natural.killer.cell	Innate
FST	CD56bright.natural.killer.cell	Innate
GATA2	CD56bright.natural.killer.cell	Innate
GMPR	CD56bright.natural.killer.cell	Innate
HDC	CD56bright.natural.killer.cell	Innate
HEY1	CD56bright.natural.killer.cell	Innate
HOXA1	CD56bright.natural.killer.cell	Innate
HS2ST1	CD56bright.natural.killer.cell	Innate
HS3ST1	CD56bright.natural.killer.cell	Innate
BCL11B	CD56bright.natural.killer.cell	Innate
CDH3	CD56bright.natural.killer.cell	Innate
MYL6B	CD56bright.natural.killer.cell	Innate
NAA16	CD56bright.natural.killer.cell	Innate
ClQA	CD56bright.natural.killer.cell	Innate
ClQB	CD56bright.natural.killer.cell	Innate
CYP27B1	CD56bright.natural.killer.cell	Innate
EIF3M	CD56bright.natural.killer.cell	Innate
CYP27A1	CD56dim.natural.killer.cell	Innate
DDX55	CD56dim.natural.killer.cell	Innate
DYRK2	CD56dim.natural.killer.cell	Innate
RPL37A	CD56dim.natural.killer.cell	Innate
NOTCH3	CD56dim.natural.killer.cell	Innate
AKR7A3	CD56dim.natural.killer.cell	Innate
GPRC5C	CD56dim.natural.killer.cell	Innate
GRIN1	CD56dim.natural.killer.cell	Innate
HLA-E	CD56dim.natural.killer.cell	Innate
PORCN	CD56dim.natural.killer.cell	Innate
PSMC4	CD56dim.natural.killer.cell	Innate
UPP1	CD56dim.natural.killer.cell	Innate
IL21R	CD56dim.natural.killer.cell	Innate
KIR2DS1	CD56dim.natural.killer.cell	Innate
KIR2DS2	CD56dim.natural.killer.cell	Innate
KIR2DS5	CD56dim.natural.killer.cell	Innate
GIPR	Eosinophil	Innate
KRT18P50	Eosinophil	Innate
LRMP	Eosinophil	Innate
FOSB	Eosinophil	Innate
RRP12	Eosinophil	Innate
GPR183	Eosinophil	Innate
NR4A3	Eosinophil	Innate
ST3GAL6	Eosinophil	Innate
DEPDC5	Eosinophil	Innate
PDE6C	Eosinophil	Innate
PKD2L2	Eosinophil	Innate
GPR65	Eosinophil	Innate
IL5RA	Eosinophil	Innate
P2RY14	Eosinophil	Innate
DACH1	Eosinophil	Innate
DAPK2	Eosinophil	Innate
EMR3	Eosinophil	Innate
ACADM	Immature.dendritic.cell	Innate
AHCYL1	Immature.dendritic.cell	Innate
ALDH1A2	Immature.dendritic.cell	Innate
ALDH3A2	Immature.dendritic.cell	Innate
ALDH9A1	Immature.dendritic.cell	Innate
ALOX15	Immature.dendritic.cell	Innate
AMT	Immature.dendritic.cell	Innate
ARL1	Immature.dendritic.cell	Innate
ATIC	Immature.dendritic.cell	Innate
ATP5A1	Immature.dendritic.cell	Innate
CAPZA1	Immature.dendritic.cell	Innate
LILRA5	Immature.dendritic.cell	Innate
RDX	Immature.dendritic.cell	Innate
RRAGD	Immature.dendritic.cell	Innate
TACSTD2	Immature.dendritic.cell	Innate
INPP5F	Immature.dendritic.cell	Innate
RAB38	Immature.dendritic.cell	Innate
PLAU	Immature.dendritic.cell	Innate
CSF3R	Immature.dendritic.cell	Innate
SLC18A2	Immature.dendritic.cell	Innate
AMPD2	Immature.dendritic.cell	Innate
CLTB	Immature.dendritic.cell	Innate
C1orf162	Immature.dendritic.cell	Innate
AIF1	Macrophage	Innate
CCL1	Macrophage	Innate
CCL14	Macrophage	Innate
CCL23	Macrophage	Innate
CCL26	Macrophage	Innate
CD300LB	Macrophage	Innate
CNR1	Macrophage	Innate
CNR2	Macrophage	Innate
EIF1	Macrophage	Innate
EIF4A1	Macrophage	Innate
FPR1	Macrophage	Innate
FPR2	Macrophage	Innate
FRAT2	Macrophage	Innate
GPR27	Macrophage	Innate
GPR77	Macrophage	Innate
RNASE2	Macrophage	Innate
MS4A2	Macrophage	Innate
BASP1	Macrophage	Innate
IGSF6	Macrophage	Innate
HK3	Macrophage	Innate
VNN1	Macrophage	Innate
FES	Macrophage	Innate
NPL	Macrophage	Innate
FZD2	Macrophage	Innate
FAM198B	Macrophage	Innate
HNMT	Macrophage	Innate
SLC15A3	Macrophage	Innate
CD4	Macrophage	Innate
TXNDC3	Macrophage	Innate
FRMD4A	Macrophage	Innate
CRYBB1	Macrophage	Innate
HRH1	Macrophage	Innate
WNT5B	Macrophage	Innate
ADAMTS3	Mast.cell	Innate
CPA3	Mast.cell	Innate
CMA1	Mast.cell	Innate
CTSG	Mast.cell	Innate
ARHGAP15	Mast.cell	Innate
CPM	Mast.cell	Innate
FCN1	Mast.cell	Innate
FTL	Mast.cell	Innate
HSPA6	Mast.cell	Innate
ITGA9	Mast.cell	Innate
RNASE3	Mast.cell	Innate
S100A4	Mast.cell	Innate
SIGLEC8	Mast.cell	Innate
SLC6A4	Mast.cell	Innate
PTGS2	Mast.cell	Innate
EGR3	Mast.cell	Innate
PILRA	Mast.cell	Innate
CCR2	MDSC	Innate
CD14	MDSC	Innate
CD2	MDSC	Innate
CD86	MDSC	Innate
CXCR4	MDSC	Innate
FCGR2A	MDSC	Innate
FCGR2B	MDSC	Innate
FCGR3A	MDSC	Innate
FERMT3	MDSC	Innate
GPSM3	MDSC	Innate
IL18BP	MDSC	Innate
IL4R	MDSC	Innate
ITGAL	MDSC	Innate
ITGAM	MDSC	Innate
PARVG	MDSC	Innate
PSAP	MDSC	Innate
PTGER2	MDSC	Innate
PTGES2	MDSC	Innate
S100A8	MDSC	Innate
S100A9	MDSC	Innate
ASGR2	Monocyte	Innate
CFP	Monocyte	Innate
ASGR1	Monocyte	Innate
CD1D	Monocyte	Innate
UPK3A	Monocyte	Innate
ACTG1	Monocyte	Innate
ANXA5	Monocyte	Innate
ATP6V1B2	Monocyte	Innate
CFL1	Monocyte	Innate
DAZAP2	Monocyte	Innate
CTBS	Monocyte	Innate
EMR4P	Monocyte	Innate
HIVEP2	Monocyte	Innate
MARCKSL1	Monocyte	Innate
MBP	Monocyte	Innate
MMP15	Monocyte	Innate
PNPLA6	Monocyte	Innate
TMBIM6	Monocyte	Innate
PQBP1	Monocyte	Innate
TEX264	Monocyte	Innate
IKZF1	Monocyte	Innate
AKT3	Natural.killer.cell	Innate
AXL	Natural.killer.cell	Innate
BST2	Natural.killer.cell	Innate
CDH2	Natural.killer.cell	Innate
CRTAM	Natural.killer.cell	Innate
CSF2RA	Natural.killer.cell	Innate
CTSZ	Natural.killer.cell	Innate
CXCL1	Natural.killer.cell	Innate
CYTH1	Natural.killer.cell	Innate
DAXX	Natural.killer.cell	Innate
DGKH	Natural.killer.cell	Innate
DLL4	Natural.killer.cell	Innate
DPYD	Natural.killer.cell	Innate
ERBB3	Natural.killer.cell	Innate
F11R	Natural.killer.cell	Innate
FAM27A	Natural.killer.cell	Innate
FAM49A	Natural.killer.cell	Innate
FASLG	Natural.killer.cell	Innate
FCGR1A	Natural.killer.cell	Innate
FN1	Natural.killer.cell	Innate
FSTL1	Natural.killer.cell	Innate
FUCA1	Natural.killer.cell	Innate
GBP3	Natural.killer.cell	Innate
GLS2	Natural.killer.cell	Innate
GRB2	Natural.killer.cell	Innate
LST1	Natural.killer.cell	Innate
BCL2	Natural.killer.cell	Innate
CDC5L	Natural.killer.cell	Innate
FGF18	Natural.killer.cell	Innate
FUT5	Natural.killer.cell	Innate
FZR1	Natural.killer.cell	Innate
GAGE2	Natural.killer.cell	Innate
IGFBP5	Natural.killer.cell	Innate
KANK2	Natural.killer.cell	Innate
LDB3	Natural.killer.cell	Innate
BTN2A2	Natural.killer.T.cell	Innate
CD101	Natural.killer.T.cell	Innate
CD109	Natural.killer.T.cell	Innate
CNPY3	Natural.killer.T.cell	Innate
CNPY4	Natural.killer.T.cell	Innate
CREB1	Natural.killer.T.cell	Innate
CRTC2	Natural.killer.T.cell	Innate
CRTC3	Natural.killer.T.cell	Innate
CSF2	Natural.killer.T.cell	Innate
KLRC1	Natural.killer.T.cell	Innate
FUT4	Natural.killer.T.cell	Innate
ICAM2	Natural.killer.T.cell	Innate
IL32	Natural.killer.T.cell	Innate
LAMP2	Natural.killer.T.cell	Innate
LILRB5	Natural.killer.T.cell	Innate
KLRG1	Natural.killer.T.cell	Innate
HSPA4	Natural.killer.T.cell	Innate
HSPB6	Natural.killer.T.cell	Innate
ISM2	Natural.killer.T.cell	Innate
ITIH2	Natural.killer.T.cell	Innate
KDM4C	Natural.killer.T.cell	Innate
KIR2DS4	Natural.killer.T.cell	Innate
KIRREL3	Natural.killer.T.cell	Innate
SDCBP	Natural.killer.T.cell	Innate
NFATC2IP	Natural.killer.T.cell	Innate
MICB	Natural.killer.T.cell	Innate
KIR2DL1	Natural.killer.T.cell	Innate
KIR2DL3	Natural.killer.T.cell	Innate
KIR3DL1	Natural.killer.T.cell	Innate
KIR3DL2	Natural.killer.T.cell	Innate
NCR1	Natural.killer.T.cell	Innate
FOSL1	Natural.killer.T.cell	Innate
TSLP	Natural.killer.T.cell	Innate
SLC7A7	Natural.killer.T.cell	Innate
SPP1	Natural.killer.T.cell	Innate
TREM2	Natural.killer.T.cell	Innate
UBASH3A	Natural.killer.T.cell	Innate
YBX2	Natural.killer.T.cell	Innate
CCDC88A	Natural.killer.T.cell	Innate
CLEC1A	Natural.killer.T.cell	Innate
THBD	Natural.killer.T.cell	Innate
PDPN	Natural.killer.T.cell	Innate
VCAM1	Natural.killer.T.cell	Innate
EMR1	Natural.killer.T.cell	Innate
CREB5	Neutrophil	Innate
CDA	Neutrophil	Innate
CHST15	Neutrophil	Innate
S100A12	Neutrophil	Innate
APOBEC3A	Neutrophil	Innate
CASP5	Neutrophil	Innate
MMP25	Neutrophil	Innate
HAL	Neutrophil	Innate
C1orf183	Neutrophil	Innate
FFAR2	Neutrophil	Innate
MAK	Neutrophil	Innate
CXCR1	Neutrophil	Innate
STEAP4	Neutrophil	Innate
MGAM	Neutrophil	Innate
BTNL8	Neutrophil	Innate
CXCR2	Neutrophil	Innate
TNFRSF10C	Neutrophil	Innate
VNN3	Neutrophil	Innate
CBX6	Plasmacytoid.dendritic.cell	Innate
DAB2	Plasmacytoid.dendritic.cell	Innate
DDX17	Plasmacytoid.dendritic.cell	Innate
HIGD1A	Plasmacytoid.dendritic.cell	Innate
IDH3A	Plasmacytoid.dendritic.cell	Innate
IL3RA	Plasmacytoid.dendritic.cell	Innate
MAGED1	Plasmacytoid.dendritic.cell	Innate
NUCB2	Plasmacytoid.dendritic.cell	Innate
OFD1	Plasmacytoid.dendritic.cell	Innate
OGT	Plasmacytoid.dendritic.cell	Innate
PDIA4	Plasmacytoid.dendritic.cell	Innate
SERTAD2	Plasmacytoid.dendritic.cell	Innate
SIRPA	Plasmacytoid.dendritic.cell	Innate
TMED2	Plasmacytoid.dendritic.cell	Innate
ENG	Plasmacytoid.dendritic.cell	Innate
FCAR	Plasmacytoid.dendritic.cell	Innate
IGF1	Plasmacytoid.dendritic.cell	Innate
ITGA2B	Plasmacytoid.dendritic.cell	Innate
GABARAP	Plasmacytoid.dendritic.cell	Innate
GPX1	Plasmacytoid.dendritic.cell	Innate
KRT23	Plasmacytoid.dendritic.cell	Innate
PROK2	Plasmacytoid.dendritic.cell	Innate
RALB	Plasmacytoid.dendritic.cell	Innate
RETNLB	Plasmacytoid.dendritic.cell	Innate
RNF141	Plasmacytoid.dendritic.cell	Innate
SEC14L1	Plasmacytoid.dendritic.cell	Innate
SEPX1	Plasmacytoid.dendritic.cell	Innate
EMP3	Plasmacytoid.dendritic.cell	Innate
CD300LF	Plasmacytoid.dendritic.cell	Innate
ABTB1	Plasmacytoid.dendritic.cell	Innate
KLHL21	Plasmacytoid.dendritic.cell	Innate
PHRF1	Plasmacytoid.dendritic.cell	Innate
